# Supplementary material
Source: Research Square preprint supplement (doi:10.21203/rs.3.rs-9060414/v1)
Supplement: Supplementary file 1 [file 10de33a1ccbb6056b8cc0204.xlsx]

## Sheet: Supp_Table_1
Year	S. cerevisiae	C. elegans	D. melanogaster	D.rerio	M.musculus	H.sapiens
1975	1	6	12	0	200	1028
1976	3	4	14	0	206	959
1977	1	4	16	0	208	1011
1978	3	5	13	0	297	1279
1979	2	3	27	0	310	1357
1980	8	3	15	0	360	1695
1981	0	1	20	0	373	1707
1982	7	2	10	0	417	1986
1983	1	7	15	0	393	1826
1984	3	9	19	0	438	1858
1985	3	5	14	1	356	1971
1986	5	6	11	0	411	2142
1987	3	5	18	1	398	2122
1988	1	11	12	0	370	2270
1989	4	4	18	0	436	2655
1990	3	4	20	0	430	2603
1991	5	3	20	1	411	2613
1992	4	5	28	0	415	2763
1993	5	17	46	0	463	2759
1994	8	8	28	0	427	2758
1995	13	15	38	2	463	2781
1996	12	14	33	0	413	3005
1997	14	7	35	2	487	3237
1998	11	17	41	4	463	3171
1999	25	17	48	1	544	3321
2000	32	32	48	3	562	3623
2001	40	27	42	7	621	3640
2002	44	30	51	4	670	3850
2003	53	45	68	7	681	4141
2004	57	49	74	7	713	4376
2005	71	44	76	5	831	5035
2006	65	62	87	5	940	5439
2007	81	81	98	6	994	5814
2008	96	84	99	12	1064	6431
2009	99	111	111	19	1122	7462
2010	112	107	116	25	1245	8033
2011	123	118	112	28	1285	8648
2012	123	124	147	28	1394	9141
2013	137	160	155	25	1458	10000
2014	130	163	163	16	1514	10710
2015	133	180	166	26	1618	11218
2016	138	192	188	41	1713	11429
2017	138	187	186	35	1631	12037
2018	122	196	206	40	1612	12275
2019	139	231	190	35	1695	12931
2020	148	274	215	38	1996	14313
2021	150	242	227	42	2113	14978
2022	130	305	222	41	2161	14869
2023	148	305	211	51	2262	14275
2024	118	326	220	46	2512	16375
2025	75	211	166	51	1867	10817
