# Supplementary material
Source: Research Square preprint supplement (doi:10.21203/rs.3.rs-9060414/v1)
Supplement: Supplementary file 2 [file 5bf0884635c1a8b9bc8c04b9.xlsx]

## Sheet: Supp_Table_7
Model Type	KG_Type	MetricType	Hit@1	Hit@3	Hit@10	MR	MRR
transe	Aging	Validation	0.777064	0.915596	0.974518	1.80888	0.853505
complex	Aging	Validation	0.746731	0.904563	0.973837	1.91016	0.833149
rotate	Aging	Validation	0.783611	0.912464	0.966657	1.91139	0.854759
simple	Aging	Validation	0.764879	0.901277	0.966349	1.98537	0.841667
dismult	Aging	Validation	0.65857	0.838493	0.947381	2.55636	0.763312
rescal	Aging	Validation	0.88583	0.948809	0.983483	1.47145	0.922662
complex	EvoAge	Validation	0.724569	0.87444	0.980548	1.96216	0.812507
rescal	EvoAge	Validation	0.779446	0.89653	0.987536	1.75388	0.848793
rotate	EvoAge	Validation	0.762287	0.889526	0.982358	1.84475	0.837085
simple	EvoAge	Validation	0.748405	0.879537	0.981146	1.91251	0.826708
transe	EvoAge	Validation	0.00743	0.033001	0.217262	13.8517	0.095354
dismult	EvoAge	Validation	0.721259	0.860274	0.970516	2.12193	0.805246
transe	Aging	Testing	0.784025	0.916675	0.974575	1.79895	0.857522
complex	Aging	Testing	0.756612	0.908124	0.974778	1.87585	0.839593
rotate	Aging	Testing	0.786986	0.913332	0.967306	1.89772	0.856887
simple	Aging	Testing	0.76844	0.903427	0.966689	1.97105	0.844117
dismult	Aging	Testing	0.666618	0.843474	0.948347	2.51636	0.768944
rescal	Aging	Testing	0.885952	0.949515	0.983791	1.46894	0.922947
rotate	EvoAge	Testing	0.79477	0.912443	0.987447	1.67363	0.862084
complex	EvoAge	Testing	0.730747	0.876897	0.980729	1.94439	0.816637
rescal	EvoAge	Testing	0.78795	0.904871	0.991125	1.68025	0.856278
simple	EvoAge	Testing	0.742474	0.878621	0.980827	1.92484	0.823297
transe	EvoAge	Testing	0.006206	0.031862	0.200326	14.0274	0.093008
dismult	EvoAge	Testing	0.710838	0.860277	0.97156	2.12145	0.799925
Model Type	Embedding Size	MetricType	Hit@1	Hit@3	Hit@10	MR	MRR	KG_type
RESCAL	64	Validation	0.885725	0.950537	0.984501	1.45577	0.92322	Aging
RESCAL	128	Validation	0.887385	0.947659	0.982714	1.48613	0.922941	Aging
RESCAL	256	Validation	0.887341	0.944946	0.983199	1.50974	0.921791	Aging
RESCAL	512	Validation	0.896708	0.947323	0.986043	1.46456	0.927833	Aging
RESCAL	64	Testing	0.885952	0.949515	0.983791	1.46894	0.922947	Aging
RESCAL	128	Testing	0.888375	0.945938	0.981565	1.50469	0.922778	Aging
RESCAL	256	Testing	0.885962	0.94397	0.981755	1.52694	0.920679	Aging
RESCAL	512	Testing	0.89755	0.947054	0.984823	1.47644	0.927956	Aging
RotatE	64	Validation	0.762287	0.889526	0.982358	1.84475	0.837085	EvoAge
RotatE	128	Validation	0.912563	0.979072	0.997459	1.19815	0.946872	EvoAge
RotatE	256	Validation	0.950896	0.990376	0.998202	1.10729	0.970924	EvoAge
RotatE	512	Validation	0.962811	0.992067	0.998197	1.0882	0.977775	EvoAge
RotatE	64	Testing	0.795229	0.913277	0.987603	1.66839	0.862608	EvoAge
RotatE	128	Testing	0.930518	0.985035	0.997962	1.15148	0.958379	EvoAge
RotatE	256	Testing	0.960246	0.992113	0.998257	1.09025	0.976435	EvoAge
RotatE	512	Testing	0.96728	0.992612	0.998204	1.08127	0.9803	EvoAge
