# Supplementary material
Source: Research Square preprint supplement (doi:10.21203/rs.3.rs-9060414/v1)
Supplement: Supplementary file 3 [file 6216ab36dee91a05721f5d85.xlsx]

## Sheet: Supp_Table_13
--- GMM ANALYSIS (1 vs 2 COMPONENTS) ---
Column	BIC (1 Comp)	BIC (2 Comp)	Conclusion
Mm_wt_Postsynaptic_intensity	10899	10122	TWO Subpopulations
Mm_tg_Postsynaptic_intensity	11082	10416	TWO Subpopulations
Mm_wt_Perisynaptic_intensity	3268	2961	TWO Subpopulations
Mm_tg_Perisynaptic_intensity	10478	9899	TWO Subpopulations
Hs_control_Postsynaptic_intensity	13180	11368	TWO Subpopulations
Hs_AD_Postsynaptic_intensity	4953	3150	TWO Subpopulations
Hs_control_Perisynaptic_intensity	7698	6806	TWO Subpopulations
Hs_AD_Perisynaptic_intensity	17826	11749	TWO Subpopulations
ipsc_GC_Postsynaptic_intensity	17656	15331	TWO Subpopulations
ipsc_mutant_Postsynaptic_intensity	20993	19062	TWO Subpopulations
ipsc_GC_Perisynaptic_intensity	27044	24124	TWO Subpopulations
ipsc_mutant_Perisynaptic_intensity	14239	13121	TWO Subpopulations
Mm_wt_Postsynaptic_length	-1277	-1558	TWO Subpopulations
Mm_tg_Postsynaptic_length	-1604	-2065	TWO Subpopulations
Mm_wt_Perisynaptic_length	-637	-709	TWO Subpopulations
Mm_tg_Perisynaptic_length	-1457	-1915	TWO Subpopulations
Hs_control_Postsynaptic_length	-2447	-3188	TWO Subpopulations
Hs_AD_Postsynaptic_length	-1028	-1306	TWO Subpopulations
Hs_control_Perisynaptic_length	-1687	-1977	TWO Subpopulations
Hs_AD_Perisynaptic_length	-2669	-3568	TWO Subpopulations
ipsc_GC_Postsynaptic_length	-3565	-4742	TWO Subpopulations
ipsc_mutant_Postsynaptic_length	-5213	-6495	TWO Subpopulations
ipsc_GC_Perisynaptic_length	-6569	-8138	TWO Subpopulations
ipsc_mutant_Perisynaptic_length	-2954	-3626	TWO Subpopulations
Mm_wt_Postsynaptic_area	-4051	-4522	TWO Subpopulations
Mm_tg_Postsynaptic_area	-4764	-5434	TWO Subpopulations
Mm_wt_Perisynaptic_area	-1852	-1914	TWO Subpopulations
Mm_tg_Perisynaptic_area	-4684	-5528	TWO Subpopulations
Hs_control_Postsynaptic_area	-4051	-4522	TWO Subpopulations
Hs_AD_Postsynaptic_area	-4764	-5434	TWO Subpopulations
Hs_control_Perisynaptic_area	-1852	-1914	TWO Subpopulations
Hs_AD_Perisynaptic_area	-4684	-5528	TWO Subpopulations
ipsc_GC_Postsynaptic_area	-9505	-10374	TWO Subpopulations
ipsc_mutant_Postsynaptic_area	-12684	-13722	TWO Subpopulations
ipsc_GC_Perisynaptic_area	-16085	-17110	TWO Subpopulations
ipsc_mutant_Perisynaptic_area	-7514	-8131	TWO Subpopulations
