# Supplementary material
Source: Research Square preprint supplement (doi:10.21203/rs.3.rs-9060414/v1)
Supplement: Supplementary file 4 [file 742c8d3d18ba3005db9f1e99.xlsx]

## Sheet: Supp_Table_4
Relation	H. sapiens	S. cerevisae	C. elegans	D. melanogaster	D. rerio	M. musculus	PMID	EvoKG
Gene_Mutation	252	0	0	0	0	0	0	252
ChemicalEntity_Tissue	258	0	0	0	0	0	0	258
Mutation_Gene	277	0	0	0	0	0	0	277
ChemicalEntity_BiologicalProcess	294	0	0	0	0	9	0	303
Protein_Phenotype	328	0	0	0	0	0	0	328
Disease_Mutation	425	0	0	0	0	0	0	425
Mutation_Disease	570	0	0	0	0	0	0	570
MolecularFunction_BiologicalProcess	848	0	0	0	0	0	0	848
Gene_Noeffect_BiologicalProcess	1750	0	0	0	0	6	0	1756
Gene_Inhibits_BiologicalProcess	967	50	555	107	0	315	0	1994
Gene_Promotes_BiologicalProcess	756	347	555	61	0	343	0	2062
Protein_Tissue	1133	0	778	170	0	0	0	2081
Pathway_Pathway	2545	0	0	0	0	0	0	2545
Phenotype_Gene	3326	0	0	0	0	0	0	3326
BiologicalProcess_ChemicalEntity	3744	0	0	0	0	0	0	3744
Disease_ChemicalEntity	6923	0	0	0	0	0	0	6923
ChemicalEntity_Inhibits_BiologicalProcess	6901	23	387	129	0	0	0	7440
CellularComponent_CellularComponent	7552	0	0	0	0	0	0	7552
Disease_Anatomy	8826	0	0	0	0	0	0	8826
ChemicalEntity_Pathway	10314	0	0	0	0	0	0	10314
ChemicalEntity_Mutation	11948	0	0	0	0	0	0	11948
MolecularFunction_ChemicalEntity	17669	0	0	0	0	0	0	17669
MolecularFunction_MolecularFunction	27222	0	0	0	0	0	0	27222
PlantExtract_Disease	33678	0	0	0	0	0	0	33678
Phenotype_Phenotype	34402	0	0	0	0	0	0	34402
Pathway_Gene	40964	0	0	0	0	0	0	40964
ChemicalEntity_Promotes_BiologicalProcess	47433	0	86	40	0	0	0	47559
Phenotype_Disease	51887	0	0	0	0	0	0	51887
Anatomy_Anatomy	52173	0	0	0	0	0	0	52173
Phenotype_ChemicalEntity	64784	0	0	0	0	0	0	64784
Protein_Pathway	65434	0	0	0	0	0	0	65434
PlantExtract_ChemicalEntity	73933	0	0	0	0	0	0	73933
CellularComponent_Gene	82199	0	0	0	0	0	0	82199
Disease_Disease	91784	0	0	0	0	0	0	91784
BiologicalProcess_BiologicalProcess	108463	0	0	0	0	0	0	108463
BiologicalProcess_Gene	143429	0	0	0	0	0	0	143429
Gene_Pathway	179398	0	0	0	0	0	0	179398
Gene_Chemical	235488	0	0	0	0	0	0	235488
Disease_Phenotype	240249	0	0	0	0	0	0	240249
Gene_MolecularFunction	253954	0	0	0	0	0	0	253954
Gene_CellularComponent	399951	4183	0	0	0	0	0	404134
Gene_Protein	479266	0	0	0	0	0	0	479266
Gene_BiologicalProcess	620329	0	60	21	0	2417	0	622827
ChemicalEntity_Disease	1104290	0	0	0	0	0	0	1104290
Protein_MolecularFunction	1143797	0	0	0	0	0	0	1143797
Protein_BiologicalProcess	1297756	0	0	0	0	0	0	1297756
Gene_Phenotype	774973	73397	253430	89970	136851	50505	0	1379126
Gene_Disease	1540407	0	0	0	0	0	0	1540407
Anatomy_Gene	1721930	0	0	0	0	0	0	1721930
Gene_Tissue	3639028	0	0	0	0	0	0	3639028
ChemicalEntity_Protein	3858811	0	0	0	0	0	0	3858811
Mutation_Protein	4531946	0	0	0	0	0	0	4531946
Species_associatedwith_nodes	0	0	0	0	0	0	4532983	4532983
Gene_Anatomy	8795493	0	0	0	0	0	0	8795493
ChemicalEntity_ChemicalEntity	3652965	6250862	0	0	0	9370	0	9913197
Disease_Gene	12990839	0	0	0	0	0	0	12990839
Protein_Protein	16011753	0	0	0	0	0	0	16011753
Protein_CellularComponent	21227065	0	0	0	0	0	0	21227065
Protein_Disease	31207231	0	0	0	0	0	0	31207231
Gene_Gene	5167491	872457	4053018	2455748	9691758	12851175	0	35091647
Pmid_ChemicalEntity	0	0	0	0	0	0	42205455	42205455
ChemicalEntity_Gene	2228070	2052652	9845825	7661269	18912474	21307886	0	62008176
Pmid_CellularComponent	0	0	0	0	0	0	83400960	83400960
Pmid_Disease	0	0	0	0	0	0	178298226	178298226
Pmid_Protein	0	0	0	0	0	0	230631535	230631535
Pmid_Tissue	0	0	0	0	0	0	289411158	289411158
							Total	1049367477
