# Supplementary material
Source: Research Square preprint supplement (doi:10.21203/rs.3.rs-9060414/v1)
Supplement: Supplementary file 5 [file 830695a89ea2d0126d3b4b62.xlsx]

## Sheet: Supp_Table_6
EvoAge
node id	count of edge	nodeID	nodeType	detailed_name
25909277	16700097	BTO:0000042	Tissue	animal
3292609	16698023	BTO:0001489	Tissue	whole body
80735	11830402	DOID:7	Disease	disease of anatomical entity
395197	6930726	GO:0110165	CellularComponent	cellular anatomical structure
25909477	6232680	BTO:0000570	Tissue	hematopoietic system
2573931	5822097	BTO:0000089	Tissue	blood
2798209	4934581	BTO:0000284	Tissue	organism form
287445	4779440	GO:0005622	CellularComponent	intracellular anatomical structure
25909462	4696460	BTO:0000522	Tissue	gland
25909762	4677861	BTO:0001491	Tissue	viscus
25909362	4187184	BTO:0000282	Tissue	head
79233	4137784	DOID:14566	Disease	disease of cellular proliferation
25909761	3884557	BTO:0001488	Tissue	endocrine gland
288422	3869467	GO:0043226	CellularComponent	organelle
25909759	3831426	BTO:0001484	Tissue	nervous system
288425	3659958	GO:0043229	CellularComponent	intracellular organelle
2267	3453578	DOID:1287	Disease	cardiovascular system disease
288122	3452611	GO:0032991	CellularComponent	protein-containing complex
59045	3438325	DOID:863	Disease	nervous system disease
25909302	3421094	BTO:0000088	Tissue	cardiovascular system
25910175	3348623	BTO:0003091	Tissue	urogenital system
55113	3333096	DOID:0050686	Disease	organ system cancer
288423	3186876	GO:0043227	CellularComponent	membrane-bounded organelle
25909341	3120165	BTO:0000227	Tissue	central nervous system
287501	3025336	GO:0005737	CellularComponent	cytoplasm
2798879	3014210	BTO:0001481	Tissue	plant
288427	2982848	GO:0043231	CellularComponent	intracellular membrane-bounded organelle
25909418	2978092	BTO:0000421	Tissue	connective tissue
57937	2908414	DOID:178	Disease	vascular disease
287719	2889709	GO:0016020	CellularComponent	membrane
2798130	2763420	BTO:0000142	Tissue	brain
74835	2750669	DOID:0050117	Disease	disease by infectious agent
25909596	2744816	BTO:0001043	Tissue	adult
25909760	2731381	BTO:0001486	Tissue	skeletal system
25910609	2694414	BTO:0005810	Tissue	immune system
2798342	2689589	BTO:0000574	Tissue	hematopoietic cell
25909764	2677936	BTO:0001493	Tissue	trunk
58962	2665602	DOID:77	Disease	gastrointestinal system disease
30159145	2651339	Homo sapiens	Species	Homo sapiens
2798867	2585795	BTO:0001461	Tissue	whole plant
58867	2549316	DOID:630	Disease	genetic disease
25909486	2502845	BTO:0000634	Tissue	integument
58325	2444254	DOID:331	Disease	central nervous system disease
54954	2363249	DOID:0014667	Disease	disease of metabolism
25909297	2333540	BTO:0000081	Tissue	reproductive system
25909611	2250789	BTO:0001085	Tissue	vascular system
2798456	2143813	BTO:0000751	Tissue	leukocyte
2798673	2139121	BTO:0001102	Tissue	blood vessel
2798882	2131642	BTO:0001485	Tissue	muscular system
25909514	2064343	BTO:0000753	Tissue	lymphoid tissue
2573935	2021891	BTO:0000887	Tissue	muscle
287447	2004128	GO:0005634	CellularComponent	nucleus
57894	1998115	DOID:1579	Disease	respiratory system disease
2798335	1938406	BTO:0000562	Tissue	heart
58197	1895928	DOID:2914	Disease	immune system disease
25909288	1895538	BTO:0000058	Tissue	alimentary canal
75037	1892913	DOID:0050828	Disease	artery disease
58888	1858420	DOID:655	Disease	inherited metabolic disorder
25909299	1852044	BTO:0000083	Tissue	female reproductive system
74976	1850127	DOID:0050687	Disease	cell type cancer
57916	1847923	DOID:17	Disease	musculoskeletal system disease
3028916	1809522	BTO:0000131	Tissue	blood plasma
25909421	1801828	BTO:0000431	Tissue	excretory gland
25909385	1766919	BTO:0000345	Tissue	digestive gland
57870	1754393	DOID:150	Disease	disease of mental health
74848	1714275	DOID:0050161	Disease	lower respiratory tract disease
25909457	1659428	BTO:0000511	Tissue	gastrointestinal tract
288424	1658691	GO:0043228	CellularComponent	membraneless organelle
288428	1645555	GO:0043232	CellularComponent	intracellular membraneless organelle
288829	1627522	GO:0071944	CellularComponent	cell periphery
59179	1608477	DOID:936	Disease	brain disease
58219	1581601	DOID:2978	Disease	carbohydrate metabolic disorder
58884	1574165	DOID:65	Disease	connective tissue disease
58538	1573636	DOID:4194	Disease	glucose metabolism disease
59177	1570442	DOID:934	Disease	viral infectious disease
25909413	1568756	BTO:0000416	Tissue	epithelium
2798460	1552414	BTO:0000759	Tissue	liver
58238	1504140	DOID:305	Disease	carcinoma
25909326	1491801	BTO:0000174	Tissue	embryonic structure
58941	1481099	DOID:74	Disease	hematopoietic system disease
2259	1476967	DOID:0081062	Disease	Diabetes Mellitus
25909331	1463558	BTO:0000203	Tissue	respiratory system
287413	1459699	GO:0005576	CellularComponent	extracellular region
2798670	1453642	BTO:0001096	Tissue	lymphoid cell
25909763	1446344	BTO:0001492	Tissue	limb
2798556	1445704	BTO:0000925	Tissue	nerve
59014	1444752	DOID:850	Disease	lung disease
2798470	1441582	BTO:0000775	Tissue	lymphocyte
25909706	1438193	BTO:0001369	Tissue	vertebrate muscular system
25909656	1401591	BTO:0001244	Tissue	urinary tract
2799850	1351113	BTO:0003092	Tissue	urinary system
25909496	1348009	BTO:0000648	Tissue	intestine
25909705	1330680	BTO:0001368	Tissue	thorax
2798764	1298753	BTO:0001243	Tissue	shoot
2798402	1230281	BTO:0000671	Tissue	kidney
2798463	1228529	BTO:0000763	Tissue	lung
79302	1227752	DOID:18	Disease	urinary system disease
103588	1213663	NR1H4	Gene	nuclear receptor subfamily 1 group H member 4
58851	1187209	DOID:612	Disease	primary immunodeficiency disease
2798302	1176481	BTO:0000478	Tissue	forebrain
