# Supplementary material
Source: Research Square preprint supplement (doi:10.21203/rs.3.rs-9060414/v1)
Supplement: Supplementary file 6 [file 896e36a910c24291c0e4666e.xlsx]

## Sheet: Supp_Table_3
Data Source	Triple contribution
AgeAnno	482931
AgeAnnoMO	16194
AgeXtend	54157
Aging Atlas	520
BindingDB	217516
BioGrakn	26791
CKG (Clinical Knowledge graph)	895499524
CROssBAR	3643551
CellAge	914
Chembl	32478
DRKG	4511603
DTInet (drug-target interaction)	784317
DigitalAgingAtlas	3100
DrugAge	585
Evolf	75791
FICE	1906
Flybase	89970
GPKG	2290695
GenDR	88
GeneAge	1803
Biogrid	203051
eSLDB	4183
HALD (Huma Aging and Longevity Knowledge graph)	56254
HMD HP	13184
Harmonizome	3723161
Hetionet	1857321
IMPPAT	99215
MGI(Mouse Genome Informatics)	37321
Literature	92
MetaboAge	535
MonarchKG	2002479
Mouse Net v2	698432
PharmKG	303868
Phytohub	1515
PrimeKG	3727679
SGD	73397
SMS	1034104
STITCH	68863357
STRING	29011966
TARKG	10297727
TTD(Therapeutic target database)	2014
Worm Interactome Database	176831
Wormbase	253430
YeastNet	694191
ZFIN (the Zebrafish Information Network)	136851
othersources	7687
species connection	31293404
iBKH	28662804
	1090970487
