# Supplementary material
Source: Research Square preprint supplement (doi:10.21203/rs.3.rs-9060414/v1)
Supplement: Supplementary file 7 [file 8a12c7c33f01c783569ea584.xlsx]

## Sheet: Supp_Table_2
Data Source	Link
AgeAnno	https://academic.oup.com/nar/article/51/D1/D805/6749541
AgeAnnoMO	https://relab.xidian.edu.cn/AgeAnnoMO
AgeXtend	https://www.nature.com/articles/s43587-024-00763-4
Aging Atlas	https://ngdc.cncb.ac.cn/aging/index
BindingDB	https://www.bindingdb.org/rwd/bind/index.jsp
BioGrakn	https://link.springer.com/chapter/10.1007/978-3-319-61566-0_28
CKG (Clinical Knowledge graph)	https://www.nature.com/articles/s41587-021-01145-6
CROssBAR	https://academic.oup.com/nar/article/49/16/e96/6310792
CellAge	https://academic.oup.com/nar/article/46/D1/D1083/4599180
Chembl	https://www.ebi.ac.uk/chembl/
DRKG	https://arxiv.org/abs/2212.03911
DTInet (drug-target interaction)	https://www.frontiersin.org/journals/bioinformatics/articles/10.3389/fbinf.2025.1649337/full
Digital Aging Atlas	https://pure.amsterdamumc.nl/en/publications/the-digital-ageing-atlas-integrating-the-diversity-of-age-related
DrugAge	https://genomics.senescence.info/drugs/
Evolf	Lab grown data
FICE (Functional Interactome of C. elegans)	https://biologydirect.biomedcentral.com/articles/10.1186/s13062-020-00271-6
Flybase	https://flybase.org/
GP-KG	http://sciencedirect.com/science/article/pii/S1532046422001496?via%3Dihub
GenDR	https://journals.plos.org/plosgenetics/article?id=10.1371/journal.pgen.1002834
GeneAge	https://academic.oup.com/nar/article/52/D1/D900/7337614
Biogrid	https://academic.oup.com/nar/article/34/suppl_1/D535/1133554
eSLDB (Eukaryotic Subcellular-Localization Database)	https://academic.oup.com/database/article/doi/10.1093/database/bau012/2633793
HALD (Huma Aging and Longevity Knowledge graph)	https://www.nature.com/articles/s41597-023-02781-0
HMD HP
Harmonizome	https://academic.oup.com/nar/article/53/D1/D1016/7905315
Hetionet	https://elifesciences.org/articles/26726
IMPPAT	https://www.nature.com/articles/s41598-018-22631-z
MGI(Mouse Genome Informatics)	https://pmc.ncbi.nlm.nih.gov/articles/PMC11075557/
Literature
MetaboAge	https://link.springer.com/article/10.1007/s10522-020-09892-w
MonarchKG	https://academic.oup.com/nar/article/52/D1/D938/7449493
Mouse Net v2	https://academic.oup.com/nar/article/44/D1/D848/2502647
PharmKG	https://academic.oup.com/bib/article/22/4/bbaa344/6042240
Phytohub (Version 1.4)	https://hal.science/hal-01697081/file/2017_Giacomoni_ICPH_Qu%C3%A9bec.pdf
PrimeKG	https://www.nature.com/articles/s41597-023-01960-3
SGD ( Saccharomyces Genome Database)	https://academic.oup.com/nar/article/26/1/73/2379479
SMS (Small moleculate suite)	https://www.sciencedirect.com/science/article/pii/S245194561930073X
STITCH (version5)	https://academic.oup.com/nar/article/44/D1/D380/2503089
STRING (version12)	https://string-db.org/
TARKG	https://academic.oup.com/bioinformatics/article/40/10/btae598/7818343
TTD(Therapeutic target database)	https://academic.oup.com/nar/article/52/D1/D1465/7275004
Worm Interactome Database (version 8)	https://interactome.dfci.harvard.edu/C_elegans/
Wormbase(version WS287)	https://www.wormbase.org/
YeastNet v3	https://www.inetbio.org/yeastnet/
ZFIN (the Zebrafish Information Network)	https://pubmed.ncbi.nlm.nih.gov/21036866/
othersources
species connection
iBKH	https://www.cell.com/iscience/fulltext/S2589-0042(23)00537-0
othersources	https://github.com/akshachrya/AyurvedicPlantClassifier/blob/main/data/english.xlsx
	https://github.com/alrichardbollans/PhytoChemicalDiversity/blob/master/collect_and_compile_data/collect_compound_data/outputs/all_species_compound_data.csv
	https://github.com/asgarhussain/phytochemicals/blob/main/phyto_chemicals.db
	https://github.com/kuralamuthan300/ayurvedic-medicine-catalogue/blob/master/Database.json
	https://github.com/petermr/CEVOpen/blob/master/Data%20Analysis/Plant_compound.csv
