# Supplementary material
Source: Research Square preprint supplement (doi:10.21203/rs.3.rs-9060414/v1)
Supplement: Supplementary file 8 [file 8cb61fa2766832fe0e52c2b3.xlsx]

## Sheet: Supp_Table_5
Aging
node id	count of edge	nodeID	nodeType	detailed_name
78	45769	GO:1111113	BiologicalProcess	epigenetic alterations
28	6089	GO:0007568	BiologicalProcess	aging
76	3633	GO:1111111	BiologicalProcess	genomic instability
61610	3512	C0027651	Disease	Neoplasm
79	3180	GO:1111114	BiologicalProcess	loss of proteostasis
60120	3044	C0006826	Disease	Malignant neoplastic disease
69991	2929	C1306459	Disease	Primary Malignant Neoplasm
60089	2587	C0006142	Disease	Malignant tumor of breast
68410	2532	C0678222	Disease	Breast carcinoma
1454	2497	TNF	Gene	tumor necrosis factor
61607	2461	C0027627	Disease	Metastasis
69673	2451	C1269955	Disease	Tumor Cell Invasion
68338	2263	C0596263	Disease	Carcinogenesis
1326	2214	IL6	Gene	interleukin 6
809	2174	D009369	Disease	Neoplasms
74086	2116	C2239176	Disease	Hepatocellular carcinoma
60304	2089	C0009402	Disease	Colorectal carcinoma
689	2052	D003643	Disease	Death
1475	1823	VEGFA	Gene	vascular endothelial growth factor A
66939	1781	C0376358	Disease	Malignant tumor of prostate
68370	1748	C0600139	Disease	Prostate carcinoma
70	1734	GO:0090398	BiologicalProcess	cellular senescence
64402	1673	C0242379	Disease	Lung cancer
68420	1646	C0684249	Disease	Lung carcinoma
82	1646	GO:1111117	BiologicalProcess	stem cell exhaustion
63449	1602	C0178874	Disease	Tumor Progression
1325	1593	IL1B	Gene	interleukin 1 beta
69992	1585	C1306460	Disease	Primary malignant neoplasm of lung
1322	1539	IL10	Gene	interleukin 10
61404	1508	C0024623	Disease	Gastric cancer
68482	1493	C0699791	Disease	Gastric carcinoma
60149	1492	C0007131	Disease	Non-small cell lung carcinoma
57313	1415	TGFB1	Gene	transforming growth factor beta 1
59840	1407	C0002395	Disease	Alzheimer disease
60796	1406	C0017636	Disease	Glioblastoma
70868	1406	C1621958	Disease	Glioblastoma multiforme
57041	1392	PIK3CA	Gene	phosphatidylinositol-4,5-bisphosphate 3-kinase catalytic subunit alpha
1254	1355	EGFR	Gene	epidermal growth factor receptor
61441	1353	C0025202	Disease	Melanoma
1196	1351	BCL2	Gene	BCL2 apoptosis regulator
56713	1348	IFNG	Gene	interferon gamma
1216	1334	CDKN2A	Gene	cyclin dependent kinase inhibitor 2A
60445	1331	C0011860	Disease	Type 2 diabetes mellitus
1394	1302	PTEN	Gene	phosphatase and tensin homolog
1176	1297	AKT1	Gene	AKT serine/threonine kinase 1
60797	1290	C0017638	Disease	Glioma
82239	1287	PPIAP10	Gene	peptidylprolyl isomerase A pseudogene 10
70639	1278	C1458155	Disease	Breast neoplasm
56421	1272	CTNNB1	Gene	catenin beta 1
60133	1251	C0007102	Disease	Colon cancer
61283	1245	C0023467	Disease	Acute myeloid leukemia
59962	1240	C0003873	Disease	Rheumatoid arthritis
60442	1231	C0011849	Disease	Diabetes mellitus
61674	1228	C0028754	Disease	Obesity
56886	1204	MMP9	Gene	matrix metallopeptidase 9
68481	1198	C0699790	Disease	Carcinoma of colon
79397	1193	C4721610	Disease	Ovarian carcinoma
1026	1188	DOID:0081062	Disease	Diabetes Mellitus
1178	1185	ALB	Gene	albumin
62146	1176	C0036341	Disease	Schizophrenia
637	1174	D000544	Disease	Alzheimer Disease
68460	1174	C0686619	Disease	Metastatic malignant neoplasm in the lymph nodes
74993	1164	C2939419	Disease	Metastatic malignant neoplasm
1239	1154	CXCL8	Gene	C-X-C motif chemokine ligand 8
64094	1154	C0235974	Disease	Carcinoma of pancreas
65735	1139	C0278878	Disease	Adult glioblastoma
1319	1139	IGF1	Gene	insulin like growth factor 1
65856	1138	C0280474	Disease	Childhood Glioblastoma
66822	1138	C0346647	Disease	Malignant tumor of pancreas
60132	1132	C0007097	Disease	Carcinoma
61641	1127	C0027819	Disease	Neuroblastoma
60153	1125	C0007137	Disease	Squamous cell carcinoma
69473	1109	C1140680	Disease	Ovarian cancer
61060	1109	C0020538	Disease	Hypertensive disorder
57261	1105	STAT3	Gene	signal transducer and activator of transcription 3
69319	1099	C0919267	Disease	Ovarian neoplasm
57098	1099	PTGS2	Gene	prostaglandin-endoperoxide synthase 2
1452	1098	TLR4	Gene	toll like receptor 4
78149	1094	C4086165	Disease	Childhood Neuroblastoma
1187	1089	APOE	Gene	apolipoprotein E
65812	1060	C0279702	Disease	Clear cell carcinoma of kidney
1166	1058	ACE	Gene	angiotensin I converting enzyme
768	1056	D007249	Disease	Inflammation
81	1053	GO:1111116	BiologicalProcess	mitochondrial dysfunction
59783	1053	C0001418	Disease	Adenocarcinoma
62989	1049	C0152013	Disease	Lung adenocarcinoma
56308	1046	CCL2	Gene	C-C motif chemokine ligand 2
765	1042	D007239	Disease	Infections
1262	1031	ESR1	Gene	estrogen receptor 1
59984	1027	C0004153	Disease	Atherosclerosis
1361	1020	MTOR	Gene	mechanistic target of rapamycin kinase
1311	1012	HIF1A	Gene	hypoxia inducible factor 1 subunit alpha
82116	1012	PIK3CG	Gene	phosphatidylinositol-4,5-bisphosphate 3-kinase catalytic subunit gamma
59952	1000	C0003850	Disease	Arteriosclerosis disorder
82114	995	PIK3CB	Gene	phosphatidylinositol-4,5-bisphosphate 3-kinase catalytic subunit beta
59976	993	C0004096	Disease	Asthma
61268	952	C0023418	Disease	Leukemia
60151	950	C0007134	Disease	Renal cell carcinoma
1423	940	SIRT1	Gene	sirtuin 1
1341	939	LEP	Gene	leptin
