# Supplementary material
Source: Research Square preprint supplement (doi:10.21203/rs.3.rs-9060414/v1)
Supplement: Supplementary file 9 [file 9a2fee73ac35eaa78770d217.xlsx]

## Sheet: Supp_Table_10
doi	title	authors	category	posted_date	version	link	abstract	Hypothesis Questions	Hypothesis Questions Text	Q1	Q2	Q3
10.1101/2025.02.25.639746	Endogenously generated Dutch-type AÃƒÅ½Ã‚Â² nonfibrillar aggregates dysregulate presynaptic neurotransmission in the absence of detectable inflammation	Castranio, E. L.; Varghese, M.; Argyrousi, E. K.; Tripathi, K.; Soderberg, L.; Bresnahan, E.; Lerner, D.; Garretti, F.; Zhang, H.; van de Loo, J.; Stimpson, C.; Talty, R.; Glabe, C.; Levy, E.; Wang, M.; Ilkov, M.; Zhang, B.; Lannfelt, L.; Guerin, B.; Lubell, W. D.; Rahimipour, S.; Dickstein, D. L.; Gandy, S. E.; Arancio, O.; Ehrlich, M. E.	neuroscience	2025-02-03	6	https://www.biorxiv.org/content/10.1101/2025.02.25.639746v6	APPE693Q transgenic mice develop aging-related learning deficits and accumulate endogenously generated nonfibrillar aggregates of A{beta} (NFA-A{beta}) and APP -carboxy terminal fragments. The APPE693Q mutation disrupts amyloid fibril formation, and no plaques develop in these mice. In the current study, the aging-related accumulation of NFA-A{beta} in APPE693Q mice was revealed by A11 immunohist…	["I hypothesise that endogenously generated nonfibrillar AÃƒÅ½Ã‚Â² aggregates in APPE693Q mice reduce mitochondrial complex I activity.", "I hypothesise that nonfibrillar AÃƒÅ½Ã‚Â² aggregates in APPE693Q mice impair synaptic vesicle replenishment independently of inflammation.", "I hypothesise that reduced mitochondrial complex I activity in APPE693Q mice contributes to learning deficits."]	Q1: I hypothesise that endogenously generated nonfibrillar AÃƒÅ½Ã‚Â² aggregates in APPE693Q mice reduce mitochondrial complex I activity. Q2: I hypothesise that nonfibrillar AÃƒÅ½Ã‚Â² aggregates in APPE693Q mice impair synaptic vesicle replenishment independently of inflammation. Q3: I hypothesise that reduced mitochondrial complex I activity in APPE693Q mice contributes to learning deficits.	I hypothesise that endogenously generated nonfibrillar AÃƒÅ½Ã‚Â² aggregates in APPE693Q mice reduce mitochondrial complex I activity.	I hypothesise that nonfibrillar AÃƒÅ½Ã‚Â² aggregates in APPE693Q mice impair synaptic vesicle replenishment independently of inflammation.	I hypothesise that reduced mitochondrial complex I activity in APPE693Q mice contributes to learning deficits.
10.1101/2024.04.19.590241	The energetic stress cytokine GDF15 is elevated in the context of chronic and acute psychosocial stress	Huang, Q.; Monzel, A. S.; Rausser, S.; Haahr, R.; Indik, C. E.; Savin, M. J.; Bobba-Alves, N.; Liu, C. C.; Devine, J.; Thompson, E.; Kelly, C.; Kurade, M. S.; Michelson, J.; Li, S.; Engelstad, K.; Lauriola, V.; Marsland, A. L.; Kaufman, B. A.; St-Onge, M.-P.; Sloan, R.; Juster, R.-P.; Gouspillou, G.; Hirano, M.; Picard, M.; Belsky, D. W.; Trumpff, C.	physiology	14/07/2025	6	https://www.biorxiv.org/content/10.1101/2024.04.19.590241v6	Growth Differentiation Factor 15 (GDF15) is a protein that reflects mitochondrial energetic stress and is linked to physical and mental health symptoms, aging, and mortality. Here, we tested the hypothesis that GDF15 is a stress-responsive biomarker through a series of observational and experimental studies. We report four main findings. First, in the UK Biobank (n=53,026) and Framingham Heart St…	["I hypothesise that chronic psychosocial stress accelerates biological aging as measured by epigenetic clocks.", "I hypothesise that acute social-evaluative stress increases plasma GDF15 levels within minutes.", "I hypothesise that elevated GDF15 levels are associated with increased risk of depression and anxiety symptoms."]	Q1: I hypothesise that chronic psychosocial stress accelerates biological aging as measured by epigenetic clocks. Q2: I hypothesise that acute social-evaluative stress increases plasma GDF15 levels within minutes. Q3: I hypothesise that elevated GDF15 levels are associated with increased risk of depression and anxiety symptoms.	I hypothesise that chronic psychosocial stress accelerates biological aging as measured by epigenetic clocks.	I hypothesise that acute social-evaluative stress increases plasma GDF15 levels within minutes.	I hypothesise that elevated GDF15 levels are associated with increased risk of depression and anxiety symptoms.
10.1101/2023.12.01.567841	Cortical sensory aging is layer-specific	Liu, P.; Doehler, J.; Henschke, J. U.; Northall, A.; Serian, A.; Loaiza-Carvajal, L. C.; Budinger, E.; Schwarzkopf, D. S.; Speck, O.; Pakan, J. M. P.; Kuehn, E.	neuroscience	2025-05-03	6	https://www.biorxiv.org/content/10.1101/2023.12.01.567841v6	The segregation of processes into cortical layers is a convergent feature in animal evolution. However, how changes in the cortical layer architecture interact with sensory system function and dysfunction remains unclear. We conducted functional and structural layer-specific in-vivo 7T-MRI of the primary somatosensory cortex in two cohorts of healthy younger and older adults. Input layer IV is en…	["I hypothesise that increased myelination in layer IV of the somatosensory cortex in older adults correlates with reduced sensory processing speed.", "I hypothesise that increased parvalbumin expression in older mice compensates for age-related increases in sensory-evoked neuronal activity.", "I hypothesise that age-related cortical thinning in deep layers is directly caused by reduced neuronal …	Q1: I hypothesise that increased myelination in layer IV of the somatosensory cortex in older adults correlates with reduced sensory processing speed. Q2: I hypothesise that increased parvalbumin expression in older mice compensates for age-related increases in sensory-evoked neuronal activity. Q3: I hypothesise that age-related cortical thinning in deep layers is directly caused by reduced neuro…	I hypothesise that increased myelination in layer IV of the somatosensory cortex in older adults correlates with reduced sensory processing speed.	I hypothesise that increased parvalbumin expression in older mice compensates for age-related increases in sensory-evoked neuronal activity.	I hypothesise that age-related cortical thinning in deep layers is directly caused by reduced neuronal density.
10.1101/2024.01.06.574490	Capsaicin acts as a novel NRF2 agonist to suppress ethanol induced gastric mucosa oxidative damage by directly disrupting the KEAP1-NRF2 interaction	Gao, X.; Guo, W.; Liu, P.; Yuwen, M.; Liu, Z.; Tan, R.; Liu, K.; Yang, Z.; Ba, J.; Bai, X.; Shama, S.; Tang, C.; Miao, K.; Pei, H.; Liu, L.; Zhu, C.; Wang, T.; Zhang, B.; Kang, J.	cell biology	23/01/2025	5	https://www.biorxiv.org/content/10.1101/2024.01.06.574490v5	Excessive drinking poses serious health risks and is closely associated with oxidative damage. The KEAP1-NRF2-ARE axis serves as the primary antioxidant system. However, the existing small molecule inhibitors are all covalently bound to KEAP1, meaning that once bound, they are not easily dissociated, while continuous inhibition of KEAP1 exhibits severe side effects. In this study, BLI, CETSA, Pul…	["I hypothesise that capsaicin administration reduces age-related oxidative damage in gastric mucosa.", "I hypothesise that capsaicin treatment enhances NRF2 activity in aged cells.", "I hypothesise that capsaicin administration improves mitochondrial function in aged gastric tissue."]	Q1: I hypothesise that capsaicin administration reduces age-related oxidative damage in gastric mucosa. Q2: I hypothesise that capsaicin treatment enhances NRF2 activity in aged cells. Q3: I hypothesise that capsaicin administration improves mitochondrial function in aged gastric tissue.	I hypothesise that capsaicin administration reduces age-related oxidative damage in gastric mucosa.	I hypothesise that capsaicin treatment enhances NRF2 activity in aged cells.	I hypothesise that capsaicin administration improves mitochondrial function in aged gastric tissue.
10.1101/2024.01.31.578137	The heartbeat-evoked potential in young and older adults during attention orienting	Aprile, F.; Simoes, M.; Henriques, J.; de Carvalho, P.; Castelo-Branco, M.; Sel, A.; Ribeiro, M. J.	neuroscience	2025-08-04	5	https://www.biorxiv.org/content/10.1101/2024.01.31.578137v5	Cardiac cycle duration, or interbeat interval (IBI), is the period from one heartbeat to the next. IBI changes from cycle to cycle. Periods with longer IBI are associated with higher sensitivity to external sensory stimuli (exteroception). Warning cues induce a state of attentive anticipation characterized by an increase in IBI (anticipatory cardiac deceleration) and faster reaction times. Ageing…	["I hypothesise that increased interbeat interval (IBI) in older adults is associated with reduced heartbeat-evoked potential (HEP) amplitude.", "I hypothesise that spontaneous IBI fluctuations modulate HEP amplitude in older adults more than in younger adults.", "I hypothesise that HEP amplitude is a predictor of reaction time in older adults, independent of IBI."]	Q1: I hypothesise that increased interbeat interval (IBI) in older adults is associated with reduced heartbeat-evoked potential (HEP) amplitude. Q2: I hypothesise that spontaneous IBI fluctuations modulate HEP amplitude in older adults more than in younger adults. Q3: I hypothesise that HEP amplitude is a predictor of reaction time in older adults, independent of IBI.	I hypothesise that increased interbeat interval (IBI) in older adults is associated with reduced heartbeat-evoked potential (HEP) amplitude.	I hypothesise that spontaneous IBI fluctuations modulate HEP amplitude in older adults more than in younger adults.	I hypothesise that HEP amplitude is a predictor of reaction time in older adults, independent of IBI.
10.1101/2024.10.08.617286	DNA methylation of transposons pattern aging differences across a diverse cohort of dogs from the Dog Aging Project	Mariner, B. L.; McCoy, B. M.; Greenier, A.; Brassington, L.; Slikas, E.; Adjangba, C.; Marye, A.; Harrison, B. R.; Bamberger, T.; Algavi, Y.; Muller, E.; Harris, A.; Rout, E.; The Dog Aging Project Consortium, ; Avery, A.; Borenstein, E.; Promislow, D.; Snyder-Mackler, N.	genomics	13/01/2025	5	https://www.biorxiv.org/content/10.1101/2024.10.08.617286v5	Within a species, larger individuals often have shorter lives and higher rates of age-related disease. Despite this well-known link, we still know little about underlying age-related epigenetic differences, which could help us better understand inter-individual variation in aging and the etiology, onset, and progression of age-associated disease. Dogs exhibit this negative correlation between siz…	["I hypothesise that increased LINE1 hypomethylation with age is associated with a shorter lifespan in dogs.", "I hypothesise that greater age-related LINE1 hypomethylation in larger dog breeds contributes to their increased incidence of age-related disease.", "I hypothesise that accelerated age-related LINE1 hypomethylation in golden retrievers predicts a higher risk of hematopoietic cancers."]	Q1: I hypothesise that increased LINE1 hypomethylation with age is associated with a shorter lifespan in dogs. Q2: I hypothesise that greater age-related LINE1 hypomethylation in larger dog breeds contributes to their increased incidence of age-related disease. Q3: I hypothesise that accelerated age-related LINE1 hypomethylation in golden retrievers predicts a higher risk of hematopoietic cancers.	I hypothesise that increased LINE1 hypomethylation with age is associated with a shorter lifespan in dogs.	I hypothesise that greater age-related LINE1 hypomethylation in larger dog breeds contributes to their increased incidence of age-related disease.	I hypothesise that accelerated age-related LINE1 hypomethylation in golden retrievers predicts a higher risk of hematopoietic cancers.
10.1101/2023.12.08.570799	Explaining tip-of-the-tongue experiences in older adults: The role of brain-based and cardiorespiratory fitness factors	Rahman, F.; Tsvetanov, K. A.; Feron, J.; Mullinger, K.; Joyce, K.; Gilani, A.; Fernandes, E. G.; Wetterlin, A.; Wheeldon, L. R.; Lucas, S. J. E.; Segaert, K.	neuroscience	23/06/2025	5	https://www.biorxiv.org/content/10.1101/2023.12.08.570799v5	Cognitive decline associated with healthy ageing is multifactorial: brain-based and lifestyle factors uniquely and jointly contribute to distinct neurocognitive trajectories of ageing. To evaluate existing models of neurocognitive ageing such as compensation, maintenance, or reserve, we explore how various known brain-based and cardiorespiratory fitness factors intersect to better understand cogn…	[]	Q1: I hypothesise that higher cardiorespiratory fitness in older adults will correlate with reduced tip-of-the-tongue experiences. Q2: I hypothesise that increased functional activation in language networks will predict fewer word-finding failures in older adults. Q3: I hypothesise that age-related atrophy in non-language regions will be associated with increased tip-of-the-tongue rates.	I hypothesise that higher cardiorespiratory fitness in older adults will correlate with reduced tip-of-the-tongue experiences.	I hypothesise that increased functional activation in language networks will predict fewer word-finding failures in older adults.	I hypothesise that age-related atrophy in non-language regions will be associated with increased tip-of-the-tongue rates.
10.1101/2023.11.27.568184	Rate of brain aging associates with future executive function in Asian children and older adults	Cheng, S. F.; Yue, W. L.; Ng, K. K.; Qian, X.; Liu, S.; Tan, T. W. K.; Nguyen, K.-N.; Leong, R. L. F.; Hilal, S.; Cheng, C.-Y.; Tan, A. P.; Law, E. C.; Gluckman, P. D.; Chen, C. L.-H.; Chong, Y. S.; Meaney, M. J.; Chee, M.; Yeo, B. T. T.; Zhou, J. H.	neuroscience	2025-02-01	5	https://www.biorxiv.org/content/10.1101/2023.11.27.568184v5	Brain age has emerged as a powerful tool to understand neuroanatomical aging and its link to health outcomes like cognition. However, there remains a lack of studies investigating the rate of brain aging and its relationship to cognition. Furthermore, most brain age models are trained and tested on cross-sectional data from primarily Caucasian, adult participants. It is thus unclear how well thes…	["I hypothesise that a faster rate of brain age gap increase in children predicts poorer future executive function.", "I hypothesise that a faster rate of brain age gap increase in older adults predicts poorer future executive function."]	Q1: I hypothesise that a faster rate of brain age gap increase in children predicts poorer future executive function. Q2: I hypothesise that a faster rate of brain age gap increase in older adults predicts poorer future executive function.	I hypothesise that a faster rate of brain age gap increase in children predicts poorer future executive function.	I hypothesise that a faster rate of brain age gap increase in older adults predicts poorer future executive function.
10.1101/2024.01.04.574215	Extracellular matrix and microglial regulation of cognitive aging	Gray, D. T.; Guitierrez, A.; Jami-Alahmadi, Y.; Pandey, V.; Pan, L.; Zhang, Y. T.; Wohlschlegel, J. A.; McDevitt, R.; De Biase, L. M.	neuroscience	25/08/2025	4	https://www.biorxiv.org/content/10.1101/2024.01.04.574215v4	Synapse dysfunction is tightly linked to cognitive changes during aging. Emerging evidence suggests that microglia and the extracellular matrix (ECM) can potently regulate synapse integrity and plasticity. Yet the brain ECM, and its relationship with microglia, synapses, and cognition during aging remains virtually unexplored. Using ECM-optimized proteomic workflows and histological analyses, we …	["I hypothesise that increased hyaluronan in basal ganglia nuclei correlates with worse cognitive performance in aged mice.", "I hypothesise that impaired microglial interaction with ECM in aged mice leads to local ECM accumulation and cognitive decline.", "I hypothesise that restoring microglial ECM interaction capacity in aged mice improves cognitive function."]	Q1: I hypothesise that increased hyaluronan in basal ganglia nuclei correlates with worse cognitive performance in aged mice. Q2: I hypothesise that impaired microglial interaction with ECM in aged mice leads to local ECM accumulation and cognitive decline. Q3: I hypothesise that restoring microglial ECM interaction capacity in aged mice improves cognitive function.	I hypothesise that increased hyaluronan in basal ganglia nuclei correlates with worse cognitive performance in aged mice.	I hypothesise that impaired microglial interaction with ECM in aged mice leads to local ECM accumulation and cognitive decline.	I hypothesise that restoring microglial ECM interaction capacity in aged mice improves cognitive function.
10.1101/2024.11.19.624350	Ovarian germline stem cell dedifferentiation is cytoneme dependent	Sutcliffe, C.; Nandy, N.; Revici, R.; Johnson, H.; Habib, S. J.; Ashe, H. L.; Wilcockson, S. G.	developmental biology	2025-08-08	4	https://www.biorxiv.org/content/10.1101/2024.11.19.624350v4	Progenitor cell dedifferentiation is important for stem cell maintenance during tissue repair and age-related stem cell decline. Here, we use the Drosophila ovary as a model to study the role of cytonemes in BMP signalling-directed germline stem cell (GSC) maintenance and dedifferentiation of germ cells to GSCs. We provide evidence that differentiating germ cell cysts extend longer cytonemes that…	["I hypothesise that disrupting cytoneme function in aging Drosophila ovaries will accelerate germline stem cell decline.", "I hypothesise that enhancing cytoneme formation in aging Drosophila ovaries will improve germline stem cell maintenance and dedifferentiation.", "I hypothesise that cytoneme-mediated BMP signalling is essential for reversing age-related germline stem cell loss."]	Q1: I hypothesise that disrupting cytoneme function in aging Drosophila ovaries will accelerate germline stem cell decline. Q2: I hypothesise that enhancing cytoneme formation in aging Drosophila ovaries will improve germline stem cell maintenance and dedifferentiation. Q3: I hypothesise that cytoneme-mediated BMP signalling is essential for reversing age-related germline stem cell loss.	I hypothesise that disrupting cytoneme function in aging Drosophila ovaries will accelerate germline stem cell decline.	I hypothesise that enhancing cytoneme formation in aging Drosophila ovaries will improve germline stem cell maintenance and dedifferentiation.	I hypothesise that cytoneme-mediated BMP signalling is essential for reversing age-related germline stem cell loss.
10.1101/2024.09.20.614161	hiPSC-derived astrocytes from individuals with schizophrenia induce a dystrophic phenotype in microglial-like cells	Cardozo, P. L.; Lee, C.-Y.; Lacerda, J. P. S.; Fahel, J. S.; Trindade, P.; Vitoria, G.; Chicaybam, L.; Cordeiro, R. C.; de Faria, I. J. S.; Silva, N. C.; Todjro, Y. M. H.; Maciel, J. C. d. P.; Bonamino, M. H.; Vieira, L. B.; Cruz, B. F.; Nicolato, R.; Brennand, K. J.; Rehen, S. K.; Ribeiro, F. M.	neuroscience	16/04/2025	4	https://www.biorxiv.org/content/10.1101/2024.09.20.614161v4	Neuroinflammation, particularly astrocyte reactivity, is increasingly linked to schizophrenia (SCZ). Yet, the crosstalk between astrocytes and microglia in SCZ, especially under pro-inflammatory conditions, remains unclear. Here, we employed human induced-pluripotent stem cells to compare how astrocytes from five age-matched individuals with SCZ and five neurotypical controls, upon stimulation wi…	["I hypothesise that reactive SCZ astrocytes induce a dystrophic phenotype in microglial-like cells by downregulating immune cell proliferation and activation pathways.", "I hypothesise that reactive SCZ astrocytes impair microglial-like cell synaptoneurosome phagocytosis through secreted factors.", "I hypothesise that reactive SCZ astrocytes reduce CX3CR1 plasma membrane levels in microglial-lik…	Q1: I hypothesise that reactive SCZ astrocytes induce a dystrophic phenotype in microglial-like cells by downregulating immune cell proliferation and activation pathways. Q2: I hypothesise that reactive SCZ astrocytes impair microglial-like cell synaptoneurosome phagocytosis through secreted factors. Q3: I hypothesise that reactive SCZ astrocytes reduce CX3CR1 plasma membrane levels in microglial…	I hypothesise that reactive SCZ astrocytes induce a dystrophic phenotype in microglial-like cells by downregulating immune cell proliferation and activation pathways.	I hypothesise that reactive SCZ astrocytes impair microglial-like cell synaptoneurosome phagocytosis through secreted factors.	I hypothesise that reactive SCZ astrocytes reduce CX3CR1 plasma membrane levels in microglial-like cells, inhibiting their migration.
10.1101/2024.10.21.619470	T Cell Receptor Diversity, Cancer and Sex: Insights from 30,000 TCRÃƒÅ½Ã‚Â² Repertoires	Zahid, H. J.; Taniguchi, R.; Noceda, M. G.; Robbins, H.; Greissl, J.	cancer biology	15/04/2025	4	https://www.biorxiv.org/content/10.1101/2024.10.21.619470v4	Cancer is a widespread disease claiming millions of lives each year, yet the relationship between cancer risk and age-related immune system decline (i.e., immunosenescence), specifically the ability of T cells to detect and eliminate cancerous cells, remains poorly understood. Here we analyze T cell receptor (TCR) {beta} repertoires from [~]30,000 subjects demonstrating that TCR diversity-- a key…	["I hypothesise that reduced T cell receptor diversity directly increases cancer incidence in males compared to females.", "I hypothesise that delayed immunosenescence in females contributes to their lower cancer incidence.", "I hypothesise that declining T cell receptor diversity with age is a primary driver of cancer immune evasion."]	Q1: I hypothesise that reduced T cell receptor diversity directly increases cancer incidence in males compared to females. Q2: I hypothesise that delayed immunosenescence in females contributes to their lower cancer incidence. Q3: I hypothesise that declining T cell receptor diversity with age is a primary driver of cancer immune evasion.	I hypothesise that reduced T cell receptor diversity directly increases cancer incidence in males compared to females.	I hypothesise that delayed immunosenescence in females contributes to their lower cancer incidence.	I hypothesise that declining T cell receptor diversity with age is a primary driver of cancer immune evasion.
10.1101/2023.06.23.546234	Overexpression of the receptor-like kinase BIR1 gene causes SOBIR1- and EDS1-dependent cell death phenotypes in Arabidopsis	Guzman-Benito, I.; Robinson, C.; Punzon, I.; Llave, C.	plant biology	2025-10-01	4	https://www.biorxiv.org/content/10.1101/2023.06.23.546234v4	The receptor-like kinase BAK1-INTERACTING RECEPTOR-LIKE KINASE 1 (BIR1) functions as a negative regulator of multiple resistance signaling pathways in Arabidopsis thaliana. Previous studies showed that loss of BIR1 function leads to extensive cell death and activation of constitutive immune responses. Here, we use a dexamethasone (DEX)-inducible expression system to investigate the impact of BIR1…	[]	Q1: I hypothesise that BIR1 overexpression induces cellular senescence phenotypes in Arabidopsis. Q2: I hypothesise that EDS1 and SOBIR1 are required for BIR1 overexpression-induced cell death. Q3: I hypothesise that BIR1 homeostasis is critical for preventing cell death and immune activation.	I hypothesise that BIR1 overexpression induces cellular senescence phenotypes in Arabidopsis.	I hypothesise that EDS1 and SOBIR1 are required for BIR1 overexpression-induced cell death.	I hypothesise that BIR1 homeostasis is critical for preventing cell death and immune activation.
10.1101/2024.09.02.610398	Circular RNAs accumulate in ageing human placental tissue and in stillbirth, leading to DNA damage and cellular senescence	Arthurs, A. L.; Jackson, M. R.; McCullough, D.; SCOTT, H.; Barnett, C. P.; Webb, S. T.; Smith, M. D.; Jankovic-Karasoulos, T.; Dekker, G. A.; Roberts, C. T.	molecular biology	2025-03-06	4	https://www.biorxiv.org/content/10.1101/2024.09.02.610398v4	Structured AbstractO_ST_ABSBackgroundC_ST_ABSUnexplained stillbirth may occur due to premature placental ageing, with unexpected deterioration of placental function for gestational age. Circular RNAs (circRNAs) are enzyme-resistant RNA molecules that accumulate in ageing tissues. Furthermore, circRNAs bind gDNA directly, forming circRNA:DNA complexes which can induce DNA breaks and genomic instab…	[]	Q1: I hypothesise that increased circ_0000284 abundance in placental cells directly causes DNA damage and cellular senescence. Q2: I hypothesise that reduced RNase H1 abundance in stillbirth placentae leads to circRNA accumulation and subsequent DNA damage. Q3: I hypothesise that elevated circRNA levels in maternal blood at 16 weeks gestation predict stillbirth risk.	I hypothesise that increased circ_0000284 abundance in placental cells directly causes DNA damage and cellular senescence.	I hypothesise that reduced RNase H1 abundance in stillbirth placentae leads to circRNA accumulation and subsequent DNA damage.	I hypothesise that elevated circRNA levels in maternal blood at 16 weeks gestation predict stillbirth risk.
10.1101/2020.08.03.233874	The ESCRT protein CHMP5 restricts bone formation by controlling endolysosome-mitochondrion-mediated cell senescence	Zhang, F.; Wang, Y.; Zhang, L.; Wang, C.; Chen, D.; Liu, H.; Xu, R.; Haynes, C. M.; Shim, J.-H.; Ge, X.	cell biology	27/03/2025	4	https://www.biorxiv.org/content/10.1101/2020.08.03.233874v4	The dysfunction of the cellular endolysosomal pathway, such as in lysosomal storage diseases, can cause severe musculoskeletal disorders. However, how endolysosomal dysfunction causes musculoskeletal abnormalities remains poorly understood, limiting therapeutic options. Here, we report that CHMP5, a member of the endosomal sorting complex required for transport (ESCRT)-III protein family, is esse…	["I hypothesise CHMP5 deficiency in osteogenic cells increases bone formation by reducing cellular senescence.", "I hypothesise CHMP5 overexpression in osteogenic cells decreases VPS4A, leading to increased senescence and reduced bone formation.", "I hypothesise senolytic treatment reverses bone abnormalities in CHMP5 deficient mice by eliminating senescent osteogenic cells."]	Q1: I hypothesise CHMP5 deficiency in osteogenic cells increases bone formation by reducing cellular senescence. Q2: I hypothesise CHMP5 overexpression in osteogenic cells decreases VPS4A, leading to increased senescence and reduced bone formation. Q3: I hypothesise senolytic treatment reverses bone abnormalities in CHMP5 deficient mice by eliminating senescent osteogenic cells.	I hypothesise CHMP5 deficiency in osteogenic cells increases bone formation by reducing cellular senescence.	I hypothesise CHMP5 overexpression in osteogenic cells decreases VPS4A, leading to increased senescence and reduced bone formation.	I hypothesise senolytic treatment reverses bone abnormalities in CHMP5 deficient mice by eliminating senescent osteogenic cells.
10.1101/2023.10.02.560545	Chronic RNA G-quadruplex Accumulation in Aging and Alzheimer's Disease	Kallweit, L.; Saternos, H.; Hamlett, E. D.; Gilmore, A.; Granholm, A.-C.; Horowitz, S.	neuroscience	13/01/2025	4	https://www.biorxiv.org/content/10.1101/2023.10.02.560545v4	INTRODUCTIONAs the world population ages, new molecular targets in aging and Alzheimers Disease (AD) are needed to combat the expected influx of new AD cases. Until now, the role of RNA structure in aging and neurodegeneration has largely remained unexplored. METHODSIn this study, we examined human hippocampal postmortem tissue for the formation of RNA G-quadruplexes (rG4s) in aging and AD. RESUL…	["I hypothesise that chronic RNA G-quadruplex accumulation directly causes tau aggregation in neurons.", "I hypothesise that reducing RNA G-quadruplex formation will decrease phospho-tau accumulation in aging brains.", "I hypothesise that APOE genotype influences the rate of RNA G-quadruplex accumulation in the aging hippocampus."]	Q1: I hypothesise that chronic RNA G-quadruplex accumulation directly causes tau aggregation in neurons. Q2: I hypothesise that reducing RNA G-quadruplex formation will decrease phospho-tau accumulation in aging brains. Q3: I hypothesise that APOE genotype influences the rate of RNA G-quadruplex accumulation in the aging hippocampus.	I hypothesise that chronic RNA G-quadruplex accumulation directly causes tau aggregation in neurons.	I hypothesise that reducing RNA G-quadruplex formation will decrease phospho-tau accumulation in aging brains.	I hypothesise that APOE genotype influences the rate of RNA G-quadruplex accumulation in the aging hippocampus.
10.1101/2024.05.27.596069	Cognitive reserves hold back age-related upregulation of neural activities in speech-in-noise perception	Zhang, L.; Ross, B.; Du, Y.; Alain, C.	neuroscience	16/06/2025	4	https://www.biorxiv.org/content/10.1101/2024.05.27.596069v4	During cognitive tasks, increased frontoparietal neural activity and functional connectivity are commonly observed in older adults. Cognitive reserves accrued from positive life choices can provide additional neural resources to cope with aging. However, how cognitive reserves interact with upregulated neural activity in older adults is poorly understood. We measured brain activity with fMRI duri…	["I hypothesise that older musicians will show less age-related increase in frontoparietal neural activity during speech-in-noise tasks than older non-musicians.", "I hypothesise that greater cognitive reserve from musical training will correlate with reduced upregulation of auditory dorsal stream functional connectivity in older adults.", "I hypothesise that older musicians will exhibit more you…	Q1: I hypothesise that older musicians will show less age-related increase in frontoparietal neural activity during speech-in-noise tasks than older non-musicians. Q2: I hypothesise that greater cognitive reserve from musical training will correlate with reduced upregulation of auditory dorsal stream functional connectivity in older adults. Q3: I hypothesise that older musicians will exhibit more…	I hypothesise that older musicians will show less age-related increase in frontoparietal neural activity during speech-in-noise tasks than older non-musicians.	I hypothesise that greater cognitive reserve from musical training will correlate with reduced upregulation of auditory dorsal stream functional connectivity in older adults.	I hypothesise that older musicians will exhibit more youth-like fine spatial patterns of functional connectivity in auditory dorsal regions than older non-musicians.
10.1101/2025.07.10.664052	Cdc42 Partitioning by Chaperone Ydj1 During Asymmetric Division and Aging in Yeast	Kang, P. J.; Mazak, H.; Lee, S. S.; Park, H.-O.	cell biology	15/07/2025	4	https://www.biorxiv.org/content/10.1101/2025.07.10.664052v4	The small GTPase Cdc42 is a central regulator of cell polarity, but it is often hyperactivated in aged cells, contributing to senescence and aging in both yeast and animal cells. Yet, the mechanisms underlying its age-related upregulation remain poorly understood. Here, we examine how Cdc42 levels change over successive divisions in budding yeast, which undergoes asymmetric cell division, leading…	["I hypothesise that inhibiting Ydj1 function will increase Cdc42 levels in daughter yeast cells.", "I hypothesise that increased Cdc42 levels in daughter yeast cells will accelerate their aging phenotype.", "I hypothesise that Ydj1's interaction with Cdc42 is essential for maintaining Cdc42 asymmetry during yeast division."]	Q1: I hypothesise that inhibiting Ydj1 function will increase Cdc42 levels in daughter yeast cells. Q2: I hypothesise that increased Cdc42 levels in daughter yeast cells will accelerate their aging phenotype. Q3: I hypothesise that Ydj1's interaction with Cdc42 is essential for maintaining Cdc42 asymmetry during yeast division.	I hypothesise that inhibiting Ydj1 function will increase Cdc42 levels in daughter yeast cells.	I hypothesise that increased Cdc42 levels in daughter yeast cells will accelerate their aging phenotype.	I hypothesise that Ydj1's interaction with Cdc42 is essential for maintaining Cdc42 asymmetry during yeast division.
10.1101/2024.07.12.603275	REM sleep quality is associated with balanced tonic activity of the locus coeruleus during wakefulness	Mortazavi, N.; Talwar, P.; Koshmanova, E.; Sharifpour, R.; Beckers, E.; Berger, A.; Campbell, I.; Paparella, I.; Balda, F.; Dardour Hamzaoui, I.; Berthomier, C.; Bastin, C.; Phillips, C.; Maquet, P.; Collette, F.; Zubkov, M.; Lamalle, L.; Vandewalle, G.	neuroscience	2025-02-03	4	https://www.biorxiv.org/content/10.1101/2024.07.12.603275v4	BackgroundAnimal studies established that the locus coeruleus (LC) plays important roles in sleep and wakefulness regulation. Whether it contributes to sleep variability in humans is not yet established. Here, we investigated if the in vivo activity of the LC is related to the variability in the quality of Rapid Eye Movement (REM) sleep. MethodsWe assessed the LC activity of 34 healthy younger ([…	["I hypothesise that higher locus coeruleus tonic activity during wakefulness improves REM sleep quality in younger individuals.", "I hypothesise that reduced locus coeruleus tonic activity during wakefulness is associated with poorer REM sleep quality in older individuals.", "I hypothesise that locus coeruleus activity during top-down cognitive tasks predicts REM sleep theta oscillation energy."]	Q1: I hypothesise that higher locus coeruleus tonic activity during wakefulness improves REM sleep quality in younger individuals. Q2: I hypothesise that reduced locus coeruleus tonic activity during wakefulness is associated with poorer REM sleep quality in older individuals. Q3: I hypothesise that locus coeruleus activity during top-down cognitive tasks predicts REM sleep theta oscillation ener…	I hypothesise that higher locus coeruleus tonic activity during wakefulness improves REM sleep quality in younger individuals.	I hypothesise that reduced locus coeruleus tonic activity during wakefulness is associated with poorer REM sleep quality in older individuals.	I hypothesise that locus coeruleus activity during top-down cognitive tasks predicts REM sleep theta oscillation energy.
10.1101/2024.10.11.617841	Amyloid beta precursor protein contributes to brain aging and learning decline in short-lived turquoise killifish (Nothobranchius furzeri)	de Bakker, D. E. M.; Mihaljevic, M.; Gharat, K.; Richter, J.; Bagnoli, S.; van Bebber, F.; Adam, L.; Shamim-Schulze, F.; Ohlenschlaeger, O.; Bens, M.; Cirri, E.; Antebi, A.; Matic, I.; Schneider, A.; Schmid, B.; Cellerino, A.; Kirstein, J.; Valenzano, D. R.	neuroscience	23/02/2025	4	https://www.biorxiv.org/content/10.1101/2024.10.11.617841v4	Brain aging is a pivotal risk factor for many neurodegenerative diseases, yet its molecular and cellular mechanisms remain elusive. The amyloid-beta precursor protein (APP) is among the most studied proteins linked to brain pathology; however, its role in non-pathological brain aging remains poorly characterized. Here, we investigate the natural impact of APP on normal brain aging using the short…	["I hypothesise that reducing intraneuronal pyroglutamated amyloid beta accumulation will mitigate age-related learning decline in killifish.", "I hypothesise that appa knockout in killifish will reduce age-dependent brain cell death and inflammation.", "I hypothesise that intraneuronal pyroglutamated amyloid beta accumulation is a conserved marker of non-pathological brain aging across species."]	Q1: I hypothesise that reducing intraneuronal pyroglutamated amyloid beta accumulation will mitigate age-related learning decline in killifish. Q2: I hypothesise that appa knockout in killifish will reduce age-dependent brain cell death and inflammation. Q3: I hypothesise that intraneuronal pyroglutamated amyloid beta accumulation is a conserved marker of non-pathological brain aging across speci…	I hypothesise that reducing intraneuronal pyroglutamated amyloid beta accumulation will mitigate age-related learning decline in killifish.	I hypothesise that appa knockout in killifish will reduce age-dependent brain cell death and inflammation.	I hypothesise that intraneuronal pyroglutamated amyloid beta accumulation is a conserved marker of non-pathological brain aging across species.
10.1101/2023.12.12.571308	Steady-state neuron-predominant LINE-1 encoded ORF1p protein and LINE-1 RNA increase with aging in the mouse and human brain	Bonnifet, T.; Sinnassamy, S.; Massiani-Beaudoin, O.; Mailly, P.; Monnet, H.; Loew, D.; Lombard, B.; Servant, N.; Joshi, R. L.; Fuchs, J.	neuroscience	24/07/2025	4	https://www.biorxiv.org/content/10.1101/2023.12.12.571308v4	Recent studies have established a reciprocal causal link between aging and the activation of transposable elements, characterized in particular by a de-repression of LINE-1 retrotransposons. These LINE-1 elements represent 21% of the human genome, but only a minority of these sequences retain the coding potential essential for their mobility. LINE-1 encoded proteins can induce cell toxicity impli…	["I hypothesise that increased ORF1p protein in aged neurons directly causes neurotoxicity.", "I hypothesise that inhibiting LINE-1 retrotransposon activity will reduce ORF1p levels in aged brains.", "I hypothesise that ORF1p protein interactors in aged neurons are involved in cellular senescence pathways."]	Q1: I hypothesise that increased ORF1p protein in aged neurons directly causes neurotoxicity. Q2: I hypothesise that inhibiting LINE-1 retrotransposon activity will reduce ORF1p levels in aged brains. Q3: I hypothesise that ORF1p protein interactors in aged neurons are involved in cellular senescence pathways.	I hypothesise that increased ORF1p protein in aged neurons directly causes neurotoxicity.	I hypothesise that inhibiting LINE-1 retrotransposon activity will reduce ORF1p levels in aged brains.	I hypothesise that ORF1p protein interactors in aged neurons are involved in cellular senescence pathways.
10.1101/2024.04.22.590523	Neural volatility in orbitofrontal cortex underlies affective processing during healthy cognitive aging	Majumdar, G.; Yazin, F.; Banerjee, A.; Roy, D.	neuroscience	23/07/2025	4	https://www.biorxiv.org/content/10.1101/2024.04.22.590523v4	Understanding the mechanisms behind the variability of neural signals holds the key to the characterization of developmental and lifespan aging trajectories. Here we propose that tracking temporally structured neural fluctuations or volatility in brain areas during naturalistic tasks provides a more salient characterization of ageing trajectories compared to measures based on mean and resting-sta…	["I hypothesise that increased orbitofrontal cortex neural volatility in older adults predicts reduced positive affective bias.", "I hypothesise that higher OFC neural volatility in aged individuals is associated with greater uncertainty in estimating affective states.", "I hypothesise that temporal distortion of OFC neural representations in older adults correlates with distinct affective experi…	Q1: I hypothesise that increased orbitofrontal cortex neural volatility in older adults predicts reduced positive affective bias. Q2: I hypothesise that higher OFC neural volatility in aged individuals is associated with greater uncertainty in estimating affective states. Q3: I hypothesise that temporal distortion of OFC neural representations in older adults correlates with distinct affective ex…	I hypothesise that increased orbitofrontal cortex neural volatility in older adults predicts reduced positive affective bias.	I hypothesise that higher OFC neural volatility in aged individuals is associated with greater uncertainty in estimating affective states.	I hypothesise that temporal distortion of OFC neural representations in older adults correlates with distinct affective experiences.
10.1101/292722	Small RNA-mediated genomic silencing promotes telomere stability in the absence of telomerase in C. elegans	Longtine, C.; Frenk, S.; Lister-Shimauchi, E. H.; Ahmed, S.	genetics	15/05/2025	4	https://www.biorxiv.org/content/10.1101/292722v4	We define an endogenous small RNA pathway in Caenorhabditis elegans that protects telomeres via Dicer, the perinuclear Argonaute protein WAGO-1, the nuclear Argonaute protein HRDE-1, and the HP1 protein HPL-2 that stabilizes the heterochromatin mark H3K9me2. Loss of telomerase induces biogenesis of subtelomeric small RNAs, whereas loss of both telomerase and small RNA-mediated genome silencing in…	["I hypothesise that loss of WAGO-1 or HRDE-1 in C. elegans lacking telomerase will increase TERRA expression and telomeric DNA damage.", "I hypothesise that exogenous subtelomeric small RNAs will rescue accelerated sterility in C. elegans lacking telomerase and EXO-1.", "I hypothesise that HPL-2 is required for H3K9me2 deposition at C. elegans telomeres in the absence of telomerase."]	Q1: I hypothesise that loss of WAGO-1 or HRDE-1 in C. elegans lacking telomerase will increase TERRA expression and telomeric DNA damage. Q2: I hypothesise that exogenous subtelomeric small RNAs will rescue accelerated sterility in C. elegans lacking telomerase and EXO-1. Q3: I hypothesise that HPL-2 is required for H3K9me2 deposition at C. elegans telomeres in the absence of telomerase.	I hypothesise that loss of WAGO-1 or HRDE-1 in C. elegans lacking telomerase will increase TERRA expression and telomeric DNA damage.	I hypothesise that exogenous subtelomeric small RNAs will rescue accelerated sterility in C. elegans lacking telomerase and EXO-1.	I hypothesise that HPL-2 is required for H3K9me2 deposition at C. elegans telomeres in the absence of telomerase.
10.1101/2023.10.13.562187	Devising reliable and accurate epigenetic clocks: choosing the optimal computational solution	Vavourakis, C. D.; Herzog, C. M.; Widschwendter, M.	genomics	30/04/2025	4	https://www.biorxiv.org/content/10.1101/2023.10.13.562187v4	Illumina DNA methylation arrays are frequently used for the discovery of methylation signatures associated with aging and disease. One of the major hurdles to overcome when training trait prediction models is the high dimensionality of the data, with the number of features (CpGs) greatly exceeding the typical number of samples assessed. In addition, most large-scale DNA methylation-based studies …	["I hypothesise that training age prediction models on principal components reduces accuracy compared to using raw CpG data.", "I hypothesise that principal component-based models require larger training datasets to achieve comparable accuracy to CpG-based models.", "I hypothesise that principal component-based models are less accurate for predicting cancer phenotypes than CpG-based models."]	Q1: I hypothesise that training age prediction models on principal components reduces accuracy compared to using raw CpG data. Q2: I hypothesise that principal component-based models require larger training datasets to achieve comparable accuracy to CpG-based models. Q3: I hypothesise that principal component-based models are less accurate for predicting cancer phenotypes than CpG-based models.	I hypothesise that training age prediction models on principal components reduces accuracy compared to using raw CpG data.	I hypothesise that principal component-based models require larger training datasets to achieve comparable accuracy to CpG-based models.	I hypothesise that principal component-based models are less accurate for predicting cancer phenotypes than CpG-based models.
10.1101/2025.01.26.634923	Cerebellar Purkinje cell stripe patterns reveal a differential vulnerability and resistance to cell loss during normal aging in mice	Donofrio, S. G.; Brandenburg, C.; Brown, A. M.; Lin, T.; Lu, H.-C.; Sillitoe, R. V.	neuroscience	18/08/2025	3	https://www.biorxiv.org/content/10.1101/2025.01.26.634923v3	Age-related neurodegenerative diseases involve reduced cell numbers and impaired behavioral capacity. Neurodegeneration and behavioral deficits also occur during aging, and notably in the absence of disease. The cerebellum, which modulates movement and cognition, is susceptible to cell loss in both aging and disease. Here, we demonstrate that cerebellar Purkinje cell loss in aged mice is not spat…	[]	Q1: I hypothesise that Purkinje cells within specific parasagittal stripes are more vulnerable to age-related cell loss than those in other stripes. Q2: I hypothesise that the degree of Purkinje cell loss in specific parasagittal stripes correlates with the severity of motor coordination deficits in aged mice. Q3: I hypothesise that human cerebellar Purkinje cell loss during aging also follows a …	I hypothesise that Purkinje cells within specific parasagittal stripes are more vulnerable to age-related cell loss than those in other stripes.	I hypothesise that the degree of Purkinje cell loss in specific parasagittal stripes correlates with the severity of motor coordination deficits in aged mice.	I hypothesise that human cerebellar Purkinje cell loss during aging also follows a parasagittal stripe pattern.
10.1101/2025.02.27.640021	MyoRep: a novel reporter system to detect early muscle atrophy in vitro and in vivo	Re Cecconi, A. D.; Rizzi, N.; Barone, M.; Palo, F.; Lunardi, M.; Forti, M.; Maggi, A.; Ciana, P.; Terribile, G.; Chiappa, M.; Zentilin, L.; Piccirillo, R.	genetics	25/03/2025	3	https://www.biorxiv.org/content/10.1101/2025.02.27.640021v3	Muscle atrophy occurs during physiological (i.e., fasting, aging) and pathological (i.e., amyotrophic lateral sclerosis, cancer) conditions and anticipates death. Since not all patients will undergo muscle wasting, it would be highly useful to identify them soon to intervene early. We have studied the promoters/enhancers of a subset of atrophy-related genes or atrogenes upregulated in muscles of …	["I hypothesise MyoRep reporter activity correlates with the severity of muscle atrophy in aging mice.", "I hypothesise MyoRep reporter activity predicts the onset of age-related muscle sarcopenia.", "I hypothesise interventions that delay aging will reduce MyoRep reporter activity in muscle."]	Q1: I hypothesise MyoRep reporter activity correlates with the severity of muscle atrophy in aging mice. Q2: I hypothesise MyoRep reporter activity predicts the onset of age-related muscle sarcopenia. Q3: I hypothesise interventions that delay aging will reduce MyoRep reporter activity in muscle.	I hypothesise MyoRep reporter activity correlates with the severity of muscle atrophy in aging mice.	I hypothesise MyoRep reporter activity predicts the onset of age-related muscle sarcopenia.	I hypothesise interventions that delay aging will reduce MyoRep reporter activity in muscle.
10.1101/2025.01.28.635238	Single-cell profiling reveals a novel RAB13+ endothelial subpopulation and profibrotic mesenchymal cells in the aged human bone marrow	Cenzano, I.; Cocera, M.; Lopez Perez, A. R.; Campos-Dopazo, L.; Ruiz, J.; Sancho, I.; San Martin-Uriz, P.; Aguirre-Ruiz, P.; Sarvide, S.; Vilas-Zornoza, A.; Ripalda-Cemborain, P.; Alignani, D.; Lopez, A.; Minana Barrios, M.; Quilez Agreda, D.; Ye, J.; Lehmann, R.; Sudupe, L.; Abengozar-Muela, M.; Tamariz-Amador, L.-E.; Muinos-Lopez, E.; Saez, B.; Tegner, J.; A. Calvo, I.; Gomez-Cabrero, D.; Prosp…	molecular biology	24/06/2025	3	https://www.biorxiv.org/content/10.1101/2025.01.28.635238v3	The bone marrow (BM) microenvironment plays a crucial role in regulating hematopoiesis, yet the molecular changes associated with aging in humans remain poorly understood. Using single-cell RNA sequencing, we uncovered transcriptional shifts in BM endothelial cells (EC) and mesenchymal stem cells (MSC) during aging. Aged sinusoidal EC exhibited a prothrombotic phenotype with compromised mitochond…	["I hypothesise that RAB13+ endothelial cells in aged bone marrow promote fibrosis.", "I hypothesise that THY1+ mesenchymal cells in aged bone marrow drive matrix remodeling impairment.", "I hypothesise that aged sinusoidal endothelial cells exhibit reduced mitochondrial function."]	Q1: I hypothesise that RAB13+ endothelial cells in aged bone marrow promote fibrosis. Q2: I hypothesise that THY1+ mesenchymal cells in aged bone marrow drive matrix remodeling impairment. Q3: I hypothesise that aged sinusoidal endothelial cells exhibit reduced mitochondrial function.	I hypothesise that RAB13+ endothelial cells in aged bone marrow promote fibrosis.	I hypothesise that THY1+ mesenchymal cells in aged bone marrow drive matrix remodeling impairment.	I hypothesise that aged sinusoidal endothelial cells exhibit reduced mitochondrial function.
10.1101/2024.01.20.576435	Axonal distribution of mitochondria maintains neuronal autophagy during aging via eIF2ÃƒÅ½Ã‚Â²	Shinno, K.; Miura, Y.; Iijima, K. M.; Suzuki, E.; Ando, K.	cell biology	2025-07-07	3	https://www.biorxiv.org/content/10.1101/2024.01.20.576435v3	Neuronal aging and neurodegenerative diseases are accompanied by proteostasis collapse, while the cellular factors that trigger it have not been identified. Impaired mitochondrial transport in the axon is another feature of aging and neurodegenerative diseases. Using Drosophila, we found that genetic depletion of axonal mitochondria causes dysregulation of protein degradation. Axons with mitochon…	["I hypothesise that reducing axonal mitochondrial content in aging neurons directly impairs autophagic flux.", "I hypothesise that increased neuronal eIF2ÃƒÅ½Ã‚Â² expression in aging neurons causes autophagic defects independent of mitochondrial distribution.", "I hypothesise that restoring axonal mitochondrial distribution in aging neurons rescues eIF2ÃƒÅ½Ã‚Â²-induced autophagic defects."]	Q1: I hypothesise that reducing axonal mitochondrial content in aging neurons directly impairs autophagic flux. Q2: I hypothesise that increased neuronal eIF2ÃƒÅ½Ã‚Â² expression in aging neurons causes autophagic defects independent of mitochondrial distribution. Q3: I hypothesise that restoring axonal mitochondrial distribution in aging neurons rescues eIF2ÃƒÅ½Ã‚Â²-induced autophagic defects.	I hypothesise that reducing axonal mitochondrial content in aging neurons directly impairs autophagic flux.	I hypothesise that increased neuronal eIF2ÃƒÅ½Ã‚Â² expression in aging neurons causes autophagic defects independent of mitochondrial distribution.	I hypothesise that restoring axonal mitochondrial distribution in aging neurons rescues eIF2ÃƒÅ½Ã‚Â²-induced autophagic defects.
10.1101/2024.06.08.597928	Endothelin B receptor inhibition rescues aging-dependent neuronal regenerative decline	Feng, R.; Rosen, S. F.; Ansari, I.; John, S.; Thomsen, M. B.; Avraham, O.; Geoffroy, C. G.; Cavalli, V.	neuroscience	2025-09-06	3	https://www.biorxiv.org/content/10.1101/2024.06.08.597928v3	Peripheral sensory neurons regenerate their axons after injury to regain function, but this ability declines with age. The mechanisms behind this decline are not fully understood. While excessive production of endothelin 1 (ET-1), a potent vasoconstrictor, is linked to many diseases that increase with age, the role of ET-1 and its receptors in axon regeneration is unknown. Using single cell RNA s…	["I hypothesise ETBR inhibition restores aged SGC abundance and Cx43 expression after nerve injury.", "I hypothesise ET-1 directly inhibits axon growth from aged sensory neurons via ETBR.", "I hypothesise Bosentan treatment increases axon regeneration in aged mice by modulating SGC function."]	Q1: I hypothesise ETBR inhibition restores aged SGC abundance and Cx43 expression after nerve injury. Q2: I hypothesise ET-1 directly inhibits axon growth from aged sensory neurons via ETBR. Q3: I hypothesise Bosentan treatment increases axon regeneration in aged mice by modulating SGC function.	I hypothesise ETBR inhibition restores aged SGC abundance and Cx43 expression after nerve injury.	I hypothesise ET-1 directly inhibits axon growth from aged sensory neurons via ETBR.	I hypothesise Bosentan treatment increases axon regeneration in aged mice by modulating SGC function.
10.1101/2025.02.12.637854	3BTRON: A Blood-Brain Barrier Recognition Network	Fletcher-Lloyd, N. V.; Bravo-Ferrer, I.; Gaasdal-Bech, K.; Diaz Castro, B.; Barnaghi, P.	neuroscience	29/05/2025	3	https://www.biorxiv.org/content/10.1101/2025.02.12.637854v3	The blood-brain barrier (BBB) plays a crucial role in maintaining brain homeostasis. During ageing, the BBB undergoes structural alterations. Electron microscopy (EM) is the gold standard for studying the structural alterations of the brain vasculature. However, analysis of EM images is time-intensive and can be prone to selection bias, limiting our understanding of the structural effect of agein…	["I hypothesise 3BTRON can predict BBB age with >75% accuracy in unseen mouse brain EM images.", "I hypothesise specific BBB structural features identified by 3BTRON correlate with age-related decline."]	Q1: I hypothesise 3BTRON can predict BBB age with >75% accuracy in unseen mouse brain EM images. Q2: I hypothesise specific BBB structural features identified by 3BTRON correlate with age-related decline.	I hypothesise 3BTRON can predict BBB age with >75% accuracy in unseen mouse brain EM images.	I hypothesise specific BBB structural features identified by 3BTRON correlate with age-related decline.
10.1101/2025.02.11.637629	Plat safeguards maternally aged oocytes against programmed cell death through activating the Erk1/2 pathway	He, X.; Zhang, H.; Wang, Y.; Yan, H.; Chen, Q.; Su, M.; Shi, Q.; Zeng, X.; Sheng, W.; Wang, Y.; Wang, C.; Hou, S.; Hu, Z.; He, Y.; Wang, X.	developmental biology	2025-07-06	3	https://www.biorxiv.org/content/10.1101/2025.02.11.637629v3	The decline in oocytes quality and developmental potential with female reproductive aging is well recognized, yet the underlying mechanisms remain insufficiently investigated. In this study, through an integrative analysis of transcriptomes and morphologies of individual oocytes from young and aged mice, morphologically defective aged oocytes are identified with distinct transcriptomic features. …	["I hypothesise that Plat downregulation in aged oocytes directly causes increased apoptosis and ferroptosis.", "I hypothesise that activating the Erk1/2 pathway in aged oocytes will reduce programmed cell death.", "I hypothesise that exogenous tPA supplementation will improve the developmental potential of aged oocytes."]	Q1: I hypothesise that Plat downregulation in aged oocytes directly causes increased apoptosis and ferroptosis. Q2: I hypothesise that activating the Erk1/2 pathway in aged oocytes will reduce programmed cell death. Q3: I hypothesise that exogenous tPA supplementation will improve the developmental potential of aged oocytes.	I hypothesise that Plat downregulation in aged oocytes directly causes increased apoptosis and ferroptosis.	I hypothesise that activating the Erk1/2 pathway in aged oocytes will reduce programmed cell death.	I hypothesise that exogenous tPA supplementation will improve the developmental potential of aged oocytes.
10.1101/2024.05.03.589404	Improving Predictability, Test-Retest Reliability and Generalisability of Brain-Wide Associations for Cognitive Abilities via Multimodal Stacking	Tetereva, A.; Knodt, A.; Melzer, T.; van der Vliet, W.; Gibson, B.; Hariri, A.; Whitman, E. T.; Li, J.; Lal Khakpoor, F.; Deng, J.; Ireland, D.; Ramrakha, S.; Pat, N.	neuroscience	2025-05-03	3	https://www.biorxiv.org/content/10.1101/2024.05.03.589404v3	Brain-wide association studies (BWASs) have attempted to relate cognitive abilities with brain phenotypes, but have been challenged by issues such as predictability, test-retest reliability, and cross-cohort generalisability. To tackle these challenges, we proposed a machine-learning "stacking" approach that draws information from whole-brain magnetic resonance imaging (MRI) across different moda…	["I hypothesise that multimodal MRI stacking predicts cognitive decline in older adults more accurately than single-modality MRI.", "I hypothesise that task-fMRI contrasts contribute more to predicting childhood cognitive abilities from adult MRI than structural MRI.", "I hypothesise that stacking multimodal MRI improves the generalisability of brain-cognition associations across different age co…	Q1: I hypothesise that multimodal MRI stacking predicts cognitive decline in older adults more accurately than single-modality MRI. Q2: I hypothesise that task-fMRI contrasts contribute more to predicting childhood cognitive abilities from adult MRI than structural MRI. Q3: I hypothesise that stacking multimodal MRI improves the generalisability of brain-cognition associations across different ag…	I hypothesise that multimodal MRI stacking predicts cognitive decline in older adults more accurately than single-modality MRI.	I hypothesise that task-fMRI contrasts contribute more to predicting childhood cognitive abilities from adult MRI than structural MRI.	I hypothesise that stacking multimodal MRI improves the generalisability of brain-cognition associations across different age cohorts.
10.1101/2024.12.24.630287	Inhibition of PDE5 induces rapid non-genomic increase in hippocampal dendritic spines via specific kinases	Soma, M.; Ogiue-Ikeda, M.; Horie, S.; Saito, M.; Mabashi, S.; Ishii, H.; Kawato, S.	neuroscience	2025-01-03	3	https://www.biorxiv.org/content/10.1101/2024.12.24.630287v3	Cyclic guanosine monophosphate (cGMP) is a typical neuromodulator that is used in neuronal synapses. Inhibitor of phosphodiesterase 5 (PDE5) could regulates signaling pathways by elevating cGMP levels. In the current study, we found that the treatments with tadalafil, a PDE5 inhibitor, for 2 h rapidly and non-genomically increased the total density of dendritic spines, using confocal imaging of L…	["I hypothesise that tadalafil treatment increases hippocampal dendritic spine density via PKG activation.", "I hypothesise that tadalafil treatment increases hippocampal dendritic spine density via GSK-3 inhibition.", "I hypothesise that tadalafil treatment improves cognitive function by increasing hippocampal dendritic spine density."]	Q1: I hypothesise that tadalafil treatment increases hippocampal dendritic spine density via PKG activation. Q2: I hypothesise that tadalafil treatment increases hippocampal dendritic spine density via GSK-3 inhibition. Q3: I hypothesise that tadalafil treatment improves cognitive function by increasing hippocampal dendritic spine density.	I hypothesise that tadalafil treatment increases hippocampal dendritic spine density via PKG activation.	I hypothesise that tadalafil treatment increases hippocampal dendritic spine density via GSK-3 inhibition.	I hypothesise that tadalafil treatment improves cognitive function by increasing hippocampal dendritic spine density.
10.1101/2024.05.21.595193	Parkinson's disease-associated shifts between DNA methylation and DNA hydroxymethylation in human brain	Choza, J. I.; Virani, M.; Kuhn, N. C.; Adams, M.; Kochmanski, J.; Bernstein, A. I.	neuroscience	2025-02-02	3	https://www.biorxiv.org/content/10.1101/2024.05.21.595193v3	Epigenetic mechanisms are mediators of interactions between aging, genetics, and environmental factors in sporadic Parkinsons disease (PD). Multiple studies have explored the DNA modifications in PD, but few focus on 5-hydroxymethylcytosine (5-hmC), which is important in the central nervous system and sensitive to environmental exposures. To date, studies have not differentiated between 5-methylc…	[]	Q1: I hypothesise that increased DNA hydroxymethylation in LRRK2 gene promoters is associated with Parkinson's disease. Q2: I hypothesise that shifts in DNA methylation/hydroxymethylation in RAB32 and AGAP1 genes correlate with PD severity. Q3: I hypothesise that altered DNA hydroxymethylation in neuroinflammation-related genes precedes PD diagnosis.	I hypothesise that increased DNA hydroxymethylation in LRRK2 gene promoters is associated with Parkinson's disease.	I hypothesise that shifts in DNA methylation/hydroxymethylation in RAB32 and AGAP1 genes correlate with PD severity.	I hypothesise that altered DNA hydroxymethylation in neuroinflammation-related genes precedes PD diagnosis.
10.1101/2024.05.17.594682	No effect of additional education on long-term brain structure: a preregistered natural experiment in thousands of individuals.	Judd, N.; Kievit, R.	neuroscience	2025-11-02	3	https://www.biorxiv.org/content/10.1101/2024.05.17.594682v3	Education is related to a wide variety of beneficial health, behavioral, and societal outcomes. However, whether education causes long-term structural changes in the brain remains unclear. A pressing challenge is that individuals self-select into continued education, thereby introducing a wide variety of environmental and genetic confounders. Fortunately, natural experiments allow us to isolate t…	[]	Q1: I hypothesise that an additional year of education does not alter long-term brain structure in older adults. Q2: I hypothesise that increased education does not mitigate age-related decline in brain structure.	I hypothesise that an additional year of education does not alter long-term brain structure in older adults.	I hypothesise that increased education does not mitigate age-related decline in brain structure.
10.1101/2024.10.27.620550	Integrated Spatial and Single-Nuclei Transcriptomic Analysis of Long Non-Coding RNAs in Alzheimer's Disease	Ng, B.; Avey, D. R.; Sultan, F.; Lopes, K. d. P.; Fujita, M.; Saunders, D.; Vialle, R. A.; Vyas, H.; Kearns, N. A.; Tasaki, S.; Iatrou, A.; Tissera, S. D.; Lagrimas, A. K.; Chang, T.-H.; Xu, J.; Yu, C.; Menon, V.; Gaiteri, C.; De Jager, P. L.; Bennett, D. A.; Wang, Y.	neuroscience	23/08/2025	3	https://www.biorxiv.org/content/10.1101/2024.10.27.620550v3	BackgroundLong non-coding RNAs (lncRNAs) are critical regulators of physiological and pathological processes, with their dysregulation increasingly implicated in aging and Alzheimers disease (AD). To investigate the spatial and cellular distribution of lncRNAs in the aging brain, we leveraged published spatial transcriptomics (ST), single-nucleus RNA sequencing (snRNA-seq), and bulk RNA-seq datas…	["I hypothesise OIP5-AS1 upregulation in AD microglia drives pro-inflammatory cytokine secretion.", "I hypothesise subregion-enriched lncRNAs contribute to AD pathology independently of cell-type specificity.", "I hypothesise lncRNAs involved in chromatin remodeling are dysregulated in aging human cortex in AD."]	Q1: I hypothesise OIP5-AS1 upregulation in AD microglia drives pro-inflammatory cytokine secretion. Q2: I hypothesise subregion-enriched lncRNAs contribute to AD pathology independently of cell-type specificity. Q3: I hypothesise lncRNAs involved in chromatin remodeling are dysregulated in aging human cortex in AD.	I hypothesise OIP5-AS1 upregulation in AD microglia drives pro-inflammatory cytokine secretion.	I hypothesise subregion-enriched lncRNAs contribute to AD pathology independently of cell-type specificity.	I hypothesise lncRNAs involved in chromatin remodeling are dysregulated in aging human cortex in AD.
10.1101/2024.10.23.619838	Computer prediction and genetic analysis identifies retinoic acid modulation as a driver of conserved longevity pathways in genetically-diverse Caenorhabditis nematodes	Banse, S. A.; Sedore, C. A.; Coleman-Hulbert, A.; Johnson, E.; Onken, B.; Hall, D.; Segerdell, E.; Jackson, E. G.; Song, Y.; Osman, H. C.; Xue, J.; Basttistoni, E.; Guo, S.; Foulger, A.; Achanta, M.; Sheikh, M.; Fitzgibbon, T.; Willis, J. H.; Woodruff, G. C.; Driscoll, M.; Lithgow, G.; Phillips, P. C.	genetics	21/07/2025	3	https://www.biorxiv.org/content/10.1101/2024.10.23.619838v3	Aging is a pan-metazoan process with significant consequences for human health and society--discovery of new compounds that ameliorate the negative health impacts of aging promise to be of tremendous benefit across a number of age-based comorbidities. One method to prioritize a testable subset of the nearly infinite universe of potential compounds is to use computational prediction of their likel…	["I hypothesise that all-trans retinoic acid extends lifespan in C. elegans by activating AAK-2.", "I hypothesise that all-trans retinoic acid extends lifespan in C. elegans via NRF-2/SKN-1 and HSF-1.", "I hypothesise that AKT-1 and AKT-2 are required for all-trans retinoic acid-mediated lifespan extension in C. elegans."]	Q1: I hypothesise that all-trans retinoic acid extends lifespan in C. elegans by activating AAK-2. Q2: I hypothesise that all-trans retinoic acid extends lifespan in C. elegans via NRF-2/SKN-1 and HSF-1. Q3: I hypothesise that AKT-1 and AKT-2 are required for all-trans retinoic acid-mediated lifespan extension in C. elegans.	I hypothesise that all-trans retinoic acid extends lifespan in C. elegans by activating AAK-2.	I hypothesise that all-trans retinoic acid extends lifespan in C. elegans via NRF-2/SKN-1 and HSF-1.	I hypothesise that AKT-1 and AKT-2 are required for all-trans retinoic acid-mediated lifespan extension in C. elegans.
10.1101/2025.03.18.643933	Aging-associated Increase of GATA4 levels in Articular Cartilage is Linked to Impaired Regenerative Capacity of Chondrocytes and Osteoarthritis	Makarczyk, M.; Zhang, Y.; Aguglia, A.; Bartholomew, O.; Hines, S.; Sinkar, S.; Liu, S.; Duvall, C.; Lin, H.	cell biology	14/08/2025	3	https://www.biorxiv.org/content/10.1101/2025.03.18.643933v3	Although the causal association between aging and osteoarthritis (OA) has been documented, our understanding of the underlying mechanism remains incomplete. To define the regulatory molecules governing chondrocyte aging, we performed transcriptomic analysis of young and old human chondrocytes from healthy donors. The data predicted that GATA binding protein 4 (GATA4) may play a key role in mediat…	["I hypothesise that reducing GATA4 levels in aged chondrocytes will restore their cartilage-forming capacity.", "I hypothesise that elevated GATA4 in chondrocytes directly promotes osteoarthritis severity in vivo.", "I hypothesise that GATA4 overexpression in chondrocytes increases pro-inflammatory cytokine production."]	Q1: I hypothesise that reducing GATA4 levels in aged chondrocytes will restore their cartilage-forming capacity. Q2: I hypothesise that elevated GATA4 in chondrocytes directly promotes osteoarthritis severity in vivo. Q3: I hypothesise that GATA4 overexpression in chondrocytes increases pro-inflammatory cytokine production.	I hypothesise that reducing GATA4 levels in aged chondrocytes will restore their cartilage-forming capacity.	I hypothesise that elevated GATA4 in chondrocytes directly promotes osteoarthritis severity in vivo.	I hypothesise that GATA4 overexpression in chondrocytes increases pro-inflammatory cytokine production.
10.1101/2025.07.02.662760	Developmental and Aging Changes in Brain Network Switching Dynamics Revealed by EEG Phase Synchronization	Perdikis, D.; Sleimen-Malkoun, R.; MuÃƒÅ’Ã‹â€ ller, V.; Jirsa, V.	neuroscience	2025-09-07	3	https://www.biorxiv.org/content/10.1101/2025.07.02.662760v3	Adaptive behavior depends on the brains capacity to vary its activity across multiple spatial and temporal scales. Yet, how distinct facets of this variability evolve from childhood to older adulthood remains poorly understood, limiting mechanistic models of neurocognitive aging. Here, we characterize lifespan neural variability using an integrated empirical-computational approach. We analyzed hi…	["I hypothesise that reduced low-frequency power in older adults is due to increased cellular senescence in brain networks.", "I hypothesise that the inverted U-trend in phase-synchrony reconfigurations is mediated by age-related changes in synaptic plasticity.", "I hypothesise that interventions targeting synaptic plasticity will restore young adult-like phase-synchrony dynamics in older adults.…	Q1: I hypothesise that reduced low-frequency power in older adults is due to increased cellular senescence in brain networks. Q2: I hypothesise that the inverted U-trend in phase-synchrony reconfigurations is mediated by age-related changes in synaptic plasticity. Q3: I hypothesise that interventions targeting synaptic plasticity will restore young adult-like phase-synchrony dynamics in older adu…	I hypothesise that reduced low-frequency power in older adults is due to increased cellular senescence in brain networks.	I hypothesise that the inverted U-trend in phase-synchrony reconfigurations is mediated by age-related changes in synaptic plasticity.	I hypothesise that interventions targeting synaptic plasticity will restore young adult-like phase-synchrony dynamics in older adults.
10.1101/2025.07.01.662622	Cell enlargement causes mitotic errors and aneuploidy in cells that evade senescence after CDK4/6 inhibition	Pareri, A. U.; Losito, M.; Foijer, F.; Saurin, A. T.	cancer biology	2025-07-07	3	https://www.biorxiv.org/content/10.1101/2025.07.01.662622v3	AO_SCPLOWBSTRACTC_SCPLOWCDK4/6 inhibitors (CDK4/6i) arrest the cell cycle in G1 leading to cellular overgrowth and p53-dependent senescence. They are used to treat metastatic HR+/HER2-breast cancer, but resistance is common, and this has been associated with TP53 loss and senescence evasion. We show here that enlarged CDK4/6i-treated cells that evade senescence mis-segregate chromosomes due to de…	["I hypothesise that reducing cell size during CDK4/6 inhibition prevents aneuploidy in senescent-evading cells.", "I hypothesise that restoring sister chromatid cohesion rescues chromosome segregation errors in enlarged, senescent-evading cells.", "I hypothesise that impaired Sgo1 localisation to centromeres causes aneuploidy in cells that evade senescence after CDK4/6 inhibition."]	Q1: I hypothesise that reducing cell size during CDK4/6 inhibition prevents aneuploidy in senescent-evading cells. Q2: I hypothesise that restoring sister chromatid cohesion rescues chromosome segregation errors in enlarged, senescent-evading cells. Q3: I hypothesise that impaired Sgo1 localisation to centromeres causes aneuploidy in cells that evade senescence after CDK4/6 inhibition.	I hypothesise that reducing cell size during CDK4/6 inhibition prevents aneuploidy in senescent-evading cells.	I hypothesise that restoring sister chromatid cohesion rescues chromosome segregation errors in enlarged, senescent-evading cells.	I hypothesise that impaired Sgo1 localisation to centromeres causes aneuploidy in cells that evade senescence after CDK4/6 inhibition.
10.1101/2025.06.20.660826	NAD+ boosting by oral nicotinamide mononucleotide administration regulates key metabolic and immune pathways through SIRT1 dependent and independent mechanisms to mitigate diet-induced obesity and dyslipidemia in mice.	Majeed, Y.; Halabi, N. M.; Engelke, R.; Sarwath, H.; Al-Noubi, M. N.; Choi, S.; Al-Malki, A.; Agha, M. V.; Vakayil, M.; Chouchane, L.; Schmidt, F.; Mazloum, N. A.	physiology	2025-07-09	3	https://www.biorxiv.org/content/10.1101/2025.06.20.660826v3	Sirtuins are NAD+-dependent histone deacetylases that play a key role in metabolism. Sirtuin activity is compromised in aging and metabolic disorders, and pharmacological strategies that promote sirtuin function including NAD+ boosting approaches show potential as therapeutics. To study the impact of nicotinamide mononucleotide (NMN) supplementation in mice in high fat diet (HFD) induced obesity …	[]	Q1: I hypothesise NMN administration reduces diet-induced weight gain in mice by increasing energy expenditure via SIRT1. Q2: I hypothesise NMN administration reduces fat mass in mice independently of SIRT1. Q3: I hypothesise NMN administration corrects dyslipidemia in mice through SIRT1-dependent mechanisms.	I hypothesise NMN administration reduces diet-induced weight gain in mice by increasing energy expenditure via SIRT1.	I hypothesise NMN administration reduces fat mass in mice independently of SIRT1.	I hypothesise NMN administration corrects dyslipidemia in mice through SIRT1-dependent mechanisms.
10.1101/2025.05.31.657024	Galectin-3 C-epitope, ANP, PPIA, and albumin function as drug-responsive panel biomarkers and therapeutic targets in aging and pressure overload-induced cardiac hypertrophy	Shinde, P. L.; Kumar, V.; Singh, S.; Sivakumar, K. C.; Mishra, R.	pathology	2025-08-06	3	https://www.biorxiv.org/content/10.1101/2025.05.31.657024v3	Biological aging (BA) and pressure overload-induced cardiac hypertrophy (PO-CH) are marked by myocardial thickening, fibrosis, and functional decline, culminating in an increased risk of heart failure. Effective clinical management requires biomarkers that not only track disease progression but also monitor therapeutic response. Using Amalaki Rasayana (AR), a cardioprotective nutraceutical-based …	["I hypothesise that reducing galectin-3 C-epitope oligomers will reverse cardiac hypertrophy in aging rats.", "I hypothesise that Amalaki Rasayana treatment will decrease ANP, PPIA, and albumin levels in aging hearts.", "I hypothesise that inhibiting galectin-3 secretion via phosphorylation will reduce cardiac fibrosis."]	Q1: I hypothesise that reducing galectin-3 C-epitope oligomers will reverse cardiac hypertrophy in aging rats. Q2: I hypothesise that Amalaki Rasayana treatment will decrease ANP, PPIA, and albumin levels in aging hearts. Q3: I hypothesise that inhibiting galectin-3 secretion via phosphorylation will reduce cardiac fibrosis.	I hypothesise that reducing galectin-3 C-epitope oligomers will reverse cardiac hypertrophy in aging rats.	I hypothesise that Amalaki Rasayana treatment will decrease ANP, PPIA, and albumin levels in aging hearts.	I hypothesise that inhibiting galectin-3 secretion via phosphorylation will reduce cardiac fibrosis.
10.1101/2025.01.20.633975	Standardised TruAI automated quantification of intracellular neuromelanin granules in human brain tissue sections	Filimontseva, A.; Cuadros, T.; Chatterton, Z.; Burke, A.; Ansari Mahabadian, A.; Compte, J.; Fu, Y.; Vila, M.; Halliday, G.	neuroscience	14/08/2025	3	https://www.biorxiv.org/content/10.1101/2025.01.20.633975v3	AimsTo standardise and automate the quantitation of human-unique neuromelanin granules in catecholamine neurons in post-mortem tissue sections from healthy individuals at different ages to understand any changes in these granules with age. Methods5-6 {micro}m-thick fixed and paraffin-embedded transverse midbrain tissue sections were supplied from 47 cases from three brain banks following ethical …	["I hypothesise that increased optical density of intracellular neuromelanin granules correlates with chronological age in human brain tissue.", "I hypothesise that the browner colour change of intracellular neuromelanin granules with age is due to increased eumelanin content."]	Q1: I hypothesise that increased optical density of intracellular neuromelanin granules correlates with chronological age in human brain tissue. Q2: I hypothesise that the browner colour change of intracellular neuromelanin granules with age is due to increased eumelanin content.	I hypothesise that increased optical density of intracellular neuromelanin granules correlates with chronological age in human brain tissue.	I hypothesise that the browner colour change of intracellular neuromelanin granules with age is due to increased eumelanin content.
10.1101/2025.04.22.649977	spRefine Denoises and Imputes Spatial Transcriptomics with a Reference-Free Framework Powered by Genomic Language Model	Liu, T.; Huang, T.; Jin, W.; Chu, T.; Ying, R.; Zhao, H.	genomics	2025-07-07	3	https://www.biorxiv.org/content/10.1101/2025.04.22.649977v3	The analysis of spatial transcriptomics is hindered by high noise levels and missing gene measurements, challenges that are further compounded by the higher cost of spatial data compared to traditional single-cell data. To overcome this challenge, we introduce spRefine, a deep learning framework that leverages genomic language models to jointly denoise and impute spatial transcriptomic data. Our …	["I hypothesise spRefine improves spatial ageing clock accuracy by reducing noise in transcriptomic data.", "I hypothesise spRefine identifies novel aging-related gene relationships missed by current methods.", "I hypothesise spRefine's imputation capability enhances the detection of subtle neuronal function loss in aging tissues."]	Q1: I hypothesise spRefine improves spatial ageing clock accuracy by reducing noise in transcriptomic data. Q2: I hypothesise spRefine identifies novel aging-related gene relationships missed by current methods. Q3: I hypothesise spRefine's imputation capability enhances the detection of subtle neuronal function loss in aging tissues.	I hypothesise spRefine improves spatial ageing clock accuracy by reducing noise in transcriptomic data.	I hypothesise spRefine identifies novel aging-related gene relationships missed by current methods.	I hypothesise spRefine's imputation capability enhances the detection of subtle neuronal function loss in aging tissues.
10.1101/2025.05.02.651974	Loss of age-associated increase in m6A-modified RNA contributes to GABAergic dysregulation in Alzheimer's disease	Libera, J. L.; Hu, J.; Nguyen, T.-A.; Wang, Z.; van der Spek, S. J. F.; Schult, K.; Dorrian, L.; Majka, J.; Tobunluepop, K.; Puri, S.; Kynshov, A.; Kanaan, N. M.; Nelson, P. T.; Meyer, K.; Hou, L.; Zhang, X.; Wolozin, B.	neuroscience	2025-07-05	3	https://www.biorxiv.org/content/10.1101/2025.05.02.651974v3	Dysregulated RNA metabolism is a significant feature of Alzheimers disease (AD), yet how post-transcriptional RNA modifications like N6-methyladenosine (m6A) are altered in AD is unknown. Here, we performed deamination adjacent to RNA modification targets (DART-seq) on human dorsolateral prefrontal cortices to assess changes in m6A with nucleotide resolution. In non-AD brains, m6A sites increased…	["I hypothesise that restoring age-associated m6A site increases in AD brains will normalize GABRA1 expression.", "I hypothesise that global hypomethylation of transcripts in AD brains directly causes reduced GABAergic signaling.", "I hypothesise that m6A modification in the 3'UTR of tripartite synapse proteins is essential for healthy aging."]	Q1: I hypothesise that restoring age-associated m6A site increases in AD brains will normalize GABRA1 expression. Q2: I hypothesise that global hypomethylation of transcripts in AD brains directly causes reduced GABAergic signaling. Q3: I hypothesise that m6A modification in the 3'UTR of tripartite synapse proteins is essential for healthy aging.	I hypothesise that restoring age-associated m6A site increases in AD brains will normalize GABRA1 expression.	I hypothesise that global hypomethylation of transcripts in AD brains directly causes reduced GABAergic signaling.	I hypothesise that m6A modification in the 3'UTR of tripartite synapse proteins is essential for healthy aging.
10.1101/2024.10.18.619025	Elevated Ubiquitin Phosphorylation by PINK1 Contributes to Proteasomal Impairment and Promotes Neurodegeneration	Chen, C.; Gao, T.-Y.; Yi, H.-W.; Zhang, Y.; Wang, T.; Lou, Z.-L.; Wei, T.-F.; Lu, Y.-B.; Li, T.; Tang, C.; Zhang, W.-P.	biochemistry	15/05/2025	3	https://www.biorxiv.org/content/10.1101/2024.10.18.619025v3	Ubiquitin (Ub), a central regulator of protein turnover, can be phosphorylated by PINK1 (PTEN-induced putative kinase 1) to generate S65-phosphorylated ubiquitin (pUb). Elevated pUb levels have been observed in aged human brains and in Parkinsons disease, but the mechanistic link between pUb elevation and neurodegeneration remains unclear. Here, we demonstrate that pUb elevation is a common featu…	[]	Q1: I hypothesise that elevated S65-phosphorylated ubiquitin directly impairs proteasome-substrate interactions in aged neurons. Q2: I hypothesise that reducing S65-phosphorylated ubiquitin levels will ameliorate proteostasis disruption in aging brains. Q3: I hypothesise that cytosolic PINK1 accumulation is a direct cause of proteasomal impairment in neurodegenerative conditions.	I hypothesise that elevated S65-phosphorylated ubiquitin directly impairs proteasome-substrate interactions in aged neurons.	I hypothesise that reducing S65-phosphorylated ubiquitin levels will ameliorate proteostasis disruption in aging brains.	I hypothesise that cytosolic PINK1 accumulation is a direct cause of proteasomal impairment in neurodegenerative conditions.
10.1101/2024.10.10.617725	Extensive longevity and DNA virus-driven adaptation in nearctic Myotis bats	Vazquez, J. M.; Lauterbur, M. E.; Mottaghinia, S.; Gaucherand, L.; Maesen, S.; Singer, M.; Santos Villa, S. G.; Bucci, M.; Fraser, D.; Gray-Sandoval, G.; Haidar, Z. R.; Han, M.; Kohler, W.; Lama, T. M.; Le Corf, A.; Loyer, C.; McMillan, D.; Li, S.; Lo, J.; Rey, C.; Capel, S. L.; Slocum, K.; Thomas, W.; Debelak Tyburec, J.; Miller, R.; Buchalski, M.; Vazquez-Medina, J. P.; Pfeffer, S.; Etienne, L.…	genomics	27/08/2025	3	https://www.biorxiv.org/content/10.1101/2024.10.10.617725v3	The genus Myotis is one of the largest clades of bats, and exhibits some of the most extreme variation in lifespans among mammals alongside unique adaptations to viral tolerance and immune defense. To study the evolution of longevity-associated traits and infectious disease, we generated cell lines and near-complete genome assemblies for 8 closely related species of Myotis. Using genome-wide scre…	["I hypothesise that increased DNA damage response in long-lived Myotis bats contributes to their longevity.", "I hypothesise that adaptation to DNA viruses, not RNA viruses, is associated with longevity in Myotis bats.", "I hypothesise that recurrent evolution of longevity in Myotis bats is linked to increased cancer resistance."]	Q1: I hypothesise that increased DNA damage response in long-lived Myotis bats contributes to their longevity. Q2: I hypothesise that adaptation to DNA viruses, not RNA viruses, is associated with longevity in Myotis bats. Q3: I hypothesise that recurrent evolution of longevity in Myotis bats is linked to increased cancer resistance.	I hypothesise that increased DNA damage response in long-lived Myotis bats contributes to their longevity.	I hypothesise that adaptation to DNA viruses, not RNA viruses, is associated with longevity in Myotis bats.	I hypothesise that recurrent evolution of longevity in Myotis bats is linked to increased cancer resistance.
10.1101/2024.10.01.616156	Decreased hippocampal neurite density in middle-aged/aging adults following prenatal exposure to higher levels of maternal inflammation	Mohyee, R. A.; Elliott, B. L.; Pike, M. R.; Smith, E.; Kring, A. M.; Olson, I. R.; Breen, E. C.; Cohn, B. A.; Cirillo, P. M.; Krigbaum, N. Y.; Olino, T. M.; D'Esposito, M.; Cogan, A. B.; Patwardan, B. P.; Ellman, L. M.	immunology	22/08/2025	3	https://www.biorxiv.org/content/10.1101/2024.10.01.616156v3	In animal models, exposure to heightened maternal inflammation in utero is associated with altered offspring hippocampal development, including reduced dendritic arborization and density. However, the effects of prenatal maternal inflammation (PNMI) on offspring hippocampal microstructure in humans remains unclear. Here, we examined the relationship between exposure to PNMI and neurite density in…	["I hypothesise that higher first trimester maternal IL-1RA levels are associated with reduced CA3 neurite density in offspring at age 59.", "I hypothesise that higher second trimester maternal IL-6 levels are associated with reduced subiculum neurite density in offspring at age 59.", "I hypothesise that higher first trimester maternal IL-6 levels are associated with reduced dentate gyrus neurite…	Q1: I hypothesise that higher first trimester maternal IL-1RA levels are associated with reduced CA3 neurite density in offspring at age 59. Q2: I hypothesise that higher second trimester maternal IL-6 levels are associated with reduced subiculum neurite density in offspring at age 59. Q3: I hypothesise that higher first trimester maternal IL-6 levels are associated with reduced dentate gyrus neu…	I hypothesise that higher first trimester maternal IL-1RA levels are associated with reduced CA3 neurite density in offspring at age 59.	I hypothesise that higher second trimester maternal IL-6 levels are associated with reduced subiculum neurite density in offspring at age 59.	I hypothesise that higher first trimester maternal IL-6 levels are associated with reduced dentate gyrus neurite density in offspring at age 59.
10.1101/2024.10.04.616624	The FIP 1.0 Data Set: Highly Resolved Annotated Image Time Series of 4,000 Wheat Plots Grown in Six Years	Roth, L.; Boss, M.; Kirchgessner, N.; Aasen, H.; Aguirre-Cuellar, B. P.; Akiina, P. P. A.; Anderegg, J.; Gajardo Castillo, J.; Chen, X.; Corrado, S.; Cybulski, K.; Keller, B.; Kortstee, S. G.; Kronenberg, L.; Liebisch, F.; Nousi, P.; Oppliger, C.; Perich, G.; Pfeifer, J.; Yu, K.; Storni, N.; Tschurr, F.; Volpi, M.; Treier, S.; Zellweger, H.; Zumsteg, O.; Hund, A.; Walter, A.	plant biology	2025-11-03	3	https://www.biorxiv.org/content/10.1101/2024.10.04.616624v3	BackgroundUnderstanding genotype-environment interactions of plants is crucial for crop improvement, yet limited by the scarcity of quality phenotyping data. This data note presents the Field Phenotyping Platform 1.0 data set, a comprehensive resource for winter wheat research that combines imaging, trait, environmental, and genetic data. FindingsWe provide time series data for more than 4,000 wh…	["I hypothesise that earlier senescence ratings correlate with lower grain yield in wheat.", "I hypothesise that increased canopy cover at heading date predicts higher protein content."]	Q1: I hypothesise that earlier senescence ratings correlate with lower grain yield in wheat. Q2: I hypothesise that increased canopy cover at heading date predicts higher protein content.	I hypothesise that earlier senescence ratings correlate with lower grain yield in wheat.	I hypothesise that increased canopy cover at heading date predicts higher protein content.
10.1101/2024.11.25.625273	TimeFlies: an snRNA-seq aging clock for the fruit fly head sheds light on sex-biased aging	Tennant, N.; Pavuluri, A.; O'Connor-Giles, K. M.; Singh, G.; Larschan, E.; Singh, R.	genomics	25/01/2025	3	https://www.biorxiv.org/content/10.1101/2024.11.25.625273v3	Although multiple high-performing epigenetic aging clocks exist, few are based directly on gene expression. Such transcriptomic aging clocks allow us to extract age-associated genes directly. However, most existing transcriptomic clocks model a subset of genes and are limited in their ability to predict novel biomarkers. With the growing popularity of single-cell sequencing, there is a need for r…	["I hypothesise that loss of lncRNA:roX1 function in Drosophila melanogaster heads reduces lifespan.", "I hypothesise that sex-specific transcriptomic aging clocks in Drosophila heads reveal distinct age-related gene expression pathways.", "I hypothesise that lncRNAs are enriched among age-associated gene biomarkers in Drosophila melanogaster heads."]	Q1: I hypothesise that loss of lncRNA:roX1 function in Drosophila melanogaster heads reduces lifespan. Q2: I hypothesise that sex-specific transcriptomic aging clocks in Drosophila heads reveal distinct age-related gene expression pathways. Q3: I hypothesise that lncRNAs are enriched among age-associated gene biomarkers in Drosophila melanogaster heads.	I hypothesise that loss of lncRNA:roX1 function in Drosophila melanogaster heads reduces lifespan.	I hypothesise that sex-specific transcriptomic aging clocks in Drosophila heads reveal distinct age-related gene expression pathways.	I hypothesise that lncRNAs are enriched among age-associated gene biomarkers in Drosophila melanogaster heads.
10.1101/2024.08.07.606966	Histone Variant H3.3 Mediates DNA Repair and cGAS-STING Pathway Activation in Telomere Dysfunction	Huang, C.-M.; Chen, L.-Y.	molecular biology	2025-11-04	3	https://www.biorxiv.org/content/10.1101/2024.08.07.606966v3	The telomere damage response is a critical mechanism regulating human aging and disease progression. Deprotected telomeres activate the cytosolic DNA-sensing cGAS-STING pathway; however, the underlying mechanism remains unclear. Here, we discover that histone H3.3 is required for cGAS-STING pathway activation in cells with deprotected telomeres. Expression of the TRF2 dominant-negative mutant, TR…	["I hypothesise that depleting histone H3.3 will inhibit cGAS-STING pathway activation in response to telomere dysfunction.", "I hypothesise that histone H3.3 directly promotes telomere fusion events in senescent cells.", "I hypothesise that ATRX depletion will reduce cGAS-STING pathway activation in cells with telomere damage."]	Q1: I hypothesise that depleting histone H3.3 will inhibit cGAS-STING pathway activation in response to telomere dysfunction. Q2: I hypothesise that histone H3.3 directly promotes telomere fusion events in senescent cells. Q3: I hypothesise that ATRX depletion will reduce cGAS-STING pathway activation in cells with telomere damage.	I hypothesise that depleting histone H3.3 will inhibit cGAS-STING pathway activation in response to telomere dysfunction.	I hypothesise that histone H3.3 directly promotes telomere fusion events in senescent cells.	I hypothesise that ATRX depletion will reduce cGAS-STING pathway activation in cells with telomere damage.
10.1101/2024.08.28.610060	Does slow oscillation-spindle coupling contribute to sleep-dependent memory consolidation? A Bayesian meta-analysis	Ng, T.; Noh, E.; Spencer, R. M. C.	neuroscience	26/04/2025	3	https://www.biorxiv.org/content/10.1101/2024.08.28.610060v3	The active system consolidation theory suggests that information transfer between the hippocampus and cortex during sleep underlies memory consolidation. Neural oscillations during sleep, including the temporal coupling between slow oscillations (SO) and sleep spindles (SP), may play a mechanistic role in memory consolidation. However, differences in analytical approaches and the presence of phys…	[]	Q1: I hypothesise that stronger frontal SO-fast SP coupling is associated with better memory retention in younger adults compared to older adults. Q2: I hypothesise that increased SO-fast SP coupling strength in the frontal lobe predicts improved performance on declarative memory tasks. Q3: I hypothesise that higher frontal SO-fast SP coupling percentage is positively correlated with the degree o…	I hypothesise that stronger frontal SO-fast SP coupling is associated with better memory retention in younger adults compared to older adults.	I hypothesise that increased SO-fast SP coupling strength in the frontal lobe predicts improved performance on declarative memory tasks.	I hypothesise that higher frontal SO-fast SP coupling percentage is positively correlated with the degree of memory consolidation.
10.1101/2024.06.14.599053	The effects of 17ÃƒÅ½Ã‚Â±-estradiol treatment on endocrine system revealed by single-nucleus transcriptomic sequencing of hypothalamus	Li, L.; Wu, G.; Xu, X.; Yang, J.; Yi, L.; Yang, Z.; Mo, Z.; Xing, L.; Shan, Y.; Yu, Z.; Li, Y.	neuroscience	30/07/2025	3	https://www.biorxiv.org/content/10.1101/2024.06.14.599053v3	In this study, we investigated 17-estradiols role in lifespan extension from long-term administration. Pooled hypothalami from aged male Norway brown rats treated with 17-estradiol (O.T), aged male controls (O), and young male controls (Y) underwent single-nucleus transcriptomic sequencing (snRNA-seq). To evaluate the effects of 17-estradiol on aging neurons, supervised clustering of neurons base…	["I hypothesise 17ÃƒÅ½Ã‚Â±-estradiol treatment attenuates aging-induced decrease in synaptic formation pathways in hypothalamic neurons.", "I hypothesise 17ÃƒÅ½Ã‚Â±-estradiol treatment increases Gnrh1 expression, mediating its effects on energy homeostasis and stress response.", "I hypothesise 17ÃƒÅ½Ã‚Â±-estradiol treatment alters the activity of hypothalamic-pituitary-gonadal axis neurons in age…	Q1: I hypothesise 17ÃƒÅ½Ã‚Â±-estradiol treatment attenuates aging-induced decrease in synaptic formation pathways in hypothalamic neurons. Q2: I hypothesise 17ÃƒÅ½Ã‚Â±-estradiol treatment increases Gnrh1 expression, mediating its effects on energy homeostasis and stress response. Q3: I hypothesise 17ÃƒÅ½Ã‚Â±-estradiol treatment alters the activity of hypothalamic-pituitary-gonadal axis neurons in…	I hypothesise 17ÃƒÅ½Ã‚Â±-estradiol treatment attenuates aging-induced decrease in synaptic formation pathways in hypothalamic neurons.	I hypothesise 17ÃƒÅ½Ã‚Â±-estradiol treatment increases Gnrh1 expression, mediating its effects on energy homeostasis and stress response.	I hypothesise 17ÃƒÅ½Ã‚Â±-estradiol treatment alters the activity of hypothalamic-pituitary-gonadal axis neurons in aged male rats.
10.1101/2024.07.08.602575	Degradation in Binaural and Spatial Hearing, and Auditory Temporal Processing Abilities, as a Function of Aging	Sammeth, C. A.; Walker, K. A.; Greene, N. T.; Klug, A.; Tollin, D.	neuroscience	20/02/2025	3	https://www.biorxiv.org/content/10.1101/2024.07.08.602575v3	ObjectivesSensorineural hearing loss is common with advancing age, but even with normal or near-normal hearing in older persons, performance deficits are often seen for suprathreshold listening tasks such as understanding speech in background noise or localizing sound direction. This suggests there is also a more central source of the problem. Objectives of this study were to examine as a functio…	["I hypothesise that age-related decline in binaural temporal processing directly impairs spatial hearing acuity in older adults.", "I hypothesise that spectro-temporal processing deficits in middle-aged adults precede age-related spatial hearing impairments.", "I hypothesise that extended high-frequency hearing loss is a contributing factor, but not the sole cause, of age-related spatial hearing…	Q1: I hypothesise that age-related decline in binaural temporal processing directly impairs spatial hearing acuity in older adults. Q2: I hypothesise that spectro-temporal processing deficits in middle-aged adults precede age-related spatial hearing impairments. Q3: I hypothesise that extended high-frequency hearing loss is a contributing factor, but not the sole cause, of age-related spatial hea…	I hypothesise that age-related decline in binaural temporal processing directly impairs spatial hearing acuity in older adults.	I hypothesise that spectro-temporal processing deficits in middle-aged adults precede age-related spatial hearing impairments.	I hypothesise that extended high-frequency hearing loss is a contributing factor, but not the sole cause, of age-related spatial hearing decline.
10.1101/2024.07.24.604963	Muscle stem cells in Duchenne muscular dystrophy exhibit molecular impairments and altered cell fate trajectories impacting regenerative capacity	Granet, J. A.; Robertson, R.; Cusmano, A. A.; Filippelli, R. L.; Lorenz, T. O.; Li, S.; Yaqubi, M.; Stratton, J. A.; Chang, N. C.	cell biology	2025-05-05	3	https://www.biorxiv.org/content/10.1101/2024.07.24.604963v3	Satellite cells are muscle-resident stem cells that maintain and repair muscle. Increasing evidence supports the contributing role of satellite cells in Duchenne muscular dystrophy (DMD), a lethal degenerative muscle disease caused by loss of dystrophin. However, whether or not satellite cells exhibit dysfunction due to loss of dystrophin remains unresolved. Here, we used single cell RNA-sequenci…	["I hypothesise that DMD satellite cells exhibit increased apoptotic cell death compared to healthy satellite cells.", "I hypothesise that inducing autophagy rescues the impaired differentiation capacity of DMD satellite cells.", "I hypothesise that DMD satellite cells display altered cell fate trajectories leading to stalled differentiation."]	Q1: I hypothesise that DMD satellite cells exhibit increased apoptotic cell death compared to healthy satellite cells. Q2: I hypothesise that inducing autophagy rescues the impaired differentiation capacity of DMD satellite cells. Q3: I hypothesise that DMD satellite cells display altered cell fate trajectories leading to stalled differentiation.	I hypothesise that DMD satellite cells exhibit increased apoptotic cell death compared to healthy satellite cells.	I hypothesise that inducing autophagy rescues the impaired differentiation capacity of DMD satellite cells.	I hypothesise that DMD satellite cells display altered cell fate trajectories leading to stalled differentiation.
10.1101/2024.07.05.602288	Deep-diffeomorphic networks for conditional brain templates	Whitbread, L.; Laurenz, S.; Palmer, L. J.; Jenkinson, M.	neuroscience	2025-11-03	3	https://www.biorxiv.org/content/10.1101/2024.07.05.602288v3	Deformable brain templates are an important tool in many neuroimaging analyses. Conditional templates (e.g., age-specific templates) have advantages over single population templates by enabling improved registration accuracy and capturing common processes in brain development and degeneration. Conventional methods require large, evenly-spread cohorts to develop conditional templates, limiting the…	["I hypothesise that improved deep-diffeomorphic networks will more accurately capture age-related volumetric changes in specific brain structures.", "I hypothesise that incorporating additional conditioning parameters beyond age will enhance the accuracy of deep-diffeomorphic brain templates.", "I hypothesise that the geometric fidelity of deep-diffeomorphic templates correlates with improved re…	Q1: I hypothesise that improved deep-diffeomorphic networks will more accurately capture age-related volumetric changes in specific brain structures. Q2: I hypothesise that incorporating additional conditioning parameters beyond age will enhance the accuracy of deep-diffeomorphic brain templates. Q3: I hypothesise that the geometric fidelity of deep-diffeomorphic templates correlates with improve…	I hypothesise that improved deep-diffeomorphic networks will more accurately capture age-related volumetric changes in specific brain structures.	I hypothesise that incorporating additional conditioning parameters beyond age will enhance the accuracy of deep-diffeomorphic brain templates.	I hypothesise that the geometric fidelity of deep-diffeomorphic templates correlates with improved registration accuracy in ageing brain scans.
10.1101/2024.07.05.602082	Frontal Theta Oscillations and Cognitive Flexibility: Age-Related Modulations in EEG Activity	Darna, M.; Stolz, C.; Jauch, H. S.; Strumpf, H.; Hopf, J. M.; Seidenbecher, C. I.; Schott, B. H.; Richter, A.	neuroscience	14/05/2025	3	https://www.biorxiv.org/content/10.1101/2024.07.05.602082v3	Cognitive flexibility, the ability to adapt ones behaviour in changing environments, declines during aging. Electroencephalography (EEG) studies have implicated midfrontal theta oscillations in attentional set-shifting, a measure of cognitive flexibility. Little is known about the electrocortical underpinnings of set-shifting in aging. Here, we investigated aging effects on set-shifting performan…	["I hypothesise older adults exhibit reduced midfrontal theta power during cognitive flexibility tasks compared to young adults.", "I hypothesise increased shift difficulty leads to greater RT variability in older adults than young adults.", "I hypothesise young adults show greater midfrontal theta power modulation with increasing shift difficulty than older adults."]	Q1: I hypothesise older adults exhibit reduced midfrontal theta power during cognitive flexibility tasks compared to young adults. Q2: I hypothesise increased shift difficulty leads to greater RT variability in older adults than young adults. Q3: I hypothesise young adults show greater midfrontal theta power modulation with increasing shift difficulty than older adults.	I hypothesise older adults exhibit reduced midfrontal theta power during cognitive flexibility tasks compared to young adults.	I hypothesise increased shift difficulty leads to greater RT variability in older adults than young adults.	I hypothesise young adults show greater midfrontal theta power modulation with increasing shift difficulty than older adults.
10.1101/2024.09.12.612759	Age-dependent Changes in a Chaperone Complex in the Mouse Heart	Bhat, P. D.; Nalli, A.; Shoemaker, L.; Kwong, J. Q.; Krishnamurthy, P.; Benian, G. M.	cell biology	27/08/2025	3	https://www.biorxiv.org/content/10.1101/2024.09.12.612759v3	The exquisitely organized sarcomere, the unit of contraction of striated muscle, is a stable structure with slow turnover of its components. The myosin chaperone UNC-45 and its binding partners, Hsp90 and Hsp70, are required for the initial folding of the myosin head domain and the assembly of myosin into thick filaments. There is increasing evidence that the UNC-45 system has an important role d…	["I hypothesise that reduced Unc-45b protein levels in aging mouse hearts cause decreased myosin heavy chain protein levels.", "I hypothesise that decreased Hsp70 protein levels in aging mouse hearts contribute to age-dependent cardiomyopathies.", "I hypothesise that Unc-45b mRNA levels decline with age in mouse hearts, but Hsp70 protein levels decline independently of mRNA."]	Q1: I hypothesise that reduced Unc-45b protein levels in aging mouse hearts cause decreased myosin heavy chain protein levels. Q2: I hypothesise that decreased Hsp70 protein levels in aging mouse hearts contribute to age-dependent cardiomyopathies. Q3: I hypothesise that Unc-45b mRNA levels decline with age in mouse hearts, but Hsp70 protein levels decline independently of mRNA.	I hypothesise that reduced Unc-45b protein levels in aging mouse hearts cause decreased myosin heavy chain protein levels.	I hypothesise that decreased Hsp70 protein levels in aging mouse hearts contribute to age-dependent cardiomyopathies.	I hypothesise that Unc-45b mRNA levels decline with age in mouse hearts, but Hsp70 protein levels decline independently of mRNA.
10.1101/2024.09.11.612427	Autophagy across tissues of aging mice	Carosi, J. M.; Martin, A.; Hein, L. K.; Hassiotis, S.; Hattersley, K. J.; Turner, B. J.; Fourrier, C.; Bensalem, J.; Sargeant, T. J.	cell biology	25/02/2025	3	https://www.biorxiv.org/content/10.1101/2024.09.11.612427v3	Autophagy is a waste-disposal pathway that protects against age-related pathology. It is widely accepted that autophagy declines with age, yet the role that sex and diet-related obesity play during aging remain unknown. Here, we present the most comprehensive in vivo study of autophagic flux to date. We employed transgenic mice overexpressing tandem-florescent LC3B (RFP-GFP-LC3B) to measure autop…	["I hypothesise that male mice aged 18 months will have lower autophagic flux in the heart than male mice aged 6 months.", "I hypothesise that female mice aged 18 months will show no significant difference in motor cortex autophagic flux compared to female mice aged 6 months.", "I hypothesise that high-fat diet will decrease autophagic flux in the heart of male mice aged 12 months."]	Q1: I hypothesise that male mice aged 18 months will have lower autophagic flux in the heart than male mice aged 6 months. Q2: I hypothesise that female mice aged 18 months will show no significant difference in motor cortex autophagic flux compared to female mice aged 6 months. Q3: I hypothesise that high-fat diet will decrease autophagic flux in the heart of male mice aged 12 months.	I hypothesise that male mice aged 18 months will have lower autophagic flux in the heart than male mice aged 6 months.	I hypothesise that female mice aged 18 months will show no significant difference in motor cortex autophagic flux compared to female mice aged 6 months.	I hypothesise that high-fat diet will decrease autophagic flux in the heart of male mice aged 12 months.
10.1101/2024.08.30.609895	Membrane transporter Progressive Ankylosis Protein Homolog (ANKH/Ank) partially mediates senescence-derived extracellular citrate and is regulated by DNA damage, inflammation and ageing.	James, E. N.; Teh, M.-T.; Li, Y.; Wagner-bock, C.; Al-Khateeb, Z. F.; Karen-Ng, L. P.; Roberts, T.; Synchyshyn, L.; Lewis, A.; O'Loghlen, A.; Silver, A.; Michael-Titus, A. T.; Bennett, M.; Bundy, J. G.; Mycielska, M. E.; Parkinson, E. K.	cell biology	19/02/2025	3	https://www.biorxiv.org/content/10.1101/2024.08.30.609895v3	A considerable body of recent evidence supports citrate transport as a major regulator of organismal lifespan and healthspan. Citrate accumulates outside senescent cells in vitro and in vivo. However, the detailed mechanism of senescent cell extracellular citrate (EC) accumulation is not clear. We show here that EC is partially mediated by a newly described plasma membrane citrate transporter ANK…	[]	Q1: I hypothesise that ANKH transporter activity directly correlates with extracellular citrate levels in senescent fibroblasts. Q2: I hypothesise that inhibiting ANKH reduces senescence-associated inflammation markers in aged tissues. Q3: I hypothesise that telomere dysfunction upregulates ANKH expression in senescent cells.	I hypothesise that ANKH transporter activity directly correlates with extracellular citrate levels in senescent fibroblasts.	I hypothesise that inhibiting ANKH reduces senescence-associated inflammation markers in aged tissues.	I hypothesise that telomere dysfunction upregulates ANKH expression in senescent cells.
10.1101/2023.01.19.524624	Aging reduces motivation through decreased Bdnf expression in the ventral tegmental area	Lei, H. C.; Parker, K. E.; Kuo, C.-C.; Yuede, C. M.; McCall, J. G.; Imai, S.-i.	neuroscience	2025-10-03	3	https://www.biorxiv.org/content/10.1101/2023.01.19.524624v3	Age-associated reduced motivation is a hallmark of neuropsychiatric disorders in the elderly. In our rapidly aging societies, it is critical to keep motivation levels high enough to promote healthspan and lifespan. However, how motivation is reduced during aging remains unknown. Here, we used multiple mouse models to evaluate motivation and related affective states in young and old mice. We also …	["I hypothesise that restoring Bdnf expression in the ventral tegmental area of aged mice will increase their motivation for effortful activities.", "I hypothesise that decreased Bdnf expression in the ventral tegmental area is the primary cause of age-related motivation decline in mice.", "I hypothesise that social isolation in young mice will not decrease motivation as much as aging does, despi…	Q1: I hypothesise that restoring Bdnf expression in the ventral tegmental area of aged mice will increase their motivation for effortful activities. Q2: I hypothesise that decreased Bdnf expression in the ventral tegmental area is the primary cause of age-related motivation decline in mice. Q3: I hypothesise that social isolation in young mice will not decrease motivation as much as aging does, d…	I hypothesise that restoring Bdnf expression in the ventral tegmental area of aged mice will increase their motivation for effortful activities.	I hypothesise that decreased Bdnf expression in the ventral tegmental area is the primary cause of age-related motivation decline in mice.	I hypothesise that social isolation in young mice will not decrease motivation as much as aging does, despite both reducing motivation.
10.1101/2023.07.04.547676	Severe Osteoarthritis in Aged PANX3 Knockout Mice: Implications for a Novel Primary Osteoarthritis Model	Wakefield, B.; Tang, J.; Balanta Melo, J.; Hutchinson, J. L.; Kanji, R.; Herold, G.; O'Donnell, B. L.; Brooks, C.; Kiser, P.; Grol, M.; Seguin, C. A.; Plotkin, L. I.; Beier, F.; Penuela, S.	physiology	2025-03-02	3	https://www.biorxiv.org/content/10.1101/2023.07.04.547676v3	Osteoarthritis (OA) is a multi-factorial disease associated with aging. As the molecular mechanisms underpinning the pathogenesis of this disease are unclear, there are no disease-modifying drugs to combat OA. Pannexin 3 (PANX3) has been shown to promote cartilage loss during posttraumatic OA. In contrast, the ablation of Panx3 in male mice results in spontaneous full-thickness cartilage lesions …	["I hypothesise that Panx3 deficiency in aged mice leads to increased inflammatory cytokine expression in synovial tissue.", "I hypothesise that Panx3 deficiency in aged mice causes increased chondrocyte apoptosis in articular cartilage.", "I hypothesise that Panx3 deficiency in aged mice results in altered extracellular matrix composition in articular cartilage."]	Q1: I hypothesise that Panx3 deficiency in aged mice leads to increased inflammatory cytokine expression in synovial tissue. Q2: I hypothesise that Panx3 deficiency in aged mice causes increased chondrocyte apoptosis in articular cartilage. Q3: I hypothesise that Panx3 deficiency in aged mice results in altered extracellular matrix composition in articular cartilage.	I hypothesise that Panx3 deficiency in aged mice leads to increased inflammatory cytokine expression in synovial tissue.	I hypothesise that Panx3 deficiency in aged mice causes increased chondrocyte apoptosis in articular cartilage.	I hypothesise that Panx3 deficiency in aged mice results in altered extracellular matrix composition in articular cartilage.
10.1101/2024.02.01.578331	DoliClock: A Lipid-Based Aging Clock Reveals Accelerated Aging in Neurological Disorders	Latumalea, D.; Unfried, M.; Barardo, D. G.; Gruber, J.; Kennedy, B. K.	neuroscience	25/02/2025	3	https://www.biorxiv.org/content/10.1101/2024.02.01.578331v3	Aging is a multifaceted process influenced by intrinsic and extrinsic factors, with lipid alterations playing a critical role in brain aging and neurological disorders. This study introduces DoliClock, a lipid-based biological aging clock designed to predict the age of the prefrontal cortex using post-mortem lipidomic data. Significant age acceleration was observed in samples with autism, schizop…	["I hypothesise that increased dolichol-19 levels in the prefrontal cortex are associated with accelerated biological aging in individuals with autism.", "I hypothesise that elevated mevalonate pathway dysregulation leads to increased dolichol accumulation and thus accelerated brain aging.", "I hypothesise that higher lipid entropy in the prefrontal cortex correlates with increased chronological …	Q1: I hypothesise that increased dolichol-19 levels in the prefrontal cortex are associated with accelerated biological aging in individuals with autism. Q2: I hypothesise that elevated mevalonate pathway dysregulation leads to increased dolichol accumulation and thus accelerated brain aging. Q3: I hypothesise that higher lipid entropy in the prefrontal cortex correlates with increased chronologi…	I hypothesise that increased dolichol-19 levels in the prefrontal cortex are associated with accelerated biological aging in individuals with autism.	I hypothesise that elevated mevalonate pathway dysregulation leads to increased dolichol accumulation and thus accelerated brain aging.	I hypothesise that higher lipid entropy in the prefrontal cortex correlates with increased chronological age in neurological disorders.
10.1101/2024.01.30.577900	Proteasome-dependent Orc6 removal from chromatin upon S-phase entry safeguards against MCM reloading and tetraploidy	Hayashi-Takanaka, Y.; Hiratani, I.; Haraguchi, T.; Hiraoka, Y.	cell biology	13/05/2025	3	https://www.biorxiv.org/content/10.1101/2024.01.30.577900v3	DNA replication is tightly regulated to occur only once per cell cycle, as untimely re-initiation can lead to aneuploidy, which is associated with early senescence and cancer. The pre-replication complex (comprising Orc1-6, Cdc6, Cdt1, and MCM) is essential for the initiation of DNA replication, but the dynamics and function of Orc6 during the cell cycle remain elusive. Here, we demonstrate that …	["I hypothesise that proteasome inhibition in aging cells will increase Orc6 chromatin binding and lead to tetraploidy.", "I hypothesise that reduced proteasome activity in senescent cells will cause premature Orc6 dissociation from chromatin.", "I hypothesise that inhibiting Orc6 proteasomal degradation will accelerate cellular senescence by promoting tetraploidy."]	Q1: I hypothesise that proteasome inhibition in aging cells will increase Orc6 chromatin binding and lead to tetraploidy. Q2: I hypothesise that reduced proteasome activity in senescent cells will cause premature Orc6 dissociation from chromatin. Q3: I hypothesise that inhibiting Orc6 proteasomal degradation will accelerate cellular senescence by promoting tetraploidy.	I hypothesise that proteasome inhibition in aging cells will increase Orc6 chromatin binding and lead to tetraploidy.	I hypothesise that reduced proteasome activity in senescent cells will cause premature Orc6 dissociation from chromatin.	I hypothesise that inhibiting Orc6 proteasomal degradation will accelerate cellular senescence by promoting tetraploidy.
10.1101/2023.06.14.544948	Hexokinase regulates Mondo-mediated longevity via the PPP and organellar dynamics	Laboy, R.; Ndoci, M.; Tabrez, S. S.; Vonolfen, M.; Ballhysa, E.; Droth, T.; Schilling, K.; Loehrke, A.; Atanassov, I.; Antebi, A.	cell biology	15/05/2025	3	https://www.biorxiv.org/content/10.1101/2023.06.14.544948v3	The transcriptional complex Mondo/Max-like, MML-1/MXL-2, acts as a convergent transcriptional regulatory output of multiple longevity pathways in Caenorhabditis elegans. These transcription factors coordinate nutrient sensing with carbohydrate and lipid metabolism across the evolutionary spectrum. While most studies have focused on the downstream outputs, little is known about the upstream inputs…	["I hypothesise that hxk-1 knockdown in C. elegans abolishes germline longevity by disrupting mitochondrial beta-oxidation.", "I hypothesise that hxk-2 knockdown in C. elegans abolishes germline longevity by disrupting the pentose phosphate pathway.", "I hypothesise that inhibiting the pentose phosphate pathway in mammalian cells rescues MondoA nuclear translocation upon starvation."]	Q1: I hypothesise that hxk-1 knockdown in C. elegans abolishes germline longevity by disrupting mitochondrial beta-oxidation. Q2: I hypothesise that hxk-2 knockdown in C. elegans abolishes germline longevity by disrupting the pentose phosphate pathway. Q3: I hypothesise that inhibiting the pentose phosphate pathway in mammalian cells rescues MondoA nuclear translocation upon starvation.	I hypothesise that hxk-1 knockdown in C. elegans abolishes germline longevity by disrupting mitochondrial beta-oxidation.	I hypothesise that hxk-2 knockdown in C. elegans abolishes germline longevity by disrupting the pentose phosphate pathway.	I hypothesise that inhibiting the pentose phosphate pathway in mammalian cells rescues MondoA nuclear translocation upon starvation.
10.1101/2022.10.17.512236	Spatiotemporal dynamics of RAD51C between the Golgi and nucleus regulates homologous recombination and genomic stability.	Galea, G.; Kuodyte, K.; Khan, M. M.; Thul, P. J.; Neumann, B.; Lundberg, E.; Pepperkok, R.	cell biology	2025-09-01	3	https://www.biorxiv.org/content/10.1101/2022.10.17.512236v3	AbstractIntra-organelle communication is essential for cellular homeostasis, but the coordination between nuclear processes and cytoplasmic compartments remains poorly understood. Here, we uncover a novel spatiotemporal regulatory pathway linking the Golgi complex to the nucleus upon DNA damage. We show key DNA repair proteins, including RAD51C, dynamically shuttle between these organelles in res…	["I hypothesise that inhibiting Giantin at the Golgi will increase RAD51C nuclear localization and impair homologous recombination.", "I hypothesise that disrupting Golgi-RAD51C interaction will lead to increased genomic instability in aging cells.", "I hypothesise that premature RAD51C nuclear entry will accelerate cellular senescence."]	Q1: I hypothesise that inhibiting Giantin at the Golgi will increase RAD51C nuclear localization and impair homologous recombination. Q2: I hypothesise that disrupting Golgi-RAD51C interaction will lead to increased genomic instability in aging cells. Q3: I hypothesise that premature RAD51C nuclear entry will accelerate cellular senescence.	I hypothesise that inhibiting Giantin at the Golgi will increase RAD51C nuclear localization and impair homologous recombination.	I hypothesise that disrupting Golgi-RAD51C interaction will lead to increased genomic instability in aging cells.	I hypothesise that premature RAD51C nuclear entry will accelerate cellular senescence.
10.1101/2023.10.09.561466	Telomeres control human telomerase (hTERT) expression through non-telomeric TRF2	Sengupta, A.; Vinayagamurthy, S.; Soni, D.; Deb, R.; Mukherjee, A. K.; Dutta, S.; Jaiswal, J.; Yadav, M.; Sharma, S.; Bagri, S.; Roy, S. S.; Poonia, P.; Singh, A.; Khanna, D.; Bhatt, A. K.; Sharma, A.; Saurav, S.; Motiani, R. K.; Chowdhury, S.	cancer biology	13/05/2025	3	https://www.biorxiv.org/content/10.1101/2023.10.09.561466v3	The function of the human telomerase reverse transcriptase (hTERT) in the synthesis and maintenance of chromosome ends, or telomeres, is widely understood. Whether and how telomeres, on the other hand, influence hTERT regulation is relatively less studied. We found hTERT was transcriptionally altered depending on telomere length (TL). This resulted from TL-dependent binding of TRF2 between telome…	["I hypothesise that increasing telomere length will decrease TRF2 binding to the hTERT promoter.", "I hypothesise that TRF2 binding to the hTERT promoter directly correlates with H3K27 trimethylation levels.", "I hypothesise that reducing TRF2 levels will lead to increased hTERT expression independent of telomere length."]	Q1: I hypothesise that increasing telomere length will decrease TRF2 binding to the hTERT promoter. Q2: I hypothesise that TRF2 binding to the hTERT promoter directly correlates with H3K27 trimethylation levels. Q3: I hypothesise that reducing TRF2 levels will lead to increased hTERT expression independent of telomere length.	I hypothesise that increasing telomere length will decrease TRF2 binding to the hTERT promoter.	I hypothesise that TRF2 binding to the hTERT promoter directly correlates with H3K27 trimethylation levels.	I hypothesise that reducing TRF2 levels will lead to increased hTERT expression independent of telomere length.
10.1101/2023.08.13.553128	Age-associated failure of efficient cardiac proteostatic adaptations to chronic cAMP-stress is associated with accelerated heart aging	Perino, M. G.; Calvo-Rubio Barrera, M.; Riordon, D.; Agnetti, G.; Tarasov, K.; Parveen, A.; Chakir, K.; Morrell, C.; Ahmet, I.; Lyashkov, A.; Lukyanenko, Y.; Tarasova, Y.; Qu, J.; Kadioglu, H.; Ranek, M.; deCabo, R.; Lakatta, E.	cell biology	20/02/2025	3	https://www.biorxiv.org/content/10.1101/2023.08.13.553128v3	Dysregulated proteostasis, leading to accumulation of misfolded proteins, electron-dense aggregates (lipofuscin, LF), preamyloid oligomers (PAOs), and proteotoxic stress is a hallmark of aging. We investigated how efficiently proteostatic adaptations to chronic cardiac cyclic adenosine monophosphate (cAMP)-dependent stress change with aging in mice harboring marked, cardiac-specific over-expressi…	["I hypothesise that chronic cAMP-stress accelerates cardiac aging by impairing proteasome activity in aged mice.", "I hypothesise that increased autophagic flux in young TGAC8 mice protects against cardiac aging.", "I hypothesise that impaired mitophagy in aged TGAC8 mice contributes to cardiac proteostatic failure."]	Q1: I hypothesise that chronic cAMP-stress accelerates cardiac aging by impairing proteasome activity in aged mice. Q2: I hypothesise that increased autophagic flux in young TGAC8 mice protects against cardiac aging. Q3: I hypothesise that impaired mitophagy in aged TGAC8 mice contributes to cardiac proteostatic failure.	I hypothesise that chronic cAMP-stress accelerates cardiac aging by impairing proteasome activity in aged mice.	I hypothesise that increased autophagic flux in young TGAC8 mice protects against cardiac aging.	I hypothesise that impaired mitophagy in aged TGAC8 mice contributes to cardiac proteostatic failure.
10.1101/2023.09.19.558536	The association between resting state aperiodic activity and Research Domain Criteria Social Processes in young neurotypical adults	Ford, T. C.; Hill, A. T.; Parrella, N.-F.; Kirkovski, M.; Donaldson, P.; Enticott, P. G.	neuroscience	23/05/2025	3	https://www.biorxiv.org/content/10.1101/2023.09.19.558536v3	The aperiodic exponent of the electrophysiological signal has been utilised to demonstrate differences in brain excitation-inhibition in ageing, cognition, and neuro- and psycho-pathology. Furthermore, excitation-inhibition imbalance has been associated with social communication difficulties in clinical and non-clinical cohorts. No work to date, however, has explored the association between aperi…	["I hypothesise that increased aperiodic exponent in resting state EEG predicts poorer social communication in young adults.", "I hypothesise that aperiodic exponent in the left social brain is associated with social responsiveness in young adults."]	Q1: I hypothesise that increased aperiodic exponent in resting state EEG predicts poorer social communication in young adults. Q2: I hypothesise that aperiodic exponent in the left social brain is associated with social responsiveness in young adults.	I hypothesise that increased aperiodic exponent in resting state EEG predicts poorer social communication in young adults.	I hypothesise that aperiodic exponent in the left social brain is associated with social responsiveness in young adults.
10.1101/2023.08.29.555167	Human Bone Marrow Adipose Tissue is a Hematopoietic Niche for Leptin-DrivenMonopoiesis	Loureiro, Z. Y.; Samant, A.; Desai, A.; DeSouza, T.; Cirka, H.; Ceesay, M.; Kostyra, D.; Joyce, S.; Khair, L.; Solivan-Rivera, J.; Ziegler, R.; Ketelut Carneiro, N.; Tsai, L. A.; Brehm, M.; Messina, L. M.; Fitzgerald, K. A.; Rosen, E.; Corvera, S.; Nguyen, T. T.	developmental biology	25/03/2025	2	https://www.biorxiv.org/content/10.1101/2023.08.29.555167v2	During aging, adipose tissue within the bone marrow expands while the trabecular red marrow contracts. The impact of these changes on blood cell formation remains unclear. To address this question, we performed single-cell and single-nuclei transcriptomic analysis on adipose-rich yellow bone marrow (BMY) and adipose-poor trabecular red marrow (BMR) from human subjects undergoing lower limb amputa…	["I hypothesise that increased bone marrow adipose tissue with age directly correlates with elevated pro-inflammatory monocyte production.", "I hypothesise that blocking leptin signaling in bone marrow organoids will reduce monocyte progenitor proliferation.", "I hypothesise that human bone marrow adipose tissue contains a distinct hematopoietic stem/progenitor cell population responsive to lepti…	Q1: I hypothesise that increased bone marrow adipose tissue with age directly correlates with elevated pro-inflammatory monocyte production. Q2: I hypothesise that blocking leptin signaling in bone marrow organoids will reduce monocyte progenitor proliferation. Q3: I hypothesise that human bone marrow adipose tissue contains a distinct hematopoietic stem/progenitor cell population responsive to l…	I hypothesise that increased bone marrow adipose tissue with age directly correlates with elevated pro-inflammatory monocyte production.	I hypothesise that blocking leptin signaling in bone marrow organoids will reduce monocyte progenitor proliferation.	I hypothesise that human bone marrow adipose tissue contains a distinct hematopoietic stem/progenitor cell population responsive to leptin.
10.1101/2023.08.25.554832	Niche-specific macrophage loss promotes skin capillary aging	Mesa, K. R.; O'Connor, K. A.; Ng, C.; Salvatore, S.; Dolynuk, A.; Rivera Lomeli, M.; Littman, D. R.	immunology	2025-03-01	2	https://www.biorxiv.org/content/10.1101/2023.08.25.554832v2	All mammalian organs depend upon resident macrophage populations to coordinate repair processes and facilitate tissue-specific functions1-3. Recent work has established that functionally distinct macrophage populations reside in discrete tissue niches and are replenished through some combination of local proliferation and monocyte recruitment4,5. Moreover, decline in macrophage abundance and func…	["I hypothesise that restoring capillary-associated macrophage numbers in aged skin will improve capillary blood flow.", "I hypothesise that colony stimulating factor 1 (CSF1) administration will increase skin capillary-associated macrophage proliferation and density in aged mice.", "I hypothesise that loss of capillary-associated macrophages in aged skin directly impairs vascular repair after in…	Q1: I hypothesise that restoring capillary-associated macrophage numbers in aged skin will improve capillary blood flow. Q2: I hypothesise that colony stimulating factor 1 (CSF1) administration will increase skin capillary-associated macrophage proliferation and density in aged mice. Q3: I hypothesise that loss of capillary-associated macrophages in aged skin directly impairs vascular repair afte…	I hypothesise that restoring capillary-associated macrophage numbers in aged skin will improve capillary blood flow.	I hypothesise that colony stimulating factor 1 (CSF1) administration will increase skin capillary-associated macrophage proliferation and density in aged mice.	I hypothesise that loss of capillary-associated macrophages in aged skin directly impairs vascular repair after injury.
10.1101/2023.08.02.551614	Cellular Senescence Affects ECM Regulation in COPD Lung Tissue	Woldhuis, R. R.; Bekker, N. J.; Nijnatten, J. L. L.; Banchero, M.; Kooistra, W.; Wolters, K. J. C.; Horvatovich, P. L.; Guryev, V.; van den Berge, M.; Timens, W.; Brandsma, C.-A.	pathology	27/05/2025	2	https://www.biorxiv.org/content/10.1101/2023.08.02.551614v2	RationaleHigher levels of senescence have been demonstrated in COPD patients, including severe early onset (SEO)-COPD. Recently we demonstrated a link between senescence and extracellular matrix (ECM) dysregulation in lung fibroblasts. Whether this in vitro observation also translates in vivo has not been shown yet. ObjectivesTo determine whether senescence can contribute to COPD-associated ECM-r…	["I hypothesise that increased p21 expression in COPD lung fibroblasts directly causes altered ADAMTS1 levels.", "I hypothesise that p21-correlated ECM gene dysregulation in COPD lung tissue is reversed by senolytic treatment."]	Q1: I hypothesise that increased p21 expression in COPD lung fibroblasts directly causes altered ADAMTS1 levels. Q2: I hypothesise that p21-correlated ECM gene dysregulation in COPD lung tissue is reversed by senolytic treatment.	I hypothesise that increased p21 expression in COPD lung fibroblasts directly causes altered ADAMTS1 levels.	I hypothesise that p21-correlated ECM gene dysregulation in COPD lung tissue is reversed by senolytic treatment.
10.1101/2023.07.31.551097	Region-Specific Transcriptional Signatures of Brain Aging in the Absence of Neuropathology at the Single-cell Level	Mesecar, M. E.; Duffy, M. F.; Acri, D. J.; Ding, J.; Langston, R. G.; Shah, S. I.; Nalls, M. A.; Reed, X.; Scholz, S. W.; Whitaker, D. T.; Auluck, P. K.; Marenco, S.; DeCasien, A. R.; Gibbs, J. R.; Cookson, M. R.	neuroscience	19/08/2025	2	https://www.biorxiv.org/content/10.1101/2023.07.31.551097v2	Given that age is a significant risk factor for multiple neurodegenerative diseases, investigating normal brain aging may help identify molecular events that may contribute to increased disease risk over time. Single-nucleus RNA sequencing (snRNA-seq) enables analysis of gene expression changes within specific cell-types, potentially offering insights into the molecular mechanisms underlying agin…	["I hypothesise that proteostasis gene expression changes in entorhinal cortex neurons are region-specific markers of aging.", "I hypothesise that inflammation-related gene expression in putamen microglia is altered by aging.", "I hypothesise that vesicular trafficking gene expression in subventricular zone astrocytes differs between young and aged brains."]	Q1: I hypothesise that proteostasis gene expression changes in entorhinal cortex neurons are region-specific markers of aging. Q2: I hypothesise that inflammation-related gene expression in putamen microglia is altered by aging. Q3: I hypothesise that vesicular trafficking gene expression in subventricular zone astrocytes differs between young and aged brains.	I hypothesise that proteostasis gene expression changes in entorhinal cortex neurons are region-specific markers of aging.	I hypothesise that inflammation-related gene expression in putamen microglia is altered by aging.	I hypothesise that vesicular trafficking gene expression in subventricular zone astrocytes differs between young and aged brains.
10.1101/2025.01.30.635658	Nora virus proliferates in dividing intestinal stem cells and sensitizes flies to intestinal infection and oxidative stress	Franchet, A.; Haller, S.; Yamba, M.; Barbier, V.; Vieira, A.; Leclerc, V.; Becker, S.; Lee, K.-Z.; Orlov, I.; Spehner, D.; Daeffler, L.; Ferrandon, D.	immunology	2025-04-02	2	https://www.biorxiv.org/content/10.1101/2025.01.30.635658v2	The digestive tract represents the most complex interface of an organism with its biotope. Food may be contaminated by pathogens and toxicants while an abundant and complex microbiota strives in the gut lumen. The organism must defend itself against potentially noxious biotic or abiotic stresses while preserving its microbiota, provided it plays a beneficial role. The presence of intestinal virus…	["I hypothesise Nora virus infection accelerates intestinal aging in Drosophila.", "I hypothesise Nora virus proliferation in ISCs impairs intestinal barrier function.", "I hypothesise Nora virus sensitizes aged flies to oxidative stress via enterocyte disruption."]	Q1: I hypothesise Nora virus infection accelerates intestinal aging in Drosophila. Q2: I hypothesise Nora virus proliferation in ISCs impairs intestinal barrier function. Q3: I hypothesise Nora virus sensitizes aged flies to oxidative stress via enterocyte disruption.	I hypothesise Nora virus infection accelerates intestinal aging in Drosophila.	I hypothesise Nora virus proliferation in ISCs impairs intestinal barrier function.	I hypothesise Nora virus sensitizes aged flies to oxidative stress via enterocyte disruption.
10.1101/2025.01.31.635920	AMP-activated protein kinase (AMPK) is essential for tendon homeostasis and prevents premature senescence and ectopic calcification	Hold, L. A.; Migotsky, N.; Chen, J.; Steltzer, S. S.; Cordts, P.; Bae, S.-H.; Grossman, S.; Lamia, S.; Phillips, T.; O'Meara, M. J.; Davis, C. S.; Brooks, S. V.; Akbar, M.; Millar, N. L.; Killian, M. L.; Abraham, A. C.	pathology	2025-09-04	2	https://www.biorxiv.org/content/10.1101/2025.01.31.635920v2	Tendinopathy is a debilitating tendon disorder affecting millions of people, characterized by pain, swelling, and diminished biomechanical properties. While the precise mechanisms underlying tendon homeostasis remain unclear, metabolic regulation plays a critical role. In this study, we combine transcriptomic analysis of human tendinopathic samples with a conditional mouse model in which Prkaa1 (…	["I hypothesise that AMPK1 deletion in tendon progenitors accelerates cellular senescence and ectopic calcification in tendons.", "I hypothesise that voluntary exercise partially reverses AMPK1 deficiency-induced tendon senescence and ECM disorganization.", "I hypothesise that downregulation of mitochondrial electron transport chain genes in human tendinopathy is linked to AMPK signaling loss."]	Q1: I hypothesise that AMPK1 deletion in tendon progenitors accelerates cellular senescence and ectopic calcification in tendons. Q2: I hypothesise that voluntary exercise partially reverses AMPK1 deficiency-induced tendon senescence and ECM disorganization. Q3: I hypothesise that downregulation of mitochondrial electron transport chain genes in human tendinopathy is linked to AMPK signaling loss.	I hypothesise that AMPK1 deletion in tendon progenitors accelerates cellular senescence and ectopic calcification in tendons.	I hypothesise that voluntary exercise partially reverses AMPK1 deficiency-induced tendon senescence and ECM disorganization.	I hypothesise that downregulation of mitochondrial electron transport chain genes in human tendinopathy is linked to AMPK signaling loss.
10.1101/2023.04.07.536059	New ÃƒÅ½Ã¢â‚¬Â_x009d_246p53 isoform responds to DNA damage to enhance p53 functions in senescence and tumour suppression	Parkar, S. N.; Ramalho, A. C.; Lopez-Iniesta, M. J.; Kimura, K.; Zhao, J.; da Silva Rita, F.; Romao, L.; Candeias, M. M.	cancer biology	18/04/2025	2	https://www.biorxiv.org/content/10.1101/2023.04.07.536059v2	p53 is with little doubt one of the most powerful genes in our genome, as it makes growth vs arrest, repair vs replacement, metabolism vs anabolism, life vs death decisions in the cell. An alteration or malfunction in p53 may lead to cancer or premature ageing. So, it is not surprising that p53 is also one of the most complex and tightly regulated genes. p53 alone encodes for at least 10 RNA vari…	["I hypothesise that increased expression of ÃƒÅ½Ã¢â‚¬Â_x009d_246p53 accelerates cellular senescence following DNA damage.", "I hypothesise that ÃƒÅ½Ã¢â‚¬Â_x009d_246p53 directly inhibits Hdm2 protein levels in response to DNA damage.", "I hypothesise that ÃƒÅ½Ã¢â‚¬Â_x009d_246p53 promotes p21 gene expression independently of full-length p53."]	Q1: I hypothesise that increased expression of ÃƒÅ½Ã¢â‚¬Â_x009d_246p53 accelerates cellular senescence following DNA damage. Q2: I hypothesise that ÃƒÅ½Ã¢â‚¬Â_x009d_246p53 directly inhibits Hdm2 protein levels in response to DNA damage. Q3: I hypothesise that ÃƒÅ½Ã¢â‚¬Â_x009d_246p53 promotes p21 gene expression independently of full-length p53.	I hypothesise that increased expression of ÃƒÅ½Ã¢â‚¬Â_x009d_246p53 accelerates cellular senescence following DNA damage.	I hypothesise that ÃƒÅ½Ã¢â‚¬Â_x009d_246p53 directly inhibits Hdm2 protein levels in response to DNA damage.	I hypothesise that ÃƒÅ½Ã¢â‚¬Â_x009d_246p53 promotes p21 gene expression independently of full-length p53.
10.1101/2023.03.27.534444	Proteostasis and lysosomal repair deficits in transdifferentiated neurons of Alzheimer's disease	Chou, C.-C.; Vest, R.; Prado, M. A.; Wilson-Grady, J.; Paulo, J. A.; Shibuya, Y.; Moran-Losada, P.; Lee, T.-T.; Luo, J.; Gygi, S. P.; Kelly, J. W.; Finley, D.; Wernig, M.; Wyss-Coray, T.; Frydman, J.	cell biology	13/01/2025	2	https://www.biorxiv.org/content/10.1101/2023.03.27.534444v2	Aging is the most prominent risk factor for Alzheimers disease (AD). However, the cellular mechanisms linking neuronal proteostasis decline to the characteristic aberrant protein deposits in AD brains remain elusive. Here, we develop transdifferentiated neurons (tNeurons) from human dermal fibroblasts as a neuronal model that retains aging hallmarks and exhibits AD-linked vulnerabilities. Remarka…	["I hypothesise that impaired lysosomal repair mechanisms in aged neurons directly contribute to proteotoxic deposit accumulation.", "I hypothesise that lysosomal damage in aging neurons exacerbates A{beta} deposition in Alzheimer's disease.", "I hypothesise that enhancing ESCRT-mediated lysosomal repair in aged neurons will reduce inflammatory cytokine secretion."]	Q1: I hypothesise that impaired lysosomal repair mechanisms in aged neurons directly contribute to proteotoxic deposit accumulation. Q2: I hypothesise that lysosomal damage in aging neurons exacerbates A{beta} deposition in Alzheimer's disease. Q3: I hypothesise that enhancing ESCRT-mediated lysosomal repair in aged neurons will reduce inflammatory cytokine secretion.	I hypothesise that impaired lysosomal repair mechanisms in aged neurons directly contribute to proteotoxic deposit accumulation.	I hypothesise that lysosomal damage in aging neurons exacerbates A{beta} deposition in Alzheimer's disease.	I hypothesise that enhancing ESCRT-mediated lysosomal repair in aged neurons will reduce inflammatory cytokine secretion.
10.1101/2023.03.07.531502	ACRC/GCNA is an essential protease that repairs DNA-protein crosslinks during vertebrate development	Otten, C.; Kutnjak, M.; Supina-Pavic, C.; Anticevic, I.; Medved, V.; Popovic, M.	developmental biology	13/05/2025	2	https://www.biorxiv.org/content/10.1101/2023.03.07.531502v2	DNA-protein crosslinks (DPCs) are toxic DNA lesions that block all DNA transactions including replication and transcription, and the consequences of impaired DNA-Protein Crosslink Repair (DPCR) are severe. At the cellular level, impaired DPCR leads to the formation of double strand breaks, genomic instability and cell death, while at the organismal level, it is associated with cancer, aging and n…	["I hypothesise that impaired ACRC/GCNA activity accelerates cellular senescence in adult zebrafish tissues.", "I hypothesise that increased DNA-protein crosslinks due to ACRC/GCNA deficiency contribute to age-related neurodegeneration in zebrafish.", "I hypothesise that ACRC/GCNA activity is inversely correlated with markers of aging in adult zebrafish."]	Q1: I hypothesise that impaired ACRC/GCNA activity accelerates cellular senescence in adult zebrafish tissues. Q2: I hypothesise that increased DNA-protein crosslinks due to ACRC/GCNA deficiency contribute to age-related neurodegeneration in zebrafish. Q3: I hypothesise that ACRC/GCNA activity is inversely correlated with markers of aging in adult zebrafish.	I hypothesise that impaired ACRC/GCNA activity accelerates cellular senescence in adult zebrafish tissues.	I hypothesise that increased DNA-protein crosslinks due to ACRC/GCNA deficiency contribute to age-related neurodegeneration in zebrafish.	I hypothesise that ACRC/GCNA activity is inversely correlated with markers of aging in adult zebrafish.
10.1101/2021.07.11.451986	Chronological lifespan extension and nucleotide salvage inhibition in yeast by isonicotinamide supplementation	Kalita, A.; Letai, C. T.; Hesles, E. E.; Power, L. N.; Mishra, S.; Saha, S.; Dinda, M.; Wang, D.; Singh, P. K.; Smith, J. S.	biochemistry	24/06/2025	2	https://www.biorxiv.org/content/10.1101/2021.07.11.451986v2	Isonicotinamide (INAM) is an isomer of the NAD+ precursor nicotinamide (NAM) that stimulates the enzymatic activity of Sir2, an NAD+-dependent histone deacetylase from the budding yeast, Saccharomyces cerevisiae. Supplementing INAM into growth media promotes the replicative lifespan (RLS) of this single cell organism by maintaining intracellular NAD+ homeostasis. INAM also extends yeast chronolog…	["I hypothesise that isonicotinamide extends yeast chronological lifespan by inhibiting nucleotide salvage enzymes Sdt1 and Phm8.", "I hypothesise that isonicotinamide-induced nucleotide depletion triggers a hormetic stress response that enhances yeast quiescence during aging.", "I hypothesise that isonicotinamide's inhibition of nucleotide salvage pathways leads to increased intracellular NMN an…	Q1: I hypothesise that isonicotinamide extends yeast chronological lifespan by inhibiting nucleotide salvage enzymes Sdt1 and Phm8. Q2: I hypothesise that isonicotinamide-induced nucleotide depletion triggers a hormetic stress response that enhances yeast quiescence during aging. Q3: I hypothesise that isonicotinamide's inhibition of nucleotide salvage pathways leads to increased intracellular NM…	I hypothesise that isonicotinamide extends yeast chronological lifespan by inhibiting nucleotide salvage enzymes Sdt1 and Phm8.	I hypothesise that isonicotinamide-induced nucleotide depletion triggers a hormetic stress response that enhances yeast quiescence during aging.	I hypothesise that isonicotinamide's inhibition of nucleotide salvage pathways leads to increased intracellular NMN and NAD+ levels, promoting longevity.
10.1101/789065	Indian Wellderly exomes underscore NRAP roles in elderly hypertrophic cardiomyopathy	Chimata, P.; Ankit, S.; Agrawal, R.; Rao, V. J.; Koranchery, R.; Rajendran, R.; Mohanan, K. S.; Shenthar, J.; Bazrafshan, S.; Sadayappan, S.; Ahamed, H.; Dhandapany, P. S.	genomics	30/01/2025	2	https://www.biorxiv.org/content/10.1101/789065v2	Hypertrophic cardiomyopathy (HCM) is a genetic disorder that affects people of all ages, with the elderly population being inadequately studied. It is primarily caused by gene variants that encode proteins involved in the structure and function of the heart muscle. The identification of genes associated with elderly HCM requires ethnic-specific genomic sequences from Wellderly individuals. Curren…	["I hypothesise that NRAP variants identified in the Indian Wellderly cohort cause hypertrophic cardiomyopathy by reducing interactions with KLHL41.", "I hypothesise that reduced NRAP interaction with -actinin leads to impaired myofibril assembly in elderly hypertrophic cardiomyopathy.", "I hypothesise that the i-DHANS database will identify novel genes associated with age-related cardiovascular …	Q1: I hypothesise that NRAP variants identified in the Indian Wellderly cohort cause hypertrophic cardiomyopathy by reducing interactions with KLHL41. Q2: I hypothesise that reduced NRAP interaction with -actinin leads to impaired myofibril assembly in elderly hypertrophic cardiomyopathy. Q3: I hypothesise that the i-DHANS database will identify novel genes associated with age-related cardiovascu…	I hypothesise that NRAP variants identified in the Indian Wellderly cohort cause hypertrophic cardiomyopathy by reducing interactions with KLHL41.	I hypothesise that reduced NRAP interaction with -actinin leads to impaired myofibril assembly in elderly hypertrophic cardiomyopathy.	I hypothesise that the i-DHANS database will identify novel genes associated with age-related cardiovascular diseases in the Indian population.
10.1101/2024.09.10.612283	Multi-ancestry GWAS reveals loci linked to human variation in LINE-1- and Alu-insertion numbers	Bravo, J. I.; Zhang, L.; Benayoun, B. A.	genomics	27/01/2025	2	https://www.biorxiv.org/content/10.1101/2024.09.10.612283v2	LINE-1 (L1) and Alu are two families of transposable elements (TEs) occupying [~]17% and [~]11% of the human genome, respectively. Though only a small fraction of L1 copies is able to produce the machinery to mobilize autonomously, Alu and degenerate L1s can hijack their functional machinery and mobilize in trans. The expression and subsequent mobilization of L1 and Alu can exert pathological eff…	["I hypothesise that increased LINE-1 or Alu element activity is associated with cellular senescence.", "I hypothesise that genetic variants regulating LINE-1 or Alu expression influence human longevity."]	Q1: I hypothesise that increased LINE-1 or Alu element activity is associated with cellular senescence. Q2: I hypothesise that genetic variants regulating LINE-1 or Alu expression influence human longevity.	I hypothesise that increased LINE-1 or Alu element activity is associated with cellular senescence.	I hypothesise that genetic variants regulating LINE-1 or Alu expression influence human longevity.
10.1101/2024.08.19.608305	An estimate of the longitudinal pace of aging from a single brain scan predicts dementia conversion, morbidity, and mortality	Whitman, E. T.; Elliott, M. L.; Knodt, A. R.; Abraham, W. C.; Anderson, T. J.; Cutfield, N.; Hogan, S.; Ireland, D.; Melzer, T. R.; Ramrakha, S.; Sugden, K.; Theodore, R.; Williams, B. S.; Caspi, A.; Moffitt, T. E.; Hariri, A. R.; Alzheimer's Disease Neuroimaging Initiative,	neuroscience	23/04/2025	2	https://www.biorxiv.org/content/10.1101/2024.08.19.608305v2	To understand how aging affects functional decline and increases disease risk, it is necessary to develop accurate and reliable measures of how fast a person is aging. Epigenetic clocks measure aging but require DNA methylation data, which many studies lack. Using data from the Dunedin Study, we introduce an accurate and reliable measure for the rate of longitudinal aging derived from cross-secti…	["I hypothesise that a faster DunedinPACNI score will predict increased cellular senescence markers in peripheral blood.", "I hypothesise that interventions shown to slow biological aging will reduce DunedinPACNI in longitudinal studies.", "I hypothesise that DunedinPACNI will correlate with epigenetic age acceleration in individuals."]	Q1: I hypothesise that a faster DunedinPACNI score will predict increased cellular senescence markers in peripheral blood. Q2: I hypothesise that interventions shown to slow biological aging will reduce DunedinPACNI in longitudinal studies. Q3: I hypothesise that DunedinPACNI will correlate with epigenetic age acceleration in individuals.	I hypothesise that a faster DunedinPACNI score will predict increased cellular senescence markers in peripheral blood.	I hypothesise that interventions shown to slow biological aging will reduce DunedinPACNI in longitudinal studies.	I hypothesise that DunedinPACNI will correlate with epigenetic age acceleration in individuals.
10.1101/2024.08.04.606499	Computational model for synthesizing auditory brainstem responses to assess neuronal alterations in aging and autistic animal models	Li, B.-Z.; Poleg, S.; Ridenour, M.; Tollin, D.; Lei, T.; Klug, A.	neuroscience	2025-11-03	2	https://www.biorxiv.org/content/10.1101/2024.08.04.606499v2	PurposeThe auditory brainstem response (ABR) is a widely used objective electrophysiology measure for non-invasively assessing auditory function and neural activity in the auditory brainstem, but its ability to reflect detailed neuronal processing is limited due to the averaging nature of the electroencephalogram-type recordings. MethodThis study addresses this limitation by developing a computat…	["I hypothesise that myelin deficits in the auditory brainstem cause decreased wave III amplitude and prolonged wave III-V interval in aging animals.", "I hypothesise that reduced activity in the medial nucleus of the trapezoid body contributes to ABR waveform alterations in aging."]	Q1: I hypothesise that myelin deficits in the auditory brainstem cause decreased wave III amplitude and prolonged wave III-V interval in aging animals. Q2: I hypothesise that reduced activity in the medial nucleus of the trapezoid body contributes to ABR waveform alterations in aging.	I hypothesise that myelin deficits in the auditory brainstem cause decreased wave III amplitude and prolonged wave III-V interval in aging animals.	I hypothesise that reduced activity in the medial nucleus of the trapezoid body contributes to ABR waveform alterations in aging.
10.1101/2024.10.21.619562	The spatio-temporal dynamics of phoneme encoding in aging and aphasia	Kries, J.; Vandermosten, M.; Gwilliams, L.	neuroscience	2025-02-09	2	https://www.biorxiv.org/content/10.1101/2024.10.21.619562v2	During successful language comprehension, speech sounds (phonemes) are encoded within a series of neural patterns that evolve over time. Here we tested whether these neural dynamics of speech encoding are altered for individuals with a language disorder. We recorded EEG responses from individuals with post-stroke aphasia and healthy age-matched controls (i.e., older adults) during 25 minutes of n…	[]	Q1: I hypothesise that healthy older adults maintain phonetic encoding longer than individuals with aphasia when word identity is uncertain. Q2: I hypothesise that phonetic encoding strength over left-lateralized electrodes is reduced in aphasia compared to healthy age-matched controls.	I hypothesise that healthy older adults maintain phonetic encoding longer than individuals with aphasia when word identity is uncertain.	I hypothesise that phonetic encoding strength over left-lateralized electrodes is reduced in aphasia compared to healthy age-matched controls.
10.1101/2024.07.06.602307	Improvement of human donor retinal ganglion cell survival through modulation of microglia	Malechka, V. V.; Phay, M. H.; Augustine, J.; Kriukov, E.; Rivera, J. D.; Alt, C.; Gregory-Ksander, M.; Baranov, P.	cell biology	20/05/2025	2	https://www.biorxiv.org/content/10.1101/2024.07.06.602307v2	Stem cell-derived retinal ganglion cell transplantation therapy offers a promising avenue for restoring vision in patients with significant retinal ganglion cell loss. The major challenge in this therapeutic approach is ensuring the survival of transplanted human donor retinal ganglion cells within the host retina. Here, we demonstrated the pivotal role of host retinal microglia and macrophages i…	["I hypothesise that annexin V pretreatment of donor retinal ganglion cells increases their survival in host retinas.", "I hypothesise that soluble Fas ligand pretreatment of donor retinal ganglion cells increases their survival in host retinas.", "I hypothesise that activated host retinal microglia phagocytose transplanted donor retinal ganglion cells."]	Q1: I hypothesise that annexin V pretreatment of donor retinal ganglion cells increases their survival in host retinas. Q2: I hypothesise that soluble Fas ligand pretreatment of donor retinal ganglion cells increases their survival in host retinas. Q3: I hypothesise that activated host retinal microglia phagocytose transplanted donor retinal ganglion cells.	I hypothesise that annexin V pretreatment of donor retinal ganglion cells increases their survival in host retinas.	I hypothesise that soluble Fas ligand pretreatment of donor retinal ganglion cells increases their survival in host retinas.	I hypothesise that activated host retinal microglia phagocytose transplanted donor retinal ganglion cells.
10.1101/2024.07.05.601643	SOX21 Suppresses Glioblastoma Growth by Repressing AP-1 Activity	Muhr, J.; Rrapaj, E.; Yuan, J.; Kurtsdotter, I.; Misyurin, V.; Baselli, G.; Persson, O.; Bergsland, M.	cancer biology	2025-02-03	2	https://www.biorxiv.org/content/10.1101/2024.07.05.601643v2	BackgroundTreatment-resistant glioblastoma stem cells (GSCs) drive glioblastoma (GBM) growth and recurrence. Thus, targeting the molecular machinery that sustains GSCs in an undifferentiated and self-renewing state is a promising therapeutic strategy. The transcription factor SOX21 effectively suppresses the tumorigenic capacity of GSCs. However, the mechanism by which SOX21 impedes GSC features …	["I hypothesise that SOX21 expression induces cellular senescence in glioblastoma stem cells.", "I hypothesise that AP-1 activity promotes cellular senescence in glioblastoma stem cells.", "I hypothesise that inhibiting AP-1 activity in glioblastoma stem cells extends organismal lifespan."]	Q1: I hypothesise that SOX21 expression induces cellular senescence in glioblastoma stem cells. Q2: I hypothesise that AP-1 activity promotes cellular senescence in glioblastoma stem cells. Q3: I hypothesise that inhibiting AP-1 activity in glioblastoma stem cells extends organismal lifespan.	I hypothesise that SOX21 expression induces cellular senescence in glioblastoma stem cells.	I hypothesise that AP-1 activity promotes cellular senescence in glioblastoma stem cells.	I hypothesise that inhibiting AP-1 activity in glioblastoma stem cells extends organismal lifespan.
10.1101/2024.06.22.600215	Exosomes Released from Senescent Cells and Circulatory Exosomes Isolated from Human Plasma Reveal Aging-associated Proteomic and Lipid Signatures	Patel, S. K.; Bons, J.; Rose, J. P.; Chappel, J. R.; Beres, R. L.; Watson, M.; Webster, C.; Burton, J. B.; Bruderer, R.; Desprez, P. Y.; Reiter, L.; Campisi, J.; Baker, E.; Schilling, B.	cell biology	22/03/2025	2	https://www.biorxiv.org/content/10.1101/2024.06.22.600215v2	Senescence emerged as significant mechanism of aging and age-related diseases, offering an attractive target for clinical interventions. Senescent cells release a senescence-associated secretory phenotype (SASP), including exosomes that may act as signal transducers between distal tissues, propagating secondary or bystander senescence and signaling throughout the body. However, the composition of…	[]	Q1: I hypothesise that increased levels of SERPINs in plasma exosomes correlate with cellular senescence burden in older individuals. Q2: I hypothesise that elevated phosphatidylcholine levels in plasma exosomes are indicative of increased cellular membrane changes due to aging. Q3: I hypothesise that Reelin levels in plasma exosomes are significantly lower in older individuals compared to younge…	I hypothesise that increased levels of SERPINs in plasma exosomes correlate with cellular senescence burden in older individuals.	I hypothesise that elevated phosphatidylcholine levels in plasma exosomes are indicative of increased cellular membrane changes due to aging.	I hypothesise that Reelin levels in plasma exosomes are significantly lower in older individuals compared to younger individuals.
10.1101/2024.06.17.598893	The GTPase-activating protein CG42795 is a potent neuronal regulator of ageing in Drosophila melanogaster	Falcsik, G.; Keresztes, F.; Balod, T. M.; Kovacs, T.	genetics	2025-10-02	2	https://www.biorxiv.org/content/10.1101/2024.06.17.598893v2	Macroautophagy (hereafter referred to as autophagy) is an important self-renewal process in our cells, whereby potentially harmful cellular components are encapsulated within a double-membrane autophagosome and subsequently fused with a lysosome for degradation by acidic hydrolases. This lysosomal degradation process is essential for maintaining cellular homeostasis. Dysfunctional autophagy can l…	[]	Q1: I hypothesise that neuronal silencing of CG42795 in Drosophila melanogaster enhances autophagy. Q2: I hypothesise that neuronal silencing of CG42795 in Drosophila melanogaster prolongs lifespan. Q3: I hypothesise that neuronal silencing of CG42795 in Drosophila melanogaster improves locomotor ability.	I hypothesise that neuronal silencing of CG42795 in Drosophila melanogaster enhances autophagy.	I hypothesise that neuronal silencing of CG42795 in Drosophila melanogaster prolongs lifespan.	I hypothesise that neuronal silencing of CG42795 in Drosophila melanogaster improves locomotor ability.
10.1101/2024.06.15.599168	Changes in Higuchi's fractal dimension across age in healthy human EEG are anti-correlated with changes in oscillatory power and 1/f slope	Aggarwal, S.; Ray, S.	neuroscience	2025-04-05	2	https://www.biorxiv.org/content/10.1101/2024.06.15.599168v2	Non-linear dynamical methods such as Higuchis fractal dimension (HFD) are often used to study the complexities of brain activity. In human electroencephalogram (EEG), while power in the gamma band (30-70 Hz) and the slope of the power spectral density (PSD) have been shown to reduce with healthy aging, there are conflicting findings regarding how HFD and other measures of complexity vary with agi…	["I hypothesise that increased Higuchi's fractal dimension in human EEG with age is inversely correlated with the 1/f slope of the power spectral density.", "I hypothesise that stimulus-induced changes in Higuchi's fractal dimension are negatively correlated with changes in gamma band oscillatory power.", "I hypothesise that Higuchi's fractal dimension can predict age-related changes in brain com…	Q1: I hypothesise that increased Higuchi's fractal dimension in human EEG with age is inversely correlated with the 1/f slope of the power spectral density. Q2: I hypothesise that stimulus-induced changes in Higuchi's fractal dimension are negatively correlated with changes in gamma band oscillatory power. Q3: I hypothesise that Higuchi's fractal dimension can predict age-related changes in brain…	I hypothesise that increased Higuchi's fractal dimension in human EEG with age is inversely correlated with the 1/f slope of the power spectral density.	I hypothesise that stimulus-induced changes in Higuchi's fractal dimension are negatively correlated with changes in gamma band oscillatory power.	I hypothesise that Higuchi's fractal dimension can predict age-related changes in brain complexity better than spectral power and 1/f slope alone.
10.1101/2024.06.14.599109	Functional Hierarchy of the Human Neocortex from Cradle to Grave	Taylor, H. P.; Huynh, K. M.; Thung, K.-H.; Lin, G.; Lyu, W.; Lin, W.; Ahmad, S.; Yap, P.-T.	neuroscience	2025-02-03	2	https://www.biorxiv.org/content/10.1101/2024.06.14.599109v2	Recent evidence indicates that the organization of the human neocortex is underpinned by smooth spatial gradients of functional connectivity (FC). These gradients provide crucial in-sight into the relationship between the brains topographic organization and the texture of human cognition. However, no studies to date have charted how intrinsic FC gradient archi-tecture develops across the entire h…	["I hypothesise that the decrease in global gradient measures of FC differentiation and complexity from 30 to 100 years is associated with cellular senescence in neocortical neurons.", "I hypothesise that the observed increase in global markers of hierarchical organization from birth to early adulthood is driven by the maturation of neuronal networks and precedes significant cellular senescence."…	Q1: I hypothesise that the decrease in global gradient measures of FC differentiation and complexity from 30 to 100 years is associated with cellular senescence in neocortical neurons. Q2: I hypothesise that the observed increase in global markers of hierarchical organization from birth to early adulthood is driven by the maturation of neuronal networks and precedes significant cellular senescenc…	I hypothesise that the decrease in global gradient measures of FC differentiation and complexity from 30 to 100 years is associated with cellular senescence in neocortical neurons.	I hypothesise that the observed increase in global markers of hierarchical organization from birth to early adulthood is driven by the maturation of neuronal networks and precedes significant cellular senescence.	I hypothesise that interventions targeting cellular senescence in the neocortex will reverse the age-related decrease in FC differentiation and complexity.
10.1101/2024.06.13.598792	Electrophysiology and Morphology of Human Cortical Supragranular Pyramidal Cells in a Wide Age Range	Barzo, P.; Szots, I.; Toth, M.; Csajbok, E. A.; Molnar, G.; Tamas, G.	neuroscience	2025-06-01	2	https://www.biorxiv.org/content/10.1101/2024.06.13.598792v2	The basic excitatory neurons of the cerebral cortex, the pyramidal cells, are the most important signal integrators for the local circuit. They have quite characteristic morphological and electrophysiological properties that are known to be largely constant with age in the young and adult cortex. However, the brain undergoes several dynamic changes throughout life, such as in the phases of early …	["I hypothesise that supragranular pyramidal cells become less excitable with age after early development.", "I hypothesise that dendritic spine shape distribution in supragranular pyramidal cells differs significantly between infantile and aged individuals."]	Q1: I hypothesise that supragranular pyramidal cells become less excitable with age after early development. Q2: I hypothesise that dendritic spine shape distribution in supragranular pyramidal cells differs significantly between infantile and aged individuals.	I hypothesise that supragranular pyramidal cells become less excitable with age after early development.	I hypothesise that dendritic spine shape distribution in supragranular pyramidal cells differs significantly between infantile and aged individuals.
10.1101/2024.06.12.598646	A mechanism for telomere-specific telomere length regulation	Teplitz, G. M.; Pasquier, E.; Bonnell, E.; De Laurentiis, E.; Bartle, L.; Lucier, J.-F.; Dawson, D. S.; Wellinger, R. J.	molecular biology	2025-08-07	2	https://www.biorxiv.org/content/10.1101/2024.06.12.598646v2	Telomere length is a critical determinant of telomere function and hence chromosome stability. Critically short telomeres induce cellular senescence and division arrest, which eventually may lead to devastating age-related degenerative diseases. Conversely, maintenance of telomere length is a hallmark of cancer. How telomere set-length is established and molecular mechanisms for telomere-specific…	["I hypothesise that increased Sir4 abundance on subtelomeric heterochromatin directly causes telomere-specific set-length maintenance.", "I hypothesise that the distal 15 kb of TEL03L contains cis-acting elements that confer telomere-specific set-length regulation.", "I hypothesise that Tbf1 mutations disrupt telomere boundary elements, leading to increased Sir4 binding and longer telomere set-l…	Q1: I hypothesise that increased Sir4 abundance on subtelomeric heterochromatin directly causes telomere-specific set-length maintenance. Q2: I hypothesise that the distal 15 kb of TEL03L contains cis-acting elements that confer telomere-specific set-length regulation. Q3: I hypothesise that Tbf1 mutations disrupt telomere boundary elements, leading to increased Sir4 binding and longer telomere s…	I hypothesise that increased Sir4 abundance on subtelomeric heterochromatin directly causes telomere-specific set-length maintenance.	I hypothesise that the distal 15 kb of TEL03L contains cis-acting elements that confer telomere-specific set-length regulation.	I hypothesise that Tbf1 mutations disrupt telomere boundary elements, leading to increased Sir4 binding and longer telomere set-lengths.
10.1101/2024.06.10.598273	Genetic and Environmental Contributions to Epigenetic Aging Across Adolescence and Young Adulthood	Kuznetsov, D. V.; Liu, Y.; Schowe, A. M.; Czamara, D.; Instinske, J.; Pahnke, C. K. L.; Noethen, M. M.; Spinath, F. M.; Binder, E. B.; Diewald, M.; Forstner, A. J.; Kandler, C.; Moenkediek, B.	genomics	28/02/2025	2	https://www.biorxiv.org/content/10.1101/2024.06.10.598273v2	BackgroundEpigenetic aging estimators commonly track chronological and biological aging, quantifying its accumulation (i.e., epigenetic age acceleration) or speed (i.e., epigenetic aging pace). Their scores reflect a combination of inherent biological programming and the impact of environmental factors, which are suggested to vary at different life stages. The transition from adolescence to adult…	["I hypothesise that unique environmental factors explain more variance in epigenetic aging in older young adults than in adolescents.", "I hypothesise that genetic contributions to epigenetic aging variance increase with age during adolescence and young adulthood.", "I hypothesise that epigenetic aging estimators trained on adult samples show greater genetic variance in older young adults."]	Q1: I hypothesise that unique environmental factors explain more variance in epigenetic aging in older young adults than in adolescents. Q2: I hypothesise that genetic contributions to epigenetic aging variance increase with age during adolescence and young adulthood. Q3: I hypothesise that epigenetic aging estimators trained on adult samples show greater genetic variance in older young adults.	I hypothesise that unique environmental factors explain more variance in epigenetic aging in older young adults than in adolescents.	I hypothesise that genetic contributions to epigenetic aging variance increase with age during adolescence and young adulthood.	I hypothesise that epigenetic aging estimators trained on adult samples show greater genetic variance in older young adults.
10.1101/2024.09.11.611691	Lack of cortistatin exacerbates neuroimmune and vascular dysfunction in ischemic stroke	Castillo Gonzalez, J.; Vargas Rodriguez, P.; Serrano Martinez, I.; Cuenca-Martagon, A.; Forte-Lago, I.; Price, M.; Buscemi, L.; Hirt, L.; Jose Luis, R.; Gonzalez-Rey, E.	immunology	22/07/2025	2	https://www.biorxiv.org/content/10.1101/2024.09.11.611691v2	Ischemic stroke remains a leading cause of mortality and disability worldwide, with few therapies addressing its complex pathophysiology. Neuroinflammation, blood-brain barrier disruption, and immune dysregulation contribute to acute damage and long-term decline. Cortistatin, an immunomodulatory neuropeptide, has shown therapeutic benefit in acute stroke, though its endogenous role during onset a…	["I hypothesise that cortistatin deficiency accelerates age-related vascular dysfunction after ischemic stroke.", "I hypothesise that cortistatin administration reduces neuroinflammation in aged mice post-stroke.", "I hypothesise that cortistatin levels decline with age in brain tissue following ischemic stroke."]	Q1: I hypothesise that cortistatin deficiency accelerates age-related vascular dysfunction after ischemic stroke. Q2: I hypothesise that cortistatin administration reduces neuroinflammation in aged mice post-stroke. Q3: I hypothesise that cortistatin levels decline with age in brain tissue following ischemic stroke.	I hypothesise that cortistatin deficiency accelerates age-related vascular dysfunction after ischemic stroke.	I hypothesise that cortistatin administration reduces neuroinflammation in aged mice post-stroke.	I hypothesise that cortistatin levels decline with age in brain tissue following ischemic stroke.
10.1101/2024.09.13.612812	The SET1/COMPASS subunit RBBP5 orchestrates epigenetic control of global proteostasis and the 12h oscillator to safeguard metabolic and cellular homeostasis	Kubra, S.; Sun, M.; Dion, W.; Catak, A.; Luong, H.; Wang, H.; Pan, Y.; Liu, J.-J.; Ponna, A.; Sipula, I.; Jurczak, M. J.; Liu, S.; Zhu, B.	cell biology	2025-03-04	2	https://www.biorxiv.org/content/10.1101/2024.09.13.612812v2	Proteostasis is vital for cellular health, with disruptions leading to aging, neurodegeneration and metabolic disorders. Traditionally, proteotoxic stress responses were studied as acute reactions to various noxious factors; however, recent evidence reveals that many proteostasis genes exhibit [~]12h ultradian rhythms under physiological conditions in mammals, driven by an XBP1s-dependent 12h osc…	["I hypothesise that RBBP5 deficiency accelerates cellular senescence in mammalian cells.", "I hypothesise that restoring RBBP5 expression in aged mice improves proteostasis and reduces inflammation.", "I hypothesise that disruption of the 12h proteostasis oscillator by RBBP5 loss leads to premature aging phenotypes."]	Q1: I hypothesise that RBBP5 deficiency accelerates cellular senescence in mammalian cells. Q2: I hypothesise that restoring RBBP5 expression in aged mice improves proteostasis and reduces inflammation. Q3: I hypothesise that disruption of the 12h proteostasis oscillator by RBBP5 loss leads to premature aging phenotypes.	I hypothesise that RBBP5 deficiency accelerates cellular senescence in mammalian cells.	I hypothesise that restoring RBBP5 expression in aged mice improves proteostasis and reduces inflammation.	I hypothesise that disruption of the 12h proteostasis oscillator by RBBP5 loss leads to premature aging phenotypes.
10.1101/2024.10.14.616343	Perivascular and parenchymal fluid characteristics are related to age and cognitive performance across the lifespan	Lynch, K. M.; Custer, R. M.; Sepehrband, F.; Toga, A. W.; Choupan, J.	neuroscience	27/02/2025	2	https://www.biorxiv.org/content/10.1101/2024.10.14.616343v2	Perivascular spaces (PVS) play a critical role in fluid transfer and waste clearance in the brain, but few studies have explored how alterations to perivascular fluid flow may impact brain maturation and behavior across the lifespan. This study aims to characterize age-related alterations to perivascular and parenchymal fluid flow characteristics across the lifespan in typically developing childr…	["I hypothesise that increased perivascular free water diffusion is associated with poorer cognitive performance in aging adults.", "I hypothesise that age-related changes in perivascular fluid flow accelerate waste clearance impairment.", "I hypothesise that altered parenchymal fluid diffusion with distance from PVS contributes to age-related cognitive decline."]	Q1: I hypothesise that increased perivascular free water diffusion is associated with poorer cognitive performance in aging adults. Q2: I hypothesise that age-related changes in perivascular fluid flow accelerate waste clearance impairment. Q3: I hypothesise that altered parenchymal fluid diffusion with distance from PVS contributes to age-related cognitive decline.	I hypothesise that increased perivascular free water diffusion is associated with poorer cognitive performance in aging adults.	I hypothesise that age-related changes in perivascular fluid flow accelerate waste clearance impairment.	I hypothesise that altered parenchymal fluid diffusion with distance from PVS contributes to age-related cognitive decline.
10.1101/2024.10.11.617862	Therapeutic effects of PDGF-AB/BB against cellular senescence in human intervertebral disc	Zhang, C.; Diaz-Hernandez, M. E.; Fukunaga, T.; Shenoy, S.; Yoon, S. T.; Haglund, L.; Drissi, H.	cell biology	27/03/2025	2	https://www.biorxiv.org/content/10.1101/2024.10.11.617862v2	Cellular senescence, characterized by a permanent state of cell cycle arrest and a secretory phenotype contributing to inflammation and tissue deterioration, has emerged as a target for age-related interventions. Accumulation of senescent cells is closely linked with intervertebral disc (IVD) degeneration, a prevalent age-dependent chronic disorder causing low back pain. Previous studies have hig…	[]	Q1: I hypothesise PDGF-AB/BB treatment reduces SA-ÃƒÅ½Ã‚Â²-Gal activity in senescent human intervertebral disc cells. Q2: I hypothesise PDGF-AB/BB treatment decreases P21 and P16 expression in senescent human intervertebral disc cells. Q3: I hypothesise PDGF-AB/BB treatment increases cell population in S phase in senescent human intervertebral disc cells.	I hypothesise PDGF-AB/BB treatment reduces SA-ÃƒÅ½Ã‚Â²-Gal activity in senescent human intervertebral disc cells.	I hypothesise PDGF-AB/BB treatment decreases P21 and P16 expression in senescent human intervertebral disc cells.	I hypothesise PDGF-AB/BB treatment increases cell population in S phase in senescent human intervertebral disc cells.
10.1101/2024.09.28.615585	Tracing Cellular Senescence in Bone: Time-Dependent Changes in Osteocyte Cytoskeleton Mechanics and Morphology	Tilton, M.; Liao, J.; Kim, C.; Shaygani, H.; Astudillo Potes, M.; Cordova, D.; Kirkland, J. L.; Miller, K.	biophysics	26/01/2025	2	https://www.biorxiv.org/content/10.1101/2024.09.28.615585v2	Aging-related bone loss significantly impacts the growing elderly population globally, leading to debilitating conditions such as osteoporosis. Senescent osteocytes play a crucial role in the aging process of bone. This longitudinal study examines the impact of continuous local and paracrine exposure to senescence-associated secretory phenotype (SASP) factors on senescence-associated biophysical …	["I hypothesise that increased F-actin area in osteocytes directly correlates with increased cytoskeletal stiffening.", "I hypothesise that local SASP factor accumulation causes greater osteocyte dendritic integrity decline than paracrine SASP exposure.", "I hypothesise that pro-inflammatory cytokine levels in osteocytes are positively correlated with cytoskeletal stiffening."]	Q1: I hypothesise that increased F-actin area in osteocytes directly correlates with increased cytoskeletal stiffening. Q2: I hypothesise that local SASP factor accumulation causes greater osteocyte dendritic integrity decline than paracrine SASP exposure. Q3: I hypothesise that pro-inflammatory cytokine levels in osteocytes are positively correlated with cytoskeletal stiffening.	I hypothesise that increased F-actin area in osteocytes directly correlates with increased cytoskeletal stiffening.	I hypothesise that local SASP factor accumulation causes greater osteocyte dendritic integrity decline than paracrine SASP exposure.	I hypothesise that pro-inflammatory cytokine levels in osteocytes are positively correlated with cytoskeletal stiffening.
10.1101/2024.09.14.613007	A redox switch in p21-CDK feedback during G2 phase controls the proliferation-cell cycle exit decision	Vorhauser, J.; Roumeliotis, T. I.; Coupe, D.; Leung, J. K.; Yu, L.; Bohlig, K.; Zerjatke, T.; Glauche, I.; Nadler, A.; Choudhary, J. S.; Mansfeld, J.	cell biology	2025-08-08	2	https://www.biorxiv.org/content/10.1101/2024.09.14.613007v2	Reactive oxygen species (ROS) influence cell proliferation and fate decisions by oxidizing cysteine residues (S-sulfenylation) of proteins, but specific targets and underlying regulatory mechanisms remain poorly defined. Here, we employ redox proteomics to identify cell cycle-coordinated S-sulfenylation events and investigate their functional role in proliferation control. Although ROS levels ris…	["I hypothesise that p21 C41 oxidation promotes cell cycle exit and senescence after irradiation.", "I hypothesise that increased p21 stability due to reduced C41 promotes proliferation in G2 phase.", "I hypothesise that S-sulfenylation of cell cycle regulators coordinates redox control with cell cycle progression."]	Q1: I hypothesise that p21 C41 oxidation promotes cell cycle exit and senescence after irradiation. Q2: I hypothesise that increased p21 stability due to reduced C41 promotes proliferation in G2 phase. Q3: I hypothesise that S-sulfenylation of cell cycle regulators coordinates redox control with cell cycle progression.	I hypothesise that p21 C41 oxidation promotes cell cycle exit and senescence after irradiation.	I hypothesise that increased p21 stability due to reduced C41 promotes proliferation in G2 phase.	I hypothesise that S-sulfenylation of cell cycle regulators coordinates redox control with cell cycle progression.
10.1101/2024.11.15.623304	Oncogene-induced senescence and senescence-associated secretory phenotype (SASP) determine the efficacy of palbociclib in PIK3CA mutated colorectal cancer	Cao, P.; Zhou, X.; Yang, S.; Shen, T.; Wang, S.; Yu, H.; Liu, X.; Gong, Y.; Wang, W.; Wang, H.; Zhou, T.; Wang, J.; Fan, Z.; Huang, M.; Qian, X.; Wang, X.; Wang, Q.; Yang, L.; Zhang, Y.; Lin, F.	cancer biology	2025-02-02	2	https://www.biorxiv.org/content/10.1101/2024.11.15.623304v2	Palbociclib is an excellent CDK4/6 inhibitor, but its clinical application is mainly limited to the treatment of advanced ER+/HR+ and HER2- breast cancer. Its efficacy in colorectal cancer (CRC) is evaluated in multiple trials and so far remains undetermined. We found that the PIK3CA-mutant CRC cells were insensitive to palbociclib treatment compared with the PIK3CA wild-type counterparts, and th…	[]	Q1: I hypothesise that PIK3CA-mutant colorectal cancer cells exhibit increased oncogene-induced senescence compared to PIK3CA wild-type cells. Q2: I hypothesise that palbociclib treatment induces a senescence-associated secretory phenotype in PIK3CA-mutant colorectal cancer cells. Q3: I hypothesise that erlotinib synergizes with palbociclib to overcome resistance in PIK3CA-mutant colorectal cance…	I hypothesise that PIK3CA-mutant colorectal cancer cells exhibit increased oncogene-induced senescence compared to PIK3CA wild-type cells.	I hypothesise that palbociclib treatment induces a senescence-associated secretory phenotype in PIK3CA-mutant colorectal cancer cells.	I hypothesise that erlotinib synergizes with palbociclib to overcome resistance in PIK3CA-mutant colorectal cancer by reducing SASP factors.
10.1101/2024.11.14.623694	Tissue-specific responses to TFAM and mtDNA copy number manipulation in prematurely ageing mice	Kremer, L. S.; Gao, G.; Rigoni, G.; Filograna, R.; Mennuni, M.; Wibom, R.; Vegvari, A.; Koolmeister, C.; Larsson, N.-G.	genetics	25/02/2025	2	https://www.biorxiv.org/content/10.1101/2024.11.14.623694v2	Somatic mitochondrial DNA (mtDNA) mutations are heavily implicated as important drivers of ageing and age-related diseases. Their pathological effect can be partially counteracted by increasing the absolute amount of wild-type mtDNA via moderately upregulating TFAM, a protein important for mtDNA packaging and expression. However, strong TFAM overexpression can also have detrimental effects as it …	[]	Q1: I hypothesise that moderate TFAM overexpression improves brown adipocyte tissue homeostasis in mtDNA mutator mice. Q2: I hypothesise that moderate TFAM reduction impairs brown adipocyte tissue homeostasis in mtDNA mutator mice. Q3: I hypothesise that TFAM is the sole determinant of mtDNA copy number in compromised OXPHOS conditions.	I hypothesise that moderate TFAM overexpression improves brown adipocyte tissue homeostasis in mtDNA mutator mice.	I hypothesise that moderate TFAM reduction impairs brown adipocyte tissue homeostasis in mtDNA mutator mice.	I hypothesise that TFAM is the sole determinant of mtDNA copy number in compromised OXPHOS conditions.
10.1101/2024.11.14.623513	Telomeric Repeat-Containing RNA Increases in Aged Human Cells	Chu, H.-P. C.; Hsieh, Y.-H.; Tai, C.-H.; Yeh, M.-T.; Yang, P.-C.; Chen, Y.-C.; Yen, C.-P.; Han, D.-S.; Shen, H.-J.; Yeh, C.-H.	genomics	2025-11-06	2	https://www.biorxiv.org/content/10.1101/2024.11.14.623513v2	Telomeric repeat-containing RNA (TERRA), transcribed from subtelomeric regions towards telomeric ends, poses challenges in deciphering its complete sequences. Utilizing TERRA-capture RNA-seq and Oxford Nanopore direct RNA sequencing to acquire full-length TERRA, we annotate TERRA transcription regions in the human T2T-CHM13 reference genome. TERRA transcripts encompass hundreds to over a thousand…	[]	Q1: I hypothesise that increased TERRA levels in aged human cells contribute to cellular senescence. Q2: I hypothesise that TERRA upregulation in aged human brain cells exacerbates Alzheimer's disease pathology. Q3: I hypothesise that reducing TERRA expression will extend the replicative lifespan of human fibroblasts.	I hypothesise that increased TERRA levels in aged human cells contribute to cellular senescence.	I hypothesise that TERRA upregulation in aged human brain cells exacerbates Alzheimer's disease pathology.	I hypothesise that reducing TERRA expression will extend the replicative lifespan of human fibroblasts.
10.1101/2024.11.07.622548	Pathological tau alters head direction signaling and induces spatial disorientation	Jiang, S.; Hijazi, S.; Sarkany, B.; Gautsch, V. G.; Lachance, P. A.; Hasselmo, M. E.; Bannerman, D.; Viney, T. J.	neuroscience	25/02/2025	2	https://www.biorxiv.org/content/10.1101/2024.11.07.622548v2	Spatial disorientation, an early symptom of dementia, is emerging as an early and reliable cognitive biomarker predicting future memory problems associated with Alzheimers disease, but the underlying neural mechanisms have yet to be fully defined. The anterodorsal thalamic nucleus (ADn) exhibits early and selective vulnerability to pathological misfolded forms of tau, a major hallmark of Alzheime…	["I hypothesise that pathological tau in the anterodorsal thalamic nucleus reduces head direction cell firing rate.", "I hypothesise that pathological tau in the anterodorsal thalamic nucleus decreases head direction cell burst firing.", "I hypothesise that pathological tau in the anterodorsal thalamic nucleus impairs spatial memory recall in mice."]	Q1: I hypothesise that pathological tau in the anterodorsal thalamic nucleus reduces head direction cell firing rate. Q2: I hypothesise that pathological tau in the anterodorsal thalamic nucleus decreases head direction cell burst firing. Q3: I hypothesise that pathological tau in the anterodorsal thalamic nucleus impairs spatial memory recall in mice.	I hypothesise that pathological tau in the anterodorsal thalamic nucleus reduces head direction cell firing rate.	I hypothesise that pathological tau in the anterodorsal thalamic nucleus decreases head direction cell burst firing.	I hypothesise that pathological tau in the anterodorsal thalamic nucleus impairs spatial memory recall in mice.
10.1101/2024.10.31.621394	Dissociation of the nuclear basket triggers chromosome loss in aging yeast	Mirkovic, M.; McCarthy, J.; Meinema, A. C.; Partenau, J.; Lee, S. S.; Elela, S. A.; Barral, Y.	cell biology	25/07/2025	2	https://www.biorxiv.org/content/10.1101/2024.10.31.621394v2	In many organisms, aging is a clear risk factor for chromosome mis-segregation, the main source of aneuploidy. Here, we report that old yeast cells lose chromosomes by partitioning them asymmetrically to their daughter cells together with the pre-existing (old) spindle pole body (SPB, centrosome equivalent in yeast). Strikingly, remodelling of the nuclear pore complex (NPC) and the displacement o…	["I hypothesise that nuclear basket displacement from NPCs directly causes chromosome loss in aging yeast.", "I hypothesise that pre-mRNA leakage into the cytoplasm triggers chromosome loss in aging yeast.", "I hypothesise that removing introns from genes involved in chromosome segregation prevents chromosome loss in aging yeast."]	Q1: I hypothesise that nuclear basket displacement from NPCs directly causes chromosome loss in aging yeast. Q2: I hypothesise that pre-mRNA leakage into the cytoplasm triggers chromosome loss in aging yeast. Q3: I hypothesise that removing introns from genes involved in chromosome segregation prevents chromosome loss in aging yeast.	I hypothesise that nuclear basket displacement from NPCs directly causes chromosome loss in aging yeast.	I hypothesise that pre-mRNA leakage into the cytoplasm triggers chromosome loss in aging yeast.	I hypothesise that removing introns from genes involved in chromosome segregation prevents chromosome loss in aging yeast.
10.1101/2024.10.30.621201	Deficiency of mitophagy mediator Parkin in aortic smooth muscle cells exacerbates abdominal aortic aneurysm	Wang, H.; Kazaleh, M.; Gioscia-Ryan, R. A.; Millar, J.; Temprano-Sagrera, G.; Wood, S.; Van Den Burgh, F.; Blin, M. G.; Wragg, K. M.; Luna, A.; Hawkins, R. B.; Soleimanpour, S. A.; Sabater-Lleal, M.; Shu, C.; Beard, D. A.; Ailawadi, G.; Deng, J. C.; Goldstein, D. R.; Salmon, M.	molecular biology	25/03/2025	2	https://www.biorxiv.org/content/10.1101/2024.10.30.621201v2	Abdominal aortic aneurysms (AAAs) are a degenerative aortic disease and associated with hallmarks of aging, such as mitophagy. Despite this, the exact associations among mitophagy, aging, and AAA progression remain unknown. In our study, gene expression analysis of human AAA tissue revealed downregulation of mitophagy pathways, mitochondrial structure, and function-related proteins. Human proteom…	["I hypothesise that Parkin deficiency in aortic smooth muscle cells directly causes abdominal aortic aneurysm dilation.", "I hypothesise that restoring mitophagy in aged aortic smooth muscle cells prevents abdominal aortic aneurysm formation.", "I hypothesise that inhibiting USP30 in aged mice reduces abdominal aortic aneurysm incidence and growth."]	Q1: I hypothesise that Parkin deficiency in aortic smooth muscle cells directly causes abdominal aortic aneurysm dilation. Q2: I hypothesise that restoring mitophagy in aged aortic smooth muscle cells prevents abdominal aortic aneurysm formation. Q3: I hypothesise that inhibiting USP30 in aged mice reduces abdominal aortic aneurysm incidence and growth.	I hypothesise that Parkin deficiency in aortic smooth muscle cells directly causes abdominal aortic aneurysm dilation.	I hypothesise that restoring mitophagy in aged aortic smooth muscle cells prevents abdominal aortic aneurysm formation.	I hypothesise that inhibiting USP30 in aged mice reduces abdominal aortic aneurysm incidence and growth.
10.1101/2024.10.27.620431	The EGFR ligand amphiregulin regulates genomic integrity by facilitating heterochromatin formation in response to replication stress	Jiang, T.; Zein, A.; Pratt, C. M. A.	cancer biology	16/06/2025	2	https://www.biorxiv.org/content/10.1101/2024.10.27.620431v2	The EGFR ligand, amphiregulin (AREG) is a key mammary ductal cell differentiation and growth factor. AREG has also been detected in the nucleus of some epithelial cancers although the physiological stimulus and nuclear role are not known. Using immortalized mammary epithelial cells (MECs), we have discovered that AREG undergoes retrograde trafficking to the nuclear membrane (nAREG) in close proxi…	["I hypothesise that amphiregulin nuclear localization is required for heterochromatin maintenance in response to replication stress.", "I hypothesise that amphiregulin depletion exacerbates DNA damage and promotes senescence in BRCA2mut/+ mammary epithelial cells.", "I hypothesise that amphiregulin facilitates H3K9me3 deposition at heterochromatin during replication stress."]	Q1: I hypothesise that amphiregulin nuclear localization is required for heterochromatin maintenance in response to replication stress. Q2: I hypothesise that amphiregulin depletion exacerbates DNA damage and promotes senescence in BRCA2mut/+ mammary epithelial cells. Q3: I hypothesise that amphiregulin facilitates H3K9me3 deposition at heterochromatin during replication stress.	I hypothesise that amphiregulin nuclear localization is required for heterochromatin maintenance in response to replication stress.	I hypothesise that amphiregulin depletion exacerbates DNA damage and promotes senescence in BRCA2mut/+ mammary epithelial cells.	I hypothesise that amphiregulin facilitates H3K9me3 deposition at heterochromatin during replication stress.
10.1101/2024.10.22.619524	Loss of Tonoplast Sucrose Transporter SUT4 Alters Seasonal Growth, Carbohydrate Allocation, and Fertility in Field-Grown Poplar	Tuma, T. T.; McInnes, H. A.; Pham, H.; Bewg, W. P.; Deguchi, M.; Zhou, R.; Surber, S. M.; Lipzen, A.; Barry, K. W.; Lieb, B.; Weber Wyneken, D. L.; Harman-Ware, A. E.; Dahlen, J.; Harding, S.; Tsai, C.-J.	plant biology	2025-05-08	2	https://www.biorxiv.org/content/10.1101/2024.10.22.619524v2	Climate uncertainty is intensifying the need for greater plasticity in carbohydrate reserve utilization to support winter survival and spring growth in woody perennials. In poplar, the single-copy SUT4, which encodes a tonoplast-localized sucrose transporter, and the SUT5/SUT6 genome duplicates, which encode plasma membrane-localized transporters, are expressed year-round, with SUT4 showing highe…	["I hypothesise that SUT4 loss-of-function in poplar leads to premature autumn leaf senescence due to impaired vacuolar sucrose efflux.", "I hypothesise that SUT4 knockout in poplar reduces winter survival by disrupting carbohydrate reserves in xylem and bark.", "I hypothesise that SUT4 deficiency in poplar causes sterile ovules by altering sucrose and raffinose metabolism in developing catkins."]	Q1: I hypothesise that SUT4 loss-of-function in poplar leads to premature autumn leaf senescence due to impaired vacuolar sucrose efflux. Q2: I hypothesise that SUT4 knockout in poplar reduces winter survival by disrupting carbohydrate reserves in xylem and bark. Q3: I hypothesise that SUT4 deficiency in poplar causes sterile ovules by altering sucrose and raffinose metabolism in developing catki…	I hypothesise that SUT4 loss-of-function in poplar leads to premature autumn leaf senescence due to impaired vacuolar sucrose efflux.	I hypothesise that SUT4 knockout in poplar reduces winter survival by disrupting carbohydrate reserves in xylem and bark.	I hypothesise that SUT4 deficiency in poplar causes sterile ovules by altering sucrose and raffinose metabolism in developing catkins.
10.1101/2024.12.20.629759	The brain cortical similarity network: Development and sensitivity to early life stress in a rat model	Smith, R. L.; Sawiak, S. J.; Dorfschmidt, L.; Dutcher, E. G.; Jones, J. A.; Hahn, J. D.; Sporns, O.; Swanson, L. W.; Taylor, P. A.; Glen, D. R.; Dalley, J. W.; McMahon, F. J.; Raznahan, A.; Vertes, P. E.; Bullmore, E. T.	neuroscience	29/08/2025	2	https://www.biorxiv.org/content/10.1101/2024.12.20.629759v2	Understanding how early life experiences shape brain network development is a key challenge in the neuroscience of mental health disorders. To address this, we used magnetic resonance imaging (MRI) similarity network analysis to study the effects of stress in the rat, an important animal model in neuropsychiatry. We measured magnetization transfer ratio (MTR) at each of 53 distinct cortical areas…	["I hypothesise early life stress reverses normative fronto-hippocampal similarity convergence during development.", "I hypothesise early life stress alters mid-adulthood fronto-hippocampal divergence in cortical similarity networks.", "I hypothesise reduced inter-areal similarity in frontal and parahippocampal regions predicts later life stress effects."]	Q1: I hypothesise early life stress reverses normative fronto-hippocampal similarity convergence during development. Q2: I hypothesise early life stress alters mid-adulthood fronto-hippocampal divergence in cortical similarity networks. Q3: I hypothesise reduced inter-areal similarity in frontal and parahippocampal regions predicts later life stress effects.	I hypothesise early life stress reverses normative fronto-hippocampal similarity convergence during development.	I hypothesise early life stress alters mid-adulthood fronto-hippocampal divergence in cortical similarity networks.	I hypothesise reduced inter-areal similarity in frontal and parahippocampal regions predicts later life stress effects.
10.1101/2024.12.18.629088	Constructing the first comorbidity networks in companion dogs in the Dog Aging Project	Fang, A.; Kumar, L.; Creevy, K. E.; Dog Aging Project Consortium, ; Promislow, D. E. L.; Ma, J.	physiology	2025-11-07	2	https://www.biorxiv.org/content/10.1101/2024.12.18.629088v2	Comorbidity and its association with age are of great interest in geroscience. However, there are few model organisms that are well-suited to study comorbidities that will have high relevance to humans. In this light, we turn our attention to the companion dog. The companion dog shares many morbidities with humans. Thus, a better understanding of canine comorbidity relationships could benefit bot…	["I hypothesise that older dogs exhibit a higher number of co-occurring morbidities than younger dogs.", "I hypothesise that hypertension is a precursor to chronic kidney disease in companion dogs.", "I hypothesise that diabetes is a precursor to cataracts in companion dogs."]	Q1: I hypothesise that older dogs exhibit a higher number of co-occurring morbidities than younger dogs. Q2: I hypothesise that hypertension is a precursor to chronic kidney disease in companion dogs. Q3: I hypothesise that diabetes is a precursor to cataracts in companion dogs.	I hypothesise that older dogs exhibit a higher number of co-occurring morbidities than younger dogs.	I hypothesise that hypertension is a precursor to chronic kidney disease in companion dogs.	I hypothesise that diabetes is a precursor to cataracts in companion dogs.
10.1101/2024.12.13.627515	Characterization of DNA methylation in PBMCs and donor-matched iPSCs shows methylation is reset during stem cell reprogramming	Reed, X.; Weller, C. A.; Saez-Atienzar, S.; Beilina, A.; Solaiman, S.; Portley, M.; Kaileh, M.; Roy, R.; Ding, J.; Moore, A. Z.; Whitaker, D. T.; Traynor, B. J.; Gibbs, J. R.; Scholz, S. W.; Cookson, M. R.	molecular biology	17/04/2025	2	https://www.biorxiv.org/content/10.1101/2024.12.13.627515v2	O_FIG O_LINKSMALLFIG WIDTH=200 HEIGHT=138 SRC="FIGDIR/small/627515v2_ufig1.gif" ALT="Figure 1"> View larger version (21K): org.highwire.dtl.DTLVardef@18cda69org.highwire.dtl.DTLVardef@574c4corg.highwire.dtl.DTLVardef@1522644org.highwire.dtl.DTLVardef@4e799c_HPS_FORMAT_FIGEXP M_FIG O_FLOATNOGraphical AbstractC_FLOATNO C_FIG HighlightsO_LIGeneration of a population-level set of iPSC lines from heal…	["I hypothesise that reprogramming PBMCs to iPSCs resets age-related DNA methylation patterns.", "I hypothesise that telomere length in PBMCs is reset to an earlier state in donor-matched iPSCs.", "I hypothesise that methQTLs in iPSCs reflect different biological functions compared to PBMCs."]	Q1: I hypothesise that reprogramming PBMCs to iPSCs resets age-related DNA methylation patterns. Q2: I hypothesise that telomere length in PBMCs is reset to an earlier state in donor-matched iPSCs. Q3: I hypothesise that methQTLs in iPSCs reflect different biological functions compared to PBMCs.	I hypothesise that reprogramming PBMCs to iPSCs resets age-related DNA methylation patterns.	I hypothesise that telomere length in PBMCs is reset to an earlier state in donor-matched iPSCs.	I hypothesise that methQTLs in iPSCs reflect different biological functions compared to PBMCs.
10.1101/2024.12.11.627965	Food-Derived Compounds Extend the Shelf-Life of Frozen Human Milk	Silpe, J. E.; Damian-Medina, K.; Bassler, B. L.	molecular biology	2025-12-01	2	https://www.biorxiv.org/content/10.1101/2024.12.11.627965v2	Breastmilk is known to provide optimal nutrition for infant growth and development. A cross-sectional analysis of nationally representative US data from 2016 to 2021 revealed that >90% of lactating mothers reported using breast pumps to express milk.1 We conducted a survey of n = 1,049 lactating or recently lactating individuals from a US nationally representative population to explore breastmilk…	[]	Q1: I hypothesise that adding specific food-derived compounds to frozen human milk will prevent fat degradation. Q2: I hypothesise that these compounds will preserve the antioxidant capacity of frozen human milk. Q3: I hypothesise that these compounds will reduce rancid free fatty acid production in frozen human milk.	I hypothesise that adding specific food-derived compounds to frozen human milk will prevent fat degradation.	I hypothesise that these compounds will preserve the antioxidant capacity of frozen human milk.	I hypothesise that these compounds will reduce rancid free fatty acid production in frozen human milk.
10.1101/2024.12.10.627727	Age-Related Patterns of DNA Methylation Changes	Chen, K. Y.; Wang, W.; Suryadevara, H. N. S. K.; Peng, G.	molecular biology	2025-12-06	2	https://www.biorxiv.org/content/10.1101/2024.12.10.627727v2	Epigenetic clocks have achieved significant success in aging research, but they often assume linear methylation changes with age and lack biological interpretability. Using data from 4,641 samples across 23 GEO datasets, we analyzed 1,557 CpGs from nine widely used clocks with minimal overlap, and identified consistent age-associated methylation patterns. We then identified 19,432 age-associated …	[]	Q1: I hypothesise that non-linear methylation trajectories identified after age 65 are associated with accelerated cellular senescence. Q2: I hypothesise that faster methylation changes in males are linked to a higher incidence of age-related diseases. Q3: I hypothesise that incorporating identified age-associated CpGs improves epigenetic clock accuracy for individuals over 65.	I hypothesise that non-linear methylation trajectories identified after age 65 are associated with accelerated cellular senescence.	I hypothesise that faster methylation changes in males are linked to a higher incidence of age-related diseases.	I hypothesise that incorporating identified age-associated CpGs improves epigenetic clock accuracy for individuals over 65.
10.1101/2024.12.03.626661	Comparing Intra- and Inter-individual Correlational Brain Connectivity from Functional and Structural Neuroimaging Data	Di, X.; Biswal, B. B.; Alzheimer's Disease Neuroimaging Initiative,	neuroscience	28/02/2025	2	https://www.biorxiv.org/content/10.1101/2024.12.03.626661v2	Inferring brain connectivity from inter-individual correlations has been applied across various neuroimaging modalities, including positron emission tomography (PET) and MRI. The variability underlying these inter-individual correlations is generally attributed to factors such as genetics, life experiences, and long-term influences like aging. This study leveraged two unique longitudinal datasets…	["I hypothesise that aging primarily drives intra-individual gray matter volume correlations in the brain.", "I hypothesise that state-like variability, not aging, primarily drives intra-individual regional homogeneity correlations.", "I hypothesise that functional neuroimaging measures (ReHo, FDG-PET) more closely reflect resting-state functional connectivity than structural measures."]	Q1: I hypothesise that aging primarily drives intra-individual gray matter volume correlations in the brain. Q2: I hypothesise that state-like variability, not aging, primarily drives intra-individual regional homogeneity correlations. Q3: I hypothesise that functional neuroimaging measures (ReHo, FDG-PET) more closely reflect resting-state functional connectivity than structural measures.	I hypothesise that aging primarily drives intra-individual gray matter volume correlations in the brain.	I hypothesise that state-like variability, not aging, primarily drives intra-individual regional homogeneity correlations.	I hypothesise that functional neuroimaging measures (ReHo, FDG-PET) more closely reflect resting-state functional connectivity than structural measures.
10.1101/2024.12.03.626516	Tabula Sapiens reveals transcription factor expression, senescence effects, and sex-specific features in cell types from 28 human organs and tissues	The Tabula Sapiens Consortium, ; Quake, S. R.	cell biology	27/08/2025	2	https://www.biorxiv.org/content/10.1101/2024.12.03.626516v2	The Tabula Sapiens is a reference human cell atlas containing single cell transcriptomic data from more than two dozen organs and tissues. Here we report Tabula Sapiens 2.0 which includes data from nine new donors, doubles the number of cells in Tabula Sapiens, and adds four new tissues. This new data includes four donors with multiple organs contributed, thus providing a unique data set in which…	["I hypothesise that senescent cells in the liver exhibit distinct transcription factor expression profiles compared to senescent cells in the lungs.", "I hypothesise that specific transcription factors are universally upregulated in senescent cells across all analyzed human organs.", "I hypothesise that sex-specific gene expression differences in immune cells are more pronounced than in epitheli…	Q1: I hypothesise that senescent cells in the liver exhibit distinct transcription factor expression profiles compared to senescent cells in the lungs. Q2: I hypothesise that specific transcription factors are universally upregulated in senescent cells across all analyzed human organs. Q3: I hypothesise that sex-specific gene expression differences in immune cells are more pronounced than in epit…	I hypothesise that senescent cells in the liver exhibit distinct transcription factor expression profiles compared to senescent cells in the lungs.	I hypothesise that specific transcription factors are universally upregulated in senescent cells across all analyzed human organs.	I hypothesise that sex-specific gene expression differences in immune cells are more pronounced than in epithelial cells.
10.1101/2024.12.02.625632	Mapping the canine microbiome: Insights from the Dog Aging Project	Bamberger, T.; Muller, E.; Algavi, Y. M.; Greenier, A.; Adjangba, C.; Slikas, E.; Brassington, L.; Mariner, B.; McCoy, B.; Harrison, B. R.; Partida-Aguilar, M.; Marye, A.; Harris, A.; Rout, E.; DAP Consortium, ; Avery, A.; Promislow, D. E. L.; Snyder-Mackler, N.; Borenstein, E.	microbiology	2025-12-04	2	https://www.biorxiv.org/content/10.1101/2024.12.02.625632v2	Companion dogs (Canis lupus familiaris) offer a unique model for studying the gut microbiome and its relation to aging due to their cohabitation with humans, sharing similar environments, diets, and healthcare practices. Here, we present the Dog Aging Project (DAP) Precision cohort, the largest population-wide study of the canine gut microbiome to date. This cohort encompasses over 900 dogs of di…	["I hypothesise that specific gut microbial taxa abundance in dogs correlates with their biological age as measured by the DAP microbiome clock.", "I hypothesise that dietary changes in dogs will significantly alter their gut microbiome composition and its association with aging markers.", "I hypothesise that dogs with specific health conditions will exhibit distinct gut microbiome profiles compa…	Q1: I hypothesise that specific gut microbial taxa abundance in dogs correlates with their biological age as measured by the DAP microbiome clock. Q2: I hypothesise that dietary changes in dogs will significantly alter their gut microbiome composition and its association with aging markers. Q3: I hypothesise that dogs with specific health conditions will exhibit distinct gut microbiome profiles c…	I hypothesise that specific gut microbial taxa abundance in dogs correlates with their biological age as measured by the DAP microbiome clock.	I hypothesise that dietary changes in dogs will significantly alter their gut microbiome composition and its association with aging markers.	I hypothesise that dogs with specific health conditions will exhibit distinct gut microbiome profiles compared to healthy dogs of similar age.
10.1101/2024.11.27.625794	Sex differences in the rates and association of cerebral blood flow and glucose metabolism in normative ageing.	Deery, H.; Moran, C.; Liang, E. X.; Gurvich, C.; Egan, G. F.; Jamadar, S. D.	neuroscience	13/05/2025	2	https://www.biorxiv.org/content/10.1101/2024.11.27.625794v2	It is well established that there is a local increase in cerebral blood flow and glucose metabolism in response to neuronal events. However, there is a paucity of sex disaggregated studies measuring the relationship between cerebral blood flow and glucose metabolism, despite metabolic and vascular factors being considered primary drivers of age-related cognitive decline and dementias like Alzheim…	["I hypothesise that older females exhibit a stronger negative correlation between cerebral blood flow and glucose metabolism than older males.", "I hypothesise that a reduced correlation strength between cerebral blood flow and glucose metabolism is associated with poorer cognitive performance in older adults.", "I hypothesise that sex moderates the age-related decline in the association between…	Q1: I hypothesise that older females exhibit a stronger negative correlation between cerebral blood flow and glucose metabolism than older males. Q2: I hypothesise that a reduced correlation strength between cerebral blood flow and glucose metabolism is associated with poorer cognitive performance in older adults. Q3: I hypothesise that sex moderates the age-related decline in the association bet…	I hypothesise that older females exhibit a stronger negative correlation between cerebral blood flow and glucose metabolism than older males.	I hypothesise that a reduced correlation strength between cerebral blood flow and glucose metabolism is associated with poorer cognitive performance in older adults.	I hypothesise that sex moderates the age-related decline in the association between cerebral blood flow and glucose metabolism.
10.1101/2024.11.27.625711	Enalapril mitigates senescence and aging-related phenotypes by targeting antioxidative genes via phosphorylated Smad1/5/9	Lyu, W.; Wang, H.; Du, Z.; Wei, R.; He, J.; Meng, F.; Bi, J.; Zhang, L.; Zhang, C.; Guan, Y.; Tao, W.	cell biology	29/05/2025	2	https://www.biorxiv.org/content/10.1101/2024.11.27.625711v2	Aging increases the risk of a myriad of chronic diseases, which are expensive and difficult to treat owing to their various risk factors. Repurposing existing medications has accelerated the development of therapies aimed at slowing aging. In this study, we revealed that enalapril, a drug widely prescribed for hypertension, can improve both cellular senescence and individual health. Mechanistical…	["I hypothesise enalapril treatment reduces senescence markers in aged cells by increasing antioxidative gene expression.", "I hypothesise enalapril treatment improves memory capacity in aged organisms by reducing reactive oxygen species.", "I hypothesise phosphorylated Smad1/5/9 mediates enalapril's anti-senescence effects by regulating cell cycle genes."]	Q1: I hypothesise enalapril treatment reduces senescence markers in aged cells by increasing antioxidative gene expression. Q2: I hypothesise enalapril treatment improves memory capacity in aged organisms by reducing reactive oxygen species. Q3: I hypothesise phosphorylated Smad1/5/9 mediates enalapril's anti-senescence effects by regulating cell cycle genes.	I hypothesise enalapril treatment reduces senescence markers in aged cells by increasing antioxidative gene expression.	I hypothesise enalapril treatment improves memory capacity in aged organisms by reducing reactive oxygen species.	I hypothesise phosphorylated Smad1/5/9 mediates enalapril's anti-senescence effects by regulating cell cycle genes.
10.1101/2024.11.22.624885	Alterations in Circulating T-Cell Subsets with Gut-Homing/Residency Phenotypes Predict HIV-1 Status and Subclinical Atherosclerosis	Moreira Gabriel, E.; Dias, J.; Filali-Mouhim, A.; Caballero, R. E.; Wiche salinas, T. R.; Nayrac, M.; Chartrand-Lefebvre, C.; Routy, J.-P.; Durand, M.; El-Far, M.; Tremblay, C. L.; Ancuta, P.	immunology	15/08/2025	2	https://www.biorxiv.org/content/10.1101/2024.11.22.624885v2	Antiretroviral therapy (ART) controls HIV-1 replication in people with HIV-1 (PWH), but immunological restauration is not achieved at mucosal barriers. Intestinal integrity impairment fuels microbial translocation and chronic immune activation, thus heightening the cardiovascular disease (CVD) risk. Here, we sought to identify novel immunological predictors of the HIV and CVD status in the periph…	["I hypothesise that increased frequency of CD326+CD69+CCR6+ItgE+ CD4+ T-cells predicts higher coronary atherosclerotic plaque volume.", "I hypothesise that decreased frequency of CD3+CD4-TCRÃƒÅ½Ã‚Â²+TCRÃƒÅ½Ã‚Â³ÃƒÅ½Ã‚Â´-CD8+CD8ÃƒÅ½Ã‚Â²- T-cells predicts higher coronary atherosclerotic plaque volume.", "I hypothesise that increased frequency of CCR6+CD4+ T-cells predicts higher coronary atheroscle…	Q1: I hypothesise that increased frequency of CD326+CD69+CCR6+ItgE+ CD4+ T-cells predicts higher coronary atherosclerotic plaque volume. Q2: I hypothesise that decreased frequency of CD3+CD4-TCRÃƒÅ½Ã‚Â²+TCRÃƒÅ½Ã‚Â³ÃƒÅ½Ã‚Â´-CD8+CD8ÃƒÅ½Ã‚Â²- T-cells predicts higher coronary atherosclerotic plaque volume. Q3: I hypothesise that increased frequency of CCR6+CD4+ T-cells predicts higher coronary athero…	I hypothesise that increased frequency of CD326+CD69+CCR6+ItgE+ CD4+ T-cells predicts higher coronary atherosclerotic plaque volume.	I hypothesise that decreased frequency of CD3+CD4-TCRÃƒÅ½Ã‚Â²+TCRÃƒÅ½Ã‚Â³ÃƒÅ½Ã‚Â´-CD8+CD8ÃƒÅ½Ã‚Â²- T-cells predicts higher coronary atherosclerotic plaque volume.	I hypothesise that increased frequency of CCR6+CD4+ T-cells predicts higher coronary atherosclerotic plaque volume.
10.1101/2024.12.27.630526	Impaired axon regeneration and heightened synaptic dynamics in the injured aged mammalian cortex	Bass, C.; Bharath, A. A.; De Paola, V.	neuroscience	2025-04-03	2	https://www.biorxiv.org/content/10.1101/2024.12.27.630526v2	How aging affects axon regeneration and synaptic repair in the brain is poorly understood. To study age-related changes in neural circuits, we developed a model of axonal injury in the aged (> 2 years) mouse somatosensory cortex. By directly tracking fluorescently labelled injured axons by multiphoton imaging, we find that while axon degeneration in the aged brain is comparable to the young adult…	["I hypothesise that aged mice exhibit significantly reduced axon regrowth after injury compared to young adult mice.", "I hypothesise that increased synaptic bouton number and size post-injury in aged mice contributes to functional recovery.", "I hypothesise that inhibiting synaptic re-wiring in aged mice will worsen functional recovery after axon injury."]	Q1: I hypothesise that aged mice exhibit significantly reduced axon regrowth after injury compared to young adult mice. Q2: I hypothesise that increased synaptic bouton number and size post-injury in aged mice contributes to functional recovery. Q3: I hypothesise that inhibiting synaptic re-wiring in aged mice will worsen functional recovery after axon injury.	I hypothesise that aged mice exhibit significantly reduced axon regrowth after injury compared to young adult mice.	I hypothesise that increased synaptic bouton number and size post-injury in aged mice contributes to functional recovery.	I hypothesise that inhibiting synaptic re-wiring in aged mice will worsen functional recovery after axon injury.
10.1101/2024.12.27.630538	The Arp2/3 complex maintains genome integrity and survival of epidermal Langerhans cells	Delgado, M.-G.; Burkhart, A.-K.; Villar, J.; Amadio, R.; Racz, V. S.; Sanseau, D.; De Silva, N.; Lacerda Mariano, L.; Bracchetti, G.; Shmakova, A.; Chipont, A.; San Roman, M.; Calmettes, V.; Alraies, Z.; Maurin, M.; Dauphin, A.; Guerin, C.; Ginhaux, F.; Manel, N.; Fachinetti, D.; Benvenuti, F.; Iden, S.; Lennon-Dumenil, A.-M.	cell biology	2025-11-03	2	https://www.biorxiv.org/content/10.1101/2024.12.27.630538v2	Myeloid cells use intracellular actin networks for key cellular processes, including cell migration and chemotaxis, phagocytosis or macropinocytosis, as well as immune synapse formation. However, whether these networks play any role in the development and/or survival of myeloid cells in tissues remains open. Here, we found that the Arp2/3 complex, which is responsible for the nucleation of branch…	["I hypothesise Arp2/3 complex deficiency accelerates epidermal Langerhans cell aging by increasing DNA damage.", "I hypothesise Arp2/3 complex loss leads to nuclear envelope rupture in epidermal Langerhans cells.", "I hypothesise Arp2/3 complex is essential for epidermal Langerhans cell survival throughout life."]	Q1: I hypothesise Arp2/3 complex deficiency accelerates epidermal Langerhans cell aging by increasing DNA damage. Q2: I hypothesise Arp2/3 complex loss leads to nuclear envelope rupture in epidermal Langerhans cells. Q3: I hypothesise Arp2/3 complex is essential for epidermal Langerhans cell survival throughout life.	I hypothesise Arp2/3 complex deficiency accelerates epidermal Langerhans cell aging by increasing DNA damage.	I hypothesise Arp2/3 complex loss leads to nuclear envelope rupture in epidermal Langerhans cells.	I hypothesise Arp2/3 complex is essential for epidermal Langerhans cell survival throughout life.
10.1101/2024.12.21.629509	The biophysical mechanism of mitochondrial pearling	Sturm, G.; Hake, K.; Lefebvre, A. E. Y. T.; Rux, C. J.; Ivanova, D.; Millett-Sikking, A.; Tharp, K. M.; Rao, B.; Closser, M.; Waite, A. J.; Precido-Lopez, M.; Ritter, A. T.; Dumont, S.; Lu, W.; Manley, S.; Landoni, J. C.; Marshall, W. F.	cell biology	27/04/2025	2	https://www.biorxiv.org/content/10.1101/2024.12.21.629509v2	Mitochondrial networks exhibit remarkable dynamics that are driven in part by fission and fusion events. However, there are other reorganizations of the network that do not involve fission and fusion. One such exception is the elusive, "beads-on-a-string" morphological transition of mitochondria. During such transitions, the cylindrical tubes of the mitochondrial membrane transiently undergo shap…	["I hypothesise that increased internal pressure from ionic flux drives mitochondrial pearling in senescent T-cells.", "I hypothesise that external cytoskeletal tension induces mitochondrial pearling during neuronal firing.", "I hypothesise that MICOS complex activity directly regulates the frequency of mitochondrial pearling events."]	Q1: I hypothesise that increased internal pressure from ionic flux drives mitochondrial pearling in senescent T-cells. Q2: I hypothesise that external cytoskeletal tension induces mitochondrial pearling during neuronal firing. Q3: I hypothesise that MICOS complex activity directly regulates the frequency of mitochondrial pearling events.	I hypothesise that increased internal pressure from ionic flux drives mitochondrial pearling in senescent T-cells.	I hypothesise that external cytoskeletal tension induces mitochondrial pearling during neuronal firing.	I hypothesise that MICOS complex activity directly regulates the frequency of mitochondrial pearling events.
10.1101/2024.12.21.629084	Age-related Increase in Locus Coeruleus Activity and Connectivity with Prefrontal Cortex during Ambiguity Processing	Dave, A.; Ye, S.; Batz, L. R.; Lan, X.; Jacobs, H.; Ziaei, M.	neuroscience	31/05/2025	2	https://www.biorxiv.org/content/10.1101/2024.12.21.629084v2	Interpreting ambiguous environmental cues, like facial expressions, becomes increasingly challenging with age, especially as cognitive resources decline. Managing these challenges requires adaptive neural mechanisms that are essential for maintaining mental well-being. The locus coeruleus (LC), the brains main norepinephrine source, regulates attention, arousal, and stress response. With extensiv…	["I hypothesise that reduced locus coeruleus activity in older adults correlates with decreased ability to process ambiguous facial expressions.", "I hypothesise that enhanced locus coeruleus to dorsolateral prefrontal cortex connectivity in older adults predicts higher emotional resilience scores.", "I hypothesise that younger adults with higher locus coeruleus activity during ambiguity processi…	Q1: I hypothesise that reduced locus coeruleus activity in older adults correlates with decreased ability to process ambiguous facial expressions. Q2: I hypothesise that enhanced locus coeruleus to dorsolateral prefrontal cortex connectivity in older adults predicts higher emotional resilience scores. Q3: I hypothesise that younger adults with higher locus coeruleus activity during ambiguity proc…	I hypothesise that reduced locus coeruleus activity in older adults correlates with decreased ability to process ambiguous facial expressions.	I hypothesise that enhanced locus coeruleus to dorsolateral prefrontal cortex connectivity in older adults predicts higher emotional resilience scores.	I hypothesise that younger adults with higher locus coeruleus activity during ambiguity processing report lower mental well-being.
10.1101/2025.08.31.673173	Germline stem cell isolation, lineage tracing, and aging in a protochordate	Levy, T.; Anselmi, C.; Ishizuka, K. J.; Gordon, T.; Voskoboynik, Y.; McGeever, E.; Detweiler, A. M.; Levin, L.; Palmeri, K. J.; Liu, D. D.; Sinha, R.; Ohene-Gambill, B. F.; Raveh, T.; Morri, M.; Vanni, V.; Manni, L.; Sahoo, D.; Neff, N. F.; Rosental, B.; Weissman, I. L.; Voskoboynik, A.	cell biology	2025-04-09	2	https://www.biorxiv.org/content/10.1101/2025.08.31.673173v2	Germline stem cells (GSCs), the source of gametes, are the only stem cells capable of passing genes to future generations and are therefore considered units of natural selection. Yet, the factors that influence GSC fitness, and thus govern GSC competition, which exist in both protochordates and mammals, remain poorly understood. We studied how aging affects GSC fitness in the protochordate Botryl…	[]	Q1: I hypothesise that reduced DDX4 expression in aged Botryllus schlosseri GSCs directly impairs their self-renewal capacity. Q2: I hypothesise that PIWIL1 downregulation in aged Botryllus schlosseri GSCs leads to increased DNA damage accumulation. Q3: I hypothesise that GSC transplantation from young to old Botryllus schlosseri can restore reproductive function.	I hypothesise that reduced DDX4 expression in aged Botryllus schlosseri GSCs directly impairs their self-renewal capacity.	I hypothesise that PIWIL1 downregulation in aged Botryllus schlosseri GSCs leads to increased DNA damage accumulation.	I hypothesise that GSC transplantation from young to old Botryllus schlosseri can restore reproductive function.
10.1101/2025.08.26.672402	Toward Robust Neuroanatomical Normative Models: Influence of Sample Size and Covariates Distributions	Elleaume, C.; Hebling Vieira, B.; Floris, D. L.; Langer, N.	neuroscience	2025-01-09	2	https://www.biorxiv.org/content/10.1101/2025.08.26.672402v2	Normative models are increasingly used to characterize individual-level brain deviations in neuroimaging studies, but their performance depends heavily on the reference sample used for training or adaptation. In this study, we systematically investigated how sample size and covariate composition of the reference cohort influence model fit, deviation estimates, and clinical readouts in Alzheimers …	[]	Q1: I hypothesise that increasing reference sample size for neuroimaging normative models improves deviation estimation accuracy in aging individuals. Q2: I hypothesise that demographic alignment, particularly age, in reference samples is critical for reliable neuroimaging deviation estimates in aging. Q3: I hypothesise that adaptive transfer learning with large-scale pre-training reduces the req…	I hypothesise that increasing reference sample size for neuroimaging normative models improves deviation estimation accuracy in aging individuals.	I hypothesise that demographic alignment, particularly age, in reference samples is critical for reliable neuroimaging deviation estimates in aging.	I hypothesise that adaptive transfer learning with large-scale pre-training reduces the required demographically matched sample size for robust neuroimaging models in aging.
10.1101/2025.08.19.671148	N-acetylcarnosine attenuates age-associated declines in multi-organ systems to improve survival	Miranda, E. R.; Shahtout, J. L.; Watanabe, S.; Spaas, J.; Milam, N. Y.; Neiswanger, G.; Werbner, B.; Stuart, D.; Mookherjee, S.; Wilson, J.; Judge, M.; Goh, I. Y.; Slater, T.; Gallop, M. R.; Hu, G.; Karasawa, T.; Landers, J. K.; Rainbow, B.; O'Connor, K. T.; Black, N. J.; Lan, H.; Nikolova, L. S.; Li, Y.; Davey, C. F.; Cox, J. E.; Boudina, S.; Karner, C. M.; Harasymowicz, N. S.; Ramkumar, N.; Sym…	physiology	25/08/2025	2	https://www.biorxiv.org/content/10.1101/2025.08.19.671148v2	Introductory ParagraphHistidine containing dipeptides (HCDs) such as N-acetylcarnosine are endogenous metabolites that are ergogenic and mitigate metabolic dysfunction. We previously demonstrated that short-term N-acetylcarnosine treatment is highly efficacious in protecting muscle atrophy induced by disuse. Here we demonstrate that a 6-months treatment of N-acetylcarnosine attenuates a broad spe…	[]	Q1: I hypothesise N-acetylcarnosine treatment extends lifespan in female mice by attenuating age-associated declines in adiposity and diastolic function. Q2: I hypothesise N-acetylcarnosine treatment improves muscle strength and bone density in aged female mice. Q3: I hypothesise N-acetylcarnosine treatment prevents age-associated vasodilation decline in female mice.	I hypothesise N-acetylcarnosine treatment extends lifespan in female mice by attenuating age-associated declines in adiposity and diastolic function.	I hypothesise N-acetylcarnosine treatment improves muscle strength and bone density in aged female mice.	I hypothesise N-acetylcarnosine treatment prevents age-associated vasodilation decline in female mice.
10.1101/2025.08.12.669858	Circular continuum of alpha motoneuron types	Garrett, T. L.; Wintermute, L.; Armitage, M.; Ward, S.; Abdul Halim, I.; Mousa, M. H.; Gerber, K.; Elbasiouny, S. M.	neuroscience	28/08/2025	2	https://www.biorxiv.org/content/10.1101/2025.08.12.669858v2	Alpha-motoneurons (-MNs) are traditionally classified into slow (S), fast fatigue-resistant (FR), and fast-fatigable (FF), which exist along a continuum of properties between slow and fast, enabling the generation of graded force and seamless movement. Using combinations of markers, we developed novel immunohistochemistry protocols that enabled co-labeling of six major and transitional -MN types …	[]	Q1: I hypothesise that the S/FF alpha-motoneuron subtype exhibits increased resistance to age-related degeneration compared to S or FF subtypes. Q2: I hypothesise that the novel FR/FI alpha-motoneuron subtype displays distinct electrophysiological properties not observed in traditional FR or FI types.	I hypothesise that the S/FF alpha-motoneuron subtype exhibits increased resistance to age-related degeneration compared to S or FF subtypes.	I hypothesise that the novel FR/FI alpha-motoneuron subtype displays distinct electrophysiological properties not observed in traditional FR or FI types.
10.1101/2025.08.08.668946	MechanoAge, a machine learning platform to identify individuals susceptible to breast cancer based on mechanical properties of single cells	Hinz, S.; Grondal, S. M.; Miyano, M.; Lopez, J. C.; Cotner, K. L.; Thomsen, T.; Chen, C.; Hester, E. J.; Yee, L. D.; Seewaldt, V. E.; Lorens, J. B.; Sohn, L. L.; LaBarge, M. A.	cancer biology	13/08/2025	2	https://www.biorxiv.org/content/10.1101/2025.08.08.668946v2	BackgroundExisting breast cancer risk models inadequately identify individuals at latent risk, particularly among women without known genetic mutations or family history. Risk is often underestimated or overestimated due to reliance on population-level data and neglect of cellular aging and mechanobiological alterations. MethodsWe profiled primary human mammary epithelial cells (HMECs) from women…	[]	Q1: I hypothesise that elevated mechano-RISQ scores in mammary epithelial cells predict increased breast cancer incidence in women without known genetic mutations. Q2: I hypothesise that KRT14 overexpression in younger mammary epithelial cells accelerates cellular senescence markers. Q3: I hypothesise that reducing KRT14 levels in older mammary epithelial cells reverses age-related mechanical alt…	I hypothesise that elevated mechano-RISQ scores in mammary epithelial cells predict increased breast cancer incidence in women without known genetic mutations.	I hypothesise that KRT14 overexpression in younger mammary epithelial cells accelerates cellular senescence markers.	I hypothesise that reducing KRT14 levels in older mammary epithelial cells reverses age-related mechanical alterations.
10.1101/2025.08.05.668798	Time-Resolved Transcriptomics Reveal Spliceosomal Disruption and Senescence Pathways in Crocin-Treated Hepatocellular Carcinoma Cells	Nelson, D. R.; Chaiboonchoe, A.; Fu, W.; Alzahmi, A. S.; Al-Hrout, A.; Amin, A.; Salehi-Ashtiani, K.	cancer biology	2025-09-08	2	https://www.biorxiv.org/content/10.1101/2025.08.05.668798v2	Natural products like saffron show promise in treating hepatocellular carcinoma (HCC), but their mechanisms remain unclear. Here, we used time-series transcriptomics to elucidate crocins anti-cancer mechanisms in HCC cells. We treated HepG2 cells with 1 and 2 mM crocin for 2, 6, 12, and 24 hours and analyzed transcriptomic profiles at each timepoint. The strongest transcriptional response occurre…	[]	Q1: I hypothesise that crocin treatment induces cellular senescence in hepatocellular carcinoma cells by downregulating spliceosomal machinery genes. Q2: I hypothesise that crocin treatment suppresses hepatocellular carcinoma cell proliferation by activating DNA damage checkpoints. Q3: I hypothesise that crocin treatment reverses non-alcoholic fatty liver disease pathways in hepatocellular carcin…	I hypothesise that crocin treatment induces cellular senescence in hepatocellular carcinoma cells by downregulating spliceosomal machinery genes.	I hypothesise that crocin treatment suppresses hepatocellular carcinoma cell proliferation by activating DNA damage checkpoints.	I hypothesise that crocin treatment reverses non-alcoholic fatty liver disease pathways in hepatocellular carcinoma cells.
10.1101/2025.08.05.668696	AT-HOOK-MOTIF NUCLEAR LOCALIZED 15 extends plant longevity by binding at poorly accessible, epigenetic mark-depleted chromatin that surrounds transcribed regions	Luden, T.; Chouaref, J.; Offringa, R.	plant biology	2025-07-08	2	https://www.biorxiv.org/content/10.1101/2025.08.05.668696v2	Members of the AT-HOOK MOTIF NUCLEAR LOCALIZED (AHL) gene family have been shown to play important roles in plant development. In Arabidopsis thaliana, one member of this family, AHL15, induces somatic embryogenesis and extends plant longevity when overexpressed - the latter through strong repression of several ageing-related developmental transitions. However, its direct target genes and the mec…	[]	Q1: I hypothesise AHL15 represses aging-related genes by binding near their transcription start sites. Q2: I hypothesise AHL15 downregulates genes by binding near their transcription end sites. Q3: I hypothesise AHL15 alters gene expression by affecting chromatin 3D organization, not accessibility.	I hypothesise AHL15 represses aging-related genes by binding near their transcription start sites.	I hypothesise AHL15 downregulates genes by binding near their transcription end sites.	I hypothesise AHL15 alters gene expression by affecting chromatin 3D organization, not accessibility.
10.1101/2025.07.31.667922	Integrative Analysis of the Mouse Cecal Microbiome Across Diet, Age, and Metabolic State in the Diverse BXD Population	Zhou, Z.; Lamanna, A.; Halder, R.; Pansart, E.; Boussoufa, B.; Kerkour, T.; Wilmes, P.; Williams, E. G.	microbiology	2025-10-08	2	https://www.biorxiv.org/content/10.1101/2025.07.31.667922v2	BackgroundThe gut microbiota both adapts to, and shapes, the hosts metabolic state through metabolites and gene regulatory networks, influencing multiple organs via axes such as the gut-liver connection. While diet, age, and host genetics each modulate gut microbial composition, their combined effects and mechanistic links to host molecular phenotypes remain poorly understood. Integrated multi-om…	[]	Q1: I hypothesise that Lachnospiraceae abundance is negatively correlated with host Ido1 expression in the cecum. Q2: I hypothesise that microbial profiles can predict host chronological age with high accuracy. Q3: I hypothesise that integrating microbial features with liver proteomics improves body weight prediction.	I hypothesise that Lachnospiraceae abundance is negatively correlated with host Ido1 expression in the cecum.	I hypothesise that microbial profiles can predict host chronological age with high accuracy.	I hypothesise that integrating microbial features with liver proteomics improves body weight prediction.
10.1101/2025.07.28.667224	Pharmacologic activation of ÃƒÅ½Ã¢â‚¬Â_x009d_133p53ÃƒÅ½Ã‚Â± reduces cellular senescence in progeria patients-derived cells	Joruiz, S. M.; Lissa, D.; von Muhlinen, N.; Dranchak, P.; Inglese, J.; Horikawa, I.; Harris, C. C.	cell biology	2025-02-08	2	https://www.biorxiv.org/content/10.1101/2025.07.28.667224v2	BackgroundPatients with Hutchinson-Gilford progeria syndrome (HGPS) show accelerated aging phenotypes and have shortened lifespan, with implications in physiological aging processes as well. While therapeutic approaches targeting the disease-causing abnormal protein, progerin, have been developed, further efforts to explore mechanistically distinct and complementary strategies are still critical …	[]	Q1: I hypothesise that celastrol treatment reduces SA-beta-gal positive cells in HGPS fibroblasts. Q2: I hypothesise that AZD1981 treatment reduces IL-6 secretion in HGPS fibroblasts. Q3: I hypothesise that increased Delta133p53 expression correlates with reduced p21WAF1 expression in HGPS cells.	I hypothesise that celastrol treatment reduces SA-beta-gal positive cells in HGPS fibroblasts.	I hypothesise that AZD1981 treatment reduces IL-6 secretion in HGPS fibroblasts.	I hypothesise that increased Delta133p53 expression correlates with reduced p21WAF1 expression in HGPS cells.
10.1101/2025.07.27.667059	Aging-enhanced accumulation of fibroblasts excludes oligodendrocytes in demyelinated lesions	Lozinski, B. M.; D'Mello, C.; Dong, Y.; Melchor, G. S.; Ghorbani, S.; Li, C.; Morch, M.; Moezzi, D.; Jain, R.; Nezhad, P. E.; Ling, C.-C.; Huang, J.; Camara-Lemarroy, C.; Yong, V. W.	neuroscience	31/07/2025	2	https://www.biorxiv.org/content/10.1101/2025.07.27.667059v2	Fibroblast dysregulation contributes to aberrant repair and pathological fibrosis. Emerging evidence suggest that fibroblasts accumulate in lesions following central nervous system injury, but whether and how they influence oligodendrocytes and myeloid cell responses, especially in aging, is uncertain. Here we report that fibroblasts infiltrate the parenchyma of spinal cord white matter (SCWM) le…	[]	Q1: I hypothesise that increased fibroblast accumulation in aging demyelinated lesions directly inhibits oligodendrocyte precursor cell (OPC) differentiation. Q2: I hypothesise that aging exacerbates fibroblast-mediated fibrosis in demyelinated lesions, impairing central nervous system repair. Q3: I hypothesise that microglia/macrophages promote fibroblast invasion into demyelinated lesions, cont…	I hypothesise that increased fibroblast accumulation in aging demyelinated lesions directly inhibits oligodendrocyte precursor cell (OPC) differentiation.	I hypothesise that aging exacerbates fibroblast-mediated fibrosis in demyelinated lesions, impairing central nervous system repair.	I hypothesise that microglia/macrophages promote fibroblast invasion into demyelinated lesions, contributing to pathology.
10.1101/2025.07.25.666857	Concurrent presentation of memory-related odors and sounds nullified sleep reactivation benefits	Subramanian, G.; Zelano, C.; Paller, K. A.; Schechtman, E.	neuroscience	21/08/2025	2	https://www.biorxiv.org/content/10.1101/2025.07.25.666857v2	Reactivation of recently acquired memories during sleep supports their longevity. Reactivation can be biased during sleep using odors or sounds through a technique termed targeted memory reactivation (TMR). Here, we attempted to selectively weaken memories by reactivating them together with forgetting instructions. We delivered sounds to reactivate spatial memories and concurrent odors to reactiv…	[]	Q1: I hypothesise that concurrent odor presentation during sleep disrupts sound-induced spatial memory reactivation. Q2: I hypothesise that odors linked to memory instructions interfere with sleep-based memory reactivation more than neutral odors. Q3: I hypothesise that concurrent odor presentation during sleep reduces sigma EEG power for at least 10 seconds post-odor.	I hypothesise that concurrent odor presentation during sleep disrupts sound-induced spatial memory reactivation.	I hypothesise that odors linked to memory instructions interfere with sleep-based memory reactivation more than neutral odors.	I hypothesise that concurrent odor presentation during sleep reduces sigma EEG power for at least 10 seconds post-odor.
10.1101/2025.01.09.632092	Aggregation of HAPLN2, a component of the perinodal extracellular matrix, is a hallmark of physiological brain aging in mice	Watanabe, A.; Hirayama, S.; Kominato, I.; Marchese, S.; Esposito, P.; Metodieva, V.; Kimura, T.; Kameda, H.; Sano, T.; Takatori, S.; Takao, M.; Koike, M.; Varela, J. A.; Tomita, T.; Murata, S.	biochemistry	2025-02-07	2	https://www.biorxiv.org/content/10.1101/2025.01.09.632092v2	Protein aggregation is a hallmark of neurodegenerative diseases and is also observed in the brains of elderly individuals without such conditions, suggesting that aging drives the accumulation of protein aggregates. However, the comprehensive understanding of age-dependent protein aggregates involved in brain aging remains unclear. Here, we investigated proteins that become sarkosyl-insoluble wit…	[]	Q1: I hypothesise that reducing HAPLN2 aggregation will decrease microglial inflammatory responses in aged mouse brains. Q2: I hypothesise that impaired microglial function directly causes HAPLN2 aggregation in the aging mouse brain. Q3: I hypothesise that elevated hyaluronic acid levels in aged mouse brains promote HAPLN2 aggregation.	I hypothesise that reducing HAPLN2 aggregation will decrease microglial inflammatory responses in aged mouse brains.	I hypothesise that impaired microglial function directly causes HAPLN2 aggregation in the aging mouse brain.	I hypothesise that elevated hyaluronic acid levels in aged mouse brains promote HAPLN2 aggregation.
10.1101/2024.06.04.597306	Altered dynamics of ATP synthase cause functional irregularities in senescent hiPS-cardiomyocytes	Morris, S.; Schmelter, F.; Molina Riquelme, I. E.; Peischard, S.; Disse, P.; Seebohm, G.; Eisner Sagues, V. R.; Busch, K. B.	cell biology	2025-11-02	2	https://www.biorxiv.org/content/10.1101/2024.06.04.597306v2	Heart disease is the leading cause of death in the elderly population and the heart is a highly energy-consuming tissue. Aging-related heart failure is often driven by energy depletion in cardiomyocytes (CM), which rely on their abundant, cristae-dense mitochondria for ATP production. ATP synthase, localized along the cristae rims, plays a critical role in energy conversion, but the connection be…	["I hypothesise that reduced ATP synthase mobility in senescent cardiomyocytes directly impairs ATP production.", "I hypothesise that increased inner membrane curvature in senescent cardiomyocytes causes reduced ATP synthase activity.", "I hypothesise that altered ATP synthase organization in senescent cardiomyocytes leads to irregular beating patterns."]	Q1: I hypothesise that reduced ATP synthase mobility in senescent cardiomyocytes directly impairs ATP production. Q2: I hypothesise that increased inner membrane curvature in senescent cardiomyocytes causes reduced ATP synthase activity. Q3: I hypothesise that altered ATP synthase organization in senescent cardiomyocytes leads to irregular beating patterns.	I hypothesise that reduced ATP synthase mobility in senescent cardiomyocytes directly impairs ATP production.	I hypothesise that increased inner membrane curvature in senescent cardiomyocytes causes reduced ATP synthase activity.	I hypothesise that altered ATP synthase organization in senescent cardiomyocytes leads to irregular beating patterns.
10.1101/2024.06.04.596782	Pathogenicity of Commensal Gut Biofilm In Prefrail Aging	Le Cosquer, G.; Pannier, M.; Meunier, E. S.; Thevenin, J.; Pyhourquet, E.; Guyonnet, S.; Vellas, B.; Santin, Y.; Guiard, B.; Parini, A.; Buscail, L.; Bournet, B.; Guillemet, D.; Deraison, C.; Vergnolle, N.; Motta, J. P.	microbiology	20/05/2025	2	https://www.biorxiv.org/content/10.1101/2024.06.04.596782v2	Pathophysiological mechanisms of unhealthy aging, particularly the transition from robustness to frailty, remain poorly understood. Despite extensive microbiome research on taxonomy, the behavior of early prefrail gut bacteria in their natural community-host mucosal tissue context remains unexplored. Using fecal samples from the INSPIRE-T aging human cohort, we characterized gut microbiota phenot…	["I hypothesise that prefrail-derived gut biofilms exhibit increased epithelial cell damage compared to robust biofilms.", "I hypothesise that grape pomace extract reduces pro-inflammatory cytokine release from prefrail gut biofilms.", "I hypothesise that prefrail gut microbiota transplantation into antibiotic-treated mice exacerbates colon inflammation."]	Q1: I hypothesise that prefrail-derived gut biofilms exhibit increased epithelial cell damage compared to robust biofilms. Q2: I hypothesise that grape pomace extract reduces pro-inflammatory cytokine release from prefrail gut biofilms. Q3: I hypothesise that prefrail gut microbiota transplantation into antibiotic-treated mice exacerbates colon inflammation.	I hypothesise that prefrail-derived gut biofilms exhibit increased epithelial cell damage compared to robust biofilms.	I hypothesise that grape pomace extract reduces pro-inflammatory cytokine release from prefrail gut biofilms.	I hypothesise that prefrail gut microbiota transplantation into antibiotic-treated mice exacerbates colon inflammation.
10.1101/2024.06.03.592804	Reliability of structural brain change in cognitively healthy adult samples.	Vidal-Pineiro, D.; Sorensen, O.; Stromstad, M.; Amlien, I. K.; Anderson, M.; Baare, W. F. C.; Bartres-Faz, D.; Brandmaier, A. M.; Brathen, A. C.; Garrido, P.; Ghisletta, P.; Grydeland, H.; Henson, R. N.; Kievit, R. A.; Korbmacher, M.; Kuhn, S.; Lindenberger, U.; Mowinckel, A. M.; Nyberg, L.; Roe, J. M.; Sneve, M. H.; Sole-Padulles, C.; Watne, L.-O.; Walhovd, K. B.; Fjell, A. M.	neuroscience	20/02/2025	2	https://www.biorxiv.org/content/10.1101/2024.06.03.592804v2	In neuroimaging research, tracking individuals over time is key to understanding the interplay between brain changes and genetic, environmental, or cognitive factors across the lifespan. Yet, the extent to which we can estimate the individual trajectories of brain change over time with precision remains uncertain. In this study, we estimated the reliability of structural brain change in cognitive…	["I hypothesise that younger adults exhibit lower reliability of structural brain change than older adults.", "I hypothesise that longer follow-up times increase the reliability of detecting structural brain aging.", "I hypothesise that subcortical volume measurements are more reliable indicators of brain aging than cortical measures."]	Q1: I hypothesise that younger adults exhibit lower reliability of structural brain change than older adults. Q2: I hypothesise that longer follow-up times increase the reliability of detecting structural brain aging. Q3: I hypothesise that subcortical volume measurements are more reliable indicators of brain aging than cortical measures.	I hypothesise that younger adults exhibit lower reliability of structural brain change than older adults.	I hypothesise that longer follow-up times increase the reliability of detecting structural brain aging.	I hypothesise that subcortical volume measurements are more reliable indicators of brain aging than cortical measures.
10.1101/2024.05.23.595504	Human hypothalamic neural stem cells transplantation ameliorates age-associated dysfunction through SNS/eNAMPT axis activation in aged mice	Sulistio, Y. A.; Pieknell, K.; Hong, S.; Lee, Y.; Kim, M. S.; Park, W.-Y.; Han, K. Y.; Hong, T.; Park, K.-S.; Yoon, S. G.; Kim, I. Y.; Seong, J. K.; Lee, T. Y.; Kim, M. S.; Lee, S.-H.	cell biology	2025-05-03	2	https://www.biorxiv.org/content/10.1101/2024.05.23.595504v2	The hypothalamus is the brain region that regulates systemic body metabolism and multiple brain functions. The adult hypothalamus harbors neural stem/precursor cell (NSC)-like cells. Along with age-related body changes, the hypothalamic NSC (htNSC) population declines, indicating the potential of htNSC replacement as an anti-aging strategy. Here, we developed protocol to generate htNSCs from huma…	["I hypothesise that human hypothalamic neural stem cell transplantation in aged mice increases systemic eNAMPT levels.", "I hypothesise that human hypothalamic neural stem cell transplantation in aged mice improves metabolic fitness and cognitive function.", "I hypothesise that sympathetic nervous system activation mediates the anti-aging effects of hypothalamic neural stem cell transplantation.…	Q1: I hypothesise that human hypothalamic neural stem cell transplantation in aged mice increases systemic eNAMPT levels. Q2: I hypothesise that human hypothalamic neural stem cell transplantation in aged mice improves metabolic fitness and cognitive function. Q3: I hypothesise that sympathetic nervous system activation mediates the anti-aging effects of hypothalamic neural stem cell transplantat…	I hypothesise that human hypothalamic neural stem cell transplantation in aged mice increases systemic eNAMPT levels.	I hypothesise that human hypothalamic neural stem cell transplantation in aged mice improves metabolic fitness and cognitive function.	I hypothesise that sympathetic nervous system activation mediates the anti-aging effects of hypothalamic neural stem cell transplantation.
10.1101/2024.05.17.594606	Scalable Screening of Ternary-Code DNA methylation Dynamics Associated with Human Traits.	Goldberg, D. C.; Cloud, C.; Lee, S. M.; Barnes, B.; Gruber, S.; Kim, E.; Pottekat, A.; Westphal, M. S.; McAuliffe, L.; Majournie, E.; KalayilManian, M.; Zhu, Q.; Tran, C.; Hansen, M.; Stojakovic, J.; Parker, J. B.; Kohli, R. M.; Porecha, R.; Renke, N.; Zhou, W.	genomics	2025-11-02	2	https://www.biorxiv.org/content/10.1101/2024.05.17.594606v2	Epigenome-wide association studies (EWAS) are transforming our understanding of the interplay between epigenetics and complex human traits and phenotypes. We introduce the Methylation Screening Array (MSA), a new iteration of the Infinium technology for scalable and quantitative screening of trait associations of nuanced ternary-code cytosine modifications in larger, more inclusive, and stratifie…	[]	Q1: I hypothesise that increased 5hmC levels in specific tissues correlate with slower biological aging. Q2: I hypothesise that tissue-specific rates of mitotic hypermethylation are inversely proportional to cellular senescence. Q3: I hypothesise that 5hmC dynamics are a significant predictor of longevity across diverse human populations.	I hypothesise that increased 5hmC levels in specific tissues correlate with slower biological aging.	I hypothesise that tissue-specific rates of mitotic hypermethylation are inversely proportional to cellular senescence.	I hypothesise that 5hmC dynamics are a significant predictor of longevity across diverse human populations.
10.1101/2024.05.14.594256	Inhibition of mTORC1 by rapamycin results in feedback activation of Akt S473 and aggravates hallmarks of osteoarthritis in female mice and non-human primates	Minton, D. M.; Ailiani, A. R.; Focht, M. D. K.; Kersh, M. E.; Lii, A.; Elliehausen, C. J.; Sonsalla, M. M.; Lamming, D. W.; Marolf, A. J.; Santangelo, K. S.; Salmon, A. B.; Konopka, A. R.	physiology	2025-06-03	2	https://www.biorxiv.org/content/10.1101/2024.05.14.594256v2	PurposeGenetic deletion of mTOR has protected against post-traumatic osteoarthritis (OA) in male mice, however, effects of pharmacological mTOR-inhibition are equivocal and have not been tested in aging models nor in female subjects. Therefore, the goal of this study was to determine if mTOR-inhibition by rapamycin can modify OA pathology in aging non-human primates and female mice. MethodsCommon…	["I hypothesise that rapamycin treatment exacerbates osteoarthritis in female mice by increasing meniscus calcification.", "I hypothesise that rapamycin treatment worsens cartilage pathology in aging female non-human primates.", "I hypothesise that feedback activation of AktS473 by rapamycin contributes to osteoarthritis progression in female mice."]	Q1: I hypothesise that rapamycin treatment exacerbates osteoarthritis in female mice by increasing meniscus calcification. Q2: I hypothesise that rapamycin treatment worsens cartilage pathology in aging female non-human primates. Q3: I hypothesise that feedback activation of AktS473 by rapamycin contributes to osteoarthritis progression in female mice.	I hypothesise that rapamycin treatment exacerbates osteoarthritis in female mice by increasing meniscus calcification.	I hypothesise that rapamycin treatment worsens cartilage pathology in aging female non-human primates.	I hypothesise that feedback activation of AktS473 by rapamycin contributes to osteoarthritis progression in female mice.
10.1101/2024.05.13.593984	Effects of focal epilepsy and aging on discrimination and reactivation of memories	Tai, X. Y.; Sen, A.; Husain, M.; Manohar, S. G.	neuroscience	21/05/2025	2	https://www.biorxiv.org/content/10.1101/2024.05.13.593984v2	How are memories stored and subsequently retrieved? Pattern separation and pattern completion are distinct neurocognitive hippocampal processes that are thought to facilitate encoding and retrieval of memories. However, the way in which these operations affect the quality of memory remains unclear and there is currently no single behavioural task in humans to measure both mechanisms simultaneousl…	["I hypothesise that aging specifically impairs pattern separation ability in healthy individuals.", "I hypothesise that focal epilepsy specifically impairs pattern completion ability in individuals.", "I hypothesise that distinct neuronal population disruptions underlie age-related pattern separation deficits."]	Q1: I hypothesise that aging specifically impairs pattern separation ability in healthy individuals. Q2: I hypothesise that focal epilepsy specifically impairs pattern completion ability in individuals. Q3: I hypothesise that distinct neuronal population disruptions underlie age-related pattern separation deficits.	I hypothesise that aging specifically impairs pattern separation ability in healthy individuals.	I hypothesise that focal epilepsy specifically impairs pattern completion ability in individuals.	I hypothesise that distinct neuronal population disruptions underlie age-related pattern separation deficits.
10.1101/2024.05.07.592982	Survival, Movement, and Lifespan: Decoding the Roles of Patched-Related (Ptr) in Drosophila melanogaster	Parada, C.; Prieto, D.	developmental biology	30/01/2025	2	https://www.biorxiv.org/content/10.1101/2024.05.07.592982v2	Patched-related (Ptr) is a transmembrane protein implicated in developmental processes in Drosophila melanogaster, yet its precise role remains incompletely understood. Here, we use Ptr23c null mutants to investigate the functional significance of Ptr through the entire life cycle monitoring survival during embryonic, larval, pupal and adult development, and studying larval locomotion and muscle …	["I hypothesise that Ptr23c loss-of-function causes increased somatic muscle nuclear size.", "I hypothesise that Ptr23c deficiency in Drosophila melanogaster extends adult lifespan.", "I hypothesise that Ptr23c is required for normal larval locomotion in Drosophila melanogaster."]	Q1: I hypothesise that Ptr23c loss-of-function causes increased somatic muscle nuclear size. Q2: I hypothesise that Ptr23c deficiency in Drosophila melanogaster extends adult lifespan. Q3: I hypothesise that Ptr23c is required for normal larval locomotion in Drosophila melanogaster.	I hypothesise that Ptr23c loss-of-function causes increased somatic muscle nuclear size.	I hypothesise that Ptr23c deficiency in Drosophila melanogaster extends adult lifespan.	I hypothesise that Ptr23c is required for normal larval locomotion in Drosophila melanogaster.
10.1101/2024.05.03.592475	Estropausal gut microbiota transplant improves measures of ovarian function in adult mice	Kim, M.; Wang, J.; Pilley, S. E.; Lu, R. J.; Xu, A.; Kim, Y.; Liu, M.; Fu, X.; Booth, S. L.; Mullen, P. J.; Benayoun, B. A.	physiology	26/02/2025	2	https://www.biorxiv.org/content/10.1101/2024.05.03.592475v2	Decline in ovarian function with age not only affects fertility but is also linked to a higher risk of age-related diseases in women (e.g. osteoporosis, dementia). Intriguingly, earlier menopause is linked to shorter lifespan; however, the underlying molecular mechanisms of ovarian aging are not well understood. Recent evidence suggests the gut microbiota may influence ovarian health. In this stu…	["I hypothesise that estropausal gut microbiota transplantation restores ovarian gene expression profiles towards a younger state in adult mice.", "I hypothesise that specific microbial species identified in estropausal mice mediate the improvement in ovarian function after transplantation.", "I hypothesise that estropausal gut microbiota transplantation reduces inflammation-related gene expressi…	Q1: I hypothesise that estropausal gut microbiota transplantation restores ovarian gene expression profiles towards a younger state in adult mice. Q2: I hypothesise that specific microbial species identified in estropausal mice mediate the improvement in ovarian function after transplantation. Q3: I hypothesise that estropausal gut microbiota transplantation reduces inflammation-related gene expr…	I hypothesise that estropausal gut microbiota transplantation restores ovarian gene expression profiles towards a younger state in adult mice.	I hypothesise that specific microbial species identified in estropausal mice mediate the improvement in ovarian function after transplantation.	I hypothesise that estropausal gut microbiota transplantation reduces inflammation-related gene expression in the mouse ovary.
10.1101/2025.07.08.663701	Deep mapping of the endomembrane system of cerebellar Purkinje neurons	Haberl, M. G.; Viana da Silva, S.; Phan, S.; Bushong, E.; Deerinck, T.; Ellisman, M. H.	neuroscience	14/07/2025	2	https://www.biorxiv.org/content/10.1101/2025.07.08.663701v2	Neuronal function relies on the precise spatial organization of intracellular membrane-bounded organelles involved in anabolism and Ca2+ sequestration, such as the Golgi apparatus, mitochondria and the endoplasmic reticulum (ER), along with structures involved in catabolism, such as lysosomes. Despite their known roles in energy supply, calcium homeostasis, and proteostasis, our understanding of …	["I hypothesise that altered ER-mitochondria contact sites in Purkinje neurons contribute to age-related decline in cerebellar function.", "I hypothesise that specific subcellular regional variations in ER and mitochondria distribution in Purkinje neurons are critical for maintaining neuronal longevity.", "I hypothesise that disruption of ER-mitochondria association domains within Purkinje neuron…	Q1: I hypothesise that altered ER-mitochondria contact sites in Purkinje neurons contribute to age-related decline in cerebellar function. Q2: I hypothesise that specific subcellular regional variations in ER and mitochondria distribution in Purkinje neurons are critical for maintaining neuronal longevity. Q3: I hypothesise that disruption of ER-mitochondria association domains within Purkinje ne…	I hypothesise that altered ER-mitochondria contact sites in Purkinje neurons contribute to age-related decline in cerebellar function.	I hypothesise that specific subcellular regional variations in ER and mitochondria distribution in Purkinje neurons are critical for maintaining neuronal longevity.	I hypothesise that disruption of ER-mitochondria association domains within Purkinje neurons leads to increased cellular senescence.
10.1101/2025.06.30.660585	Reporting quality, effect sizes, and biases for aging interventions: a methodological appraisal of the DrugAge database	Parish, A.; Ioannidis, J.; Zhang, K.; Barardo, D.; Swindell, W.; de Magalhaes, J. P.	physiology	2025-12-07	2	https://www.biorxiv.org/content/10.1101/2025.06.30.660585v2	Though interest has grown significantly over the past decades in interventions that may slow the aging process, most evidence for these interventions still comes from experiments in non-human animals. These studies may suffer from design, quality and reporting issues. The quality and reporting of preclinical studies have not yet been studied systematically in anti-aging research. Here we analyzed…	[]	Q1: I hypothesise that randomization and blinding are underreported in preclinical aging intervention studies. Q2: I hypothesise that anti-aging intervention effects reported in non-mammals do not translate to mammals. Q3: I hypothesise that initiating aging interventions later in life will yield different effect sizes than early initiation.	I hypothesise that randomization and blinding are underreported in preclinical aging intervention studies.	I hypothesise that anti-aging intervention effects reported in non-mammals do not translate to mammals.	I hypothesise that initiating aging interventions later in life will yield different effect sizes than early initiation.
10.1101/2025.06.26.661690	Altered Brain Energy Metabolism in the APPPS1 Alzheimer's Model during anesthesia: Integration of Experimental Data and In Silico Modeling	Schunack, J.; Riepe, G.; Heppner, F. L.; Textoris-Taube, K.; Wallach, I.; MuÃƒÅ’Ã‹â€ lleder, M.; Liotta, A.; Jendrach, M.; Berndt, N.	neuroscience	30/06/2025	2	https://www.biorxiv.org/content/10.1101/2025.06.26.661690v2	BackgroundSynaptic transmission and network activity rely on high ATP turnover. Impairments in cerebral energy metabolism are increasingly recognized as central in aging and Alzheimers disease (AD) pathogenesis. Elderly patients and patients with AD are also at elevated risk for perioperative neurological complications, including post-operative delirium and further cognitive deterioration. Howeve…	["I hypothesise that APPPS1 mice exhibit reduced ATP generation capacity compared to wild-type mice.", "I hypothesise that isoflurane exposure further suppresses cerebral metabolic rate of oxygen in APPPS1 mice.", "I hypothesise that anesthetic exposure exacerbates deficits in extracellular potassium clearance in APPPS1 mice."]	Q1: I hypothesise that APPPS1 mice exhibit reduced ATP generation capacity compared to wild-type mice. Q2: I hypothesise that isoflurane exposure further suppresses cerebral metabolic rate of oxygen in APPPS1 mice. Q3: I hypothesise that anesthetic exposure exacerbates deficits in extracellular potassium clearance in APPPS1 mice.	I hypothesise that APPPS1 mice exhibit reduced ATP generation capacity compared to wild-type mice.	I hypothesise that isoflurane exposure further suppresses cerebral metabolic rate of oxygen in APPPS1 mice.	I hypothesise that anesthetic exposure exacerbates deficits in extracellular potassium clearance in APPPS1 mice.
10.1101/2025.06.24.661372	Deep and Quantitative Proteomic Profiling of Low Volume Mouse Serum Across the Lifespan	Dey, A. K.; Olinger, B.; Boroumand, M.; Fernandez, M. E.; SLAM investigators, ; Camandola, S.; Price, N. L.; de Cabo, R.; Basisty, N.	biochemistry	2025-07-07	2	https://www.biorxiv.org/content/10.1101/2025.06.24.661372v2	Assessing and validating circulating biomarkers is essential for the development of pre-clinical biomarkers that predict biological aging and aging-phenotypes in mice. However, comprehensive proteomics of serum, especially in longitudinal mouse studies, are limited by low volumes of samples. In this study, we develop a workflow for comprehensive and quantitative proteomic analysis of low volume m…	["I hypothesise that specific serum protein levels change predictably with age in mice.", "I hypothesise that identified serum proteins are associated with glucose levels in aging mice.", "I hypothesise that identified serum proteins are associated with body composition in aging mice."]	Q1: I hypothesise that specific serum protein levels change predictably with age in mice. Q2: I hypothesise that identified serum proteins are associated with glucose levels in aging mice. Q3: I hypothesise that identified serum proteins are associated with body composition in aging mice.	I hypothesise that specific serum protein levels change predictably with age in mice.	I hypothesise that identified serum proteins are associated with glucose levels in aging mice.	I hypothesise that identified serum proteins are associated with body composition in aging mice.
10.1101/2025.06.24.661261	Microbiome variations in osteoarthritis reflect aging and metabolic factors, not the disease	Bevc, K.; Malfertheiner, L.; Neuenschwander, S.; Tran, V. D. T.; Pagni, M.; Pantiukh, K.; Jagura, M.; Niiranen, T.; Knight, R. T.; Salomaa, V.; Havulinna, A. S.; Org, E.; Eklund, K. K.; Barreto, G.; Zenobi, M.; von Mering, C.	microbiology	20/08/2025	2	https://www.biorxiv.org/content/10.1101/2025.06.24.661261v2	The gut microbiome is crucial for human health. Its disruption has been linked to several chronic diseases, including joint disorders. The gut-joint axis has been implicated in the pathogenesis of osteoarthritis (OA), but conflicting findings and study limitations have led to uncertainty regarding the role of microbiota. We conducted a multi-cohort gut microbiota analysis in 1,395 OA patients fro…	["I hypothesise that increased age is associated with specific gut microbiome alterations in individuals with osteoarthritis.", "I hypothesise that higher BMI is associated with distinct gut microbiome profiles in individuals with osteoarthritis.", "I hypothesise that gut microbiome dysbiosis is not a primary driver of osteoarthritis progression."]	Q1: I hypothesise that increased age is associated with specific gut microbiome alterations in individuals with osteoarthritis. Q2: I hypothesise that higher BMI is associated with distinct gut microbiome profiles in individuals with osteoarthritis. Q3: I hypothesise that gut microbiome dysbiosis is not a primary driver of osteoarthritis progression.	I hypothesise that increased age is associated with specific gut microbiome alterations in individuals with osteoarthritis.	I hypothesise that higher BMI is associated with distinct gut microbiome profiles in individuals with osteoarthritis.	I hypothesise that gut microbiome dysbiosis is not a primary driver of osteoarthritis progression.
10.1101/2025.06.18.660440	TNF-ÃƒÅ½Ã‚Â±-induces type I IFN signalling to suppress neurogenesis and recruit T cells	Nissen, T. A. D.; Baig, A.; Rock, D. T.; Shibu, S.; Lee, H.; O'Neill, L. A.; John, S. S.; Klavinskis, L. S.; Thuret, S.	neuroscience	24/07/2025	2	https://www.biorxiv.org/content/10.1101/2025.06.18.660440v2	Adult hippocampal neurogenesis (AHN) is essential for learning, memory, and mood regulation, and its disruption is implicated in ageing, neurodegeneration, and mood disorders. However, the mechanisms linking inflammation to AHN impairment remain unclear. Here, we identify chronic tumour necrosis factor-alpha (TNF-) signalling as a key driver of neurogenic dysregulation via a previously unrecognis…	["I hypothesise TNF-ÃƒÅ½Ã‚Â± signalling directly suppresses human hippocampal progenitor cell neurogenesis.", "I hypothesise type I IFN signalling mediates TNF-ÃƒÅ½Ã‚Â±-induced suppression of neurogenesis.", "I hypothesise CXCR3-dependent T cell recruitment is required for TNF-ÃƒÅ½Ã‚Â±-induced neurogenesis suppression."]	Q1: I hypothesise TNF-ÃƒÅ½Ã‚Â± signalling directly suppresses human hippocampal progenitor cell neurogenesis. Q2: I hypothesise type I IFN signalling mediates TNF-ÃƒÅ½Ã‚Â±-induced suppression of neurogenesis. Q3: I hypothesise CXCR3-dependent T cell recruitment is required for TNF-ÃƒÅ½Ã‚Â±-induced neurogenesis suppression.	I hypothesise TNF-ÃƒÅ½Ã‚Â± signalling directly suppresses human hippocampal progenitor cell neurogenesis.	I hypothesise type I IFN signalling mediates TNF-ÃƒÅ½Ã‚Â±-induced suppression of neurogenesis.	I hypothesise CXCR3-dependent T cell recruitment is required for TNF-ÃƒÅ½Ã‚Â±-induced neurogenesis suppression.
10.1101/2025.01.09.632269	Age-related differences in the impact of background noise on neural speech tracking	Herrmann, B.	neuroscience	26/02/2025	2	https://www.biorxiv.org/content/10.1101/2025.01.09.632269v2	Tracking the envelope of speech in the brain is important for speech comprehension. Recent research suggests that acoustic background noise can enhance neural speech tracking, enabling the auditory system to robustly encode speech even under unfavorable conditions. Aging and hearing loss are associated with internal, neural noise in the auditory system, raising the question whether additional aco…	["I hypothesise that older adults exhibit higher baseline neural speech tracking than younger adults in quiet conditions.", "I hypothesise that minimal acoustic background noise enhances early neural speech tracking in younger adults but not in older adults.", "I hypothesise that increased internal neural noise in older adults' auditory cortex facilitates neural speech tracking in quiet."]	Q1: I hypothesise that older adults exhibit higher baseline neural speech tracking than younger adults in quiet conditions. Q2: I hypothesise that minimal acoustic background noise enhances early neural speech tracking in younger adults but not in older adults. Q3: I hypothesise that increased internal neural noise in older adults' auditory cortex facilitates neural speech tracking in quiet.	I hypothesise that older adults exhibit higher baseline neural speech tracking than younger adults in quiet conditions.	I hypothesise that minimal acoustic background noise enhances early neural speech tracking in younger adults but not in older adults.	I hypothesise that increased internal neural noise in older adults' auditory cortex facilitates neural speech tracking in quiet.
10.1101/2025.01.10.632375	Seeking rhythmic patterns in microglial cells within the circadian pineal gland from male rats	Freites, C. L.; Avila, M.; Amiotti, J. B.; Munoz, E. M.	neuroscience	29/01/2025	2	https://www.biorxiv.org/content/10.1101/2025.01.10.632375v2	Microglia, the innate immune cells of the brain, constitute a highly dynamic cell population that displays several functions influenced by the light:dark (L:D) cycle. Within the pineal gland (PG), a key organ of the circadian timing system, microglia actively participate in its development and homeostasis. However, little is known about their rhythmic features in this circadian organ. This study …	["I hypothesise that aged pineal microglia exhibit reduced phagocytic capacity compared to young pineal microglia at ZT18.", "I hypothesise that the diurnal rhythm of SIRP alpha expression in pineal microglia is abolished in 18-month-old rats.", "I hypothesise that nocturnal microglial morphology in the pineal gland is associated with reduced melatonin production."]	Q1: I hypothesise that aged pineal microglia exhibit reduced phagocytic capacity compared to young pineal microglia at ZT18. Q2: I hypothesise that the diurnal rhythm of SIRP alpha expression in pineal microglia is abolished in 18-month-old rats. Q3: I hypothesise that nocturnal microglial morphology in the pineal gland is associated with reduced melatonin production.	I hypothesise that aged pineal microglia exhibit reduced phagocytic capacity compared to young pineal microglia at ZT18.	I hypothesise that the diurnal rhythm of SIRP alpha expression in pineal microglia is abolished in 18-month-old rats.	I hypothesise that nocturnal microglial morphology in the pineal gland is associated with reduced melatonin production.
10.1101/2025.06.18.660418	Preserved cerebellar functions despite structural degeneration in older adults	de Witte, A.; Matthijs, A.; Parrell, B.; Mantini, D.; Gooijers, J.; Orban de Xivry, J.-J.	neuroscience	15/07/2025	2	https://www.biorxiv.org/content/10.1101/2025.06.18.660418v2	Aging is frequently perceived negatively due to its association with the decline of various brain and bodily functions. While it is evident that motor abilities deteriorate with age, it is incorrect to assume that all aspects of movement execution are equally affected. The cerebellum, a brain region that is closely involved in motor control among other functions, undergoes clear structural change…	[]	Q1: I hypothesise that older adults with cerebellar degeneration will perform equally well on cerebellar-specific motor tasks as younger adults. Q2: I hypothesise that sensorimotor tasks not linked to cerebellar function will show performance decline in older adults compared to younger adults. Q3: I hypothesise that cerebellar functional reserve compensates for structural degeneration, preserving…	I hypothesise that older adults with cerebellar degeneration will perform equally well on cerebellar-specific motor tasks as younger adults.	I hypothesise that sensorimotor tasks not linked to cerebellar function will show performance decline in older adults compared to younger adults.	I hypothesise that cerebellar functional reserve compensates for structural degeneration, preserving motor control in aging.
10.1101/2025.06.11.659200	Aging murine peritoneal macrophages undergo female-specific remodeling driven by hormone-dependent and independent mechanisms	Lu, R. J.; Chen, S.; Kim, M.; Sampathkumar, N. K.; Lee, E. H.; Christensen, A.; Wang, E. E.; Lau, I. Y.; Parihar, S.; Ravikumar, C. K.; Jung, J.; Brown, S. B.; Xu, A.; Alvarenga, J. L.; Mehalko, K.; Lee, C. D.; Goodridge, H. S.; Benayoun, B. A.	immunology	27/06/2025	2	https://www.biorxiv.org/content/10.1101/2025.06.11.659200v2	Aging is a complex process characterized by a progressive decline in physiological functions driven by both biological and environmental factors, with notable differences between sexes. Immune function is strongly influenced by biological sex, affecting both innate and adaptive immune responses, including macrophage behavior. In this study, we investigated the effects of age and sex on the immune…	[]	Q1: I hypothesise that reducing estrogen levels in aged female mice will reverse their phagocytic decline in peritoneal macrophages. Q2: I hypothesise that restoring Irf2 expression in aged female peritoneal macrophages will restore their metabolic profile to that of young female macrophages. Q3: I hypothesise that aged male peritoneal macrophages will exhibit distinct transcriptomic and epigenom…	I hypothesise that reducing estrogen levels in aged female mice will reverse their phagocytic decline in peritoneal macrophages.	I hypothesise that restoring Irf2 expression in aged female peritoneal macrophages will restore their metabolic profile to that of young female macrophages.	I hypothesise that aged male peritoneal macrophages will exhibit distinct transcriptomic and epigenomic remodeling compared to aged female peritoneal macrophages.
10.1101/2025.06.10.657597	Napping alters Functional Brain Responses in the Aged	Reyt, M.; Dourte, M.; DeHaan, S.; Deantoni, M.; Baillet, M.; Lesoinne, A.; Laloux, S.; Hammad, G.; Collette, F.; Peigneux, P.; Muto, V.; Vandewalle, G.; Bahri, M. A.; Phillips, C.; Schmidt, C.	neuroscience	17/06/2025	2	https://www.biorxiv.org/content/10.1101/2025.06.10.657597v2	Circadian rhythms shape the temporal organization of sleep and wakefulness and evolve throughout the adult lifespan, leading to higher sleep-wake cycle fragmentation with ageing. The increasing prevalence of daytime napping represents a visible manifestation of such fragmentation and has been suggested to forecast age-related cognitive decline. Here, we assessed the impact of napping on functiona…	["I hypothesise that napping in older adults is associated with reduced DLPFC hemispheric asymmetry during a working memory task.", "I hypothesise that napping in older adults is associated with decreased working memory performance at high load levels.", "I hypothesise that increased ipsilateral DLPFC activation is associated with better working memory performance only in non-napping older adults…	Q1: I hypothesise that napping in older adults is associated with reduced DLPFC hemispheric asymmetry during a working memory task. Q2: I hypothesise that napping in older adults is associated with decreased working memory performance at high load levels. Q3: I hypothesise that increased ipsilateral DLPFC activation is associated with better working memory performance only in non-napping older ad…	I hypothesise that napping in older adults is associated with reduced DLPFC hemispheric asymmetry during a working memory task.	I hypothesise that napping in older adults is associated with decreased working memory performance at high load levels.	I hypothesise that increased ipsilateral DLPFC activation is associated with better working memory performance only in non-napping older adults.
10.1101/2025.06.07.658373	Brain FGF2 and NCAM1 contribute to FGFR1-dependent progression of ER+ breast cancer brain metastases in young and aged hosts	Fox, M. S.; Jaramillo-Gomez, J. A.; Marquez-Ortiz, R. A.; Alvarez-Eraso, K. L. F.; Contreras Zarate, M. J.; Koliavas, S.; Kabos, P.; Serkova, N. J.; Sartorius, C. A.; Wellberg, E. A.; Cittelly, D. M.	cancer biology	16/06/2025	2	https://www.biorxiv.org/content/10.1101/2025.06.07.658373v2	Estrogen receptor positive (ER+) breast cancer (BC) represents a significant proportion of BC brain metastasis (BCBM) but remains understudied. Here, we report that FGFR1-amplification, a well-established driver of ER+ BC endocrine resistance, promotes ER+ BCBM colonization in young and aged mice, through brain-dependent mechanisms. FGFR1-dependent brain colonization in young and aged mice occurs…	["I hypothesise that inhibiting FGFR1 will reduce ER+ breast cancer brain metastasis progression in young mice.", "I hypothesise that NCAM1-FGFR1 interactions contribute to ER+ breast cancer brain metastasis in aged mice.", "I hypothesise that astrocytic FGF2 paracrine signaling is reduced in aged brains, impacting ER+ BCBM."]	Q1: I hypothesise that inhibiting FGFR1 will reduce ER+ breast cancer brain metastasis progression in young mice. Q2: I hypothesise that NCAM1-FGFR1 interactions contribute to ER+ breast cancer brain metastasis in aged mice. Q3: I hypothesise that astrocytic FGF2 paracrine signaling is reduced in aged brains, impacting ER+ BCBM.	I hypothesise that inhibiting FGFR1 will reduce ER+ breast cancer brain metastasis progression in young mice.	I hypothesise that NCAM1-FGFR1 interactions contribute to ER+ breast cancer brain metastasis in aged mice.	I hypothesise that astrocytic FGF2 paracrine signaling is reduced in aged brains, impacting ER+ BCBM.
10.1101/2025.05.27.656359	Reduced susceptibility to experimentally-induced complex visual hallucinations with age	Shenyan, O.; Haye, L.; Milne, G. A.; Lisi, M.; Greenwood, J. A.; Skipper, J. I.; Dekker, T. M.	neuroscience	2025-12-06	2	https://www.biorxiv.org/content/10.1101/2025.05.27.656359v2	Visual hallucinations occur across many clinical conditions, but can also be induced experimentally in healthy individuals, using high-frequency flicker (Ganzflicker) and sensory deprivation (Ganzfeld). It is unclear how hallucinatory proneness changes across the lifespan, with prior questionnaire-based studies showing mixed results. As factors such as multi-sensory acuity loss and relatively inc…	["I hypothesise that older adults report fewer complex visual hallucinations than younger adults under experimental conditions.", "I hypothesise that age-related declines in visual acuity do not mediate the reduced proneness to complex visual hallucinations in older adults.", "I hypothesise that experiencing complex visual hallucinations in older adults is associated with underlying pathology."]	Q1: I hypothesise that older adults report fewer complex visual hallucinations than younger adults under experimental conditions. Q2: I hypothesise that age-related declines in visual acuity do not mediate the reduced proneness to complex visual hallucinations in older adults. Q3: I hypothesise that experiencing complex visual hallucinations in older adults is associated with underlying pathology.	I hypothesise that older adults report fewer complex visual hallucinations than younger adults under experimental conditions.	I hypothesise that age-related declines in visual acuity do not mediate the reduced proneness to complex visual hallucinations in older adults.	I hypothesise that experiencing complex visual hallucinations in older adults is associated with underlying pathology.
10.1101/2025.05.26.655710	Distinguishing Lifelong Individual Differences from Divergent Aging Trajectories of Adult Brain Volumes	Grodem, E. O. S.; Vidal-Pineiro, D.; Sorensen, O.; Bartres-Faz, D.; Brandmaier, A. M.; Cattaneo, G.; Garrido, P. F.; Henson, R. N.; KuÃƒÅ’Ã‹â€ hn, S.; Lindenberger, U.; MacIntosh, B. J.; Nyberg, L.; Pascual-Leone, A.; Smith, S. M.; Sole-Padulles, C.; Solana-Sanchez, J.; Watne, L. O.; Walhovd, K. B.; Bjornerud, A.; Fjell, A. M.	neuroscience	13/08/2025	2	https://www.biorxiv.org/content/10.1101/2025.05.26.655710v2	Differences in the volumes of brain structures between individuals are often linked to various conditions, including Alzheimers disease, schizophrenia, and overall brain health. However, it remains unclear to what extent these differences reflect individual levels present at young adulthood or diverging aging trajectories at later ages. In this study, we analyze the aging dynamics of the volume o…	["I hypothesise that stable individual differences in brain structure volumes before age 60 are primarily determined by early adulthood levels, not aging trajectories.", "I hypothesise that ventricular volume differences in adults are driven by systematic changes from early adulthood, unlike other brain structures.", "I hypothesise that brain-age models are insufficiently sensitive to detect indi…	Q1: I hypothesise that stable individual differences in brain structure volumes before age 60 are primarily determined by early adulthood levels, not aging trajectories. Q2: I hypothesise that ventricular volume differences in adults are driven by systematic changes from early adulthood, unlike other brain structures. Q3: I hypothesise that brain-age models are insufficiently sensitive to detect …	I hypothesise that stable individual differences in brain structure volumes before age 60 are primarily determined by early adulthood levels, not aging trajectories.	I hypothesise that ventricular volume differences in adults are driven by systematic changes from early adulthood, unlike other brain structures.	I hypothesise that brain-age models are insufficiently sensitive to detect individual differences in aging trajectories before age 60.
10.1101/2025.05.22.655607	Age-dependent gut microbiota dynamics and their association with male fitness traits in Drosophila melanogaster	Sultanova, Z.; DoÃƒÅ’Ã‹â€ nertas, H. M.; Hita, A.; Aguilar, P.; Dag, B.; Lucas-Lledo, J. I.; Latorre, A.; Carazo, P.	microbiology	13/06/2025	2	https://www.biorxiv.org/content/10.1101/2025.05.22.655607v2	Growing evidence suggests that the gut microbiota plays a key role in shaping life history in a wide range of species, including well-studied model organisms like Drosophila melanogaster. Although recent studies have explored the relationship between gut microbiota and female life history, the link between gut microbiota and male life history remains understudied. In this study, we explored the r…	["I hypothesise that increased abundance of Acetobacter ascendens in young male Drosophila melanogaster is associated with accelerated physiological aging.", "I hypothesise that increased abundance of Acetobacter indonesiensis in young male Drosophila melanogaster is associated with earlier reproductive senescence.", "I hypothesise that increased abundance of Acetobacter pasteurianus in old male …	Q1: I hypothesise that increased abundance of Acetobacter ascendens in young male Drosophila melanogaster is associated with accelerated physiological aging. Q2: I hypothesise that increased abundance of Acetobacter indonesiensis in young male Drosophila melanogaster is associated with earlier reproductive senescence. Q3: I hypothesise that increased abundance of Acetobacter pasteurianus in old m…	I hypothesise that increased abundance of Acetobacter ascendens in young male Drosophila melanogaster is associated with accelerated physiological aging.	I hypothesise that increased abundance of Acetobacter indonesiensis in young male Drosophila melanogaster is associated with earlier reproductive senescence.	I hypothesise that increased abundance of Acetobacter pasteurianus in old male Drosophila melanogaster is associated with reduced lifespan.
10.1101/2025.05.19.654996	Disturbed engram network caused by NPTXs downregulation underlies aging-related memory deficits	Jin, T.; Yang, Y.; Guo, Y.; Zhang, Y.; Le, Q.; Huang, N.; Liu, X.; Yu, J.; Ma, L.; Wang, F.	neuroscience	30/06/2025	2	https://www.biorxiv.org/content/10.1101/2025.05.19.654996v2	Engram cells storing specific memories are allocated to separate neuronal ensembles, which preferentially recruit either excitatory or inhibitory inputs to drive precise memory expression. However, how these formed neuronal ensembles maintain their stability, and whether the disturbed stability contributes to aging-related memory deficits remain elusive. Here, we show that neuronal pentraxin1 (NP…	["I hypothesise that NPTX1 downregulation in aged mice causes memory deficits by increasing Fos+ ensemble hyperexcitability.", "I hypothesise that NPTX2 downregulation in aged mice causes memory deficits by reducing perisomatic inhibition of Npas4+ ensembles.", "I hypothesise that restoring NPTX1 or NPTX2 expression in aged mice will improve memory precision."]	Q1: I hypothesise that NPTX1 downregulation in aged mice causes memory deficits by increasing Fos+ ensemble hyperexcitability. Q2: I hypothesise that NPTX2 downregulation in aged mice causes memory deficits by reducing perisomatic inhibition of Npas4+ ensembles. Q3: I hypothesise that restoring NPTX1 or NPTX2 expression in aged mice will improve memory precision.	I hypothesise that NPTX1 downregulation in aged mice causes memory deficits by increasing Fos+ ensemble hyperexcitability.	I hypothesise that NPTX2 downregulation in aged mice causes memory deficits by reducing perisomatic inhibition of Npas4+ ensembles.	I hypothesise that restoring NPTX1 or NPTX2 expression in aged mice will improve memory precision.
10.1101/2025.05.20.655226	Youth-associated protein TIMP2 alters microglial state and function in the context of aging	Hemmer, B. M.; Ferreira, A. C.; Philippi, S. M.; Petridis, S. F.; Phan, A.; Castellano, J. M.	neuroscience	2025-09-06	2	https://www.biorxiv.org/content/10.1101/2025.05.20.655226v2	There is little understanding of how aging serves as the strongest risk factor for several neurogenerative diseases. Specific neural cell types, such as microglia, undergo age-related maladaptive changes, including increased inflammation, impaired debris clearance, and cellular senescence, yet specific mediators that regulate these processes remain unclear. The aged brain is rejuvenated by youth-…	[]	Q1: I hypothesise that TIMP2 deficiency exacerbates age-related microglial inflammation and impairs debris clearance in the aged brain. Q2: I hypothesise that exogenous TIMP2 administration reverses age-associated pro-inflammatory microglial phenotypes and enhances phagocytosis in aged mice. Q3: I hypothesise that TIMP2 directly reduces cellular senescence markers in aged microglia.	I hypothesise that TIMP2 deficiency exacerbates age-related microglial inflammation and impairs debris clearance in the aged brain.	I hypothesise that exogenous TIMP2 administration reverses age-associated pro-inflammatory microglial phenotypes and enhances phagocytosis in aged mice.	I hypothesise that TIMP2 directly reduces cellular senescence markers in aged microglia.
10.1101/2025.05.19.654918	Dysregulation of alternative splicing patterns in the ovaries of reproductively aged mice	Brachova, P.; Alvarez, N. S.	cell biology	23/05/2025	2	https://www.biorxiv.org/content/10.1101/2025.05.19.654918v2	Female reproductive aging is characterized by progressive deterioration of ovarian function, yet the molecular mechanisms driving these changes remain incompletely understood. Here, we used long-read direct RNA-sequencing to map transcript isoform changes in mouse ovaries across reproductive age. Comparing young and aged mice after controlled gonadotropin stimulation, we identified widespread alt…	["I hypothesise that increased exon skipping in Ndufs4 in aged mouse ovaries impairs mitochondrial Complex I function.", "I hypothesise that increased intron retention in aged mouse ovaries leads to premature stop codons in mitochondrial genes.", "I hypothesise that altered transcript boundaries in aged mouse ovaries increase isoform diversity, impacting ovarian longevity."]	Q1: I hypothesise that increased exon skipping in Ndufs4 in aged mouse ovaries impairs mitochondrial Complex I function. Q2: I hypothesise that increased intron retention in aged mouse ovaries leads to premature stop codons in mitochondrial genes. Q3: I hypothesise that altered transcript boundaries in aged mouse ovaries increase isoform diversity, impacting ovarian longevity.	I hypothesise that increased exon skipping in Ndufs4 in aged mouse ovaries impairs mitochondrial Complex I function.	I hypothesise that increased intron retention in aged mouse ovaries leads to premature stop codons in mitochondrial genes.	I hypothesise that altered transcript boundaries in aged mouse ovaries increase isoform diversity, impacting ovarian longevity.
10.1101/2025.01.14.633043	Altered Relaxation and Mitochondria-Endoplasmic Reticulum Contact Sites Precede Major (Mal)adaptations in Aging Skeletal Muscle and are Prevented by Exercise	Allen, R. J.; Kronemberger, A.; Shi, Q.; Pope, M.; Cuadra-Munoz, E.; Son, W.; Song, L.-S.; Anderson, E. J.; Pereira, R. O.; Lira, V. A.	physiology	2025-05-02	2	https://www.biorxiv.org/content/10.1101/2025.01.14.633043v2	Sarcopenia, or age-related muscle dysfunction, contributes to morbidity and mortality. Besides decreases in muscle force, sarcopenia is associated with atrophy and fast-to-slow fiber type switching, which is typically secondary to denervation in humans and rodents. However, very little is known about cellular changes preceding these important (mal)adaptations. To this matter, mitochondria and the…	["I hypothesise that altered MERC ultrastructure precedes sarcopenia onset in aging skeletal muscle.", "I hypothesise that specific MAM proteins are early biomarkers of age-related muscle dysfunction.", "I hypothesise that exercise preserves MERC ultrastructure and delays sarcopenia by maintaining muscle relaxation rate."]	Q1: I hypothesise that altered MERC ultrastructure precedes sarcopenia onset in aging skeletal muscle. Q2: I hypothesise that specific MAM proteins are early biomarkers of age-related muscle dysfunction. Q3: I hypothesise that exercise preserves MERC ultrastructure and delays sarcopenia by maintaining muscle relaxation rate.	I hypothesise that altered MERC ultrastructure precedes sarcopenia onset in aging skeletal muscle.	I hypothesise that specific MAM proteins are early biomarkers of age-related muscle dysfunction.	I hypothesise that exercise preserves MERC ultrastructure and delays sarcopenia by maintaining muscle relaxation rate.
10.1101/2025.01.10.632413	Bypassing cisplatin resistance in Nrf2 hyperactivated head and neck cancer through effective PI3Kinase targeting	Yadollahi, P.; McCord, K. A.; Li, Y.; Dayoub, H.; Saab, K.; Essien, F. N.; Hyslop, S.; Kan, E.; Ahmed, M. K.; Kirby, P. R.; Putluri, V.; Ambati, C.; Kami Reddy, R. K.; Castro, P. D.; Skinner, H. D.; Coarfa, C.; Decker, W. K.; Osman, A. A.; Patel, R. U.; Myers, J. N.; Lai, S. Y.; Putluri, N.; Johnson, F. M.; Frederick, M. J.; William, H. H.; Sandulache, V. C.	cancer biology	16/01/2025	2	https://www.biorxiv.org/content/10.1101/2025.01.10.632413v2	BackgroundFor patients with head and neck squamous cell carcinoma (HNSCC), failure of definitive radiation combined with cisplatin nearly universally results in death. Although hyperactivation of the Nrf2 pathway can drive radiation and cisplatin resistance along with suppressed anti-tumor immunity, treatment-refractory HNSCC tumors may retain sensitivity to targeted agents secondary to synergist…	[]	Q1: I hypothesise that PI3K inhibition with gedatolisib will re-sensitize cisplatin-resistant HNSCC cells to cisplatin by inducing senescence. Q2: I hypothesise that gedatolisib will reduce HNSCC tumor growth in vivo by disrupting fatty acid metabolism. Q3: I hypothesise that gedatolisib will decrease regulatory T lymphocyte infiltration in HNSCC tumors, enhancing anti-tumor immunity.	I hypothesise that PI3K inhibition with gedatolisib will re-sensitize cisplatin-resistant HNSCC cells to cisplatin by inducing senescence.	I hypothesise that gedatolisib will reduce HNSCC tumor growth in vivo by disrupting fatty acid metabolism.	I hypothesise that gedatolisib will decrease regulatory T lymphocyte infiltration in HNSCC tumors, enhancing anti-tumor immunity.
10.1101/2025.05.14.653957	The relationship between task-related aperiodic EEG activity, neural inefficiency and verbal working memory in younger and older adults	Sghirripa, S.; Graziano, A.; Goldsworthy, M. R.	neuroscience	18/05/2025	2	https://www.biorxiv.org/content/10.1101/2025.05.14.653957v2	Working memory (WM) decline in ageing may be related to increases in "neural noise", potentially reflected in the EEG aperiodic exponent. We reanalysed previously published data to investigate age-related differences in the aperiodic exponent during verbal WM and its relationship with neural inefficiency. EEG was recorded from 24 younger (18-35 years) and 30 older adults (50-86 years) during a mo…	["I hypothesise that older adults exhibit a flatter aperiodic exponent during verbal working memory retention compared to younger adults.", "I hypothesise that a flatter aperiodic exponent during verbal working memory fixation is associated with increased neural inefficiency in older adults.", "I hypothesise that older adults flexibly modulate their aperiodic exponent during working memory retent…	Q1: I hypothesise that older adults exhibit a flatter aperiodic exponent during verbal working memory retention compared to younger adults. Q2: I hypothesise that a flatter aperiodic exponent during verbal working memory fixation is associated with increased neural inefficiency in older adults. Q3: I hypothesise that older adults flexibly modulate their aperiodic exponent during working memory re…	I hypothesise that older adults exhibit a flatter aperiodic exponent during verbal working memory retention compared to younger adults.	I hypothesise that a flatter aperiodic exponent during verbal working memory fixation is associated with increased neural inefficiency in older adults.	I hypothesise that older adults flexibly modulate their aperiodic exponent during working memory retention to maintain performance.
10.1101/2025.05.13.653906	An approach to differentiating biological from chemical sulfide oxidation on corroded concrete sewer surfaces	Huang, X.; Yin, Y.; Zuo, Z.; Shi, T.; Kuen, T.; Yuan, Z.; Zheng, M.	microbiology	15/05/2025	2	https://www.biorxiv.org/content/10.1101/2025.05.13.653906v2	Hydrogen sulfide (H2S)-induced sewer corrosion largely impacts the longevity of infrastructure worldwide. The corrosion incorporates two pathways, i.e., chemical and biological oxidation of H2S to sulfuric acid; however, their rates are difficult to differentiate on corroded sewer pipelines, limiting understanding and application of effective strategies for corrosion control. Here, this study dev…	["I hypothesise that increasing H2S concentration above 300 ppm will shift sulfide oxidation dominance from biological to chemical processes in corroded concrete.", "I hypothesise that a decrease in concrete pH will accelerate both chemical and biological sulfide oxidation rates."]	Q1: I hypothesise that increasing H2S concentration above 300 ppm will shift sulfide oxidation dominance from biological to chemical processes in corroded concrete. Q2: I hypothesise that a decrease in concrete pH will accelerate both chemical and biological sulfide oxidation rates.	I hypothesise that increasing H2S concentration above 300 ppm will shift sulfide oxidation dominance from biological to chemical processes in corroded concrete.	I hypothesise that a decrease in concrete pH will accelerate both chemical and biological sulfide oxidation rates.
10.1101/2025.05.07.652530	RNA Pol I activity is required for meiotic chromatin organization and the H3K4me3 gradient essential for oogenesis, independent of ribosome synthesis	Mejia-Trujillo, R.; Zhao, Q.; Abraham, F.; Rahman, A.; Sarinay Cenik, E.	developmental biology	2025-07-08	2	https://www.biorxiv.org/content/10.1101/2025.05.07.652530v2	Oogenesis requires extensive and dynamic chromatin remodeling that primes gene promoters for later transcriptional activation during embryonic development. Here, we uncover a pivotal, non-canonical role for RNA Polymerase I (Pol I) in driving these chromatin state transitions during Caenorhabditis elegans oogenesis. Using the auxin-inducible degron system to selectively deplete either Pol I catal…	["I hypothesise that impaired RNA Pol I activity in aging oocytes leads to reduced fertility due to disrupted H3K4me3 gradients.", "I hypothesise that nucleolar stress, independent of ribosome synthesis, compromises oocyte maturation by altering chromatin organization.", "I hypothesise that elevated ATM/ATR phosphorylation in oocytes due to Pol I depletion is a marker of impaired oogenesis."]	Q1: I hypothesise that impaired RNA Pol I activity in aging oocytes leads to reduced fertility due to disrupted H3K4me3 gradients. Q2: I hypothesise that nucleolar stress, independent of ribosome synthesis, compromises oocyte maturation by altering chromatin organization. Q3: I hypothesise that elevated ATM/ATR phosphorylation in oocytes due to Pol I depletion is a marker of impaired oogenesis.	I hypothesise that impaired RNA Pol I activity in aging oocytes leads to reduced fertility due to disrupted H3K4me3 gradients.	I hypothesise that nucleolar stress, independent of ribosome synthesis, compromises oocyte maturation by altering chromatin organization.	I hypothesise that elevated ATM/ATR phosphorylation in oocytes due to Pol I depletion is a marker of impaired oogenesis.
10.1101/2025.05.06.652460	Acute E2/P4 loss compromises the biology and function of neurogenic niches during a vulnerable female aging period	Pillutla, S. V.; Skoda, M. J.; Ishii, A.; Corenblum, M. J.; Montgomery, T.; Wene, P. V.; Menakuru, N.; Kraszewski, J. N.; Billheimer, D.; Winter, G. M.; Cowen, S. L.; Madhavan, L.	neuroscience	13/05/2025	2	https://www.biorxiv.org/content/10.1101/2025.05.06.652460v2	Effects of aging on neural stem progenitor cells (NSPCs) have been studied in males, but less is known in females. Here we comparatively assess female NSPC biology, both in the subventricular zone and hippocampal dentate gyrus niches, across different ages of F344 rats (2, 6, 9 and 14 months). The rats were ovariectomized (OVX) or remained Intact at each of the aging stages, to assess the role of…	["I hypothesise that E2/P4 loss at 9 months of age in female rats significantly reduces NSPC proliferation compared to intact rats.", "I hypothesise that ovariectomy at 9 months of age in female rats impairs hippocampal-dependent memory function compared to intact rats.", "I hypothesise that reduced antioxidant expression in 9-month-old ovariectomized female rats correlates with decreased neuroge…	Q1: I hypothesise that E2/P4 loss at 9 months of age in female rats significantly reduces NSPC proliferation compared to intact rats. Q2: I hypothesise that ovariectomy at 9 months of age in female rats impairs hippocampal-dependent memory function compared to intact rats. Q3: I hypothesise that reduced antioxidant expression in 9-month-old ovariectomized female rats correlates with decreased neu…	I hypothesise that E2/P4 loss at 9 months of age in female rats significantly reduces NSPC proliferation compared to intact rats.	I hypothesise that ovariectomy at 9 months of age in female rats impairs hippocampal-dependent memory function compared to intact rats.	I hypothesise that reduced antioxidant expression in 9-month-old ovariectomized female rats correlates with decreased neurogenesis.
10.1101/2025.05.05.652255	Isoswitching drives the aging process in human brains	Erdogdu, B.; Ji, H. J.; Rudnick, Z. C.; Pertea, M.; Salzberg, S.	genomics	2025-12-08	2	https://www.biorxiv.org/content/10.1101/2025.05.05.652255v2	Learning, reasoning, and working memory functions are attributed to the dorsolateral prefrontal cortex (DLPFC), a brain region that is highly evolved in primates and notably variable among individuals. Environmental and genetic factors likely contribute to this variability, but little is known about how they influence changes within an individual brain across the lifespan as different cognitive t…	["I hypothesise that increased isoswitching in DLPFC correlates with cognitive decline in aging humans.", "I hypothesise that inhibiting specific isoswitching events will slow DLPFC aging in primates.", "I hypothesise that isoswitching patterns in DLPFC can predict lifespan in humans."]	Q1: I hypothesise that increased isoswitching in DLPFC correlates with cognitive decline in aging humans. Q2: I hypothesise that inhibiting specific isoswitching events will slow DLPFC aging in primates. Q3: I hypothesise that isoswitching patterns in DLPFC can predict lifespan in humans.	I hypothesise that increased isoswitching in DLPFC correlates with cognitive decline in aging humans.	I hypothesise that inhibiting specific isoswitching events will slow DLPFC aging in primates.	I hypothesise that isoswitching patterns in DLPFC can predict lifespan in humans.
10.1101/2025.05.08.652953	White matter microstructure and macrostructure brain charts across the human lifespan	Kim, M. E.; Gao, C.; Ramadass, K.; Newlin, N. R.; Kanakaraj, P.; Bogdanov, S.; Rudravaram, G.; Archer, D.; Hohman, T. J.; Jefferson, A. L.; Morgan, V. L.; Roche, A.; Englot, D. J.; Resnick, S. M.; Beason-Held, L. L.; Cutting, L.; Barquero, L. A.; D'arcangel, M. A.; Nguyen, T. Q.; Humphreys, K. L.; Niu, Y.; Vinci-Booher, S.; Cascio, C. J.; The HABS-HD Study Team, ; Alzheimers Disease Neuroimaging …	neuroscience	2025-09-05	2	https://www.biorxiv.org/content/10.1101/2025.05.08.652953v2	Normative reference charts are widely used in healthcare, especially for assessing the development of individuals by benchmarking anatomic and physiological features against population trajectories across the lifespan. Recent work has extended this concept to gray matter morphology in the brain, but no such reference framework currently exists for white matter (WM) even though WM constitutes the …	["I hypothesise that specific white matter pathways show accelerated microstructural decline with age in individuals with neurological disorders compared to healthy controls.", "I hypothesise that deviations from normative white matter macrostructure trajectories are associated with cognitive decline in older adults.", "I hypothesise that early-life white matter maturation trajectories predict la…	Q1: I hypothesise that specific white matter pathways show accelerated microstructural decline with age in individuals with neurological disorders compared to healthy controls. Q2: I hypothesise that deviations from normative white matter macrostructure trajectories are associated with cognitive decline in older adults. Q3: I hypothesise that early-life white matter maturation trajectories predic…	I hypothesise that specific white matter pathways show accelerated microstructural decline with age in individuals with neurological disorders compared to healthy controls.	I hypothesise that deviations from normative white matter macrostructure trajectories are associated with cognitive decline in older adults.	I hypothesise that early-life white matter maturation trajectories predict later-life brain health and resilience to aging-related changes.
10.1101/2025.05.01.651651	Age-related declines in niche self-renewal factors controls testis aging and spermatogonial stem cell competition through Hairless, Imp, and Chinmo	Zheng, Y.; Lee, Y.-C.; Wang, Y.-T.; Chiang, P.-K.; Chang, S.-L.; Hsu, H.-J.; Hsu, L.-S.; Bach, E.; Tseng, C.-Y.	genetics	2025-03-05	2	https://www.biorxiv.org/content/10.1101/2025.05.01.651651v2	Aging is associated with progressive tissue decline and shifts in stem cell clonality. The role of niche signals in driving these processes remains poorly understood. Using the Drosophila testis, we identify a regulatory axis in which age-related decline of niche signals (BMPs) lead to upregulation of the co-repressor Hairless, which downregulates the RNA-binding protein Imp in aged germline stem…	["I hypothesise that increasing BMP levels in the Drosophila testis niche reverses age-related GSC loss.", "I hypothesise that Hairless overexpression in Drosophila GSCs increases their competitive advantage.", "I hypothesise that Imp downregulation in Drosophila GSCs leads to ectopic Perlecan secretion."]	Q1: I hypothesise that increasing BMP levels in the Drosophila testis niche reverses age-related GSC loss. Q2: I hypothesise that Hairless overexpression in Drosophila GSCs increases their competitive advantage. Q3: I hypothesise that Imp downregulation in Drosophila GSCs leads to ectopic Perlecan secretion.	I hypothesise that increasing BMP levels in the Drosophila testis niche reverses age-related GSC loss.	I hypothesise that Hairless overexpression in Drosophila GSCs increases their competitive advantage.	I hypothesise that Imp downregulation in Drosophila GSCs leads to ectopic Perlecan secretion.
10.1101/2025.04.24.650484	Fluphenazine, an antipsychotic compound, ameliorates Alzheimer's disease by clearing amyloid beta accumulation in C. elegans	Devare, M. N.; Le, V.; Chung, V.; Vu, T.; Kaeberlein, M.	molecular biology	29/04/2025	2	https://www.biorxiv.org/content/10.1101/2025.04.24.650484v2	The ageing population worldwide faces an increasing burden of age-related conditions, with Alzheimers disease being a prominent neurodegenerative concern. Drug repurposing, the practice of identifying new therapeutic applications for existing drugs, offers a promising avenue for accelerated intervention. In this study, we utilized the yeast S. cerevisiae to screen a library of 1,760 FDA-approved …	["I hypothesise fluphenazine reduces amyloid-beta accumulation in aged C. elegans.", "I hypothesise fluphenazine ameliorates Alzheimer's disease pathology in aged C. elegans."]	Q1: I hypothesise fluphenazine reduces amyloid-beta accumulation in aged C. elegans. Q2: I hypothesise fluphenazine ameliorates Alzheimer's disease pathology in aged C. elegans.	I hypothesise fluphenazine reduces amyloid-beta accumulation in aged C. elegans.	I hypothesise fluphenazine ameliorates Alzheimer's disease pathology in aged C. elegans.
10.1101/2025.04.21.649585	Single-Cell Epigenomics Uncovers Heterochromatin Instability and Transcription Factor Dysfunction during Mouse Brain Aging	Amaral, M. L.; Mamde, S.; Miller, M.; Hou, X.; Arzavala, J.; Osteen, J.; Walker Smoot, E.; Yang, Q.; Eisner, E.; Zeng, Q.; Baez-Becerra, C. T.; Olness, J.; Kern, J. C.; Rink, J.; Johnson, N.; Barcoma, A.; Cho, S.; Cao, S.; Emerson, N.; Lee, J.; Willier, J.; Loe, T.; Jiao, H.; Zu, S.; Zhu, Q.; Preissl, S.; Wang, A.; Ecker, J.; Behrens, M. M.; Ren, B.	genomics	20/05/2025	2	https://www.biorxiv.org/content/10.1101/2025.04.21.649585v2	The mechanisms regulating transcriptional changes in brain aging remain poorly understood. Here, we use single-cell epigenomics to profile chromatin accessibility and gene expression across eight brain regions in the mouse brain at 2, 9, and 18 months of age. In addition to a significant decline in progenitor cell populations involved in neurogenesis and myelination, we observed widespread and co…	[]	Q1: I hypothesise that increased H3K9me3 domain accessibility in glutamatergic neurons directly correlates with AP-1 transcription factor activity in aged mice. Q2: I hypothesise that reduced progenitor cell populations in aged mouse brains are caused by the dysregulation of specific developmental transcription factors. Q3: I hypothesise that heterochromatin decay in aged mouse brains leads to th…	I hypothesise that increased H3K9me3 domain accessibility in glutamatergic neurons directly correlates with AP-1 transcription factor activity in aged mice.	I hypothesise that reduced progenitor cell populations in aged mouse brains are caused by the dysregulation of specific developmental transcription factors.	I hypothesise that heterochromatin decay in aged mouse brains leads to the upregulation of long non-coding RNAs in glutamatergic neurons.
10.1101/2025.04.15.648983	A non-invasive method for profiling the gut microbiome and virome of honey bee queens	Holmes, L. A.; Wolf Veiga, P.; Pettis, J.; Guarna, M. M.; Hoover, S. E.	microbiology	16/04/2025	2	https://www.biorxiv.org/content/10.1101/2025.04.15.648983v2	High honey bee colony mortality worldwide has underscored the critical role of queen bee health in colony survival, with poor queen quality frequently linked to colony losses. The gut microbiome plays fundamental roles in immunity, nutrition, and reproduction, making its characterization essential for understanding stressors that impact queen health, longevity, and fecundity, yet its role in medi…	["I hypothesise that a dysbiotic gut microbiome in queen honey bees is associated with reduced longevity.", "I hypothesise that specific viral infections in queen honey bees negatively impact their reproductive capacity.", "I hypothesise that non-invasive fecal profiling can predict queen honey bee health status."]	Q1: I hypothesise that a dysbiotic gut microbiome in queen honey bees is associated with reduced longevity. Q2: I hypothesise that specific viral infections in queen honey bees negatively impact their reproductive capacity. Q3: I hypothesise that non-invasive fecal profiling can predict queen honey bee health status.	I hypothesise that a dysbiotic gut microbiome in queen honey bees is associated with reduced longevity.	I hypothesise that specific viral infections in queen honey bees negatively impact their reproductive capacity.	I hypothesise that non-invasive fecal profiling can predict queen honey bee health status.
10.1101/2025.04.09.647991	The mitochondrial NAD transporter SLC25A51 is a modulator of beta cell senescence and type 2 diabetes	Kong, B.; L'Yi, S.; Ramirez-Hernandez, E. G.; Hong, S.; Weidenspointner, R.; Song, S.; Caserta, C.; Cho, Y. M.; Kory, N.	cell biology	2025-11-04	2	https://www.biorxiv.org/content/10.1101/2025.04.09.647991v2	AbstractNicotinamide adenine dinucleotide (NAD+) is an essential redox cofactor and signaling molecule linked to age-dependent metabolic decline, with its compartmentalization regulated by the mitochondrial carrier SLC25A51. The mechanisms contributing to declining NAD+ levels during aging and the consequences of altered NAD+ homeostasis across tissues are poorly understood. Here, we show that SL…	["I hypothesise that SLC25A51 overexpression induces beta cell senescence by reducing the NAD+/NADH ratio.", "I hypothesise that deleting SLC25A51 in beta cells prevents senescence and improves glucose homeostasis in mice.", "I hypothesise that NRF2 directly regulates SLC25A51 expression in senescent cells."]	Q1: I hypothesise that SLC25A51 overexpression induces beta cell senescence by reducing the NAD+/NADH ratio. Q2: I hypothesise that deleting SLC25A51 in beta cells prevents senescence and improves glucose homeostasis in mice. Q3: I hypothesise that NRF2 directly regulates SLC25A51 expression in senescent cells.	I hypothesise that SLC25A51 overexpression induces beta cell senescence by reducing the NAD+/NADH ratio.	I hypothesise that deleting SLC25A51 in beta cells prevents senescence and improves glucose homeostasis in mice.	I hypothesise that NRF2 directly regulates SLC25A51 expression in senescent cells.
10.1101/2025.04.09.648006	Long-Distance Trail Running Induces Inflammatory-Associated Protein, Lipid, and Purine Oxidation in Red Blood Cells	Nemkov, T.; Stauffer, E.; Cendali, F.; Stephenson, D.; Nader, E.; Robert, M.; Skinner, S.; Dzieciatkowska, M.; Hansen, K. C.; Robach, P.; Millet, G. Y.; Connes, P.; D'Alessandro, A.	biochemistry	19/05/2025	2	https://www.biorxiv.org/content/10.1101/2025.04.09.648006v2	Ultra-endurance exercise places extreme physiological demands on oxygen transport, yet its impact on red blood cells (RBCs) remains underexplored. We conducted a multi-omics analysis of plasma and RBCs from endurance athletes before and after a 40-km trail race (MCC) and a 171-km ultramarathon (UTMB(R)). Ultra-running led to oxidative stress, metabolic shifts, and inflammation-driven RBC damage, …	["I hypothesise that increased phosphatidylserine externalization in red blood cells after ultramarathon running is directly caused by inflammation-associated protein oxidation.", "I hypothesise that elevated kynurenine levels in red blood cells after ultramarathon running correlate with reduced red blood cell deformability.", "I hypothesise that systemic inflammation, measured by IL-6, drives li…	Q1: I hypothesise that increased phosphatidylserine externalization in red blood cells after ultramarathon running is directly caused by inflammation-associated protein oxidation. Q2: I hypothesise that elevated kynurenine levels in red blood cells after ultramarathon running correlate with reduced red blood cell deformability. Q3: I hypothesise that systemic inflammation, measured by IL-6, drive…	I hypothesise that increased phosphatidylserine externalization in red blood cells after ultramarathon running is directly caused by inflammation-associated protein oxidation.	I hypothesise that elevated kynurenine levels in red blood cells after ultramarathon running correlate with reduced red blood cell deformability.	I hypothesise that systemic inflammation, measured by IL-6, drives lipid oxidation in red blood cells during ultra-endurance exercise.
10.1101/2025.04.03.647069	Relaxin signaling is critical for virgin female reproductive physiology in Drosophila	Volonte, Y.; Heredia, F.; Zanini, R.; Menezes, J.; Perez, M. S.; Gualdino, M.; Lage, L.; Cruz, L. d. S.; Casimiro, A. P.; Garelli, A.; Gontijo, A. M.	physiology	13/04/2025	2	https://www.biorxiv.org/content/10.1101/2025.04.03.647069v2	Ovulation allows mature oocytes to exit the ovary for potential fertilization. In Drosophila, ovulation can be induced by mating or occur spontaneously in lower amounts in virgin females. Virgin ovulation rates show high populational variation, with short oocyte retention times being ancestral, and long retention being selected for in colder climates. The molecular mechanisms controlling virgin o…	[]	Q1: I hypothesise that Dilp8 antagonizes insulin signaling to prevent oocyte overstocking in nutrient-rich conditions. Q2: I hypothesise that Dilp8 signaling promotes the elimination of aging oocytes in virgin females. Q3: I hypothesise that Lgr3 in octopaminergic neurons mediates Dilp8's effect on virgin ovulation rate.	I hypothesise that Dilp8 antagonizes insulin signaling to prevent oocyte overstocking in nutrient-rich conditions.	I hypothesise that Dilp8 signaling promotes the elimination of aging oocytes in virgin females.	I hypothesise that Lgr3 in octopaminergic neurons mediates Dilp8's effect on virgin ovulation rate.
10.1101/2025.04.02.646724	H3K27 and H3K9 Methylation Mask Potential CTCF Binding Sites to Maintain 3D Genome Integrity	Fukuda, K.; Shinkai, Y.; Shimura, C.	molecular biology	2025-03-04	2	https://www.biorxiv.org/content/10.1101/2025.04.02.646724v2	The three-dimensional (3D) genome structure is essential for gene regulation and various genomic functions. CTCF plays a key role in organizing Topologically Associated Domains (TADs) and promoter-enhancer loops, contributing to proper cell differentiation and development. Although CTCF binds the genome with high sequence specificity, its binding sites are dynamically regulated during development…	["I hypothesise that H3K27 methylation prevents aberrant CTCF binding in aging cells.", "I hypothesise that increased H3K9 and H3K27 methylation correlates with reduced CTCF binding site accessibility in aged tissues.", "I hypothesise that inhibiting H3K27 methylation in aged cells restores CTCF binding and improves 3D genome integrity."]	Q1: I hypothesise that H3K27 methylation prevents aberrant CTCF binding in aging cells. Q2: I hypothesise that increased H3K9 and H3K27 methylation correlates with reduced CTCF binding site accessibility in aged tissues. Q3: I hypothesise that inhibiting H3K27 methylation in aged cells restores CTCF binding and improves 3D genome integrity.	I hypothesise that H3K27 methylation prevents aberrant CTCF binding in aging cells.	I hypothesise that increased H3K9 and H3K27 methylation correlates with reduced CTCF binding site accessibility in aged tissues.	I hypothesise that inhibiting H3K27 methylation in aged cells restores CTCF binding and improves 3D genome integrity.
10.1101/2025.03.30.646231	Dark-induced decrease in ascorbate levels in Arabidopsis leaves occurs independently of ascorbate peroxidase and oxidase, recycling enzymes, and senescence signaling	Hamada, T.; Yamamoto, K.; Hamada, A.; Maruta, T.	plant biology	27/05/2025	2	https://www.biorxiv.org/content/10.1101/2025.03.30.646231v2	Ascorbate is a key antioxidant that protects plant cells from oxidative damage. While plants actively synthesize ascorbate during the day, its degradation becomes prominent under prolonged dark conditions. Since ascorbate degradation begins with its oxidized form, dehydroascorbate (DHA), this process inherently requires ascorbate oxidation. However, the molecular mechanisms underlying dark-induce…	["I hypothesise that a novel, unidentified enzyme directly oxidises ascorbate in Arabidopsis leaves during prolonged dark conditions.", "I hypothesise that dark-induced ascorbate decrease in Arabidopsis is regulated by a non-enzymatic chemical reaction independent of known pathways."]	Q1: I hypothesise that a novel, unidentified enzyme directly oxidises ascorbate in Arabidopsis leaves during prolonged dark conditions. Q2: I hypothesise that dark-induced ascorbate decrease in Arabidopsis is regulated by a non-enzymatic chemical reaction independent of known pathways.	I hypothesise that a novel, unidentified enzyme directly oxidises ascorbate in Arabidopsis leaves during prolonged dark conditions.	I hypothesise that dark-induced ascorbate decrease in Arabidopsis is regulated by a non-enzymatic chemical reaction independent of known pathways.
10.1101/2025.03.26.645519	Normal aging increases white matter microglial reaction and perivascular macrophages in the microcebe primate	Dupuis, L.; Garcia, L.; Petit, F.; Lam, S.; Hirbec, H. E.; Picq, J.-L.; Boche, D.; Dhenain, M.	neuroscience	30/07/2025	2	https://www.biorxiv.org/content/10.1101/2025.03.26.645519v2	As populations age, the incidence of neurodegenerative disorders is rising. Early age-related neuropathological changes are the breeding ground for the development of these disorders. Microglia are the resident macrophages of the central nervous system. They play crucial roles in maintaining brain homeostasis, yet their age-related changes remain not fully understood. While age-related microglia …	[]	Q1: I hypothesise that increased HLA-DR expression in white matter microglia is a driver of age-related white matter dysfunction in primates. Q2: I hypothesise that elevated perivascular macrophages in aged primates contribute to impaired brain waste clearance. Q3: I hypothesise that targeting white matter microglia can mitigate age-related cognitive decline in primate models.	I hypothesise that increased HLA-DR expression in white matter microglia is a driver of age-related white matter dysfunction in primates.	I hypothesise that elevated perivascular macrophages in aged primates contribute to impaired brain waste clearance.	I hypothesise that targeting white matter microglia can mitigate age-related cognitive decline in primate models.
10.1101/2025.03.28.645952	Temporal and Spatial Scales of Human Resting-state Cortical Activity Across the Lifespan	Bero, J.; Humphries, C.; Li, Y.; Kumar, A.; Lee, H.; Shinn, M.; Murray, J. D.; Vickery, T.; Lee, D.	neuroscience	29/07/2025	2	https://www.biorxiv.org/content/10.1101/2025.03.28.645952v2	Sensorimotor and cognitive abilities undergo substantial changes throughout the human lifespan, but the corresponding changes in the functional properties of cortical networks remain poorly understood. This can be studied using temporal and spatial scales of functional magnetic resonance imaging (fMRI) signals, which provide a robust description of the topological structure and temporal dynamics …	["I hypothesise that decreasing temporal and spatial scales of resting-state cortical activity with age are causally linked to reduced sensorimotor and cognitive abilities.", "I hypothesise that increased cortical myelination in aging individuals directly causes the observed decrease in temporal and spatial scales of fMRI signals.", "I hypothesise that prefrontal cortex temporal and spatial scale…	Q1: I hypothesise that decreasing temporal and spatial scales of resting-state cortical activity with age are causally linked to reduced sensorimotor and cognitive abilities. Q2: I hypothesise that increased cortical myelination in aging individuals directly causes the observed decrease in temporal and spatial scales of fMRI signals. Q3: I hypothesise that prefrontal cortex temporal and spatial s…	I hypothesise that decreasing temporal and spatial scales of resting-state cortical activity with age are causally linked to reduced sensorimotor and cognitive abilities.	I hypothesise that increased cortical myelination in aging individuals directly causes the observed decrease in temporal and spatial scales of fMRI signals.	I hypothesise that prefrontal cortex temporal and spatial scales peaking in adolescence reflect a critical developmental window for cognitive function maturation.
10.1101/2025.03.26.645567	Signaling scaffold Shoc2 regulates lymphangiogenesis by suppressing mTORC1-mediated IFN responses.	Wilson, P.; Vishwakarma, V.; Norcross, R.; Khaire, K. S.; Pham, V. N.; Jung, H. M.; Weinstein, B. M.; Galperin, E.	developmental biology	28/04/2025	2	https://www.biorxiv.org/content/10.1101/2025.03.26.645567v2	An interplay of growth factors and signaling pathways governs the development and maintenance of the lymphatic vasculature, ensuring proper fluid homeostasis and immune function. Disruption of these regulatory mechanisms can lead to congenital lymphatic disorders and contribute to various pathological conditions. However, the mechanisms underlying the molecular regulation of these processes remai…	["I hypothesise that Shoc2 deficiency accelerates cellular senescence in lymphatic endothelial cells by increasing mTORC1 signaling.", "I hypothesise that inhibiting mTORC1 signaling in Shoc2-deficient lymphatic endothelial cells will restore mitochondrial respiration.", "I hypothesise that Shoc2 loss-of-function variants induce premature cellular senescence in lymphatic endothelial cells."]	Q1: I hypothesise that Shoc2 deficiency accelerates cellular senescence in lymphatic endothelial cells by increasing mTORC1 signaling. Q2: I hypothesise that inhibiting mTORC1 signaling in Shoc2-deficient lymphatic endothelial cells will restore mitochondrial respiration. Q3: I hypothesise that Shoc2 loss-of-function variants induce premature cellular senescence in lymphatic endothelial cells.	I hypothesise that Shoc2 deficiency accelerates cellular senescence in lymphatic endothelial cells by increasing mTORC1 signaling.	I hypothesise that inhibiting mTORC1 signaling in Shoc2-deficient lymphatic endothelial cells will restore mitochondrial respiration.	I hypothesise that Shoc2 loss-of-function variants induce premature cellular senescence in lymphatic endothelial cells.
10.1101/2025.03.27.645653	Antagonistic Regulation of LINE-1/Alu Elements and Their Repressor APOBEC3B in Cellular Senescence	Munot, D. N.; Najjar, G.; Singh, M.; guenes, C.; Sauter, D.; Arora, A.	genomics	30/03/2025	2	https://www.biorxiv.org/content/10.1101/2025.03.27.645653v2	Long Interspersed Nuclear Elements-1 (LINE-1 or L1) make up approximately 21% of the human genome, with some L1 loci containing intact open reading frames (ORFs) that facilitate retrotransposition. Because retrotransposition can have deleterious effects leading to mutations and genomic instability, L1 activity is typically suppressed in somatic cells through transcriptional and post-transcription…	["I hypothesise that reduced APOBEC3B expression directly causes increased LINE-1 retrotransposition in senescent cells.", "I hypothesise that restoring APOBEC3B levels in senescent cells will decrease LINE-1 activity and associated inflammation.", "I hypothesise that APOBEC3B depletion in aging cells promotes L1-induced DNA damage."]	Q1: I hypothesise that reduced APOBEC3B expression directly causes increased LINE-1 retrotransposition in senescent cells. Q2: I hypothesise that restoring APOBEC3B levels in senescent cells will decrease LINE-1 activity and associated inflammation. Q3: I hypothesise that APOBEC3B depletion in aging cells promotes L1-induced DNA damage.	I hypothesise that reduced APOBEC3B expression directly causes increased LINE-1 retrotransposition in senescent cells.	I hypothesise that restoring APOBEC3B levels in senescent cells will decrease LINE-1 activity and associated inflammation.	I hypothesise that APOBEC3B depletion in aging cells promotes L1-induced DNA damage.
10.1101/2025.03.28.645957	Elimination of senescent cells with senolytic host-directed therapy reduces tuberculosis progression in mice	Bishai, W.; Shee, S.; Martinez-Martinez, Y. B.; Koleske, B.; Yabaji, S. M.; Kobzik, L.; Kramnik, I.	microbiology	2025-03-07	2	https://www.biorxiv.org/content/10.1101/2025.03.28.645957v2	By eliciting lung necrosis, which enhances aerosol transmission, Mycobacterium tuberculosis (Mtb) sustains its long-term survival as a human pathogen. In studying the human-like necrotic granuloma lesions characteristic of Mtb-infected B6.Sst1S mice, we found that lung myeloid cells display elevated senescence markers: cell cycle arrest proteins p21 and p16, the DNA damage marker {gamma}H2A.X, se…	["I hypothesise that Mycobacterium tuberculosis infection induces lung myeloid cells to enter a senescent state.", "I hypothesise that senescent lung myeloid cells promote Mycobacterium tuberculosis disease progression.", "I hypothesise that senolytic drug treatment reduces Mycobacterium tuberculosis lung burden by eliminating senescent cells."]	Q1: I hypothesise that Mycobacterium tuberculosis infection induces lung myeloid cells to enter a senescent state. Q2: I hypothesise that senescent lung myeloid cells promote Mycobacterium tuberculosis disease progression. Q3: I hypothesise that senolytic drug treatment reduces Mycobacterium tuberculosis lung burden by eliminating senescent cells.	I hypothesise that Mycobacterium tuberculosis infection induces lung myeloid cells to enter a senescent state.	I hypothesise that senescent lung myeloid cells promote Mycobacterium tuberculosis disease progression.	I hypothesise that senolytic drug treatment reduces Mycobacterium tuberculosis lung burden by eliminating senescent cells.
10.1101/2025.03.25.645371	Acid-Sensing Ion Channel 1a Deficiency Drives Endocrine Hypertension in Male Mice	Garcia, S. M.; Tuineau, M. N.; DeLeon, X. A.; Detweiler, N. D.; Tamang, S.; Kanagy, N. L.; Gonzalez Bosc, L. V.; Resta, T. C.; Naik, J. S.; Jernigan, N. L.	physiology	2025-07-04	2	https://www.biorxiv.org/content/10.1101/2025.03.25.645371v2	BackgroundAcid-sensing ion channel 1a (ASIC1a) is an H+-gated cation channel that responds to extracellular acidosis in both normal and pathological states, including ischemia, inflammation, and metabolic disturbances. While ASIC1a regulates vascular reactivity, its role in blood pressure regulation remains unclear, particularly concerning sex, aging, and disease. This study aims to investigate w…	[]	Q1: I hypothesise that ASIC1a deficiency in male mice causes elevated corticosterone levels, leading to hypertension. Q2: I hypothesise that ASIC1a deficiency in female mice does not affect blood pressure or corticosterone levels. Q3: I hypothesise that ASIC1a deficiency in aged male mice leads to hyperaldosteronism and sympathetic overactivity.	I hypothesise that ASIC1a deficiency in male mice causes elevated corticosterone levels, leading to hypertension.	I hypothesise that ASIC1a deficiency in female mice does not affect blood pressure or corticosterone levels.	I hypothesise that ASIC1a deficiency in aged male mice leads to hyperaldosteronism and sympathetic overactivity.
10.1101/2025.01.21.634044	Characterising ongoing brain aging and baseline effects from cross-sectional data	Smith, S. M.; Miller, K. L.; Nichols, T. E.	neuroscience	18/04/2025	2	https://www.biorxiv.org/content/10.1101/2025.01.21.634044v2	"Brain age delta" is the difference between age estimated from brain imaging data and actual age. Positive delta in adults is normally interpreted as implying that an individual is aging (or has aged) faster than the population norm, an indicator of unhealthy aging. Unfortunately, from cross-sectional (single timepoint) imaging data, it is impossible to know whether a single individuals positive …	[]	Q1: I hypothesise that a higher proportion of positive brain age delta in cross-sectional data is attributable to baseline effects rather than ongoing accelerated aging. Q2: I hypothesise that distinct modes of brain aging identified in cross-sectional data correlate with longitudinal measures of aging rate. Q3: I hypothesise that improved data processing in cross-sectional brain aging studies in…	I hypothesise that a higher proportion of positive brain age delta in cross-sectional data is attributable to baseline effects rather than ongoing accelerated aging.	I hypothesise that distinct modes of brain aging identified in cross-sectional data correlate with longitudinal measures of aging rate.	I hypothesise that improved data processing in cross-sectional brain aging studies increases consistency with longitudinal aging findings.
10.1101/2025.03.21.644463	Enhanced Functional Potential of Pseudogene-associated lncRNA Genes in Mammals	Zhang, Z.-H.; Li, B.-H.; Wang, Y.-W.; Qian, S. H.; Chen, L.; Shi, M.-W.; Zuo, H.; Chen, Z.-X.	genomics	26/03/2025	2	https://www.biorxiv.org/content/10.1101/2025.03.21.644463v2	The functional significance of long non-coding RNAs (lncRNAs) remains a subject of debate, largely due to the complexity and cost associated with their validation experiments. However, emerging evidence suggests that pseudogenes, once viewed as genomic relics, may contribute to the origin of functional lncRNA genes. In this study spanning eight species, we systematically identified pseudogene-ass…	["I hypothesise that pseudogene-associated lncRNAs directly bind to proteins involved in DNA repair pathways.", "I hypothesise that increased expression of pseudogene-associated lncRNAs correlates with cellular senescence markers in aging tissues.", "I hypothesise that inhibiting pseudogene-associated lncRNA function accelerates age-related functional decline in mice."]	Q1: I hypothesise that pseudogene-associated lncRNAs directly bind to proteins involved in DNA repair pathways. Q2: I hypothesise that increased expression of pseudogene-associated lncRNAs correlates with cellular senescence markers in aging tissues. Q3: I hypothesise that inhibiting pseudogene-associated lncRNA function accelerates age-related functional decline in mice.	I hypothesise that pseudogene-associated lncRNAs directly bind to proteins involved in DNA repair pathways.	I hypothesise that increased expression of pseudogene-associated lncRNAs correlates with cellular senescence markers in aging tissues.	I hypothesise that inhibiting pseudogene-associated lncRNA function accelerates age-related functional decline in mice.
10.1101/2025.03.24.643319	Mechanisms of mitochondrial reactive oxygen species action in bone mesenchymal cells	Ali, M. M.; Nookaew, I.; Resende-Coelho, A.; Marques-Carvalho, A.; Warren, A.; Fu, Q.; Kim, H.-N.; OBrien, C. A.; Almeida, M.	cell biology	27/06/2025	2	https://www.biorxiv.org/content/10.1101/2025.03.24.643319v2	Mitochondrial reactive oxygen species (mtROS), insufficient NAD+, and cellular senescence all contribute to the decrease in bone formation with aging. ROS can cause senescence and decrease NAD+, but it remains unknown whether these mechanisms mediate the effects of ROS in vivo. Here, we generated mice with deletion of the mitochondrial antioxidant enzyme Sod2 in Osx1-Cre (Sp7-tTA, tetO-EGFP/cre) …	[]	Q1: I hypothesise that decreasing mtROS and senescent cells and increasing NAD+ will synergistically delay age-associated osteoporosis. Q2: I hypothesise that mtROS disrupt parathyroid hormone signaling in bone mesenchymal cells. Q3: I hypothesise that mtROS disrupt iron metabolism in bone mesenchymal cells.	I hypothesise that decreasing mtROS and senescent cells and increasing NAD+ will synergistically delay age-associated osteoporosis.	I hypothesise that mtROS disrupt parathyroid hormone signaling in bone mesenchymal cells.	I hypothesise that mtROS disrupt iron metabolism in bone mesenchymal cells.
10.1101/2025.03.24.644902	Scale-dependent brain age with higher-order statistics from structural magnetic resonance imaging	Carnero-Rosell, A.; Janssen, N.; Maselli, A.; Pereda, E.; Huertas-Company, M.; Kitaura, F.-S.	neuroscience	2025-08-05	2	https://www.biorxiv.org/content/10.1101/2025.03.24.644902v2	Inferring chronological age from magnetic resonance imaging (MRI) brain data has become a valuable tool for the early detection of neurodegenerative diseases. We present a method inspired by cosmological techniques for analyzing galaxy surveys, utilizing higher-order summary statistics with multivariate two- and three-point analyses in 3D Fourier space. This method offers physiological interpreta…	["I hypothesise that larger scale brain structural changes are associated with accelerated brain aging.", "I hypothesise that smaller scale brain structural increases correlate with reduced cortical thickness in aging individuals.", "I hypothesise that higher-order statistical analysis of MRI data can predict individual brain age with less than 5 years MAE."]	Q1: I hypothesise that larger scale brain structural changes are associated with accelerated brain aging. Q2: I hypothesise that smaller scale brain structural increases correlate with reduced cortical thickness in aging individuals. Q3: I hypothesise that higher-order statistical analysis of MRI data can predict individual brain age with less than 5 years MAE.	I hypothesise that larger scale brain structural changes are associated with accelerated brain aging.	I hypothesise that smaller scale brain structural increases correlate with reduced cortical thickness in aging individuals.	I hypothesise that higher-order statistical analysis of MRI data can predict individual brain age with less than 5 years MAE.
10.1101/2025.03.24.644846	Reduced neural sensitivity to musical tempo despite enhanced neural tracking of musical features in older adults	Ren, Y.; Weineck, K.; Henry, M. J.; Herrmann, B.	neuroscience	15/07/2025	2	https://www.biorxiv.org/content/10.1101/2025.03.24.644846v2	A substantial body of prior research has focused on how aging affects the neural processing of speech, whereas less is known about how older adults encode naturalistic music. Here, we investigated whether the neural tracking of different features in naturalistic music differs between age groups. Younger and older adults (both sexes) listened to excerpts of naturalistic music with different tempi …	["I hypothesise that older adults will exhibit reduced neural tracking of spectral flux at higher musical tempi compared to younger adults.", "I hypothesise that enhanced neural tracking of sound onsets in older adults is associated with decreased sensitivity to musical tempo.", "I hypothesise that increased cortical hyperactivity in older adults impairs their ability to discriminate between diff…	Q1: I hypothesise that older adults will exhibit reduced neural tracking of spectral flux at higher musical tempi compared to younger adults. Q2: I hypothesise that enhanced neural tracking of sound onsets in older adults is associated with decreased sensitivity to musical tempo. Q3: I hypothesise that increased cortical hyperactivity in older adults impairs their ability to discriminate between …	I hypothesise that older adults will exhibit reduced neural tracking of spectral flux at higher musical tempi compared to younger adults.	I hypothesise that enhanced neural tracking of sound onsets in older adults is associated with decreased sensitivity to musical tempo.	I hypothesise that increased cortical hyperactivity in older adults impairs their ability to discriminate between different musical tempi.
10.1101/2025.03.18.642594	The Global Wheat Full Semantic Organ Segmentation (GWFSS) dataset	Wang, Z.; Zenkl, R.; Greche, L.; De Solan, B.; Bernigaud Samatan, L.; Ouahid, S.; Visioni, A.; Robles-Zazueta, C. A.; Pinto, F.; Perez-Olivera, I.; Reynolds, M. P.; Zhu, C.; Liu, S.; D'argaignon, M.-P.; Lopez-Lozano, R.; Weiss, M.; Marzougui, A.; Roth, L.; Dandrifosse, S.; Carlier, A.; Dumont, B.; Mercatoris, B.; Fernandez, J.; Chapman, S.; Najafian, K.; Stavness, I.; Wang, H.; Guo, W.; Virlet, N…	plant biology	27/05/2025	2	https://www.biorxiv.org/content/10.1101/2025.03.18.642594v2	Computer vision is increasingly used in farmers fields and agricultural experiments to quantify important traits. Imaging setups with a sub-millimetre ground sampling distance enable the detection and tracking of plant features, including size, shape, and colour. Although todays AI-driven foundation models segment almost any object in an image, they still fail for complex plant canopies. To impro…	[]	Q1: I hypothesise that excluding senescent tissues from wheat canopy segmentation improves disease quantification accuracy. Q2: I hypothesise that improved stem segmentation precision will enhance disease detection in wheat canopies.	I hypothesise that excluding senescent tissues from wheat canopy segmentation improves disease quantification accuracy.	I hypothesise that improved stem segmentation precision will enhance disease detection in wheat canopies.
10.1101/2025.03.16.642675	Diurnal Regulation of Urinary Behavior and Gene Expression in Aged Mice	Taylor, D. S.; Allotey, A. A.; Fanelli, R. E.; Satyanarayana, S. B.; Bettadapura, S. S.; Wyatt, C. R.; Landen, J.; Nelson, A. C.; Schmitt, E. E.; Bruns, D. R.; Bedford, N. L.	physiology	26/03/2025	2	https://www.biorxiv.org/content/10.1101/2025.03.16.642675v2	Nocturia, defined as waking one or more times per night to urinate, is a prevalent and burdensome condition with few effective treatments. While the primary risk factor for nocturia is advanced age, few preclinical studies have addressed the pathophysiological mechanisms of nocturia in older subjects. Here, we develop a translational model of nocturia using aging mice and a behavioral paradigm th…	["I hypothesise that restoring diurnal Piezo1 expression in aged mouse bladders will reduce nocturia.", "I hypothesise that aged mice exhibit reduced bladder mechanosensitivity due to disrupted diurnal Piezo1 regulation.", "I hypothesise that targeting circadian genes in aged mouse kidneys will improve urinary voiding patterns."]	Q1: I hypothesise that restoring diurnal Piezo1 expression in aged mouse bladders will reduce nocturia. Q2: I hypothesise that aged mice exhibit reduced bladder mechanosensitivity due to disrupted diurnal Piezo1 regulation. Q3: I hypothesise that targeting circadian genes in aged mouse kidneys will improve urinary voiding patterns.	I hypothesise that restoring diurnal Piezo1 expression in aged mouse bladders will reduce nocturia.	I hypothesise that aged mice exhibit reduced bladder mechanosensitivity due to disrupted diurnal Piezo1 regulation.	I hypothesise that targeting circadian genes in aged mouse kidneys will improve urinary voiding patterns.
10.1101/2025.03.07.642010	Orexin neurons couple pupil-linked arousal to Agrp hunger neurons to shape adaptive eating and food value perception	Kosar, S.; Bracey, E.; Du, Y.; Peleg-Raibstein, D.; Burdakov, D.	neuroscience	22/04/2025	2	https://www.biorxiv.org/content/10.1101/2025.03.07.642010v2	Arousal and hunger are basic essentials for survival, and their modulation is of general interest in daily life and across highly prevalent human conditions1-15. Here we show that their rapid fluctuations16-23 are linked, identify responsible neurons, and demonstrate roles of this link in behavior, perception, and disease. First, using pupillometry as a direct metric of arousal18, we found that s…	["I hypothesise that orexin neuron ablation impairs the ability of non-food stimuli to suppress Agrp neuron activity and reduce feeding in aged mice.", "I hypothesise that orexin neuron dysfunction during aging leads to increased Agrp neuron activity during REM sleep, contributing to overeating.", "I hypothesise that restoring orexin neuron function in aged mice reverses the disruption of feedfor…	Q1: I hypothesise that orexin neuron ablation impairs the ability of non-food stimuli to suppress Agrp neuron activity and reduce feeding in aged mice. Q2: I hypothesise that orexin neuron dysfunction during aging leads to increased Agrp neuron activity during REM sleep, contributing to overeating. Q3: I hypothesise that restoring orexin neuron function in aged mice reverses the disruption of fee…	I hypothesise that orexin neuron ablation impairs the ability of non-food stimuli to suppress Agrp neuron activity and reduce feeding in aged mice.	I hypothesise that orexin neuron dysfunction during aging leads to increased Agrp neuron activity during REM sleep, contributing to overeating.	I hypothesise that restoring orexin neuron function in aged mice reverses the disruption of feedforward Agrp neuron inhibition by palatable food.
10.1101/2025.03.04.641461	Differential activation of p53-Lamin A/C and p16-RB mediated senescence pathways in trophoblast from pregnancies complicated by type A2 Gestational Diabetes Mellitus	Kadam, L.; Chan, K.; Ahuna, K.; Marshall, N. E.; Myatt, L.	cell biology	2025-06-03	2	https://www.biorxiv.org/content/10.1101/2025.03.04.641461v2	Gestational diabetes mellitus (GDM) increases maternal risks such as hypertension and future type 2 diabetes while also contributing to fetal complications such as large-for-gestational-age infants and stillbirth. The placenta which is crucial for fetal development, exhibits structural and functional changes in GDM, but the impact of these alterations on placental trophoblast function remains unc…	["I hypothesise that increased p53-Lamin A/C pathway activation in GDM trophoblasts reduces placental function.", "I hypothesise that dysregulated p16-RB pathway activation in GDM trophoblasts correlates with fetal growth restriction.", "I hypothesise that reduced p21 expression in GDM trophoblasts impairs {beta}hCG secretion and fetal development."]	Q1: I hypothesise that increased p53-Lamin A/C pathway activation in GDM trophoblasts reduces placental function. Q2: I hypothesise that dysregulated p16-RB pathway activation in GDM trophoblasts correlates with fetal growth restriction. Q3: I hypothesise that reduced p21 expression in GDM trophoblasts impairs {beta}hCG secretion and fetal development.	I hypothesise that increased p53-Lamin A/C pathway activation in GDM trophoblasts reduces placental function.	I hypothesise that dysregulated p16-RB pathway activation in GDM trophoblasts correlates with fetal growth restriction.	I hypothesise that reduced p21 expression in GDM trophoblasts impairs {beta}hCG secretion and fetal development.
10.1101/2025.02.28.640639	A genome wide CRISPR screen reveals novel determinants of long-lived plasma cell secretory capacity	D'Souza, L.; Young, J.; Coffman, H. M.; Petrow, E. P.; Bhattacharya, D.	immunology	21/05/2025	2	https://www.biorxiv.org/content/10.1101/2025.02.28.640639v2	Plasma cell subsets vary in their lifespans and ability to sustain humoral immunity. We conducted a genome-wide CRISPR-Cas9 screen in myeloma cells for factors that promote surface expression of CD98, a marker of longevity in mouse plasma cells. A large fraction of genes found to promote CD98 expression in this screen are involved in secretory and other vesicles, including subunits of the V-type …	[]	Q1: I hypothesise that V-type ATPase inhibition reduces antibody secretion in long-lived plasma cells. Q2: I hypothesise that MYD88 signaling is required for the survival of long-lived plasma cells. Q3: I hypothesise that increased acidified vesicles correlate with increased antibody secretion in long-lived plasma cells.	I hypothesise that V-type ATPase inhibition reduces antibody secretion in long-lived plasma cells.	I hypothesise that MYD88 signaling is required for the survival of long-lived plasma cells.	I hypothesise that increased acidified vesicles correlate with increased antibody secretion in long-lived plasma cells.
10.1101/2024.04.09.588665	Microglia aging in the hippocampus advances through intermediate states that drive activation and cognitive decline	Shea, J. M.; Villeda, S. A.	neuroscience	2025-03-01	2	https://www.biorxiv.org/content/10.1101/2024.04.09.588665v2	During aging, microglia - the resident macrophages of the brain - exhibit altered phenotypes and contribute to age-related neuroinflammation. While numerous hallmarks of age-related microglia have been elucidated, the progression from homeostasis to dysfunction during the aging process remains unresolved. To bridge this gap in knowledge, we undertook complementary cellular and molecular analyses …	["I hypothesise that inhibiting TGF1 signaling in hippocampal microglia will prevent their advancement through intermediate aging states.", "I hypothesise that preventing microglial advancement through intermediate aging states will ameliorate hippocampal-dependent cognitive decline in aged mice.", "I hypothesise that heterochronic parabiosis accelerates microglial progression through intermediat…	Q1: I hypothesise that inhibiting TGF1 signaling in hippocampal microglia will prevent their advancement through intermediate aging states. Q2: I hypothesise that preventing microglial advancement through intermediate aging states will ameliorate hippocampal-dependent cognitive decline in aged mice. Q3: I hypothesise that heterochronic parabiosis accelerates microglial progression through interme…	I hypothesise that inhibiting TGF1 signaling in hippocampal microglia will prevent their advancement through intermediate aging states.	I hypothesise that preventing microglial advancement through intermediate aging states will ameliorate hippocampal-dependent cognitive decline in aged mice.	I hypothesise that heterochronic parabiosis accelerates microglial progression through intermediate aging states in the mouse hippocampus.
10.1101/2024.04.04.588128	Hyperactive 20S Proteasome Enhances Proteostasis and ERAD in C. elegans via degradation of Intrinsically Disordered Proteins.	Salcedo-Tacuma, D.; Asad, N.; Howells, G.; Anderson, R.; Smith, D. M.	cell biology	2025-09-04	2	https://www.biorxiv.org/content/10.1101/2024.04.04.588128v2	Age-related proteinopathies, including Alzheimers and Parkinsons disease, are driven by the toxic accumulation of misfolded proteins, particularly intrinsically disordered proteins (IDPs), that overwhelm cellular proteostasis. The proteasome is responsible for the clearance of these proteins, but it is unclear why it fails to do so in these diseases. Here, we report a novel strategy employing a C…	["I hypothesise that hyperactivating the 20S proteasome in C. elegans extends lifespan by increasing the degradation rate of intrinsically disordered proteins.", "I hypothesise that a hyperactive 20S proteasome enhances ER-associated degradation independently of the canonical unfolded protein response.", "I hypothesise that increased clearance of aggregation-prone proteins by a hyperactive 20S pr…	Q1: I hypothesise that hyperactivating the 20S proteasome in C. elegans extends lifespan by increasing the degradation rate of intrinsically disordered proteins. Q2: I hypothesise that a hyperactive 20S proteasome enhances ER-associated degradation independently of the canonical unfolded protein response. Q3: I hypothesise that increased clearance of aggregation-prone proteins by a hyperactive 20…	I hypothesise that hyperactivating the 20S proteasome in C. elegans extends lifespan by increasing the degradation rate of intrinsically disordered proteins.	I hypothesise that a hyperactive 20S proteasome enhances ER-associated degradation independently of the canonical unfolded protein response.	I hypothesise that increased clearance of aggregation-prone proteins by a hyperactive 20S proteasome reduces oxidative damage in C. elegans.
10.1101/2024.04.01.587651	Nanoscale domains govern local diffusion and aging within FUS condensates	Gao, G.; Sumrall, E. R.; Walter, N. G.	biophysics	2025-09-04	2	https://www.biorxiv.org/content/10.1101/2024.04.01.587651v2	Biomolecular condensates regulate cellular physiology by sequestering and processing RNAs and proteins, yet how these processes are locally tuned within condensates remains unclear. Moreover, in neurodegenerative diseases such as amyotrophic lateral sclerosis (ALS), condensates undergo liquid-to-solid phase transitions, but capturing early intermediates in this process has been challenging. Here,…	["I hypothesise that increased nanodomain connectivity within FUS condensates accelerates FUS fibrilization.", "I hypothesise that aging FUS condensates exhibit reduced RNA diffusion within nanodomains.", "I hypothesise that ALS drugs promote FUS fibrilization by altering nanodomain chemical environments."]	Q1: I hypothesise that increased nanodomain connectivity within FUS condensates accelerates FUS fibrilization. Q2: I hypothesise that aging FUS condensates exhibit reduced RNA diffusion within nanodomains. Q3: I hypothesise that ALS drugs promote FUS fibrilization by altering nanodomain chemical environments.	I hypothesise that increased nanodomain connectivity within FUS condensates accelerates FUS fibrilization.	I hypothesise that aging FUS condensates exhibit reduced RNA diffusion within nanodomains.	I hypothesise that ALS drugs promote FUS fibrilization by altering nanodomain chemical environments.
10.1101/2024.03.18.585629	Evaluating the position of the uncal apex as a predictor of episodic memory across the adult lifespan	Bahrd, P.; Andersson, M.; Kalpouzos, G.; Salami, A.; Nordin, K.	neuroscience	25/02/2025	2	https://www.biorxiv.org/content/10.1101/2024.03.18.585629v2	Structural decline of the hippocampus follows heterogeneous spatial patterns, and is an important determinant of episodic memory dysfunction in aging. However, evidence indicate that the anatomical landmark uncal apex, used to demarcate anterior and posterior hippocampal subregions, changes position as the hippocampus atrophies. This risks misclassifying gray matter into the incorrect subregion w…	["I hypothesise that a more anterior uncal apex position is associated with poorer episodic memory performance in adults.", "I hypothesise that the ratio of posterior to anterior hippocampal volume predicts episodic memory performance independently of age.", "I hypothesise that manual uncal apex identification corrects for age-related memory decline misclassification compared to standard methods.…	Q1: I hypothesise that a more anterior uncal apex position is associated with poorer episodic memory performance in adults. Q2: I hypothesise that the ratio of posterior to anterior hippocampal volume predicts episodic memory performance independently of age. Q3: I hypothesise that manual uncal apex identification corrects for age-related memory decline misclassification compared to standard meth…	I hypothesise that a more anterior uncal apex position is associated with poorer episodic memory performance in adults.	I hypothesise that the ratio of posterior to anterior hippocampal volume predicts episodic memory performance independently of age.	I hypothesise that manual uncal apex identification corrects for age-related memory decline misclassification compared to standard methods.
10.1101/2024.03.11.584363	Neuroprotective role of Hippo signaling by microtubule stability control in C. elegans	Lee, H.; Kang, J.; Lee, D.; Lee, S.-H.; Chung, C. H.; Lee, J.	developmental biology	2025-04-03	2	https://www.biorxiv.org/content/10.1101/2024.03.11.584363v2	The evolutionarily conserved Hippo (Hpo) pathway has been shown to impact early development and tumorigenesis by governing cell proliferation and apoptosis. However, its post-developmental roles are relatively unexplored. Here, we demonstrate its roles in post-mitotic cells by showing that defective Hpo signaling accelerates age-associated structural and functional decline of neurons in C. elegan…	["I hypothesise that inhibiting the Hippo pathway accelerates age-associated neuronal decline by destabilizing microtubules.", "I hypothesise that enhancing microtubule stability in aged C. elegans neurons will delay structural and functional decline.", "I hypothesise that YAP-1 activation in post-mitotic neurons is required for Hippo pathway-mediated neuroprotection."]	Q1: I hypothesise that inhibiting the Hippo pathway accelerates age-associated neuronal decline by destabilizing microtubules. Q2: I hypothesise that enhancing microtubule stability in aged C. elegans neurons will delay structural and functional decline. Q3: I hypothesise that YAP-1 activation in post-mitotic neurons is required for Hippo pathway-mediated neuroprotection.	I hypothesise that inhibiting the Hippo pathway accelerates age-associated neuronal decline by destabilizing microtubules.	I hypothesise that enhancing microtubule stability in aged C. elegans neurons will delay structural and functional decline.	I hypothesise that YAP-1 activation in post-mitotic neurons is required for Hippo pathway-mediated neuroprotection.
10.1101/2024.02.23.581770	Mitochondrial origins of the pressure to sleep	Sarnataro, R.; Velasco, C. D.; Monaco, N.; Kempf, A.; Miesenboeck, G.	neuroscience	2025-11-03	2	https://www.biorxiv.org/content/10.1101/2024.02.23.581770v2	To obtain a comprehensive, unbiased view of molecular changes in the brain that may underpin the need for sleep, we have characterized the transcriptomes of single cells isolated from rested and sleep-deprived flies. Transcripts upregulated after sleep deprivation, in sleep-control neurons projecting to the dorsal fan-shaped body (dFBNs) but not ubiquitously in the brain, encode almost exclusivel…	[]	Q1: I hypothesise that mitochondrial fragmentation in dFBNs directly causes increased neuronal excitability and reduced sleep. Q2: I hypothesise that enhanced mitophagy in dFBNs after sleep deprivation is a mechanism to reduce oxidative stress. Q3: I hypothesise that elevated ATP levels in dFBNs during sleep deprivation contribute to the pressure to sleep.	I hypothesise that mitochondrial fragmentation in dFBNs directly causes increased neuronal excitability and reduced sleep.	I hypothesise that enhanced mitophagy in dFBNs after sleep deprivation is a mechanism to reduce oxidative stress.	I hypothesise that elevated ATP levels in dFBNs during sleep deprivation contribute to the pressure to sleep.
10.1101/2024.02.21.581332	CD81+ senescent-like fibroblasts exaggerate inflammation and activate neutrophils via C3/C3aR1 axis in periodontitis	Fu, L.; Yin, C.; Zhao, Q.; Guo, S.; Shao, W.; Xia, T.; Sun, Q.; Chen, L.; Li, J.; Wang, M.; Xia, H.	immunology	21/04/2025	2	https://www.biorxiv.org/content/10.1101/2024.02.21.581332v2	Periodontitis, a prevalent inflammatory disease worldwide, poses a significant economic burden on society and the country. Previous research has established a connection between cellular senescence and periodontitis. However, the role and mechanism of cell senescence in the progression of periodontitis have not been thoroughly investigated. This study aimed to explore the involvement of cellular …	[]	Q1: I hypothesise CD81+ senescent fibroblasts directly induce neutrophil activation via C3/C3aR1 in periodontitis. Q2: I hypothesise senolytic treatment targeting CD81+ senescent fibroblasts reduces periodontitis inflammation. Q3: I hypothesise metformin alleviates periodontitis bone loss by inhibiting fibroblast senescence.	I hypothesise CD81+ senescent fibroblasts directly induce neutrophil activation via C3/C3aR1 in periodontitis.	I hypothesise senolytic treatment targeting CD81+ senescent fibroblasts reduces periodontitis inflammation.	I hypothesise metformin alleviates periodontitis bone loss by inhibiting fibroblast senescence.
10.1101/2024.02.11.579849	Impaired capillary-venous drainage contributes to gliosis and demyelination in white matter during aging	Stamenkovic, S.; Schmid, F.; Gurler, G.; Abolmaali, F.; Weitermann, N.; Takasaki, K. T.; Bonney, S. K.; Sosa, M. J.; Bennett, H. C.; Kim, Y.; Waters, J.; Shih, A.	neuroscience	2025-11-03	2	https://www.biorxiv.org/content/10.1101/2024.02.11.579849v2	The progressive loss of cerebral white matter during aging contributes to cognitive decline, but whether reduced blood flow is a cause or consequence remains debated. Using deep multi-photon imaging in mice, we examined microvascular networks perfusing myelinated tissues in cortical layer 6 and corpus callosum. We identified sparse, wide-reaching venules, termed principal cortical venules, that e…	[]	Q1: I hypothesise that impaired capillary-venous drainage in aging mice causes microgliosis and astrogliosis in deep white matter. Q2: I hypothesise that inducing hypoperfusion in adult mice via carotid artery stenosis replicates aging-associated demyelination in layer 6 and corpus callosum. Q3: I hypothesise that targeting principal cortical venules will improve white matter blood flow and reduc…	I hypothesise that impaired capillary-venous drainage in aging mice causes microgliosis and astrogliosis in deep white matter.	I hypothesise that inducing hypoperfusion in adult mice via carotid artery stenosis replicates aging-associated demyelination in layer 6 and corpus callosum.	I hypothesise that targeting principal cortical venules will improve white matter blood flow and reduce age-related pathology.
10.1101/2025.02.28.640749	Human brain cell-type-specific aging clocks based on single-nuclei transcriptomics	Muralidharan, C.; Zakar-Polyak, E.; Adami, A.; Abbas, A. A.; Sharma, Y.; Garza, R.; Johansson, J. G.; Atacho, D. A. M.; Renner, E.; Palkovits, M.; Kerepesi, C.; Jakobsson, J.; Pircs, K.	neuroscience	25/03/2025	2	https://www.biorxiv.org/content/10.1101/2025.02.28.640749v2	Aging is the primary risk factor for most neurodegenerative diseases, yet the cell-type-specific progression of brain aging remains poorly understood. Here, we developed human cell-type-specific transcriptomic aging clocks using high-quality single-nucleus RNA sequencing data from post mortem human prefrontal cortex tissue of 31 donors aged 18 - 94 years, encompassing 73,941 high-quality nuclei. …	["I hypothesise that increased microglial inflammatory gene expression directly correlates with chronological age in human prefrontal cortex.", "I hypothesise that cell-type-specific transcriptomic aging clocks can predict the rate of cognitive decline in individuals.", "I hypothesise that targeting microglial inflammatory pathways will decelerate brain aging as measured by transcriptomic clocks.…	Q1: I hypothesise that increased microglial inflammatory gene expression directly correlates with chronological age in human prefrontal cortex. Q2: I hypothesise that cell-type-specific transcriptomic aging clocks can predict the rate of cognitive decline in individuals. Q3: I hypothesise that targeting microglial inflammatory pathways will decelerate brain aging as measured by transcriptomic clo…	I hypothesise that increased microglial inflammatory gene expression directly correlates with chronological age in human prefrontal cortex.	I hypothesise that cell-type-specific transcriptomic aging clocks can predict the rate of cognitive decline in individuals.	I hypothesise that targeting microglial inflammatory pathways will decelerate brain aging as measured by transcriptomic clocks.
10.1101/2025.01.26.634899	BubR1 and Mad2 regulate adult midgut remodeling in Drosophila diapause	Adachi, Y.; Nagai, H.; Fujichika, T.; Takahashi, A.; Miura, M.; Nakajima, Y.	developmental biology	30/01/2025	2	https://www.biorxiv.org/content/10.1101/2025.01.26.634899v2	Diapause is a survival strategy in which growth and aging are temporarily suspended, enabling animals to withstand unfavorable environments. Various insects, including the fruit fly Drosophila, enter reproductive diapause, or dormancy, in response to colder temperatures and/or shorter day lengths. During reproductive diapause, ovarian development halts, and non-reproductive organs also undergo re…	["I hypothesise that BubR1 and Mad2 cytoplasmic localization in Drosophila intestinal stem cells is necessary for diapause-induced midgut remodeling.", "I hypothesise that disrupting midgut growth arrest during diapause in Drosophila reduces starvation resistance.", "I hypothesise that cell cycle arrest of intestinal stem cells in Drosophila diapause is mediated by BubR1 and Mad2."]	Q1: I hypothesise that BubR1 and Mad2 cytoplasmic localization in Drosophila intestinal stem cells is necessary for diapause-induced midgut remodeling. Q2: I hypothesise that disrupting midgut growth arrest during diapause in Drosophila reduces starvation resistance. Q3: I hypothesise that cell cycle arrest of intestinal stem cells in Drosophila diapause is mediated by BubR1 and Mad2.	I hypothesise that BubR1 and Mad2 cytoplasmic localization in Drosophila intestinal stem cells is necessary for diapause-induced midgut remodeling.	I hypothesise that disrupting midgut growth arrest during diapause in Drosophila reduces starvation resistance.	I hypothesise that cell cycle arrest of intestinal stem cells in Drosophila diapause is mediated by BubR1 and Mad2.
10.1101/2025.01.22.634221	Optimized protocols for commonly-used murine models of heart failure with preserved ejection fraction.	McIntosh, B.; Elbassioni, A.; Raheem, A.; MacDonald, E. A.; Nicklin, S. A.; Koay, Y. C.; Cameron, E. R.; Loughrey, C. M.; O'Sullivan, J. F.	physiology	27/01/2025	2	https://www.biorxiv.org/content/10.1101/2025.01.22.634221v2	BackgroundHFpEF is a leading cause of death worldwide and clinically relevant preclinical models are required to identify new therapeutic targets. The most clinically representative murine models of heart failure with preserved ejection fraction (HFpEF) in common use include a "2-hit" model combining metabolic stress with hypertension (high-fat diet [HFD] + N(gamma)-nitro-L-arginine methyl ester …	["I hypothesise that increasing L-NAME dosage and protocol length in C57BL/6J mice will induce a more severe HFpEF phenotype.", "I hypothesise that the 4-hit model will induce a more robust and reproducible HFpEF phenotype than the 3-hit model in C57BL/6 mice.", "I hypothesise that the 4-hit model will induce HFpEF in both male and female C57BL/6 mice."]	Q1: I hypothesise that increasing L-NAME dosage and protocol length in C57BL/6J mice will induce a more severe HFpEF phenotype. Q2: I hypothesise that the 4-hit model will induce a more robust and reproducible HFpEF phenotype than the 3-hit model in C57BL/6 mice. Q3: I hypothesise that the 4-hit model will induce HFpEF in both male and female C57BL/6 mice.	I hypothesise that increasing L-NAME dosage and protocol length in C57BL/6J mice will induce a more severe HFpEF phenotype.	I hypothesise that the 4-hit model will induce a more robust and reproducible HFpEF phenotype than the 3-hit model in C57BL/6 mice.	I hypothesise that the 4-hit model will induce HFpEF in both male and female C57BL/6 mice.
10.1101/2025.01.22.634239	Quantitative and sensitive sequencing of somatic mutations induced by a maize transposon	Scherer, J.; Hinczewski, M.; Nelms, B.	plant biology	2025-10-06	2	https://www.biorxiv.org/content/10.1101/2025.01.22.634239v2	Cells accumulate mutations throughout development, contributing to cancer, aging, and evolution. Quantitative data on the abundance of de novo mutations within plants or animals are limited, as new mutations are often rare within a tissue and fall below the limits of current sequencing depths and error rates. Here, we show that mutations induced by the maize Mutator (Mu) transposon can be reliabl…	["I hypothesise that tissue-specific differences in de novo transposon insertion abundance are driven by varying cell division rates.", "I hypothesise that a higher proportion of low-frequency de novo transposon insertions in endosperm contributes to its aging process."]	Q1: I hypothesise that tissue-specific differences in de novo transposon insertion abundance are driven by varying cell division rates. Q2: I hypothesise that a higher proportion of low-frequency de novo transposon insertions in endosperm contributes to its aging process.	I hypothesise that tissue-specific differences in de novo transposon insertion abundance are driven by varying cell division rates.	I hypothesise that a higher proportion of low-frequency de novo transposon insertions in endosperm contributes to its aging process.
10.1101/2024.01.25.577153	A lncRNA-mediated metabolic rewiring of cell senescence	Grossi, E.; Marchese, F. P.; Gonzalez, J.; Goni, E.; Fernandez-Justel, J. M.; Amadoz, A.; Herranz, N.; Puchades-Carrasco, L.; Montes, M.; Huarte, M.	cell biology	2025-03-03	2	https://www.biorxiv.org/content/10.1101/2024.01.25.577153v2	Despite the classical view of senescence as passive growth arrest, senescent cells remain metabolically active to be able to cope with the energetic demand of the senescence program. However, the mechanisms underlying this metabolic reprogramming remain poorly understood. We have identified sin-lncRNA, a previously uncharacterized lncRNA, that plays a pivotal role in this response. Sin-lncRNA is …	["I hypothesise sin-lncRNA depletion in senescent cells impairs mitochondrial oxidative phosphorylation.", "I hypothesise sin-lncRNA loss causes DLST nuclear translocation, altering OXPHOS gene expression.", "I hypothesise sin-lncRNA depletion sensitises senescent ovarian cancer cells to cisplatin treatment."]	Q1: I hypothesise sin-lncRNA depletion in senescent cells impairs mitochondrial oxidative phosphorylation. Q2: I hypothesise sin-lncRNA loss causes DLST nuclear translocation, altering OXPHOS gene expression. Q3: I hypothesise sin-lncRNA depletion sensitises senescent ovarian cancer cells to cisplatin treatment.	I hypothesise sin-lncRNA depletion in senescent cells impairs mitochondrial oxidative phosphorylation.	I hypothesise sin-lncRNA loss causes DLST nuclear translocation, altering OXPHOS gene expression.	I hypothesise sin-lncRNA depletion sensitises senescent ovarian cancer cells to cisplatin treatment.
10.1101/2024.01.17.576017	Cell-autonomous and non-cell-autonomous effects of arginase-II on cardiac aging	Potenza, D. M.; Cheng, X.; AJALBERT, G.; Brenna, A.; Giraud, M.-N.; FROBERT, A.; Cook, S.; Mertz, K. D.; Yang, Z.; Ming, X.-F.	physiology	2025-02-04	2	https://www.biorxiv.org/content/10.1101/2024.01.17.576017v2	Aging is a predominant risk factor for heart disease. Aging heart reveals low-grade chronic inflammation, cell apoptosis, cardiac fibrosis, and increased vulnerability to ischemic injury. The underlying molecular mechanisms responsible for the cardiac aging phenotype and its susceptibility to injury are far from being fully understood. Although previous literature reports a role of the mitochondr…	["I hypothesise that inhibiting arginase-II in macrophages will reduce age-associated cardiac inflammation and myocyte apoptosis.", "I hypothesise that arginase-II in cardiac fibroblasts directly promotes fibrosis via mitochondrial ROS production.", "I hypothesise that arginase-II deficiency in aging mice protects against ischemic heart injury by reducing IL-1{beta} release."]	Q1: I hypothesise that inhibiting arginase-II in macrophages will reduce age-associated cardiac inflammation and myocyte apoptosis. Q2: I hypothesise that arginase-II in cardiac fibroblasts directly promotes fibrosis via mitochondrial ROS production. Q3: I hypothesise that arginase-II deficiency in aging mice protects against ischemic heart injury by reducing IL-1{beta} release.	I hypothesise that inhibiting arginase-II in macrophages will reduce age-associated cardiac inflammation and myocyte apoptosis.	I hypothesise that arginase-II in cardiac fibroblasts directly promotes fibrosis via mitochondrial ROS production.	I hypothesise that arginase-II deficiency in aging mice protects against ischemic heart injury by reducing IL-1{beta} release.
10.1101/2024.01.09.574816	Stimulus-induced gamma sources reduce in power but not in spatial extent with healthy aging in human EEG	Biswas, A.; Kumar, W. S.; Sharma, K.; Ray, S.	neuroscience	2025-11-02	2	https://www.biorxiv.org/content/10.1101/2024.01.09.574816v2	Aging alters brain structure and function, and studying such changes may help understand the neural basis underlying aging and devise interventions to detect deviations from healthy progression. Electroencephalogram (EEG) offers an effective way to study healthy aging owing to its high temporal resolution and affordability. Recent studies have shown that narrow- band stimulus-induced gamma oscill…	["I hypothesise that reduced gamma source power, not spatial extent, is a biomarker for healthy aging.", "I hypothesise that interventions targeting gamma source power, not spatial extent, will mitigate age-related cognitive decline."]	Q1: I hypothesise that reduced gamma source power, not spatial extent, is a biomarker for healthy aging. Q2: I hypothesise that interventions targeting gamma source power, not spatial extent, will mitigate age-related cognitive decline.	I hypothesise that reduced gamma source power, not spatial extent, is a biomarker for healthy aging.	I hypothesise that interventions targeting gamma source power, not spatial extent, will mitigate age-related cognitive decline.
10.1101/2023.12.29.573604	Hyperoxia Induced Alteration of Chromatin Structure in Bone Marrow Derived Primary Mesenchymal Stromal Cells	Monroe, L.; Kaonis, S.; Calahan, N.; Kabi, N.; Ghosh, S.	biophysics	23/01/2025	2	https://www.biorxiv.org/content/10.1101/2023.12.29.573604v2	Chromatin is a highly dynamic entity of the eukaryotic cell nucleus. New evidence is emerging in support of the notion that chromatin can locally and globally rearrange itself to adapt with the cellular microenvironmental changes. Such changes include oxidative stress such as supraphysiological oxygen level, found in hyperoxia. Although it is known that hyperoxia can result in DNA damage and alte…	["I hypothesise that inhibiting EZH2 will prevent hyperoxia-induced chromatin remodeling in mesenchymal stromal cells.", "I hypothesise that hyperoxia-induced DNA damage in mesenchymal stromal cells is mediated by chromatin remodeling.", "I hypothesise that GSK126 pretreatment reduces epigenetic modifications under hyperoxia in mesenchymal stromal cells."]	Q1: I hypothesise that inhibiting EZH2 will prevent hyperoxia-induced chromatin remodeling in mesenchymal stromal cells. Q2: I hypothesise that hyperoxia-induced DNA damage in mesenchymal stromal cells is mediated by chromatin remodeling. Q3: I hypothesise that GSK126 pretreatment reduces epigenetic modifications under hyperoxia in mesenchymal stromal cells.	I hypothesise that inhibiting EZH2 will prevent hyperoxia-induced chromatin remodeling in mesenchymal stromal cells.	I hypothesise that hyperoxia-induced DNA damage in mesenchymal stromal cells is mediated by chromatin remodeling.	I hypothesise that GSK126 pretreatment reduces epigenetic modifications under hyperoxia in mesenchymal stromal cells.
10.1101/2025.01.28.635321	Endurance training restores ageing-impaired lysosomal biogenesis factors in rest and response to acute exercise in rat skeletal muscle	Rajabi, H.; Askari, B.; Clarke, D. C.	cell biology	2025-11-03	2	https://www.biorxiv.org/content/10.1101/2025.01.28.635321v2	PurposeLysosomes, crucial for autophagy, play a pivotal role in cellular processes influenced by exercise. This study investigates the impact of ageing on lysosomal function, focusing on Transcription Factor E3 and its regulators, mTORC1 and Calcineurin, emphasizing their response and adaptation to endurance training MethodsTwenty-five male Sprague-Dawley rats were categorised into Young (2 month…	["I hypothesise that aged rats with impaired TFE3 activity will exhibit reduced skeletal muscle mass compared to young rats.", "I hypothesise that endurance training will increase Calcineurin mRNA levels in aged rat skeletal muscle.", "I hypothesise that increased pTFE3/TFE3total protein ratio in aged rats is directly associated with sarcopenia."]	Q1: I hypothesise that aged rats with impaired TFE3 activity will exhibit reduced skeletal muscle mass compared to young rats. Q2: I hypothesise that endurance training will increase Calcineurin mRNA levels in aged rat skeletal muscle. Q3: I hypothesise that increased pTFE3/TFE3total protein ratio in aged rats is directly associated with sarcopenia.	I hypothesise that aged rats with impaired TFE3 activity will exhibit reduced skeletal muscle mass compared to young rats.	I hypothesise that endurance training will increase Calcineurin mRNA levels in aged rat skeletal muscle.	I hypothesise that increased pTFE3/TFE3total protein ratio in aged rats is directly associated with sarcopenia.
10.1101/2025.01.27.634647	Non-visual light modulates behavioral memory and gene expression in C. elegans	Ji, Z.; Wang, B.; Liu, J.; Chandra, R. K.; Yang, W.; Long, Y.; Egan, M.; L'Etoile, N.; Ma, D. K.	physiology	16/07/2025	2	https://www.biorxiv.org/content/10.1101/2025.01.27.634647v2	Visible light influences a range of physiological processes, yet how animals respond to it independently of the visual system remains largely unknown. Here, we uncover a previously undescribed light-induced transcriptional pathway that modulates behavioral plasticity in C. elegans, a roundworm without eyes. We demonstrate that ambient visible light or controlled-intensity visible-spectrum LED act…	["I hypothesise that light-induced cyp-14A5 expression accelerates aging in C. elegans.", "I hypothesise that ZIP-2 and CEBP-2 mediate light-induced behavioral plasticity in C. elegans.", "I hypothesise that shorter wavelengths of light more strongly induce cyp-14A5 expression in C. elegans."]	Q1: I hypothesise that light-induced cyp-14A5 expression accelerates aging in C. elegans. Q2: I hypothesise that ZIP-2 and CEBP-2 mediate light-induced behavioral plasticity in C. elegans. Q3: I hypothesise that shorter wavelengths of light more strongly induce cyp-14A5 expression in C. elegans.	I hypothesise that light-induced cyp-14A5 expression accelerates aging in C. elegans.	I hypothesise that ZIP-2 and CEBP-2 mediate light-induced behavioral plasticity in C. elegans.	I hypothesise that shorter wavelengths of light more strongly induce cyp-14A5 expression in C. elegans.
10.1101/2025.02.20.639379	Dopaminergic Modulation of Short-Term Associative Memory in Caenorhabditis elegans	McMillen, A.; Minervini, C.; Green, R.; Johnson, M. E.; Ansaar, R.; Chew, Y. L.	neuroscience	16/07/2025	2	https://www.biorxiv.org/content/10.1101/2025.02.20.639379v2	Forgetting, the inability to retrieve previously encoded memories, is an active process involving neurotransmission, second messenger signalling, and cytoskeletal modifications. Forgetting is thought to be essential to remove irrelevant memories and to increase the capacity to encode new memories. Therefore, identifying key regulators of active forgetting is crucial to advance our understanding o…	["I hypothesise that DOP-2 and DOP-3 receptor activity in C. elegans is required for active forgetting of associative memories.", "I hypothesise that dopamine signalling via DOP-2 and DOP-3 receptors declines with age in C. elegans, impairing forgetting.", "I hypothesise that reduced dopamine synthesis in C. elegans leads to enhanced long-term memory retention, independent of age."]	Q1: I hypothesise that DOP-2 and DOP-3 receptor activity in C. elegans is required for active forgetting of associative memories. Q2: I hypothesise that dopamine signalling via DOP-2 and DOP-3 receptors declines with age in C. elegans, impairing forgetting. Q3: I hypothesise that reduced dopamine synthesis in C. elegans leads to enhanced long-term memory retention, independent of age.	I hypothesise that DOP-2 and DOP-3 receptor activity in C. elegans is required for active forgetting of associative memories.	I hypothesise that dopamine signalling via DOP-2 and DOP-3 receptors declines with age in C. elegans, impairing forgetting.	I hypothesise that reduced dopamine synthesis in C. elegans leads to enhanced long-term memory retention, independent of age.
10.1101/2025.02.15.638397	Ultradeep N-glycoproteome Atlas of Mouse Reveals Spatiotemporal Signatures of Brain Aging and Neurodegenerative Diseases	Fang, P.; Yu, X.; ding, m.; Cong, Q.; Jiang, H.; Shi, Q.; Zhao, W.; Zheng, W.; Li, Y.; Ling, Z.; Kong, W.; Yang, P.; Shen, H.	neuroscience	14/05/2025	2	https://www.biorxiv.org/content/10.1101/2025.02.15.638397v2	The current depth of site-specific N-glycoproteomics is insufficient to fully characterize glycosylation events in biological samples. Herein, we achieved an ultradeep and precision analysis of the N-glycoproteome of mouse tissues by integrating multiple workflows. The largest N-glycoproteomic dataset to date was established on mice, which contained 91,972 precursor glycopeptides, 62,216 glycofor…	["I hypothesise that specific N-glycoprotein alterations in the mouse brain are causally linked to accelerated cellular senescence during aging.", "I hypothesise that targeting identified spatiotemporal N-glycoproteomic signatures can mitigate neurodegenerative pathology in aging mice."]	Q1: I hypothesise that specific N-glycoprotein alterations in the mouse brain are causally linked to accelerated cellular senescence during aging. Q2: I hypothesise that targeting identified spatiotemporal N-glycoproteomic signatures can mitigate neurodegenerative pathology in aging mice.	I hypothesise that specific N-glycoprotein alterations in the mouse brain are causally linked to accelerated cellular senescence during aging.	I hypothesise that targeting identified spatiotemporal N-glycoproteomic signatures can mitigate neurodegenerative pathology in aging mice.
10.1101/2025.02.17.638583	Path integration impairments reveal early cognitive changes in Subjective Cognitive Decline	Segen, V.; Kabir, M. R.; Streck, A.; Slavik, J.; Glanz, W.; Butryn, M.; Newman, E. L.; Tiganj, Z.; Wolbers, T.	neuroscience	29/08/2025	2	https://www.biorxiv.org/content/10.1101/2025.02.17.638583v2	Path integration, the ability to track ones position using self-motion cues, is critically dependent on the grid cell network in the entorhinal cortex, a region vulnerable to early Alzheimers disease pathology. In this study, we examined path integration performance in individuals with subjective cognitive decline (SCD), a group at increased risk for Alzheimers disease, and healthy controls using…	["I hypothesise that increased memory leak in path integration predicts future Alzheimer's disease diagnosis in individuals with subjective cognitive decline.", "I hypothesise that path integration deficits, specifically memory leak, are present in subjective cognitive decline before other cognitive impairments are detectable."]	Q1: I hypothesise that increased memory leak in path integration predicts future Alzheimer's disease diagnosis in individuals with subjective cognitive decline. Q2: I hypothesise that path integration deficits, specifically memory leak, are present in subjective cognitive decline before other cognitive impairments are detectable.	I hypothesise that increased memory leak in path integration predicts future Alzheimer's disease diagnosis in individuals with subjective cognitive decline.	I hypothesise that path integration deficits, specifically memory leak, are present in subjective cognitive decline before other cognitive impairments are detectable.
10.1101/2025.02.15.638470	AMPK- and cGAS-Mediated Dual Sensing of Glucose and dsDNA Synergizes to Enhance Antitumor Immunity	Zhou, R.; Pei, J.; Chen, S.; Shen, Q.; Wu, Q.; Liu, S.; Feng, X.-H.; Zou, J.; Liang, T.; Zhang, Y. J.; Lin, S.-C.; Song, P.; Zhang, C.-S.; Zhang, Q.; Xu, P.	cancer biology	25/02/2025	2	https://www.biorxiv.org/content/10.1101/2025.02.15.638470v2	Intratumoral glucose availability is linked considerably to tumor growth, immune evasion, and metastasis. However, the precise molecular mechanisms by which glucose levels govern cellular and immune responses against tumors remain incompletely understood. Here, we explored the context of tumors of intersections between AMP-activated protein kinase (AMPK) and cGAS-STING signaling, a key pathway in…	[]	Q1: I hypothesise that AMPK activation in cancer cells induces cellular senescence via TBK1 phosphorylation at S511. Q2: I hypothesise that glucose deficiency in tumors enhances CD8+ T lymphocyte infiltration through the AMPK-TBK1 pathway. Q3: I hypothesise that combining AMPK agonists with STING agonists significantly reduces melanoma tumor growth in vivo.	I hypothesise that AMPK activation in cancer cells induces cellular senescence via TBK1 phosphorylation at S511.	I hypothesise that glucose deficiency in tumors enhances CD8+ T lymphocyte infiltration through the AMPK-TBK1 pathway.	I hypothesise that combining AMPK agonists with STING agonists significantly reduces melanoma tumor growth in vivo.
10.1101/2025.02.17.638577	Human pluripotent stem cell-derived intestinal epithelial cells maintain small intestine-specific functions over time, even with repeated cell division	Chen, J.; Kuramochi, S.; Horiuchi, S.; Kawasaki, T.; Kakizaki, H.; Tabata, L.; Kimura, T.; Nakamura, K.; Akutsu, H.; Ishida, S.; Kikuchi, A.; Umezawa, A.	cell biology	27/02/2025	2	https://www.biorxiv.org/content/10.1101/2025.02.17.638577v2	The human colon cancer-derived cell line Caco-2 is widely used in drug discovery due to its barrier function and transporter activity. However, Caco-2 cells have extremely low drug metabolic capacity, resulting in discrepancies with human physiology. In this study, we conducted experiments on human intestinal epithelial cells generated from pluripotent stem cell-derived organoids. We assessed cel…	["I hypothesise that pluripotent stem cell-derived intestinal epithelial cells exhibit higher drug metabolic capacity than Caco-2 cells.", "I hypothesise that pluripotent stem cell-derived intestinal epithelial cells maintain small intestine-specific barrier function over repeated cell divisions.", "I hypothesise that cellular aging in pluripotent stem cell-derived intestinal epithelial cells doe…	Q1: I hypothesise that pluripotent stem cell-derived intestinal epithelial cells exhibit higher drug metabolic capacity than Caco-2 cells. Q2: I hypothesise that pluripotent stem cell-derived intestinal epithelial cells maintain small intestine-specific barrier function over repeated cell divisions. Q3: I hypothesise that cellular aging in pluripotent stem cell-derived intestinal epithelial cells…	I hypothesise that pluripotent stem cell-derived intestinal epithelial cells exhibit higher drug metabolic capacity than Caco-2 cells.	I hypothesise that pluripotent stem cell-derived intestinal epithelial cells maintain small intestine-specific barrier function over repeated cell divisions.	I hypothesise that cellular aging in pluripotent stem cell-derived intestinal epithelial cells does not significantly impair their drug metabolic capacity.
10.1101/2025.02.14.638366	Partial Input Loss Differentially Modifies Neural Pathways	Lee, J. Y.; Kastner, D. B.; Harris, S. C.; Santina, L. D.; John, J. V.; Stone, N. S.; Dunn, F. A.	neuroscience	18/06/2025	2	https://www.biorxiv.org/content/10.1101/2025.02.14.638366v2	Following input loss from degeneration, injury, and/or aging, downstream circuits undergo modifications that can impact neural computations. How neural computations across different pathways are affected by common input loss remain understudied. Using the retina to leverage known cell types, well-defined circuitry, and molecular tools, we show how multiple pathways adjust their functional propert…	["I hypothesise that AOFF-T cells exhibit greater functional plasticity than AOFF-S cells following partial cone loss.", "I hypothesise that glutamatergic, GABAergic, and glycinergic circuit alterations underlie AOFF-T cell spatiotemporal tuning changes.", "I hypothesise that partial cone loss differentially impacts the spatiotemporal tuning of AOFF-T versus AOFF-S cells."]	Q1: I hypothesise that AOFF-T cells exhibit greater functional plasticity than AOFF-S cells following partial cone loss. Q2: I hypothesise that glutamatergic, GABAergic, and glycinergic circuit alterations underlie AOFF-T cell spatiotemporal tuning changes. Q3: I hypothesise that partial cone loss differentially impacts the spatiotemporal tuning of AOFF-T versus AOFF-S cells.	I hypothesise that AOFF-T cells exhibit greater functional plasticity than AOFF-S cells following partial cone loss.	I hypothesise that glutamatergic, GABAergic, and glycinergic circuit alterations underlie AOFF-T cell spatiotemporal tuning changes.	I hypothesise that partial cone loss differentially impacts the spatiotemporal tuning of AOFF-T versus AOFF-S cells.
10.1101/2025.02.11.637693	Lymph nodes link sex-biased immune aging to compromised antigen recognition	Menzel, L.; Zschummel, M.; O'Melia, M. J.; Zhou, H.; Lei, P.-J.; Liu, L.; Sen, D. R.; Munn, L. L.; Padera, T. P.	immunology	2025-02-05	2	https://www.biorxiv.org/content/10.1101/2025.02.11.637693v2	A diverse naive CD8 T cell repertoire is essential to provide broad protection against infection and cancer. Aging diminishes naive T cells, reducing potential diversity and leading to lymph node contraction. Here, we revealed that this decline occurs earlier in males, resulting in significant sex differences in immunity during middle age. Earlier in life, naive CD8 T cells in males become virtua…	["I hypothesise that testosterone ablation in middle-aged male mice restores naive CD8 T cell diversity and improves tumor recognition.", "I hypothesise that premature senescence of naive CD8 T cells in males is driven by androgen exposure.", "I hypothesise that lymph node contraction in aging males is primarily caused by androgen-driven thymic atrophy."]	Q1: I hypothesise that testosterone ablation in middle-aged male mice restores naive CD8 T cell diversity and improves tumor recognition. Q2: I hypothesise that premature senescence of naive CD8 T cells in males is driven by androgen exposure. Q3: I hypothesise that lymph node contraction in aging males is primarily caused by androgen-driven thymic atrophy.	I hypothesise that testosterone ablation in middle-aged male mice restores naive CD8 T cell diversity and improves tumor recognition.	I hypothesise that premature senescence of naive CD8 T cells in males is driven by androgen exposure.	I hypothesise that lymph node contraction in aging males is primarily caused by androgen-driven thymic atrophy.
10.1101/2025.02.02.636113	Hair Bundle Degeneration is a Key Contributor to Age-Related Vestibular Dysfunction	Kulasooriya, S.; Liu, H.; Vijayakumar, S.; Bloom, C.; Tu, S.; Borgmeier, B.; Zhou, M.; Tao, L.; Kachar, B.; He, D. Z.	neuroscience	2025-03-07	2	https://www.biorxiv.org/content/10.1101/2025.02.02.636113v2	Age-related vestibular dysfunction (ARVD) is a prevalent, debilitating condition in the elderly. The etiology and molecular mechanisms are poorly understood. We focused on mechanosensitive hair cells (HCs) as they are vulnerable to aging. Using single-cell RNA-seq transcriptomes of young and old mouse vestibular HCs, we show that aging vestibular HCs display both universal molecular signatures, s…	["I hypothesise that reducing genomic instability in vestibular hair cells will delay age-related vestibular dysfunction.", "I hypothesise that restoring proteostasis in vestibular hair cells will improve mechanotransduction in aged mice.", "I hypothesise that targeting mitochondrial dysfunction in vestibular hair cells will prevent hair bundle degeneration."]	Q1: I hypothesise that reducing genomic instability in vestibular hair cells will delay age-related vestibular dysfunction. Q2: I hypothesise that restoring proteostasis in vestibular hair cells will improve mechanotransduction in aged mice. Q3: I hypothesise that targeting mitochondrial dysfunction in vestibular hair cells will prevent hair bundle degeneration.	I hypothesise that reducing genomic instability in vestibular hair cells will delay age-related vestibular dysfunction.	I hypothesise that restoring proteostasis in vestibular hair cells will improve mechanotransduction in aged mice.	I hypothesise that targeting mitochondrial dysfunction in vestibular hair cells will prevent hair bundle degeneration.
10.1101/2025.02.05.636598	BabyPy: a brain-age model for infancy, childhood and adolescence	Biondo, F.; O'Muircheartaigh, J.; Bethlehem, R. A. I.; Seidlitz, J.; Alexander-Bloch, A.; Elison, J.; D'Sa, V.; Deoni, S. C. L.; Bruchhage, M. M. K.; Cole, J. H.	neuroscience	19/02/2025	2	https://www.biorxiv.org/content/10.1101/2025.02.05.636598v2	IntroBrain-age models quantify biological ageing by predicting a persons age from neuroimaging data. In early life, brain-age can reflect underlying biological maturity (or immaturity), providing a candidate predictor of typical neurodevelopment versus deviation. Although widely used in adult research, the use of brain-age in early development has been limited due to data availability, heterogene…	["I hypothesise that a higher BabyPy brain-age prediction in children correlates with poorer cognitive outcomes.", "I hypothesise that deviations in BabyPy brain-age predict future neurological disorders in adolescents.", "I hypothesise that BabyPy brain-age can predict lifespan in later life."]	Q1: I hypothesise that a higher BabyPy brain-age prediction in children correlates with poorer cognitive outcomes. Q2: I hypothesise that deviations in BabyPy brain-age predict future neurological disorders in adolescents. Q3: I hypothesise that BabyPy brain-age can predict lifespan in later life.	I hypothesise that a higher BabyPy brain-age prediction in children correlates with poorer cognitive outcomes.	I hypothesise that deviations in BabyPy brain-age predict future neurological disorders in adolescents.	I hypothesise that BabyPy brain-age can predict lifespan in later life.
10.1101/2023.12.02.569652	The chemotherapy-induced senescence-associated secretome promotes cell detachment and metastatic dissemination through metabolic reprogramming	Cole, A. R.; Buj, R.; Uboveja, A.; Levasseur, E.; Wang, H.; Kedziora, K. M.; Chatoff, A.; Andress Huacachino, A.; Marcinkiewicz, M. M.; Amalric, A.; Yang, B.; Tangudu, N. K.; Danielson, J.; Taher Elhaw, A.; White, S.; Li, D.; Wallace, C. T.; Lazure, F.; Elishaev, E.; Borho, L.; Jazwinska, D. E.; Laird, M. S.; Atiya, H.; Bitler, B. G.; Dangaj, D.; Coffman, L. G.; Tseng, G.; Oesterreich, S.; Gomes,…	cancer biology	2025-12-08	2	https://www.biorxiv.org/content/10.1101/2023.12.02.569652v2	Cellular senescence, characterized by a stable cell cycle arrest, is a well-documented consequence of several widely used chemotherapeutics that has context-dependent roles in cancer. Although senescent cells are non-proliferative, they remain biologically active and secrete a complex and diverse array of factors collectively known as the se-nescence-associated secretome (SAS), which exerts pro-t…	["I hypothesise that inhibiting Complex I activity will reduce chemotherapy-induced senescence-associated secretome-mediated cell detachment in ovarian cancer.", "I hypothesise that reducing fructose levels in the microenvironment will decrease senescence-associated secretome-driven ovarian cancer cell detachment.", "I hypothesise that targeting the NAD+-SIRT-SREBP axis will inhibit senescence-as…	Q1: I hypothesise that inhibiting Complex I activity will reduce chemotherapy-induced senescence-associated secretome-mediated cell detachment in ovarian cancer. Q2: I hypothesise that reducing fructose levels in the microenvironment will decrease senescence-associated secretome-driven ovarian cancer cell detachment. Q3: I hypothesise that targeting the NAD+-SIRT-SREBP axis will inhibit senescenc…	I hypothesise that inhibiting Complex I activity will reduce chemotherapy-induced senescence-associated secretome-mediated cell detachment in ovarian cancer.	I hypothesise that reducing fructose levels in the microenvironment will decrease senescence-associated secretome-driven ovarian cancer cell detachment.	I hypothesise that targeting the NAD+-SIRT-SREBP axis will inhibit senescence-associated secretome-induced ovarian cancer cell detachment.
10.1101/2025.08.29.673010	Aging alters the distribution, stability, and transcriptional signature of engram cells	Fuentes-Ramos, M.; Alaiz-Noya, M.; Miozzo, F.; Vieites-Prado, A.; Fernandez-Albert, J.; Renier, N.; Barco, A.	neuroscience	2025-03-09	1	https://www.biorxiv.org/content/10.1101/2025.08.29.673010v1	While aging impairs memory precision, its effects on engram dynamics and gene expression remain poorly understood. To address this, we used TRAP2 activity-reporter mice, nuclear tagging, and FOS-based activity mapping to track neurons activated during contextual fear memory encoding and reactivated during recall in young and aged mice. Across 378 brain regions, we quantified engram size, spatial …	[]	Q1: I hypothesise aged mice show reduced engram cell reactivation stability compared to young mice. Q2: I hypothesise aging alters the transcriptional signature of engram cells involved in memory recall. Q3: I hypothesise engram cell distribution in aged mice is spatially altered compared to young mice.	I hypothesise aged mice show reduced engram cell reactivation stability compared to young mice.	I hypothesise aging alters the transcriptional signature of engram cells involved in memory recall.	I hypothesise engram cell distribution in aged mice is spatially altered compared to young mice.
10.1101/2025.09.02.673776	Memory-Related Default-Executive Coupling Across the Lifespan and Associations with Changes in Cognitive Control	Blakstad, E. G.; Sneve, M.; Vidal-Pineiro, D.; Walhovd, K. B.; Fjell, A. M.; Grydeland, H.	neuroscience	2025-03-09	1	https://www.biorxiv.org/content/10.1101/2025.09.02.673776v1	Episodic memory and cognitive control declines in aging. The default-executive coupling hypothesis of aging (DECHA) suggests that a neural correlate of cognitive decline in aging is increased functional connectivity (FC) between lateral prefrontal areas and the default mode network. Here, in a lifespan sample (n=552, 6-81years), we tested FC between the left dorsolateral prefrontal cortex (dLPFC)…	[]	Q1: I hypothesise that increased functional connectivity between the dLPFC and DMN in older adults is associated with poorer episodic memory performance. Q2: I hypothesise that reduced functional connectivity between the dLPFC and DMN in younger adults is associated with better cognitive control. Q3: I hypothesise that age-related increases in dLPFC-DMN functional connectivity are directly predic…	I hypothesise that increased functional connectivity between the dLPFC and DMN in older adults is associated with poorer episodic memory performance.	I hypothesise that reduced functional connectivity between the dLPFC and DMN in younger adults is associated with better cognitive control.	I hypothesise that age-related increases in dLPFC-DMN functional connectivity are directly predictive of slower Stroop inhibition task completion times.
10.1101/2025.08.29.673011	Rejuvenation-Responsive and Senolytic-Sensitive Muscle Stem Cells Unveiled by CD200 and CD63 in Geriatric Muscle	Kim, Y. L.; Jo, Y.-W.; Yoo, T.; Yoo, K.; Kim, J.-H.; Park, M.; Song, I.-W.; Kim, H.; Kim, Y.-E.; Hann, S.-H.; Park, J.-E.; Baek, D.; Kong, Y.-Y.	developmental biology	2025-02-09	1	https://www.biorxiv.org/content/10.1101/2025.08.29.673011v1	Muscle stem cells (MuSCs) are parenchymal cells in skeletal muscle regeneration and maintenance. With aging, MuSCs experience a decline in their regenerative function and reduction in their number. However, recent evidence points to substantial heterogeneity within the aged MuSC population, raising questions about the underlying mechanisms of age-associated dysfunction. Here, we used Pax7CreERT2;…	[]	Q1: I hypothesise that targeting CD63 and CD200 will selectively eliminate senescent muscle stem cells in aged mice. Q2: I hypothesise that DHT treatment will restore proliferative capacity to VCAM1-negative, PAX7-low muscle stem cells in aged mice. Q3: I hypothesise that the emergence of GERI-MuSCs is directly correlated with reduced skeletal muscle regenerative capacity in aging.	I hypothesise that targeting CD63 and CD200 will selectively eliminate senescent muscle stem cells in aged mice.	I hypothesise that DHT treatment will restore proliferative capacity to VCAM1-negative, PAX7-low muscle stem cells in aged mice.	I hypothesise that the emergence of GERI-MuSCs is directly correlated with reduced skeletal muscle regenerative capacity in aging.
10.1101/2025.09.01.673523	The tumor suppressor CYLD acts as a deubiquitinase for mTOR to constrain its activity	Fernandes, S. A.; Pan, J.; Terziyska, D. S.; Koyuncu, S.; Ding, X.; Nemeth, I. B.; Wilhelm, S.; NuÃƒÅ’Ã‹â€ chel, J.; Al-Gburi, S.; Gonidas, C.; Pasparakis, M.; Mosialos, G.; Szell, M.; Teleman, A. A.; Eming, S. A.; Vilchez, D.; Demetriades, C.	cell biology	2025-02-09	1	https://www.biorxiv.org/content/10.1101/2025.09.01.673523v1	Proper control of mTOR (mechanistic/mammalian target of rapamycin) signaling is relevant for health, disease and ageing. Information from intra- and extra-cellular signaling cues is transmitted to mTOR through an intricate signaling network that impinges on the Rag and Rheb GTPases to regulate its localization and activity. Interestingly, although mTOR is a heavily ubiquitinated protein, the role…	[]	Q1: I hypothesise that CYLD deubiquitination of mTORC1 is required for serum starvation-induced cell death. Q2: I hypothesise that CYLD loss-of-function accelerates aging phenotypes in C. elegans by promoting mTORC1 hyperactivation. Q3: I hypothesise that inhibiting CYLD activity in human skin cells increases mTORC1 activity and cell size.	I hypothesise that CYLD deubiquitination of mTORC1 is required for serum starvation-induced cell death.	I hypothesise that CYLD loss-of-function accelerates aging phenotypes in C. elegans by promoting mTORC1 hyperactivation.	I hypothesise that inhibiting CYLD activity in human skin cells increases mTORC1 activity and cell size.
10.1101/2025.08.29.673062	The tyrosine kinase inhibitor GNF-7 targets senescent cells through allosteric activation of GCN2.	Lopez-Pernas, G.; Murga, M.; Ahmed, W.; Haggblad, M.; Jimenez-Ortega, E.; Serrano, A. G.; Cardona, C.; Lopez-Prieto, M.; Fisicaro, S.; Mota-Pino, J.; Navarro-Gonzalez, B.; Zarzuela, E.; Anton, M. E.; Lidemalm, L.; Matinez, S.; Isasa, M.; Pastor, J.; Fernandez-Leiro, R.; Huhn, D.; Fernandez-Capetillo, O.	cancer biology	2025-02-09	1	https://www.biorxiv.org/content/10.1101/2025.08.29.673062v1	The one-two-punch approach refers to the sequential administration of two different chemotherapies, the second of which targets cancer cells that resisted the initial treatment. To find such a second punch, we performed a chemical screen to find drugs that are preferentially toxic for cells with an activated DNA damage response (DDR). This screen identified the tyrosine kinase inhibitor GNF-7 as …	[]	Q1: I hypothesise GNF-7 selectively kills senescent cells by allosterically activating GCN2. Q2: I hypothesise GNF-7's senolytic activity is independent of tyrosine kinase inhibition. Q3: I hypothesise GNF-7 synergizes with CDK4/6 inhibitors to eliminate resistant senescent cells.	I hypothesise GNF-7 selectively kills senescent cells by allosterically activating GCN2.	I hypothesise GNF-7's senolytic activity is independent of tyrosine kinase inhibition.	I hypothesise GNF-7 synergizes with CDK4/6 inhibitors to eliminate resistant senescent cells.
10.1101/2025.01.06.631346	TERT prevents obesity-induced metabolic disorders by promoting adipose stem cell expansion and differentiation	Braud, L.; Bernabe, M.; Vernerey, J.; Miranda, A. M. A.; Dominguez, A.; Churikov, D.; Richaud, M.; McAllan, L.; Lachaud, C.; Gil, J.; Scott, W.; Geli, V.	physiology	2025-06-01	1	https://www.biorxiv.org/content/10.1101/2025.01.06.631346v1	Obesity is linked to limited adipose tissue (AT) remodeling capacity, leading to hypertrophic adipocytes, senescence, and inflammation. We used a mouse model expressing mTert (p21+/Tert) from the Cdkn1a locus to investigate the role of mTERT in obesity-induced metabolic disorders. Conditional expression of mTERT reduces metabolic disorders associated with obesity. In AT, this is accompanied by a …	["I hypothesise that increased TERT expression in adipose stem and progenitor cells reduces obesity-induced senescence.", "I hypothesise that TERT catalytic activity is required for promoting adipocyte formation in obese mice.", "I hypothesise that TERT remodels adipose tissue macrophage populations in obese mice."]	Q1: I hypothesise that increased TERT expression in adipose stem and progenitor cells reduces obesity-induced senescence. Q2: I hypothesise that TERT catalytic activity is required for promoting adipocyte formation in obese mice. Q3: I hypothesise that TERT remodels adipose tissue macrophage populations in obese mice.	I hypothesise that increased TERT expression in adipose stem and progenitor cells reduces obesity-induced senescence.	I hypothesise that TERT catalytic activity is required for promoting adipocyte formation in obese mice.	I hypothesise that TERT remodels adipose tissue macrophage populations in obese mice.
10.1101/2025.01.05.631360	NF-ÃƒÅ½Ã‚ÂºB mediates transactivation of HNRNPD, resulting in PTEN destabilization and constitutive activation of the PI3K-AKT pathway in oral cancer cells	Kumar, V.; Mittal, A.; Kumar, A.; Lone, M. R.; Yadav, V.; Verma, P.; Pradhan, D.; Mishra, D.; Thakar, A.; Chauhan, S. S.	cancer biology	2025-05-01	1	https://www.biorxiv.org/content/10.1101/2025.01.05.631360v1	Heterogeneous Ribonucleoprotein D (hnRNPD), an RNA binding protein transcriptionally upregulated by NF-{kappa}B transcription factor, is associated with poor outcome of Oral Squamous Cell Carcinoma (OSCC). However, the role of hnRNPD in OSCC remains elusive. This study reveals that hnRNPD positively affects the proliferation, migration, invasion, and survival of OSCC cells. Transcriptome profilin…	["I hypothesise that inhibiting hnRNPD will reduce cellular senescence in oral cancer cells.", "I hypothesise that increased hnRNPD expression correlates with reduced PTEN levels in aged oral tissues.", "I hypothesise that blocking NF-ÃƒÅ½Ã‚ÂºB activation will prevent hnRNPD-induced destabilization of PTEN."]	Q1: I hypothesise that inhibiting hnRNPD will reduce cellular senescence in oral cancer cells. Q2: I hypothesise that increased hnRNPD expression correlates with reduced PTEN levels in aged oral tissues. Q3: I hypothesise that blocking NF-ÃƒÅ½Ã‚ÂºB activation will prevent hnRNPD-induced destabilization of PTEN.	I hypothesise that inhibiting hnRNPD will reduce cellular senescence in oral cancer cells.	I hypothesise that increased hnRNPD expression correlates with reduced PTEN levels in aged oral tissues.	I hypothesise that blocking NF-ÃƒÅ½Ã‚ÂºB activation will prevent hnRNPD-induced destabilization of PTEN.
[truncated: 750 more rows]
