# Supplementary material
Source: Research Square preprint supplement (doi:10.21203/rs.3.rs-9060414/v1)
Supplement: Supplementary file 10 [file a1cdd1b42aafcf6362abbeb9.xlsx]

## Sheet: Supp_Table_15
Materials	Company	Catalog number
mTeSR1 medium	Stem Cell Techologies	5870
hESC certified Matrigel	BD Biosciences	354277
Collagenase Type IV	Thermofischer Scientific	17104019
Knockout Serum Replacement	Thermofischer Scientific	10828010
Trypsin	Thermofischer Scientific	15090046
Gluatmax	Thermofischer Scientific	35050061
PenStrep	Thermofischer Scientific	15140163
DMEM F12	Thermofischer Scientific	21331â€“020
Neurobasal	Thermofischer Scientific	21103049
N2	Thermofischer Scientific	17502â€“048
B27 without Vitamin A	Thermofischer Scientific	12587â€“010
SB431542	Stem Cell Techologies	72232
ROCK inhibitor Y27632	Sigma	Y0503-1MG
LDN193189	Stem Cell Techologies	72142
Accuatse	Sigma	A6964-100ML
Poly-L-Ornithine	Sigma	P4957
Laminin	Sigma	L2020
FGF	Peprotech	100-18C
EGF	Peprotech	AF-100-15
BDNF	Peprotech	450-02
GDNF	Peprotech	450-10
L-Ascorbic Acid	Sigma	A4403-100MG
dbCamp	Sigma	D0627-25MG
