# Supplementary material
Source: Research Square preprint supplement (doi:10.21203/rs.3.rs-9060414/v1)
Supplement: Supplementary file 11 [file a1fccb1f2020aa764f1b6d48.xlsx]

## Sheet: Supp_Table_12
--- SHAPIRO-WILK TEST RESULTS ---
Column Name	P-Value	Result
Mm_wt_BACE_Postynaptic_Intensity	6.01e-41	Non-Gaussian
Mm_tg_BACE_Postynaptic_Intensity	2.11e-37	Non-Gaussian
Mm_wt_BACE_Perisynaptic_Intensity	7.83e-26	Non-Gaussian
Mm_tg_BACE_Perisynaptic_Intensity	9.92e-46	Non-Gaussian
Hs_control_BACE_Postsynaptic_Intensity	2.55e-55	Non-Gaussian
Hs_AD_BACE_Postsynaptic_Intensity	3.45e-35	Non-Gaussian
Hs_control_BACE_Perisynaptic_Intensity	4.25e-47	Non-Gaussian
Hs_AD_BACE_Perisynaptic_Intensity	1.7e-63	Non-Gaussian
ipsc_GC_BACE_Postsynaptic_Intensity	3.47e-53	Non-Gaussian
ipsc_mutant_BACE_Postsynaptic_Intensity	1.16e-49	Non-Gaussian
ipsc_GC_BACE_Perisynaptic_Intensity	6.47e-60	Non-Gaussian
ipsc_mutant_BACE_Perisynaptic_Intensity	3.79e-42	Non-Gaussian
Mm_wt_BACE_Postsynaptic_Area	7.52e-35	Non-Gaussian
Mm_tg_BACE_Postsynaptic_Area	1.49e-38	Non-Gaussian
Mm_wt_BACE_Perisynaptic_Area	1.98e-14	Non-Gaussian
Mm_tg_BACE_Perisynaptic_Area	6.59e-39	Non-Gaussian
Hs_control_BACE_Postsynaptic_Area	7.52e-35	Non-Gaussian
Hs_AD_BACE_Postsynaptic_Area	1.49e-38	Non-Gaussian
Hs_control_BACE_Perisynaptic_Area	1.98e-14	Non-Gaussian
Hs_AD_BACE_Perisynaptic_Area	6.59e-39	Non-Gaussian
ipsc_GC_BACE_Postsynaptic_Area	5.58e-42	Non-Gaussian
ipsc_mutant_BACE_Postsynaptic_Area	1.16e-45	Non-Gaussian
ipsc_GC_BACE_Perisynaptic_Area	3.49e-46	Non-Gaussian
ipsc_mutant_BACE_Perisynaptic_Area	7.11e-36	Non-Gaussian
Mm_wt_BACE_Postsynaptic_FWHMy	1.43e-25	Non-Gaussian
Mm_tg_BACE_Postsynaptic_FWHMy	6.51e-31	Non-Gaussian
Mm_wt_BACE_Perisynaptic_FWHMy	1.17e-14	Non-Gaussian
Mm_tg_BACE_Perisynaptic_FWHMy	3.39e-32	Non-Gaussian
Hs_control_BACE_Postsynaptic_FWHMy	1.31e-37	Non-Gaussian
Hs_AD_BACE_Postsynaptic_FWHMy	1.01e-26	Non-Gaussian
Hs_control_BACE_Perisynaptic_FWHMy	6.72e-27	Non-Gaussian
Hs_AD_BACE_Perisynaptic_FWHMy	1.74e-41	Non-Gaussian
ipsc_GC_BACE_Postsynaptic_FWHMy	3.41e-45	Non-Gaussian
ipsc_mutant_BACE_Postsynaptic_FWHMy	5.88e-49	Non-Gaussian
ipsc_GC_BACE_Perisynaptic_FWHMy	5.11e-53	Non-Gaussian
ipsc_mutant_BACE_Perisynaptic_FWHMy	7.63e-38	Non-Gaussian
