# Supplementary material
Source: Research Square preprint supplement (doi:10.21203/rs.3.rs-9060414/v1)
Supplement: Supplementary file 12 [file c7fe28bb122badff8bb18b85.xlsx]

## Sheet: Supp_Table_9
Sno.	relation	n_ground truth	n_random	cutoff_youdenJ	youdenJ_TPR	youdenJ_FPR	youdenJ_J
1	anatomy_anatomy	1000	1000	-2.07177	0.883	0.053	0.83
2	anatomy_gene	1000	1000	-0.125379	0.99	0.009	0.981
3	biologicalprocess_biologicalprocess	1000	1000	-0.846871	0.885	0.12	0.765
4	biologicalprocess_chemicalentity	1000	1000	-1.41552	0.89	0.024	0.866
5	biologicalprocess_gene	1000	1000	-0.323346	0.975	0.085	0.89
6	cellularcomponent_cellularcomponent	1000	1000	-0.0645548	0.6	0.167	0.433
7	cellularcomponent_gene	1000	1000	-0.159845	0.962	0.14	0.822
8	chemicalentity_biologicalprocess	303	303	-1.63369	0.990099	0.00660066	0.983498
9	chemicalentity_chemicalentity	1000	1000	-0.784219	0.989	0.004	0.985
10	chemicalentity_disease	1000	1000	-0.847435	0.996	0.011	0.985
11	chemicalentity_gene	1000	1000	-0.474947	0.986	0.017	0.969
12	chemicalentity_inhibits_biologicalprocess	1000	1000	-1.856	0.966	0.011	0.955
13	chemicalentity_mutation	1000	1000	-3.3309	0.961	0.01	0.951
14	chemicalentity_pathway	1000	1000	-1.02387	0.984	0.016	0.968
15	chemicalentity_promotes_biologicalprocess	1000	1000	-1.12449	0.969	0.003	0.966
16	chemicalentity_protein	1000	1000	-1.21174	0.993	0.002	0.991
17	chemicalentity_tissue	258	258	-1.04816	0.996124	0.0193798	0.976744
18	disease_anatomy	1000	1000	-1.28822	0.985	0.044	0.941
19	disease_chemicalentity	1000	1000	-0.92406	1	0.005	0.995
20	disease_disease	1000	1000	-0.860146	0.925	0.051	0.874
21	disease_gene	1000	1000	-0.220644	0.985	0.038	0.947
22	disease_mutation	425	425	-1.69298	0.945882	0.00235294	0.943529
23	disease_phenotype	1000	1000	-0.864802	0.983	0.019	0.964
24	gene_anatomy	1000	1000	-0.203619	1	0.012	0.988
25	gene_biologicalprocess	1000	1000	-0.231865	0.969	0.077	0.892
26	gene_cellularcomponent	1000	1000	-0.0704213	0.926	0.074	0.852
27	gene_chemicalentity	1000	1000	-0.546345	0.984	0.019	0.965
28	gene_disease	1000	1000	-0.378632	0.977	0.068	0.909
29	gene_gene	1000	1000	-0.214083	0.985	0.079	0.906
30	gene_inhibits_biologicalprocess	1000	1000	-0.421731	0.991	0.01	0.981
31	gene_molecularfunction	1000	1000	-0.340048	0.979	0.033	0.946
32	gene_mutation	252	252	-2.60422	0.928571	0.00396825	0.924603
33	gene_noeffect_biologicalprocess	1000	1000	-0.24236	1	0	1
34	gene_pathway	1000	1000	-0.115319	0.97	0.072	0.898
35	gene_phenotype	1000	1000	-0.59725	0.973	0.051	0.922
36	gene_promotes_biologicalprocess	1000	1000	-0.500492	0.984	0.012	0.972
37	gene_protein	1000	1000	-1.13841	0.904	0.025	0.879
38	gene_tissue	1000	1000	-0.330391	0.94	0.161	0.779
39	molecularfunction_biologicalprocess	848	848	-1.05952	0.887972	0.0813679	0.806604
40	molecularfunction_chemicalentity	1000	1000	-1.96612	0.929	0.011	0.918
41	molecularfunction_molecularfunction	1000	1000	-1.13847	0.914	0.065	0.849
42	mutation_disease	570	570	-2.00596	0.936842	0.00526316	0.931579
43	mutation_gene	277	277	-2.61135	0.909747	0.00361011	0.906137
44	mutation_protein	1000	1000	-2.30144	0.982	0.011	0.971
45	pathway_gene	1000	1000	-0.123742	0.978	0.055	0.923
46	pathway_pathway	1000	1000	-0.296231	0.884	0.098	0.786
47	phenotype_chemicalentity	1000	1000	-0.406196	1	0	1
48	phenotype_disease	1000	1000	-0.572364	0.989	0.015	0.974
49	phenotype_gene	1000	1000	-0.24072	0.99	0.021	0.969
50	phenotype_phenotype	1000	1000	-1.72665	0.92	0.02	0.9
51	plantextract_chemicalentity	1000	1000	-1.58282	0.951	0.014	0.937
52	plantextract_disease	1000	1000	-0.979251	0.964	0.01	0.954
53	pmid_cellularcomponent	1000	1000	-0.972289	0.994	0.037	0.957
54	pmid_chemicalentity	1000	1000	-2.00467	0.993	0.002	0.991
55	pmid_disease	1000	1000	-0.908997	0.995	0.01	0.985
56	pmid_protein	1000	1000	-1.02068	0.999	0	0.999
57	pmid_tissue	1000	1000	-0.720939	0.981	0.038	0.943
58	protein_biologicalprocess	1000	1000	-0.768834	0.958	0.02	0.938
59	protein_cellularcomponent	1000	1000	-0.320686	0.966	0.068	0.898
60	protein_disease	1000	1000	-0.459916	0.998	0.02	0.978
61	protein_molecularfunction	1000	1000	-0.804312	0.962	0.03	0.932
62	protein_pathway	1000	1000	-0.632576	0.968	0.03	0.938
63	protein_phenotype	328	328	-1.51883	0.969512	0.0213415	0.948171
64	protein_protein	1000	1000	-0.714105	0.998	0.025	0.973
65	protein_tissue	1000	1000	-0.708566	0.979	0.047	0.932
