# Supplementary material
Source: Research Square preprint supplement (doi:10.21203/rs.3.rs-9060414/v1)
Supplement: Supplementary file 13 [file cb88e6d7d3d70efc0f764ab9.xlsx]

## Sheet: Supp_Table_11
doi	title	Question	Negative_question			EvoAge_question_response_grades	EvoAge_neg_question_response_grades	lamma_question_response_grades	lamma_neg_question_response_grades	gemma_question_response_grades	gemma_neg_question_response_grades	qwen_question_response_grades	qwen_neg_question_response_grades	EvoAge_PosQues_json_file_grades	EvoAge_NegQues_json_file_grades
10.1101/2025.02.25.639746	Endogenously generated Dutch-type AÃƒÆ’Ã…Â½Ãƒâ€šÃ‚Â² nonfibrillar aggregates dysregulate presynaptic neurotransmission in the absence of detectable inflammation	I hypothesise that endogenously generated nonfibrillar AÃƒÆ’Ã…Â½Ãƒâ€šÃ‚Â² aggregates in APPE693Q mice reduce mitochondrial complex I activity.	I hypothesise that endogenously generated nonfibrillar AÃƒÆ’Ã…Â½Ãƒâ€šÃ‚Â² aggregates in APPE693Q mice do not reduce mitochondrial complex I activity.			8	8	8	7	8	7	10	7	5	5
10.1101/2024.04.19.590241	The energetic stress cytokine GDF15 is elevated in the context of chronic and acute psychosocial stress	I hypothesise that chronic psychosocial stress accelerates biological aging as measured by epigenetic clocks.	I hypothesise that chronic psychosocial stress does not accelerate biological aging as measured by epigenetic clocks.			8	8	8	7	8	7	8	1	5	8
10.1101/2023.12.01.567841	Cortical sensory aging is layer-specific	I hypothesise that increased myelination in layer IV of the somatosensory cortex in older adults correlates with reduced sensory processing speed.	I hypothesise that increased myelination in layer IV of the somatosensory cortex in older adults does not correlate with reduced sensory processing speed.			8	5	8	7	7	7	5	5	5	5
10.1101/2024.01.06.574490	Capsaicin acts as a novel NRF2 agonist to suppress ethanol induced gastric mucosa oxidative damage by directly disrupting the KEAP1-NRF2 interaction	I hypothesise that capsaicin administration reduces age-related oxidative damage in gastric mucosa.	I hypothesise that capsaicin administration does not reduce age-related oxidative damage in gastric mucosa.			8	8	8	5	7	7	8	7	5	1
10.1101/2024.01.31.578137	The heartbeat-evoked potential in young and older adults during attention orienting	I hypothesise that increased interbeat interval (IBI) in older adults is associated with reduced heartbeat-evoked potential (HEP) amplitude.	I hypothesise that increased interbeat interval (IBI) in older adults is not associated with reduced heartbeat-evoked potential (HEP) amplitude.			8	1	8	7	8	9	5	5	5	5
10.1101/2024.10.08.617286	DNA methylation of transposons pattern aging differences across a diverse cohort of dogs from the Dog Aging Project	I hypothesise that increased LINE1 hypomethylation with age is associated with a shorter lifespan in dogs.	I hypothesise that increased LINE1 hypomethylation with age is not associated with a shorter lifespan in dogs.			5	8	9	7	7	7	8	5	5	8
10.1101/2023.12.08.570799	Explaining tip-of-the-tongue experiences in older adults: The role of brain-based and cardiorespiratory fitness factors	I hypothesise that higher cardiorespiratory fitness in older adults will correlate with reduced tip-of-the-tongue experiences.	I hypothesise that higher cardiorespiratory fitness in older adults will not correlate with reduced tip-of-the-tongue experiences.			1	1	8	5	7	9	7	7	8	5
10.1101/2023.11.27.568184	Rate of brain aging associates with future executive function in Asian children and older adults	I hypothesise that a faster rate of brain age gap increase in children predicts poorer future executive function.	I hypothesise that a faster rate of brain age gap increase in children does not predict poorer future executive function.			5	8	8	5	8	7	8	5	5	1
10.1101/2024.01.04.574215	Extracellular matrix and microglial regulation of cognitive aging	I hypothesise that increased hyaluronan in basal ganglia nuclei correlates with worse cognitive performance in aged mice.	I hypothesise that increased hyaluronan in basal ganglia nuclei does not correlate with worse cognitive performance in aged mice.			8	8	8	7	9	8	8	5	7	1
10.1101/2024.11.19.624350	Ovarian germline stem cell dedifferentiation is cytoneme dependent	I hypothesise that disrupting cytoneme function in aging Drosophila ovaries will accelerate germline stem cell decline.	I hypothesise that disrupting cytoneme function in aging Drosophila ovaries will not accelerate germline stem cell decline.			7	9	8	8	8	9	4	1	7	5
10.1101/2024.09.20.614161	hiPSC-derived astrocytes from individuals with schizophrenia induce a dystrophic phenotype in microglial-like cells	I hypothesise that reactive SCZ astrocytes induce a dystrophic phenotype in microglial-like cells by downregulating immune cell proliferation and activation pathways.	I hypothesise that reactive SCZ astrocytes do not induce a dystrophic phenotype in microglial-like cells by downregulating immune cell proliferation and activation pathways.			8	8	8	8	7	7	8	5	5	5
10.1101/2024.10.21.619470	T Cell Receptor Diversity, Cancer and Sex: Insights from 30,000 TCRÃƒÆ’Ã…Â½Ãƒâ€šÃ‚Â² Repertoires	I hypothesise that reduced T cell receptor diversity directly increases cancer incidence in males compared to females.	I hypothesise that reduced T cell receptor diversity does not directly increase cancer incidence in males compared to females.			8	5	8	7	7	5	8	1	1	1
10.1101/2023.06.23.546234	Overexpression of the receptor-like kinase BIR1 gene causes SOBIR1- and EDS1-dependent cell death phenotypes in Arabidopsis	I hypothesise that BIR1 overexpression induces cellular senescence phenotypes in Arabidopsis.	I hypothesise that BIR1 overexpression does not induce cellular senescence phenotypes in Arabidopsis.			1	10	9	8	9	8	7	9	1	1
10.1101/2024.09.02.610398	Circular RNAs accumulate in ageing human placental tissue and in stillbirth, leading to DNA damage and cellular senescence	I hypothesise that increased circ_0000284 abundance in placental cells directly causes DNA damage and cellular senescence.	I hypothesise that increased circ_0000284 abundance in placental cells does not directly cause DNA damage and cellular senescence.			5	8	9	9	7	7	7	2	5	5
10.1101/2020.08.03.233874	The ESCRT protein CHMP5 restricts bone formation by controlling endolysosome-mitochondrion-mediated cell senescence	I hypothesise CHMP5 deficiency in osteogenic cells increases bone formation by reducing cellular senescence.	I hypothesise that CHMP5 deficiency in osteogenic cells does not increase bone formation by reducing cellular senescence.			8	8	8	7	7	9	8	5	8	1
10.1101/2023.10.02.560545	Chronic RNA G-quadruplex Accumulation in Aging and Alzheimer's Disease	I hypothesise that chronic RNA G-quadruplex accumulation directly causes tau aggregation in neurons.	I hypothesise that chronic RNA G-quadruplex accumulation does not directly cause tau aggregation in neurons.			5	8	5	9	9	8	4	1	1	1
10.1101/2024.05.27.596069	Cognitive reserves hold back age-related upregulation of neural activities in speech-in-noise perception	I hypothesise that older musicians will show less age-related increase in frontoparietal neural activity during speech-in-noise tasks than older non-musicians.	I hypothesise that older musicians will show more age-related increase in frontoparietal neural activity during speech-in-noise tasks than older non-musicians.			8	5	7	8	7	7	8	8	8	8
10.1101/2025.07.10.664052	Cdc42 Partitioning by Chaperone Ydj1 During Asymmetric Division and Aging in Yeast	I hypothesise that inhibiting Ydj1 function will increase Cdc42 levels in daughter yeast cells.	I hypothesise that inhibiting Ydj1 function will not increase Cdc42 levels in daughter yeast cells.			5	9	9	9	7	7	7	4	1	1
10.1101/2024.07.12.603275	REM sleep quality is associated with balanced tonic activity of the locus coeruleus during wakefulness	I hypothesise that higher locus coeruleus tonic activity during wakefulness improves REM sleep quality in younger individuals.	I hypothesise that higher locus coeruleus tonic activity during wakefulness does not improve REM sleep quality in younger individuals.			8	8	9	7	8	8	7	5	7	5
10.1101/2024.10.11.617841	Amyloid beta precursor protein contributes to brain aging and learning decline in short-lived turquoise killifish (Nothobranchius furzeri)	I hypothesise that reducing intraneuronal pyroglutamated amyloid beta accumulation will mitigate age-related learning decline in killifish.	I hypothesise that reducing intraneuronal pyroglutamated amyloid beta accumulation will not mitigate age-related learning decline in killifish.			5	8	8	9	8	8	8	5	7	5
10.1101/2023.12.12.571308	Steady-state neuron-predominant LINE-1 encoded ORF1p protein and LINE-1 RNA increase with aging in the mouse and human brain	I hypothesise that increased ORF1p protein in aged neurons directly causes neurotoxicity.	I hypothesise that increased ORF1p protein in aged neurons does not directly cause neurotoxicity.			1	9	8	7	9	7	7	5	5	5
10.1101/2024.04.22.590523	Neural volatility in orbitofrontal cortex underlies affective processing during healthy cognitive aging	I hypothesise that increased orbitofrontal cortex neural volatility in older adults predicts reduced positive affective bias.	I hypothesise that increased orbitofrontal cortex neural volatility in older adults does not predict reduced positive affective bias.			1	8	9	5	7	7	5	8	5	5
10.1101/292722	Small RNA-mediated genomic silencing promotes telomere stability in the absence of telomerase in C. elegans	I hypothesise that loss of WAGO-1 or HRDE-1 in C. elegans lacking telomerase will increase TERRA expression and telomeric DNA damage.	I hypothesise that loss of WAGO-1 or HRDE-1 in C. elegans lacking telomerase will not increase TERRA expression and telomeric DNA damage.			5	1	9	7	8	9	5	10	5	1
10.1101/2023.10.13.562187	Devising reliable and accurate epigenetic clocks: choosing the optimal computational solution	I hypothesise that training age prediction models on principal components reduces accuracy compared to using raw CpG data.	I hypothesise that training age prediction models on principal components does not reduce accuracy compared to using raw CpG data.			8	8	9	9	8	8	7	9	1	8
10.1101/2025.01.26.634923	Cerebellar Purkinje cell stripe patterns reveal a differential vulnerability and resistance to cell loss during normal aging in mice	I hypothesise that Purkinje cells within specific parasagittal stripes are more vulnerable to age-related cell loss than those in other stripes.	I hypothesise that Purkinje cells within specific parasagittal stripes are less vulnerable to age-related cell loss than those in other stripes.			5	10	8	8	7	8	7	8	5	5
10.1101/2025.02.27.640021	MyoRep: a novel reporter system to detect early muscle atrophy in vitro and in vivo	I hypothesise MyoRep reporter activity correlates with the severity of muscle atrophy in aging mice.	I hypothesise that MyoRep reporter activity does not correlate with the severity of muscle atrophy in aging mice.			5	8	8	5	7	9	8	7	8	1
10.1101/2025.01.28.635238	Single-cell profiling reveals a novel RAB13+ endothelial subpopulation and profibrotic mesenchymal cells in the aged human bone marrow	I hypothesise that RAB13+ endothelial cells in aged bone marrow promote fibrosis.	I hypothesise that RAB13+ endothelial cells in aged bone marrow do not promote fibrosis.			7	5	8	7	7	9	7	5	5	1
10.1101/2024.01.20.576435	Axonal distribution of mitochondria maintains neuronal autophagy during aging via eIF2ÃƒÆ’Ã…Â½Ãƒâ€šÃ‚Â²	I hypothesise that reducing axonal mitochondrial content in aging neurons directly impairs autophagic flux.	I hypothesise that reducing axonal mitochondrial content in aging neurons does not directly impair autophagic flux.			8	8	8	7	7	8	8	5	5	5
10.1101/2024.06.08.597928	Endothelin B receptor inhibition rescues aging-dependent neuronal regenerative decline	I hypothesise ETBR inhibition restores aged SGC abundance and Cx43 expression after nerve injury.	I hypothesise that ETBR inhibition does not restore aged SGC abundance and Cx43 expression after nerve injury.			1	8	8	7	7	7	8	5	7	1
10.1101/2025.02.12.637854	3BTRON: A Blood-Brain Barrier Recognition Network	I hypothesise 3BTRON can predict BBB age with >75% accuracy in unseen mouse brain EM images.	I hypothesise that 3BTRON cannot predict BBB age with >75% accuracy in unseen mouse brain EM images.			1	10	7	5	9	8	5	7	5	1
10.1101/2025.02.11.637629	Plat safeguards maternally aged oocytes against programmed cell death through activating the Erk1/2 pathway	I hypothesise that Plat downregulation in aged oocytes directly causes increased apoptosis and ferroptosis.	I hypothesise that Plat downregulation in aged oocytes does not directly cause increased apoptosis and ferroptosis.			8	8	7	7	8	8	7	7	5	1
10.1101/2024.05.03.589404	Improving Predictability, Test-Retest Reliability and Generalisability of Brain-Wide Associations for Cognitive Abilities via Multimodal Stacking	I hypothesise that multimodal MRI stacking predicts cognitive decline in older adults more accurately than single-modality MRI.	I hypothesise that multimodal MRI stacking does not predict cognitive decline in older adults more accurately than single-modality MRI.			1	9	9	5	7	8	9	5	8	5
10.1101/2024.12.24.630287	Inhibition of PDE5 induces rapid non-genomic increase in hippocampal dendritic spines via specific kinases	I hypothesise that tadalafil treatment increases hippocampal dendritic spine density via PKG activation.	I hypothesise that tadalafil treatment does not increase hippocampal dendritic spine density via PKG activation.			8	8	8	7	8	7	8	1	8	1
10.1101/2024.05.21.595193	Parkinson's disease-associated shifts between DNA methylation and DNA hydroxymethylation in human brain	I hypothesise that increased DNA hydroxymethylation in LRRK2 gene promoters is associated with Parkinson's disease.	I hypothesise that increased DNA hydroxymethylation in LRRK2 gene promoters is not associated with Parkinson's disease.			8	9	10	10	9	5	8	10	5	1
10.1101/2024.05.17.594682	No effect of additional education on long-term brain structure: a preregistered natural experiment in thousands of individuals.	I hypothesise that an additional year of education does not alter long-term brain structure in older adults.	I hypothesise that an additional year of education does alter long-term brain structure in older adults.			8	5	7	8	9	7	5	9	5	5
10.1101/2024.10.27.620550	Integrated Spatial and Single-Nuclei Transcriptomic Analysis of Long Non-Coding RNAs in Alzheimer's Disease	I hypothesise OIP5-AS1 upregulation in AD microglia drives pro-inflammatory cytokine secretion.	I hypothesise that OIP5-AS1 downregulation in AD microglia does not drive pro-inflammatory cytokine secretion.			8	8	8	8	8	9	8	5	5	1
10.1101/2024.10.23.619838	Computer prediction and genetic analysis identifies retinoic acid modulation as a driver of conserved longevity pathways in genetically-diverse Caenorhabditis nematodes	I hypothesise that all-trans retinoic acid extends lifespan in C. elegans by activating AAK-2.	I hypothesise that all-trans retinoic acid does not extend lifespan in C. elegans by activating AAK-2.			8	8	9	7	9	9	8	10	5	1
10.1101/2025.03.18.643933	Aging-associated Increase of GATA4 levels in Articular Cartilage is Linked to Impaired Regenerative Capacity of Chondrocytes and Osteoarthritis	I hypothesise that reducing GATA4 levels in aged chondrocytes will restore their cartilage-forming capacity.	I hypothesise that reducing GATA4 levels in aged chondrocytes will not restore their cartilage-forming capacity.			8	8	7	5	8	7	8	5	5	1
10.1101/2025.07.02.662760	Developmental and Aging Changes in Brain Network Switching Dynamics Revealed by EEG Phase Synchronization	I hypothesise that reduced low-frequency power in older adults is due to increased cellular senescence in brain networks.	I hypothesise that reduced low-frequency power in older adults is not due to increased cellular senescence in brain networks.			5	8	8	5	7	7	8	5	5	1
10.1101/2025.07.01.662622	Cell enlargement causes mitotic errors and aneuploidy in cells that evade senescence after CDK4/6 inhibition	I hypothesise that reducing cell size during CDK4/6 inhibition prevents aneuploidy in senescent-evading cells.	I hypothesise that reducing cell size during CDK4/6 inhibition does not prevent aneuploidy in senescent-evading cells.			10	8	8	5	9	7	5	5	5	5
10.1101/2025.06.20.660826	NAD+ boosting by oral nicotinamide mononucleotide administration regulates key metabolic and immune pathways through SIRT1 dependent and independent mechanisms to mitigate diet-induced obesity and dyslipidemia in mice.	I hypothesise NMN administration reduces diet-induced weight gain in mice by increasing energy expenditure via SIRT1.	I hypothesise that NMN administration does not reduce diet-induced weight gain in mice by decreasing energy expenditure via SIRT1.			5	9	8	10	5	7	8	5	8	1
10.1101/2025.05.31.657024	Galectin-3 C-epitope, ANP, PPIA, and albumin function as drug-responsive panel biomarkers and therapeutic targets in aging and pressure overload-induced cardiac hypertrophy	I hypothesise that reducing galectin-3 C-epitope oligomers will reverse cardiac hypertrophy in aging rats.	I hypothesise that reducing galectin-3 C-epitope oligomers will not reverse cardiac hypertrophy in aging rats.			8	8	8	7	7	9	8	5	5	1
10.1101/2025.01.20.633975	Standardised TruAI automated quantification of intracellular neuromelanin granules in human brain tissue sections	I hypothesise that increased optical density of intracellular neuromelanin granules correlates with chronological age in human brain tissue.	I hypothesise that increased optical density of intracellular neuromelanin granules does not correlate with chronological age in human brain tissue.			5	8	9	7	9	8	9	1	5	5
10.1101/2025.04.22.649977	spRefine Denoises and Imputes Spatial Transcriptomics with a Reference-Free Framework Powered by Genomic Language Model	I hypothesise spRefine improves spatial ageing clock accuracy by reducing noise in transcriptomic data.	I hypothesise that spRefine does not improve spatial ageing clock accuracy by increasing noise in transcriptomic data.			1	9	8	8	8	8	8	8	8	1
10.1101/2025.05.02.651974	Loss of age-associated increase in m6A-modified RNA contributes to GABAergic dysregulation in Alzheimer's disease	I hypothesise that restoring age-associated m6A site increases in AD brains will normalize GABRA1 expression.	I hypothesise that restoring age-associated m6A site increases in AD brains will not normalize GABRA1 expression.			8	8	5	7	9	9	5	3	5	1
10.1101/2024.10.18.619025	Elevated Ubiquitin Phosphorylation by PINK1 Contributes to Proteasomal Impairment and Promotes Neurodegeneration	I hypothesise that elevated S65-phosphorylated ubiquitin directly impairs proteasome-substrate interactions in aged neurons.	I hypothesise that elevated S65-phosphorylated ubiquitin does not directly impair proteasome-substrate interactions in aged neurons.			8	8	8	7	7	7	8	5	5	5
10.1101/2024.10.10.617725	Extensive longevity and DNA virus-driven adaptation in nearctic Myotis bats	I hypothesise that increased DNA damage response in long-lived Myotis bats contributes to their longevity.	I hypothesise that increased DNA damage response in long-lived Myotis bats does not contribute to their longevity.			8	8	8	10	7	7	8	10	8	5
10.1101/2024.10.01.616156	Decreased hippocampal neurite density in middle-aged/aging adults following prenatal exposure to higher levels of maternal inflammation	I hypothesise that higher first trimester maternal IL-1RA levels are associated with reduced CA3 neurite density in offspring at age 59.	I hypothesise that higher first trimester maternal IL-1RA levels are not associated with reduced CA3 neurite density in offspring at age 59.			8	5	7	7	7	7	7	7	5	5
10.1101/2024.10.04.616624	The FIP 1.0 Data Set: Highly Resolved Annotated Image Time Series of 4,000 Wheat Plots Grown in Six Years	I hypothesise that earlier senescence ratings correlate with lower grain yield in wheat.	I hypothesise that earlier senescence ratings do not correlate with lower grain yield in wheat.			5	8	8	8	10	8	9	9	5	5
10.1101/2024.11.25.625273	TimeFlies: an snRNA-seq aging clock for the fruit fly head sheds light on sex-biased aging	I hypothesise that loss of lncRNA:roX1 function in Drosophila melanogaster heads reduces lifespan.	I hypothesise that loss of lncRNA:roX1 function in Drosophila melanogaster heads does not reduce lifespan.			8	8	7	7	7	9	8	1	5	5
10.1101/2024.08.07.606966	Histone Variant H3.3 Mediates DNA Repair and cGAS-STING Pathway Activation in Telomere Dysfunction	I hypothesise that depleting histone H3.3 will inhibit cGAS-STING pathway activation in response to telomere dysfunction.	I hypothesise that depleting histone H3.3 will not inhibit cGAS-STING pathway activation in response to telomere dysfunction.			8	9	5	7	8	7	10	7	5	1
10.1101/2024.08.28.610060	Does slow oscillation-spindle coupling contribute to sleep-dependent memory consolidation? A Bayesian meta-analysis	I hypothesise that stronger frontal SO-fast SP coupling is associated with better memory retention in younger adults compared to older adults.	I hypothesise that stronger frontal SO-fast SP coupling is not associated with better memory retention in younger adults compared to older adults.			5	8	7	7	8	10	7	7	5	5
10.1101/2024.06.14.599053	The effects of 17ÃƒÆ’Ã…Â½Ãƒâ€šÃ‚Â±-estradiol treatment on endocrine system revealed by single-nucleus transcriptomic sequencing of hypothalamus	I hypothesise 17ÃƒÆ’Ã…Â½Ãƒâ€šÃ‚Â±-estradiol treatment attenuates aging-induced decrease in synaptic formation pathways in hypothalamic neurons.	I hypothesise that 17ÃŽÂ±-estradiol treatment does not attenuate aging-induced decrease in synaptic formation pathways in hypothalamic neurons.			9	8	9	7	8	9	9	5	5	1
10.1101/2024.07.08.602575	Degradation in Binaural and Spatial Hearing, and Auditory Temporal Processing Abilities, as a Function of Aging	I hypothesise that age-related decline in binaural temporal processing directly impairs spatial hearing acuity in older adults.	I hypothesise that age-related decline in binaural temporal processing does not directly impair spatial hearing acuity in older adults.			1	1	8	7	7	7	9	9	5	5
10.1101/2024.07.24.604963	Muscle stem cells in Duchenne muscular dystrophy exhibit molecular impairments and altered cell fate trajectories impacting regenerative capacity	I hypothesise that DMD satellite cells exhibit increased apoptotic cell death compared to healthy satellite cells.	I hypothesise that DMD satellite cells do not exhibit increased apoptotic cell death compared to healthy satellite cells.			8	10	9	8	7	8	7	5	5	5
10.1101/2024.07.05.602288	Deep-diffeomorphic networks for conditional brain templates	I hypothesise that improved deep-diffeomorphic networks will more accurately capture age-related volumetric changes in specific brain structures.	I hypothesise that improved deep-diffeomorphic networks will not more accurately capture age-related volumetric changes in specific brain structures.			8	8	9	1	7	7	8	5	8	5
10.1101/2024.07.05.602082	Frontal Theta Oscillations and Cognitive Flexibility: Age-Related Modulations in EEG Activity	I hypothesise older adults exhibit reduced midfrontal theta power during cognitive flexibility tasks compared to young adults.	I hypothesise that older adults do not exhibit reduced midfrontal theta power during cognitive flexibility tasks compared to young adults.			5	1	9	7	7	9	8	5	5	1
10.1101/2024.09.12.612759	Age-dependent Changes in a Chaperone Complex in the Mouse Heart	I hypothesise that reduced Unc-45b protein levels in aging mouse hearts cause decreased myosin heavy chain protein levels.	I hypothesise that reduced Unc-45b protein levels in aging mouse hearts do not cause decreased myosin heavy chain protein levels.			8	8	8	7	7	1	4	1	5	5
10.1101/2024.09.11.612427	Autophagy across tissues of aging mice	I hypothesise that male mice aged 18 months will have lower autophagic flux in the heart than male mice aged 6 months.	I hypothesise that male mice aged 18 months will not have lower autophagic flux in the heart than male mice aged 6 months.			8	5	9	7	8	9	8	10	5	8
10.1101/2024.08.30.609895	Membrane transporter Progressive Ankylosis Protein Homolog (ANKH/Ank) partially mediates senescence-derived extracellular citrate and is regulated by DNA damage, inflammation and ageing.	I hypothesise that ANKH transporter activity directly correlates with extracellular citrate levels in senescent fibroblasts.	I hypothesise that ANKH transporter activity does not directly correlate with extracellular citrate levels in senescent fibroblasts.			8	8	10	8	7	7	7	1	5	5
10.1101/2023.01.19.524624	Aging reduces motivation through decreased Bdnf expression in the ventral tegmental area	I hypothesise that restoring Bdnf expression in the ventral tegmental area of aged mice will increase their motivation for effortful activities.	I hypothesise that restoring Bdnf expression in the ventral tegmental area of aged mice will not increase their motivation for effortful activities.			8	8	8	7	9	7	8	5	8	1
10.1101/2023.07.04.547676	Severe Osteoarthritis in Aged PANX3 Knockout Mice: Implications for a Novel Primary Osteoarthritis Model	I hypothesise that Panx3 deficiency in aged mice leads to increased inflammatory cytokine expression in synovial tissue.	I hypothesise that Panx3 deficiency in aged mice does not lead to increased inflammatory cytokine expression in synovial tissue.			8	8	8	7	8	1	8	5	5	1
10.1101/2024.02.01.578331	DoliClock: A Lipid-Based Aging Clock Reveals Accelerated Aging in Neurological Disorders	I hypothesise that increased dolichol-19 levels in the prefrontal cortex are associated with accelerated biological aging in individuals with autism.	I hypothesise that increased dolichol-19 levels in the prefrontal cortex are not associated with accelerated biological aging in individuals with autism.			8	8	7	5	8	9	5	5	5	5
10.1101/2024.01.30.577900	Proteasome-dependent Orc6 removal from chromatin upon S-phase entry safeguards against MCM reloading and tetraploidy	I hypothesise that proteasome inhibition in aging cells will increase Orc6 chromatin binding and lead to tetraploidy.	I hypothesise that proteasome inhibition in aging cells will not increase Orc6 chromatin binding and will not lead to tetraploidy.			5	8	7	7	5	7	5	3	5	1
10.1101/2023.06.14.544948	Hexokinase regulates Mondo-mediated longevity via the PPP and organellar dynamics	I hypothesise that hxk-1 knockdown in C. elegans abolishes germline longevity by disrupting mitochondrial beta-oxidation.	I hypothesise that hxk-1 knockdown in C. elegans does not abolish germline longevity and does not disrupt mitochondrial beta-oxidation.			5	5	5	5	7	9	5	1	5	1
10.1101/2022.10.17.512236	Spatiotemporal dynamics of RAD51C between the Golgi and nucleus regulates homologous recombination and genomic stability.	I hypothesise that inhibiting Giantin at the Golgi will increase RAD51C nuclear localization and impair homologous recombination.	I hypothesise that inhibiting Giantin at the Golgi will not increase RAD51C nuclear localization and will not impair homologous recombination.			8	9	8	5	8	7	5	1	5	1
10.1101/2023.10.09.561466	Telomeres control human telomerase (hTERT) expression through non-telomeric TRF2	I hypothesise that increasing telomere length will decrease TRF2 binding to the hTERT promoter.	I hypothesise that increasing telomere length will not decrease TRF2 binding to the hTERT promoter.			5	8	8	8	9	7	3	8	5	1
10.1101/2023.08.13.553128	Age-associated failure of efficient cardiac proteostatic adaptations to chronic cAMP-stress is associated with accelerated heart aging	I hypothesise that chronic cAMP-stress accelerates cardiac aging by impairing proteasome activity in aged mice.	I hypothesise that chronic cAMP-stress does not accelerate cardiac aging and does not impair proteasome activity in aged mice.			8	9	7	1	8	7	2	1	5	10
10.1101/2023.09.19.558536	The association between resting state aperiodic activity and Research Domain Criteria Social Processes in young neurotypical adults	I hypothesise that increased aperiodic exponent in resting state EEG predicts poorer social communication in young adults.	I hypothesise that increased aperiodic exponent in resting state EEG does not predict poorer social communication in young adults.			1	1	7	7	7	7	7	5	5	5
10.1101/2023.08.29.555167	Human Bone Marrow Adipose Tissue is a Hematopoietic Niche for Leptin-DrivenMonopoiesis	I hypothesise that increased bone marrow adipose tissue with age directly correlates with elevated pro-inflammatory monocyte production.	I hypothesise that increased bone marrow adipose tissue with age does not directly correlate with elevated pro-inflammatory monocyte production.			8	8	8	8	5	8	1	5	5	5
10.1101/2023.08.25.554832	Niche-specific macrophage loss promotes skin capillary aging	I hypothesise that restoring capillary-associated macrophage numbers in aged skin will improve capillary blood flow.	I hypothesise that restoring capillary-associated macrophage numbers in aged skin will not improve capillary blood flow.			8	8	8	8	7	9	8	9	8	1
10.1101/2023.08.02.551614	Cellular Senescence Affects ECM Regulation in COPD Lung Tissue	I hypothesise that increased p21 expression in COPD lung fibroblasts directly causes altered ADAMTS1 levels.	I hypothesise that increased p21 expression in COPD lung fibroblasts does not directly cause altered ADAMTS1 levels.			1	8	8	7	9	7	7	5	5	5
10.1101/2023.07.31.551097	Region-Specific Transcriptional Signatures of Brain Aging in the Absence of Neuropathology at the Single-cell Level	I hypothesise that proteostasis gene expression changes in entorhinal cortex neurons are region-specific markers of aging.	I hypothesise that proteostasis gene expression changes in entorhinal cortex neurons are not region-specific markers of aging.			8	10	8	8	8	7	1	5	5	1
10.1101/2025.01.30.635658	Nora virus proliferates in dividing intestinal stem cells and sensitizes flies to intestinal infection and oxidative stress	I hypothesise Nora virus infection accelerates intestinal aging in Drosophila.	I hypothesise that Nora virus infection does not accelerate intestinal aging in Drosophila.			8	9	7	6	8	7	8	5	5	8
10.1101/2025.01.31.635920	AMP-activated protein kinase (AMPK) is essential for tendon homeostasis and prevents premature senescence and ectopic calcification	I hypothesise that AMPK1 deletion in tendon progenitors accelerates cellular senescence and ectopic calcification in tendons.	I hypothesise that AMPK1 deletion in tendon progenitors does not accelerate cellular senescence and ectopic calcification in tendons.			8	8	8	5	8	7	5	2	5	8
10.1101/2023.04.07.536059	New ÃƒÆ’Ã…Â½ÃƒÂ¢Ã¢â€šÂ¬Ã‚Â_x009d_246p53 isoform responds to DNA damage to enhance p53 functions in senescence and tumour suppression	I hypothesise that increased expression of ÃƒÆ’Ã…Â½ÃƒÂ¢Ã¢â€šÂ¬Ã‚Â_x009d_246p53 accelerates cellular senescence following DNA damage.	I hypothesise that increased expression of ÃƒÆ’Ã…Â½ÃƒÂ¢Ã¢â€šÂ¬Ã‚Â_x009d_246p53 does not accelerate cellular senescence following DNA damage.			8	9	9	8	8	8	9	8	5	1
10.1101/2023.03.27.534444	Proteostasis and lysosomal repair deficits in transdifferentiated neurons of Alzheimer's disease	I hypothesise that impaired lysosomal repair mechanisms in aged neurons directly contribute to proteotoxic deposit accumulation.	I hypothesise that impaired lysosomal repair mechanisms in aged neurons do not directly contribute to proteotoxic deposit accumulation.			8	9	8	7	8	9	8	5	5	5
10.1101/2023.03.07.531502	ACRC/GCNA is an essential protease that repairs DNA-protein crosslinks during vertebrate development	I hypothesise that impaired ACRC/GCNA activity accelerates cellular senescence in adult zebrafish tissues.	I hypothesise that impaired ACRC/GCNA activity does not accelerate cellular senescence in adult zebrafish tissues.			5	8	8	7	9	7	7	8	5	5
10.1101/2021.07.11.451986	Chronological lifespan extension and nucleotide salvage inhibition in yeast by isonicotinamide supplementation	I hypothesise that isonicotinamide extends yeast chronological lifespan by inhibiting nucleotide salvage enzymes Sdt1 and Phm8.	I hypothesise that isonicotinamide does not extend yeast chronological lifespan by inhibiting nucleotide salvage enzymes Sdt1 and Phm8.			8	10	8	1	8	7	8	1	5	1
10.1101/789065	Indian Wellderly exomes underscore NRAP roles in elderly hypertrophic cardiomyopathy	I hypothesise that NRAP variants identified in the Indian Wellderly cohort cause hypertrophic cardiomyopathy by reducing interactions with KLHL41.	I hypothesise that NRAP variants identified in the Indian Wellderly cohort do not cause hypertrophic cardiomyopathy by reducing interactions with KLHL41.			8	8	7	7	7	7	7	5	5	1
10.1101/2024.09.10.612283	Multi-ancestry GWAS reveals loci linked to human variation in LINE-1- and Alu-insertion numbers	I hypothesise that increased LINE-1 or Alu element activity is associated with cellular senescence.	I hypothesise that increased LINE-1 or Alu element activity is not associated with cellular senescence.			8	8	8	7	8	8	8	5	5	1
10.1101/2024.08.19.608305	An estimate of the longitudinal pace of aging from a single brain scan predicts dementia conversion, morbidity, and mortality	I hypothesise that a faster DunedinPACNI score will predict increased cellular senescence markers in peripheral blood.	I hypothesise that a faster DunedinPACNI score will not predict increased cellular senescence markers in peripheral blood.			5	8	1	10	8	9	8	1	8	1
10.1101/2024.08.04.606499	Computational model for synthesizing auditory brainstem responses to assess neuronal alterations in aging and autistic animal models	I hypothesise that myelin deficits in the auditory brainstem cause decreased wave III amplitude and prolonged wave III-V interval in aging animals.	I hypothesise that myelin deficits in the auditory brainstem do not cause decreased wave III amplitude and prolonged wave III-V interval in aging animals.			5	8	8	7	7	7	9	5	5	1
10.1101/2024.10.21.619562	The spatio-temporal dynamics of phoneme encoding in aging and aphasia	I hypothesise that healthy older adults maintain phonetic encoding longer than individuals with aphasia when word identity is uncertain.	I hypothesise that healthy older adults do not maintain phonetic encoding longer than individuals with aphasia when word identity is uncertain.			5	1	8	7	9	8	7	7	5	5
10.1101/2024.07.06.602307	Improvement of human donor retinal ganglion cell survival through modulation of microglia	I hypothesise that annexin V pretreatment of donor retinal ganglion cells increases their survival in host retinas.	I hypothesise that annexin V pretreatment of donor retinal ganglion cells does not increase their survival in host retinas.			8	8	8	5	8	7	8	1	7	1
10.1101/2024.07.05.601643	SOX21 Suppresses Glioblastoma Growth by Repressing AP-1 Activity	I hypothesise that SOX21 expression induces cellular senescence in glioblastoma stem cells.	I hypothesise that SOX21 expression does not induce cellular senescence in glioblastoma stem cells.			8	8	7	10	7	7	10	9	5	8
10.1101/2024.06.22.600215	Exosomes Released from Senescent Cells and Circulatory Exosomes Isolated from Human Plasma Reveal Aging-associated Proteomic and Lipid Signatures	I hypothesise that increased levels of SERPINs in plasma exosomes correlate with cellular senescence burden in older individuals.	I hypothesise that increased levels of SERPINs in plasma exosomes do not correlate with cellular senescence burden in older individuals.			5	8	8	5	7	10	7	5	5	1
10.1101/2024.06.17.598893	The GTPase-activating protein CG42795 is a potent neuronal regulator of ageing in Drosophila melanogaster	I hypothesise that neuronal silencing of CG42795 in Drosophila melanogaster enhances autophagy.	I hypothesise that neuronal silencing of CG42795 in Drosophila melanogaster does not enhance autophagy.			9	8	10	10	8	8	5	1	5	1
10.1101/2024.06.15.599168	Changes in Higuchi's fractal dimension across age in healthy human EEG are anti-correlated with changes in oscillatory power and 1/f slope	I hypothesise that increased Higuchi's fractal dimension in human EEG with age is inversely correlated with the 1/f slope of the power spectral density.	I hypothesise that increased Higuchi's fractal dimension in human EEG with age is not inversely correlated with the 1/f slope of the power spectral density.			1	1	7	10	9	8	2	7	5	5
10.1101/2024.06.14.599109	Functional Hierarchy of the Human Neocortex from Cradle to Grave	I hypothesise that the decrease in global gradient measures of FC differentiation and complexity from 30 to 100 years is associated with cellular senescence in neocortical neurons.	I hypothesise that the decrease in global gradient measures of FC differentiation and complexity from 30 to 100 years is not associated with cellular senescence in neocortical neurons.			8	8	9	7	8	9	8	5	5	1
10.1101/2024.06.13.598792	Electrophysiology and Morphology of Human Cortical Supragranular Pyramidal Cells in a Wide Age Range	I hypothesise that supragranular pyramidal cells become less excitable with age after early development.	I hypothesise that supragranular pyramidal cells do not become less excitable with age after early development.			5	8	8	9	7	8	7	9	5	8
10.1101/2024.06.12.598646	A mechanism for telomere-specific telomere length regulation	I hypothesise that increased Sir4 abundance on subtelomeric heterochromatin directly causes telomere-specific set-length maintenance.	I hypothesise that increased Sir4 abundance on subtelomeric heterochromatin does not directly cause telomere-specific set-length maintenance.			8	8	7	7	9	7	8	5	5	5
10.1101/2024.06.10.598273	Genetic and Environmental Contributions to Epigenetic Aging Across Adolescence and Young Adulthood	I hypothesise that unique environmental factors explain more variance in epigenetic aging in older young adults than in adolescents.	I hypothesise that unique environmental factors do not explain more variance in epigenetic aging in older young adults than in adolescents.			5	5	8	7	9	7	8	7	5	1
10.1101/2024.09.11.611691	Lack of cortistatin exacerbates neuroimmune and vascular dysfunction in ischemic stroke	I hypothesise that cortistatin deficiency accelerates age-related vascular dysfunction after ischemic stroke.	I hypothesise that cortistatin deficiency does not accelerate age-related vascular dysfunction after ischemic stroke.			5	8	8	5	7	9	8	2	5	5
10.1101/2024.09.13.612812	The SET1/COMPASS subunit RBBP5 orchestrates epigenetic control of global proteostasis and the 12h oscillator to safeguard metabolic and cellular homeostasis	I hypothesise that RBBP5 deficiency accelerates cellular senescence in mammalian cells.	I hypothesise that RBBP5 deficiency does not accelerate cellular senescence in mammalian cells.			8	8	8	9	8	7	8	1	5	8
10.1101/2024.10.14.616343	Perivascular and parenchymal fluid characteristics are related to age and cognitive performance across the lifespan	I hypothesise that increased perivascular free water diffusion is associated with poorer cognitive performance in aging adults.	I hypothesise that increased perivascular free water diffusion is not associated with poorer cognitive performance in aging adults.			5	10	8	8	7	7	9	1	5	5
10.1101/2024.10.11.617862	Therapeutic effects of PDGF-AB/BB against cellular senescence in human intervertebral disc	I hypothesise PDGF-AB/BB treatment reduces SA-ÃƒÆ’Ã…Â½Ãƒâ€šÃ‚Â²-Gal activity in senescent human intervertebral disc cells.	I hypothesise that PDGF-AB/BB treatment does not reduce SA-ÃƒÆ’Ã…Â½Ãƒâ€šÃ‚Â²-Gal activity in senescent human intervertebral disc cells.			8	8	7	7	8	5	8	9	5	5
10.1101/2024.09.28.615585	Tracing Cellular Senescence in Bone: Time-Dependent Changes in Osteocyte Cytoskeleton Mechanics and Morphology	I hypothesise that increased F-actin area in osteocytes directly correlates with increased cytoskeletal stiffening.	I hypothesise that increased F-actin area in osteocytes does not directly correlate with increased cytoskeletal stiffening.			8	8	7	7	7	7	8	5	7	5
10.1101/2024.09.14.613007	A redox switch in p21-CDK feedback during G2 phase controls the proliferation-cell cycle exit decision	I hypothesise that p21 C41 oxidation promotes cell cycle exit and senescence after irradiation.	I hypothesise that p21 C41 oxidation does not promote cell cycle exit and senescence after irradiation.			5	9	10	10	8	8	8	1	5	1
10.1101/2024.11.15.623304	Oncogene-induced senescence and senescence-associated secretory phenotype (SASP) determine the efficacy of palbociclib in PIK3CA mutated colorectal cancer	I hypothesise that PIK3CA-mutant colorectal cancer cells exhibit increased oncogene-induced senescence compared to PIK3CA wild-type cells.	I hypothesise that PIK3CA-mutant colorectal cancer cells do not exhibit increased oncogene-induced senescence compared to PIK3CA wild-type cells.			5	8	8	8	5	7	8	5	5	1
10.1101/2024.11.14.623694	Tissue-specific responses to TFAM and mtDNA copy number manipulation in prematurely ageing mice	I hypothesise that moderate TFAM overexpression improves brown adipocyte tissue homeostasis in mtDNA mutator mice.	I hypothesise that moderate TFAM overexpression does not improve brown adipocyte tissue homeostasis in mtDNA mutator mice.			8	8	8	5	7	8	8	5	8	5
10.1101/2024.11.14.623513	Telomeric Repeat-Containing RNA Increases in Aged Human Cells	I hypothesise that increased TERRA levels in aged human cells contribute to cellular senescence.	I hypothesise that increased TERRA levels in aged human cells do not contribute to cellular senescence.			5	8	10	9	8	8	7	5	5	1
10.1101/2024.11.07.622548	Pathological tau alters head direction signaling and induces spatial disorientation	I hypothesise that pathological tau in the anterodorsal thalamic nucleus reduces head direction cell firing rate.	I hypothesise that pathological tau in the anterodorsal thalamic nucleus does not reduce head direction cell firing rate.			1	1	9	7	7	8	7	7	5	5
10.1101/2024.10.31.621394	Dissociation of the nuclear basket triggers chromosome loss in aging yeast	I hypothesise that nuclear basket displacement from NPCs directly causes chromosome loss in aging yeast.	I hypothesise that nuclear basket displacement from NPCs does not directly cause chromosome loss in aging yeast.			8	8	7	7	8	8	7	5	1	1
10.1101/2024.10.30.621201	Deficiency of mitophagy mediator Parkin in aortic smooth muscle cells exacerbates abdominal aortic aneurysm	I hypothesise that Parkin deficiency in aortic smooth muscle cells directly causes abdominal aortic aneurysm dilation.	I hypothesise that Parkin deficiency in aortic smooth muscle cells does not directly cause abdominal aortic aneurysm dilation.			8	8	7	10	9	7	5	5	5	1
10.1101/2024.10.27.620431	The EGFR ligand amphiregulin regulates genomic integrity by facilitating heterochromatin formation in response to replication stress	I hypothesise that amphiregulin nuclear localization is required for heterochromatin maintenance in response to replication stress.	I hypothesise that amphiregulin nuclear localization is not required for heterochromatin maintenance in response to replication stress.			5	8	5	7	5	9	1	1	8	8
10.1101/2024.10.22.619524	Loss of Tonoplast Sucrose Transporter SUT4 Alters Seasonal Growth, Carbohydrate Allocation, and Fertility in Field-Grown Poplar	I hypothesise that SUT4 loss-of-function in poplar leads to premature autumn leaf senescence due to impaired vacuolar sucrose efflux.	I hypothesise that SUT4 loss-of-function in poplar does not lead to premature autumn leaf senescence due to impaired vacuolar sucrose efflux.			8	8	8	8	8	9	8	7	5	1
10.1101/2024.12.20.629759	The brain cortical similarity network: Development and sensitivity to early life stress in a rat model	I hypothesise early life stress reverses normative fronto-hippocampal similarity convergence during development.	I hypothesise that early life stress does not reverse normative fronto-hippocampal similarity convergence during development.			8	8	8	7	5	8	8	7	5	1
10.1101/2024.12.18.629088	Constructing the first comorbidity networks in companion dogs in the Dog Aging Project	I hypothesise that older dogs exhibit a higher number of co-occurring morbidities than younger dogs.	I hypothesise that older dogs do not exhibit a higher number of co-occurring morbidities than younger dogs.			1	1	9	7	7	8	9	9	5	1
10.1101/2024.12.13.627515	Characterization of DNA methylation in PBMCs and donor-matched iPSCs shows methylation is reset during stem cell reprogramming	I hypothesise that reprogramming PBMCs to iPSCs resets age-related DNA methylation patterns.	I hypothesise that reprogramming PBMCs to iPSCs does not reset age-related DNA methylation patterns.			9	9	8	8	10	8	7	7	5	5
10.1101/2024.12.11.627965	Food-Derived Compounds Extend the Shelf-Life of Frozen Human Milk	I hypothesise that adding specific food-derived compounds to frozen human milk will prevent fat degradation.	I hypothesise that adding specific food-derived compounds to frozen human milk will not prevent fat degradation.			5	8	5	7	7	7	8	9	5	5
10.1101/2024.12.10.627727	Age-Related Patterns of DNA Methylation Changes	I hypothesise that non-linear methylation trajectories identified after age 65 are associated with accelerated cellular senescence.	I hypothesise that non-linear methylation trajectories identified after age 65 are not associated with accelerated cellular senescence.			8	8	7	7	5	7	8	8	5	1
10.1101/2024.12.03.626661	Comparing Intra- and Inter-individual Correlational Brain Connectivity from Functional and Structural Neuroimaging Data	I hypothesise that aging primarily drives intra-individual gray matter volume correlations in the brain.	I hypothesise that aging does not primarily drive intra-individual gray matter volume correlations in the brain.			8	9	8	8	9	8	9	8	1	1
10.1101/2024.12.03.626516	Tabula Sapiens reveals transcription factor expression, senescence effects, and sex-specific features in cell types from 28 human organs and tissues	I hypothesise that senescent cells in the liver exhibit distinct transcription factor expression profiles compared to senescent cells in the lungs.	I hypothesise that senescent cells in the liver do not exhibit distinct transcription factor expression profiles compared to senescent cells in the lungs.			8	8	8	7	7	7	8	1	5	1
10.1101/2024.12.02.625632	Mapping the canine microbiome: Insights from the Dog Aging Project	I hypothesise that specific gut microbial taxa abundance in dogs correlates with their biological age as measured by the DAP microbiome clock.	I hypothesise that specific gut microbial taxa abundance in dogs does not correlate with their biological age as measured by the DAP microbiome clock.			1	8	7	5	7	1	8	5	5	5
10.1101/2024.11.27.625794	Sex differences in the rates and association of cerebral blood flow and glucose metabolism in normative ageing.	I hypothesise that older females exhibit a stronger negative correlation between cerebral blood flow and glucose metabolism than older males.	I hypothesise that older females do not exhibit a stronger negative correlation between cerebral blood flow and glucose metabolism than older males.			8	8	7	8	8	7	8	5	5	5
10.1101/2024.11.27.625711	Enalapril mitigates senescence and aging-related phenotypes by targeting antioxidative genes via phosphorylated Smad1/5/9	I hypothesise enalapril treatment reduces senescence markers in aged cells by increasing antioxidative gene expression.	I hypothesise that enalapril treatment does not reduce senescence markers in aged cells by increasing antioxidative gene expression.			5	8	9	1	9	9	8	5	7	1
10.1101/2024.11.22.624885	Alterations in Circulating T-Cell Subsets with Gut-Homing/Residency Phenotypes Predict HIV-1 Status and Subclinical Atherosclerosis	I hypothesise that increased frequency of CD326+CD69+CCR6+ItgE+ CD4+ T-cells predicts higher coronary atherosclerotic plaque volume.	I hypothesise that increased frequency of CD326+CD69+CCR6+ItgE+ CD4+ T-cells does not predict higher coronary atherosclerotic plaque volume.			5	8	6	7	8	7	7	5	5	5
10.1101/2024.12.27.630526	Impaired axon regeneration and heightened synaptic dynamics in the injured aged mammalian cortex	I hypothesise that aged mice exhibit significantly reduced axon regrowth after injury compared to young adult mice.	I hypothesise that aged mice do not exhibit significantly reduced axon regrowth after injury compared to young adult mice.			8	8	9	7	9	7	9	5	8	8
10.1101/2024.12.27.630538	The Arp2/3 complex maintains genome integrity and survival of epidermal Langerhans cells	I hypothesise Arp2/3 complex deficiency accelerates epidermal Langerhans cell aging by increasing DNA damage.	I hypothesise that Arp2/3 complex deficiency does not accelerate epidermal Langerhans cell aging by increasing DNA damage.			8	8	8	7	5	5	5	5	5	9
10.1101/2024.12.21.629509	The biophysical mechanism of mitochondrial pearling	I hypothesise that increased internal pressure from ionic flux drives mitochondrial pearling in senescent T-cells.	I hypothesise that increased internal pressure from ionic flux does not drive mitochondrial pearling in senescent T-cells.			8	8	7	5	8	9	8	1	5	1
10.1101/2024.12.21.629084	Age-related Increase in Locus Coeruleus Activity and Connectivity with Prefrontal Cortex during Ambiguity Processing	I hypothesise that reduced locus coeruleus activity in older adults correlates with decreased ability to process ambiguous facial expressions.	I hypothesise that reduced locus coeruleus activity in older adults does not correlate with decreased ability to process ambiguous facial expressions.			7	8	8	5	8	8	8	5	5	5
10.1101/2025.08.31.673173	Germline stem cell isolation, lineage tracing, and aging in a protochordate	I hypothesise that reduced DDX4 expression in aged Botryllus schlosseri GSCs directly impairs their self-renewal capacity.	I hypothesise that reduced DDX4 expression in aged Botryllus schlosseri GSCs does not directly impair their self-renewal capacity.			8	9	8	8	7	7	7	5	5	5
10.1101/2025.08.26.672402	Toward Robust Neuroanatomical Normative Models: Influence of Sample Size and Covariates Distributions	I hypothesise that increasing reference sample size for neuroimaging normative models improves deviation estimation accuracy in aging individuals.	I hypothesise that increasing reference sample size for neuroimaging normative models does not improve deviation estimation accuracy in aging individuals.			7	8	9	7	7	7	9	5	8	5
10.1101/2025.08.19.671148	N-acetylcarnosine attenuates age-associated declines in multi-organ systems to improve survival	I hypothesise N-acetylcarnosine treatment extends lifespan in female mice by attenuating age-associated declines in adiposity and diastolic function.	I hypothesise that N-acetylcarnosine treatment does not extend lifespan in female mice by failing to attenuate age-associated declines in adiposity and diastolic function.			8	8	8	7	7	8	8	4	8	1
10.1101/2025.08.12.669858	Circular continuum of alpha motoneuron types	I hypothesise that the S/FF alpha-motoneuron subtype exhibits increased resistance to age-related degeneration compared to S or FF subtypes.	I hypothesise that the S/FF alpha-motoneuron subtype does not exhibit increased resistance to age-related degeneration compared to S or FF subtypes.			5	10	10	5	8	7	7	5	5	5
10.1101/2025.08.08.668946	MechanoAge, a machine learning platform to identify individuals susceptible to breast cancer based on mechanical properties of single cells	I hypothesise that elevated mechano-RISQ scores in mammary epithelial cells predict increased breast cancer incidence in women without known genetic mutations.	I hypothesise that elevated mechano-RISQ scores in mammary epithelial cells do not predict increased breast cancer incidence in women without known genetic mutations.			5	8	7	7	8	1	8	5	5	5
10.1101/2025.08.05.668798	Time-Resolved Transcriptomics Reveal Spliceosomal Disruption and Senescence Pathways in Crocin-Treated Hepatocellular Carcinoma Cells	I hypothesise that crocin treatment induces cellular senescence in hepatocellular carcinoma cells by downregulating spliceosomal machinery genes.	I hypothesise that crocin treatment does not induce cellular senescence in hepatocellular carcinoma cells by downregulating spliceosomal machinery genes.			8	1	7	1	7	8	10	10	5	1
10.1101/2025.08.05.668696	AT-HOOK-MOTIF NUCLEAR LOCALIZED 15 extends plant longevity by binding at poorly accessible, epigenetic mark-depleted chromatin that surrounds transcribed regions	I hypothesise AHL15 represses aging-related genes by binding near their transcription start sites.	I hypothesise that AHL15 does not repress aging-related genes by binding near their transcription start sites.			1	1	8	8	8	9	7	1	5	1
10.1101/2025.07.31.667922	Integrative Analysis of the Mouse Cecal Microbiome Across Diet, Age, and Metabolic State in the Diverse BXD Population	I hypothesise that Lachnospiraceae abundance is negatively correlated with host Ido1 expression in the cecum.	I hypothesise that Lachnospiraceae abundance is not negatively correlated with host Ido1 expression in the cecum.			8	8	8	8	8	7	8	5	5	1
10.1101/2025.07.28.667224	Pharmacologic activation of ÃƒÆ’Ã…Â½ÃƒÂ¢Ã¢â€šÂ¬Ã‚Â_x009d_133p53ÃƒÆ’Ã…Â½Ãƒâ€šÃ‚Â± reduces cellular senescence in progeria patients-derived cells	I hypothesise that celastrol treatment reduces SA-beta-gal positive cells in HGPS fibroblasts.	I hypothesise that celastrol treatment does not reduce SA-beta-gal positive cells in HGPS fibroblasts.			5	8	8	7	9	8	7	9	1	1
10.1101/2025.07.27.667059	Aging-enhanced accumulation of fibroblasts excludes oligodendrocytes in demyelinated lesions	I hypothesise that increased fibroblast accumulation in aging demyelinated lesions directly inhibits oligodendrocyte precursor cell (OPC) differentiation.	I hypothesise that increased fibroblast accumulation in aging demyelinated lesions does not directly inhibit oligodendrocyte precursor cell (OPC) differentiation.			8	8	8	8	5	9	8	7	5	5
10.1101/2025.07.25.666857	Concurrent presentation of memory-related odors and sounds nullified sleep reactivation benefits	I hypothesise that concurrent odor presentation during sleep disrupts sound-induced spatial memory reactivation.	I hypothesise that concurrent odor presentation during sleep does not disrupt sound-induced spatial memory reactivation.			8	5	8	8	7	7	7	8	5	8
10.1101/2025.01.09.632092	Aggregation of HAPLN2, a component of the perinodal extracellular matrix, is a hallmark of physiological brain aging in mice	I hypothesise that reducing HAPLN2 aggregation will decrease microglial inflammatory responses in aged mouse brains.	I hypothesise that reducing HAPLN2 aggregation will not decrease microglial inflammatory responses in aged mouse brains.			7	8	1	7	9	7	8	5	8	1
10.1101/2024.06.04.597306	Altered dynamics of ATP synthase cause functional irregularities in senescent hiPS-cardiomyocytes	I hypothesise that reduced ATP synthase mobility in senescent cardiomyocytes directly impairs ATP production.	I hypothesise that reduced ATP synthase mobility in senescent cardiomyocytes does not directly impair ATP production.			8	8	9	7	8	9	5	8	5	5
10.1101/2024.06.04.596782	Pathogenicity of Commensal Gut Biofilm In Prefrail Aging	I hypothesise that prefrail-derived gut biofilms exhibit increased epithelial cell damage compared to robust biofilms.	I hypothesise that prefrail-derived gut biofilms do not exhibit increased epithelial cell damage compared to robust biofilms.			8	8	8	8	8	8	7	5	5	5
10.1101/2024.06.03.592804	Reliability of structural brain change in cognitively healthy adult samples.	I hypothesise that younger adults exhibit lower reliability of structural brain change than older adults.	I hypothesise that younger adults do not exhibit lower reliability of structural brain change than older adults.			1	9	8	10	7	7	7	8	5	8
10.1101/2024.05.23.595504	Human hypothalamic neural stem cells transplantation ameliorates age-associated dysfunction through SNS/eNAMPT axis activation in aged mice	I hypothesise that human hypothalamic neural stem cell transplantation in aged mice increases systemic eNAMPT levels.	I hypothesise that human hypothalamic neural stem cell transplantation in aged mice does not increase systemic eNAMPT levels.			5	10	7	8	5	8	5	1	8	1
10.1101/2024.05.17.594606	Scalable Screening of Ternary-Code DNA methylation Dynamics Associated with Human Traits.	I hypothesise that increased 5hmC levels in specific tissues correlate with slower biological aging.	I hypothesise that increased 5hmC levels in specific tissues do not correlate with slower biological aging.			8	7	7	8	9	10	8	5	7	1
10.1101/2024.05.14.594256	Inhibition of mTORC1 by rapamycin results in feedback activation of Akt S473 and aggravates hallmarks of osteoarthritis in female mice and non-human primates	I hypothesise that rapamycin treatment exacerbates osteoarthritis in female mice by increasing meniscus calcification.	I hypothesise that rapamycin treatment does not exacerbate osteoarthritis in female mice by decreasing meniscus calcification.			8	7	7	7	8	8	5	7	5	8
10.1101/2024.05.13.593984	Effects of focal epilepsy and aging on discrimination and reactivation of memories	I hypothesise that aging specifically impairs pattern separation ability in healthy individuals.	I hypothesise that aging does not specifically impair pattern separation ability in healthy individuals.			5	8	9	10	8	8	8	9	5	5
10.1101/2024.05.07.592982	Survival, Movement, and Lifespan: Decoding the Roles of Patched-Related (Ptr) in Drosophila melanogaster	I hypothesise that Ptr23c loss-of-function causes increased somatic muscle nuclear size.	I hypothesise that Ptr23c loss-of-function does not cause increased somatic muscle nuclear size.			5	8	8	10	9	8	5	10	1	1
10.1101/2024.05.03.592475	Estropausal gut microbiota transplant improves measures of ovarian function in adult mice	I hypothesise that estropausal gut microbiota transplantation restores ovarian gene expression profiles towards a younger state in adult mice.	I hypothesise that estropausal gut microbiota transplantation does not restore ovarian gene expression profiles towards a younger state in adult mice.			5	8	8	7	8	9	5	5	5	5
10.1101/2025.07.08.663701	Deep mapping of the endomembrane system of cerebellar Purkinje neurons	I hypothesise that altered ER-mitochondria contact sites in Purkinje neurons contribute to age-related decline in cerebellar function.	I hypothesise that altered ER-mitochondria contact sites in Purkinje neurons do not contribute to age-related decline in cerebellar function.			5	10	9	10	7	8	2	5	5	1
10.1101/2025.06.30.660585	Reporting quality, effect sizes, and biases for aging interventions: a methodological appraisal of the DrugAge database	I hypothesise that randomization and blinding are underreported in preclinical aging intervention studies.	I hypothesise that randomization and blinding are overreported in preclinical aging intervention studies.			8	5	9	8	8	8	7	7	5	1
10.1101/2025.06.26.661690	Altered Brain Energy Metabolism in the APPPS1 Alzheimer's Model during anesthesia: Integration of Experimental Data and In Silico Modeling	I hypothesise that APPPS1 mice exhibit reduced ATP generation capacity compared to wild-type mice.	I hypothesise that APPPS1 mice do not exhibit reduced ATP generation capacity compared to wild-type mice.			8	9	9	7	7	8	1	7	5	10
10.1101/2025.06.24.661372	Deep and Quantitative Proteomic Profiling of Low Volume Mouse Serum Across the Lifespan	I hypothesise that specific serum protein levels change predictably with age in mice.	I hypothesise that specific serum protein levels do not change predictably with age in mice.			5	8	9	8	7	9	9	5	5	1
10.1101/2025.06.24.661261	Microbiome variations in osteoarthritis reflect aging and metabolic factors, not the disease	I hypothesise that increased age is associated with specific gut microbiome alterations in individuals with osteoarthritis.	I hypothesise that increased age is not associated with specific gut microbiome alterations in individuals with osteoarthritis.			8	8	8	5	9	7	9	1	5	5
10.1101/2025.06.18.660440	TNF-ÃƒÆ’Ã…Â½Ãƒâ€šÃ‚Â±-induces type I IFN signalling to suppress neurogenesis and recruit T cells	I hypothesise TNF-ÃƒÆ’Ã…Â½Ãƒâ€šÃ‚Â± signalling directly suppresses human hippocampal progenitor cell neurogenesis.	I hypothesise that TNF-ÃŽÂ± signalling does not directly suppress human hippocampal progenitor cell neurogenesis.			8	8	9	9	8	7	8	7	5	1
10.1101/2025.01.09.632269	Age-related differences in the impact of background noise on neural speech tracking	I hypothesise that older adults exhibit higher baseline neural speech tracking than younger adults in quiet conditions.	I hypothesise that older adults do not exhibit higher baseline neural speech tracking than younger adults in quiet conditions.			1	8	7	9	9	9	5	3	8	5
10.1101/2025.01.10.632375	Seeking rhythmic patterns in microglial cells within the circadian pineal gland from male rats	I hypothesise that aged pineal microglia exhibit reduced phagocytic capacity compared to young pineal microglia at ZT18.	I hypothesise that aged pineal microglia do not exhibit reduced phagocytic capacity compared to young pineal microglia at ZT18.			5	5	9	5	8	8	8	5	5	1
10.1101/2025.06.18.660418	Preserved cerebellar functions despite structural degeneration in older adults	I hypothesise that older adults with cerebellar degeneration will perform equally well on cerebellar-specific motor tasks as younger adults.	I hypothesise that older adults with cerebellar degeneration will not perform equally well on cerebellar-specific motor tasks as younger adults.			1	8	2	9	9	9	6	9	5	5
10.1101/2025.06.11.659200	Aging murine peritoneal macrophages undergo female-specific remodeling driven by hormone-dependent and independent mechanisms	I hypothesise that reducing estrogen levels in aged female mice will reverse their phagocytic decline in peritoneal macrophages.	I hypothesise that reducing estrogen levels in aged female mice will not reverse their phagocytic decline in peritoneal macrophages.			7	5	7	7	9	7	7	5	8	1
10.1101/2025.06.10.657597	Napping alters Functional Brain Responses in the Aged	I hypothesise that napping in older adults is associated with reduced DLPFC hemispheric asymmetry during a working memory task.	I hypothesise that napping in older adults is not associated with reduced DLPFC hemispheric asymmetry during a working memory task.			5	1	9	8	7	8	8	7	5	5
10.1101/2025.06.07.658373	Brain FGF2 and NCAM1 contribute to FGFR1-dependent progression of ER+ breast cancer brain metastases in young and aged hosts	I hypothesise that inhibiting FGFR1 will reduce ER+ breast cancer brain metastasis progression in young mice.	I hypothesise that inhibiting FGFR1 will not reduce ER+ breast cancer brain metastasis progression in young mice.			9	9	7	5	7	7	8	5	7	1
10.1101/2025.05.27.656359	Reduced susceptibility to experimentally-induced complex visual hallucinations with age	I hypothesise that older adults report fewer complex visual hallucinations than younger adults under experimental conditions.	I hypothesise that older adults report more complex visual hallucinations than younger adults under experimental conditions.			1	1	8	9	7	8	5	7	5	5
10.1101/2025.05.26.655710	Distinguishing Lifelong Individual Differences from Divergent Aging Trajectories of Adult Brain Volumes	I hypothesise that stable individual differences in brain structure volumes before age 60 are primarily determined by early adulthood levels, not aging trajectories.	I hypothesise that stable individual differences in brain structure volumes before age 60 are not primarily determined by early adulthood levels, but rather by aging trajectories.			8	8	8	8	8	8	8	8	1	5
10.1101/2025.05.22.655607	Age-dependent gut microbiota dynamics and their association with male fitness traits in Drosophila melanogaster	I hypothesise that increased abundance of Acetobacter ascendens in young male Drosophila melanogaster is associated with accelerated physiological aging.	I hypothesise that increased abundance of Acetobacter ascendens in young male Drosophila melanogaster is not associated with accelerated physiological aging.			1	1	8	5	8	7	8	5	5	5
10.1101/2025.05.19.654996	Disturbed engram network caused by NPTXs downregulation underlies aging-related memory deficits	I hypothesise that NPTX1 downregulation in aged mice causes memory deficits by increasing Fos+ ensemble hyperexcitability.	I hypothesise that NPTX1 downregulation in aged mice doesnot cause memory deficits by increasing Fos+ ensemble hyperexcitability.			8	5	8	5	7	10	8	7	5	1
10.1101/2025.05.20.655226	Youth-associated protein TIMP2 alters microglial state and function in the context of aging	I hypothesise that TIMP2 deficiency exacerbates age-related microglial inflammation and impairs debris clearance in the aged brain.	I hypothesise that TIMP2 deficiency does not exacerbate age-related microglial inflammation and does not impair debris clearance in the aged brain.			8	8	9	1	8	9	8	8	7	5
10.1101/2025.05.19.654918	Dysregulation of alternative splicing patterns in the ovaries of reproductively aged mice	I hypothesise that increased exon skipping in Ndufs4 in aged mouse ovaries impairs mitochondrial Complex I function.	I hypothesise that increased exon skipping in Ndufs4 in aged mouse ovaries does not impair mitochondrial Complex I function.			5	7	8	7	8	9	5	5	5	8
10.1101/2025.01.14.633043	Altered Relaxation and Mitochondria-Endoplasmic Reticulum Contact Sites Precede Major (Mal)adaptations in Aging Skeletal Muscle and are Prevented by Exercise	I hypothesise that altered MERC ultrastructure precedes sarcopenia onset in aging skeletal muscle.	I hypothesise that altered MERC ultrastructure does not precede sarcopenia onset in aging skeletal muscle.			8	8	8	7	9	7	8	6	5	1
10.1101/2025.01.10.632413	Bypassing cisplatin resistance in Nrf2 hyperactivated head and neck cancer through effective PI3Kinase targeting	I hypothesise that PI3K inhibition with gedatolisib will re-sensitize cisplatin-resistant HNSCC cells to cisplatin by inducing senescence.	I hypothesise that PI3K inhibition with gedatolisib will not re-sensitize cisplatin-resistant HNSCC cells to cisplatin by inducing senescence.			8	9	8	7	8	7	5	5	8	1
10.1101/2025.05.14.653957	The relationship between task-related aperiodic EEG activity, neural inefficiency and verbal working memory in younger and older adults	I hypothesise that older adults exhibit a flatter aperiodic exponent during verbal working memory retention compared to younger adults.	I hypothesise that older adults do not exhibit a flatter aperiodic exponent during verbal working memory retention compared to younger adults.			1	10	8	7	7	8	7	1	8	1
10.1101/2025.05.13.653906	An approach to differentiating biological from chemical sulfide oxidation on corroded concrete sewer surfaces	I hypothesise that increasing H2S concentration above 300 ppm will shift sulfide oxidation dominance from biological to chemical processes in corroded concrete.	I hypothesise that increasing H2S concentration above 300 ppm will not shift sulfide oxidation dominance from biological to chemical processes in corroded concrete.			8	8	8	8	7	8	5	9	5	8
10.1101/2025.05.07.652530	RNA Pol I activity is required for meiotic chromatin organization and the H3K4me3 gradient essential for oogenesis, independent of ribosome synthesis	I hypothesise that impaired RNA Pol I activity in aging oocytes leads to reduced fertility due to disrupted H3K4me3 gradients.	I hypothesise that impaired RNA Pol I activity in aging oocytes does not lead to reduced fertility and does not disrupt H3K4me3 gradients.			8	8	9	8	7	8	7	7	5	5
10.1101/2025.05.06.652460	Acute E2/P4 loss compromises the biology and function of neurogenic niches during a vulnerable female aging period	I hypothesise that E2/P4 loss at 9 months of age in female rats significantly reduces NSPC proliferation compared to intact rats.	I hypothesise that E2/P4 loss at 9 months of age in female rats does not significantly reduce NSPC proliferation compared to intact rats.			5	8	8	8	8	8	7	8	5	5
10.1101/2025.05.05.652255	Isoswitching drives the aging process in human brains	I hypothesise that increased isoswitching in DLPFC correlates with cognitive decline in aging humans.	I hypothesise that increased isoswitching in DLPFC does not correlate with cognitive decline in aging humans.			5	8	8	7	9	7	7	5	5	5
10.1101/2025.05.08.652953	White matter microstructure and macrostructure brain charts across the human lifespan	I hypothesise that specific white matter pathways show accelerated microstructural decline with age in individuals with neurological disorders compared to healthy controls.	I hypothesise that specific white matter pathways do not show accelerated microstructural decline with age in individuals with neurological disorders compared to healthy controls.			8	10	9	8	7	7	10	7	8	5
10.1101/2025.05.01.651651	Age-related declines in niche self-renewal factors controls testis aging and spermatogonial stem cell competition through Hairless, Imp, and Chinmo	I hypothesise that increasing BMP levels in the Drosophila testis niche reverses age-related GSC loss.	I hypothesise that increasing BMP levels in the Drosophila testis niche does not reverse age-related GSC loss.			5	8	8	7	5	8	2	5	7	1
10.1101/2025.04.24.650484	Fluphenazine, an antipsychotic compound, ameliorates Alzheimer's disease by clearing amyloid beta accumulation in C. elegans	I hypothesise fluphenazine reduces amyloid-beta accumulation in aged C. elegans.	I hypothesise that fluphenazine does not reduce amyloid-beta accumulation in aged C. elegans.			8	8	8	5	7	8	8	1	5	1
10.1101/2025.04.21.649585	Single-Cell Epigenomics Uncovers Heterochromatin Instability and Transcription Factor Dysfunction during Mouse Brain Aging	I hypothesise that increased H3K9me3 domain accessibility in glutamatergic neurons directly correlates with AP-1 transcription factor activity in aged mice.	I hypothesise that increased H3K9me3 domain accessibility in glutamatergic neurons does not directly correlate with AP-1 transcription factor activity in aged mice.			1	8	6	7	7	9	7	5	5	5
10.1101/2025.04.15.648983	A non-invasive method for profiling the gut microbiome and virome of honey bee queens	I hypothesise that a dysbiotic gut microbiome in queen honey bees is associated with reduced longevity.	I hypothesise that a dysbiotic gut microbiome in queen honey bees is not associated with reduced longevity.			8	10	7	7	8	7	8	9	5	5
10.1101/2025.04.09.647991	The mitochondrial NAD transporter SLC25A51 is a modulator of beta cell senescence and type 2 diabetes	I hypothesise that SLC25A51 overexpression induces beta cell senescence by reducing the NAD+/NADH ratio.	I hypothesise that SLC25A51 overexpression does not induce beta cell senescence by reducing the NAD+/NADH ratio.			7	8	9	7	7	9	7	8	5	1
10.1101/2025.04.09.648006	Long-Distance Trail Running Induces Inflammatory-Associated Protein, Lipid, and Purine Oxidation in Red Blood Cells	I hypothesise that increased phosphatidylserine externalization in red blood cells after ultramarathon running is directly caused by inflammation-associated protein oxidation.	I hypothesise that increased phosphatidylserine externalization in red blood cells after ultramarathon running is not directly caused by inflammation-associated protein oxidation.			5	9	8	7	7	8	7	5	5	5
10.1101/2025.04.03.647069	Relaxin signaling is critical for virgin female reproductive physiology in Drosophila	I hypothesise that Dilp8 antagonizes insulin signaling to prevent oocyte overstocking in nutrient-rich conditions.	I hypothesise that Dilp8 does not antagonize insulin signaling to prevent oocyte overstocking in nutrient-rich conditions.			8	8	8	7	7	7	7	5	5	1
10.1101/2025.04.02.646724	H3K27 and H3K9 Methylation Mask Potential CTCF Binding Sites to Maintain 3D Genome Integrity	I hypothesise that H3K27 methylation prevents aberrant CTCF binding in aging cells.	I hypothesise that H3K27 methylation does not prevent aberrant CTCF binding in aging cells.			8	8	9	8	7	7	8	7	5	5
10.1101/2025.03.30.646231	Dark-induced decrease in ascorbate levels in Arabidopsis leaves occurs independently of ascorbate peroxidase and oxidase, recycling enzymes, and senescence signaling	I hypothesise that a novel, unidentified enzyme directly oxidises ascorbate in Arabidopsis leaves during prolonged dark conditions.	I hypothesise that a novel, unidentified enzyme does not directly oxidise ascorbate in Arabidopsis leaves during prolonged dark conditions.			8	8	7	10	9	8	5	5	5	1
10.1101/2025.03.26.645519	Normal aging increases white matter microglial reaction and perivascular macrophages in the microcebe primate	I hypothesise that increased HLA-DR expression in white matter microglia is a driver of age-related white matter dysfunction in primates.	I hypothesise that increased HLA-DR expression in white matter microglia is not a driver of age-related white matter dysfunction in primates.			8	7	8	7	7	7	8	5	5	1
10.1101/2025.03.28.645952	Temporal and Spatial Scales of Human Resting-state Cortical Activity Across the Lifespan	I hypothesise that decreasing temporal and spatial scales of resting-state cortical activity with age are causally linked to reduced sensorimotor and cognitive abilities.	I hypothesise that decreasing temporal and spatial scales of resting-state cortical activity with age are not causally linked to reduced sensorimotor and cognitive abilities.			7	8	5	1	8	7	8	5	5	5
10.1101/2025.03.26.645567	Signaling scaffold Shoc2 regulates lymphangiogenesis by suppressing mTORC1-mediated IFN responses.	I hypothesise that Shoc2 deficiency accelerates cellular senescence in lymphatic endothelial cells by increasing mTORC1 signaling.	I hypothesise that Shoc2 deficiency does not accelerate cellular senescence in lymphatic endothelial cells by increasing mTORC1 signaling.			8	8	8	7	8	7	5	5	5	1
10.1101/2025.03.27.645653	Antagonistic Regulation of LINE-1/Alu Elements and Their Repressor APOBEC3B in Cellular Senescence	I hypothesise that reduced APOBEC3B expression directly causes increased LINE-1 retrotransposition in senescent cells.	I hypothesise that reduced APOBEC3B expression does not directly cause increased LINE-1 retrotransposition in senescent cells.			8	5	8	5	7	7	7	5	5	5
10.1101/2025.03.28.645957	Elimination of senescent cells with senolytic host-directed therapy reduces tuberculosis progression in mice	I hypothesise that Mycobacterium tuberculosis infection induces lung myeloid cells to enter a senescent state.	I hypothesise that Mycobacterium tuberculosis infection does not induce lung myeloid cells to enter a senescent state.			8	8	7	5	7	8	7	5	5	1
10.1101/2025.03.25.645371	Acid-Sensing Ion Channel 1a Deficiency Drives Endocrine Hypertension in Male Mice	I hypothesise that ASIC1a deficiency in male mice causes elevated corticosterone levels, leading to hypertension.	I hypothesise that ASIC1a deficiency in male mice does not cause elevated corticosterone levels, leading to hypertension.			8	9	8	7	7	7	7	5	1	1
10.1101/2025.01.21.634044	Characterising ongoing brain aging and baseline effects from cross-sectional data	I hypothesise that a higher proportion of positive brain age delta in cross-sectional data is attributable to baseline effects rather than ongoing accelerated aging.	I hypothesise that a higher proportion of positive brain age delta in cross-sectional data is attributable to ongoing accelerated aging rather than baseline effects.			8	8	8	8	9	8	9	9	1	8
10.1101/2025.03.21.644463	Enhanced Functional Potential of Pseudogene-associated lncRNA Genes in Mammals	I hypothesise that pseudogene-associated lncRNAs directly bind to proteins involved in DNA repair pathways.	I hypothesise that pseudogene-associated lncRNAs do not directly bind to proteins involved in DNA repair pathways.			9	5	9	7	7	7	8	5	5	1
10.1101/2025.03.24.643319	Mechanisms of mitochondrial reactive oxygen species action in bone mesenchymal cells	I hypothesise that decreasing mtROS and senescent cells and increasing NAD+ will synergistically delay age-associated osteoporosis.	I hypothesise that increasing mtROS and senescent cells and decreasing NAD+ will not synergistically delay age-associated osteoporosis.			8	9	7	1	7	5	8	5	8	5
10.1101/2025.03.24.644902	Scale-dependent brain age with higher-order statistics from structural magnetic resonance imaging	I hypothesise that larger scale brain structural changes are associated with accelerated brain aging.	I hypothesise that larger scale brain structural changes are not associated with accelerated brain aging.			8	8	8	7	9	9	9	9	5	5
10.1101/2025.03.24.644846	Reduced neural sensitivity to musical tempo despite enhanced neural tracking of musical features in older adults	I hypothesise that older adults will exhibit reduced neural tracking of spectral flux at higher musical tempi compared to younger adults.	I hypothesise that older adults will not exhibit reduced neural tracking of spectral flux at higher musical tempi compared to younger adults.			1	5	8	5	7	7	5	7	5	1
10.1101/2025.03.18.642594	The Global Wheat Full Semantic Organ Segmentation (GWFSS) dataset	I hypothesise that excluding senescent tissues from wheat canopy segmentation improves disease quantification accuracy.	I hypothesise that including senescent tissues in wheat canopy segmentation does not improve disease quantification accuracy.			8	8	9	7	10	9	8	1	8	1
10.1101/2025.03.16.642675	Diurnal Regulation of Urinary Behavior and Gene Expression in Aged Mice	I hypothesise that restoring diurnal Piezo1 expression in aged mouse bladders will reduce nocturia.	I hypothesise that restoring diurnal Piezo1 expression in aged mouse bladders will not reduce nocturia.			8	8	8	5	7	5	8	5	7	5
10.1101/2025.03.07.642010	Orexin neurons couple pupil-linked arousal to Agrp hunger neurons to shape adaptive eating and food value perception	I hypothesise that orexin neuron ablation impairs the ability of non-food stimuli to suppress Agrp neuron activity and reduce feeding in aged mice.	I hypothesise that orexin neuron ablation does not impair the ability of non-food stimuli to suppress Agrp neuron activity and reduce feeding in aged mice.			8	8	9	7	5	7	7	5	5	5
10.1101/2025.03.04.641461	Differential activation of p53-Lamin A/C and p16-RB mediated senescence pathways in trophoblast from pregnancies complicated by type A2 Gestational Diabetes Mellitus	I hypothesise that increased p53-Lamin A/C pathway activation in GDM trophoblasts reduces placental function.	I hypothesise that increased p53-Lamin A/C pathway activation in GDM trophoblasts does not reduce placental function.			8	8	8	7	9	7	5	5	5	5
10.1101/2025.02.28.640639	A genome wide CRISPR screen reveals novel determinants of long-lived plasma cell secretory capacity	I hypothesise that V-type ATPase inhibition reduces antibody secretion in long-lived plasma cells.	I hypothesise that V-type ATPase inhibition does not reduce antibody secretion in long-lived plasma cells.			8	5	9	7	7	7	9	7	5	1
10.1101/2024.04.09.588665	Microglia aging in the hippocampus advances through intermediate states that drive activation and cognitive decline	I hypothesise that inhibiting TGF1 signaling in hippocampal microglia will prevent their advancement through intermediate aging states.	I hypothesise that inhibiting TGF1 signaling in hippocampal microglia will not prevent their advancement through intermediate aging states.			5	8	7	7	8	7	7	5	5	1
10.1101/2024.04.04.588128	Hyperactive 20S Proteasome Enhances Proteostasis and ERAD in C. elegans via degradation of Intrinsically Disordered Proteins.	I hypothesise that hyperactivating the 20S proteasome in C. elegans extends lifespan by increasing the degradation rate of intrinsically disordered proteins.	I hypothesise that hyperactivating the 20S proteasome in C. elegans does not extend lifespan by increasing the degradation rate of intrinsically disordered proteins.			8	8	8	7	9	9	8	5	5	1
10.1101/2024.04.01.587651	Nanoscale domains govern local diffusion and aging within FUS condensates	I hypothesise that increased nanodomain connectivity within FUS condensates accelerates FUS fibrilization.	I hypothesise that increased nanodomain connectivity within FUS condensates does not accelerate FUS fibrilization.			7	8	8	8	8	5	8	9	7	1
10.1101/2024.03.18.585629	Evaluating the position of the uncal apex as a predictor of episodic memory across the adult lifespan	I hypothesise that a more anterior uncal apex position is associated with poorer episodic memory performance in adults.	I hypothesise that a more anterior uncal apex position is not associated with poorer episodic memory performance in adults.			5	5	7	7	7	9	7	5	5	8
10.1101/2024.03.11.584363	Neuroprotective role of Hippo signaling by microtubule stability control in C. elegans	I hypothesise that inhibiting the Hippo pathway accelerates age-associated neuronal decline by destabilizing microtubules.	I hypothesise that inhibiting the Hippo pathway does not accelerate age-associated neuronal decline and does not destabilize microtubules.			5	8	7	7	7	9	7	3	5	1
10.1101/2024.02.23.581770	Mitochondrial origins of the pressure to sleep	I hypothesise that mitochondrial fragmentation in dFBNs directly causes increased neuronal excitability and reduced sleep.	I hypothesise that mitochondrial fragmentation in dFBNs does not directly cause increased neuronal excitability and reduced sleep.			5	8	8	1	7	7	7	1	5	1
10.1101/2024.02.21.581332	CD81+ senescent-like fibroblasts exaggerate inflammation and activate neutrophils via C3/C3aR1 axis in periodontitis	I hypothesise CD81+ senescent fibroblasts directly induce neutrophil activation via C3/C3aR1 in periodontitis.	I hypothesise that CD81+ senescent fibroblasts do not directly induce neutrophil activation via C3/C3aR1 in periodontitis.			8	9	8	7	7	8	8	5	5	5
10.1101/2024.02.11.579849	Impaired capillary-venous drainage contributes to gliosis and demyelination in white matter during aging	I hypothesise that impaired capillary-venous drainage in aging mice causes microgliosis and astrogliosis in deep white matter.	I hypothesise that impaired capillary-venous drainage in aging mice does not cause microgliosis and astrogliosis in deep white matter.			5	8	9	7	9	7	8	5	5	1
10.1101/2025.02.28.640749	Human brain cell-type-specific aging clocks based on single-nuclei transcriptomics	I hypothesise that increased microglial inflammatory gene expression directly correlates with chronological age in human prefrontal cortex.	I hypothesise that increased microglial inflammatory gene expression does not directly correlate with chronological age in human prefrontal cortex.			5	8	7	8	7	7	9	7	5	5
10.1101/2025.01.26.634899	BubR1 and Mad2 regulate adult midgut remodeling in Drosophila diapause	I hypothesise that BubR1 and Mad2 cytoplasmic localization in Drosophila intestinal stem cells is necessary for diapause-induced midgut remodeling.	I hypothesise that BubR1 and Mad2 cytoplasmic localization in Drosophila intestinal stem cells is not necessary for diapause-induced midgut remodeling.			8	10	8	7	8	8	10	1	5	5
10.1101/2025.01.22.634221	Optimized protocols for commonly-used murine models of heart failure with preserved ejection fraction.	I hypothesise that increasing L-NAME dosage and protocol length in C57BL/6J mice will induce a more severe HFpEF phenotype.	I hypothesise that increasing L-NAME dosage and protocol length in C57BL/6J mice will not induce a more severe HFpEF phenotype.			1	5	9	5	5	1	8	7	5	5
10.1101/2025.01.22.634239	Quantitative and sensitive sequencing of somatic mutations induced by a maize transposon	I hypothesise that tissue-specific differences in de novo transposon insertion abundance are driven by varying cell division rates.	I hypothesise that tissue-specific differences in de novo transposon insertion abundance are not driven by varying cell division rates.			8	8	8	9	10	8	9	7	5	1
10.1101/2024.01.25.577153	A lncRNA-mediated metabolic rewiring of cell senescence	I hypothesise sin-lncRNA depletion in senescent cells impairs mitochondrial oxidative phosphorylation.	I hypothesise that sin-lncRNA depletion in senescent cells does not impair mitochondrial oxidative phosphorylation.			7	8	8	10	8	8	7	5	5	8
10.1101/2024.01.17.576017	Cell-autonomous and non-cell-autonomous effects of arginase-II on cardiac aging	I hypothesise that inhibiting arginase-II in macrophages will reduce age-associated cardiac inflammation and myocyte apoptosis.	I hypothesise that inhibiting arginase-II in macrophages will not reduce age-associated cardiac inflammation and myocyte apoptosis.			8	8	1	2	7	7	9	5	7	1
10.1101/2024.01.09.574816	Stimulus-induced gamma sources reduce in power but not in spatial extent with healthy aging in human EEG	I hypothesise that reduced gamma source power, not spatial extent, is a biomarker for healthy aging.	I hypothesise that increased gamma source power, not spatial extent, is not a biomarker for healthy aging.			1	8	8	1	7	7	7	5	5	5
10.1101/2023.12.29.573604	Hyperoxia Induced Alteration of Chromatin Structure in Bone Marrow Derived Primary Mesenchymal Stromal Cells	I hypothesise that inhibiting EZH2 will prevent hyperoxia-induced chromatin remodeling in mesenchymal stromal cells.	I hypothesise that inhibiting EZH2 will not prevent hyperoxia-induced chromatin remodeling in mesenchymal stromal cells.			9	9	8	9	8	5	3	5	7	1
10.1101/2025.01.28.635321	Endurance training restores ageing-impaired lysosomal biogenesis factors in rest and response to acute exercise in rat skeletal muscle	I hypothesise that aged rats with impaired TFE3 activity will exhibit reduced skeletal muscle mass compared to young rats.	I hypothesise that aged rats with impaired TFE3 activity will not exhibit reduced skeletal muscle mass compared to young rats.			5	10	8	7	8	7	8	1	7	1
10.1101/2025.01.27.634647	Non-visual light modulates behavioral memory and gene expression in C. elegans	I hypothesise that light-induced cyp-14A5 expression accelerates aging in C. elegans.	I hypothesise that light-induced cyp-14A5 expression does not accelerate aging in C. elegans.			5	1	9	4	5	9	7	8	5	5
10.1101/2025.02.20.639379	Dopaminergic Modulation of Short-Term Associative Memory in Caenorhabditis elegans	I hypothesise that DOP-2 and DOP-3 receptor activity in C. elegans is required for active forgetting of associative memories.	I hypothesise that DOP-2 and DOP-3 receptor activity in C. elegans is not required for active forgetting of associative memories.			8	10	8	8	7	7	7	5	5	5
10.1101/2025.02.15.638397	Ultradeep N-glycoproteome Atlas of Mouse Reveals Spatiotemporal Signatures of Brain Aging and Neurodegenerative Diseases	I hypothesise that specific N-glycoprotein alterations in the mouse brain are causally linked to accelerated cellular senescence during aging.	I hypothesise that specific N-glycoprotein alterations in the mouse brain are not causally linked to accelerated cellular senescence during aging.			5	10	10	7	7	8	7	1	5	1
10.1101/2025.02.17.638583	Path integration impairments reveal early cognitive changes in Subjective Cognitive Decline	I hypothesise that increased memory leak in path integration predicts future Alzheimer's disease diagnosis in individuals with subjective cognitive decline.	I hypothesise that increased memory leak in path integration does not predict future Alzheimer's disease diagnosis in individuals with subjective cognitive decline.			9	8	7	8	8	7	7	5	5	5
10.1101/2025.02.15.638470	AMPK- and cGAS-Mediated Dual Sensing of Glucose and dsDNA Synergizes to Enhance Antitumor Immunity	I hypothesise that AMPK activation in cancer cells induces cellular senescence via TBK1 phosphorylation at S511.	I hypothesise that AMPK activation in cancer cells does not induce cellular senescence via TBK1 phosphorylation at S511.			8	8	8	1	7	7	7	5	5	1
10.1101/2025.02.17.638577	Human pluripotent stem cell-derived intestinal epithelial cells maintain small intestine-specific functions over time, even with repeated cell division	I hypothesise that pluripotent stem cell-derived intestinal epithelial cells exhibit higher drug metabolic capacity than Caco-2 cells.	I hypothesise that pluripotent stem cell-derived intestinal epithelial cells do not exhibit higher drug metabolic capacity than Caco-2 cells.			8	8	10	5	9	8	9	5	8	5
10.1101/2025.02.14.638366	Partial Input Loss Differentially Modifies Neural Pathways	I hypothesise that AOFF-T cells exhibit greater functional plasticity than AOFF-S cells following partial cone loss.	I hypothesise that AOFF-T cells do not exhibit greater functional plasticity than AOFF-S cells following partial cone loss.			1	1	5	5	7	5	8	3	5	5
10.1101/2025.02.11.637693	Lymph nodes link sex-biased immune aging to compromised antigen recognition	I hypothesise that testosterone ablation in middle-aged male mice restores naive CD8 T cell diversity and improves tumor recognition.	I hypothesise that testosterone ablation in middle-aged male mice does not restore naive CD8 T cell diversity and does not improve tumor recognition.			5	9	8	10	7	8	7	5	7	1
10.1101/2025.02.02.636113	Hair Bundle Degeneration is a Key Contributor to Age-Related Vestibular Dysfunction	I hypothesise that reducing genomic instability in vestibular hair cells will delay age-related vestibular dysfunction.	I hypothesise that reducing genomic instability in vestibular hair cells will not delay age-related vestibular dysfunction.			1	1	7	10	8	8	7	5	8	5
10.1101/2025.02.05.636598	BabyPy: a brain-age model for infancy, childhood and adolescence	I hypothesise that a higher BabyPy brain-age prediction in children correlates with poorer cognitive outcomes.	I hypothesise that a higher BabyPy brain-age prediction in children does not correlate with poorer cognitive outcomes.			5	8	9	8	7	8	8	3	5	5
10.1101/2023.12.02.569652	The chemotherapy-induced senescence-associated secretome promotes cell detachment and metastatic dissemination through metabolic reprogramming	I hypothesise that inhibiting Complex I activity will reduce chemotherapy-induced senescence-associated secretome-mediated cell detachment in ovarian cancer.	I hypothesise that inhibiting Complex I activity will not reduce chemotherapy-induced senescence-associated secretome-mediated cell detachment in ovarian cancer.			5	5	10	8	8	8	8	1	7	5
10.1101/2025.08.29.673010	Aging alters the distribution, stability, and transcriptional signature of engram cells	I hypothesise aged mice show reduced engram cell reactivation stability compared to young mice.	I hypothesise that aged mice do not show reduced engram cell reactivation stability compared to young mice.			1	8	9	7	8	8	8	7	5	5
10.1101/2025.09.02.673776	Memory-Related Default-Executive Coupling Across the Lifespan and Associations with Changes in Cognitive Control	I hypothesise that increased functional connectivity between the dLPFC and DMN in older adults is associated with poorer episodic memory performance.	I hypothesise that increased functional connectivity between the dLPFC and DMN in older adults is not associated with poorer episodic memory performance.			1	5	7	8	8	7	8	7	5	5
10.1101/2025.08.29.673011	Rejuvenation-Responsive and Senolytic-Sensitive Muscle Stem Cells Unveiled by CD200 and CD63 in Geriatric Muscle	I hypothesise that targeting CD63 and CD200 will selectively eliminate senescent muscle stem cells in aged mice.	I hypothesise that targeting CD63 and CD200 will not selectively eliminate senescent muscle stem cells in aged mice.			5	8	8	10	8	5	7	1	5	5
10.1101/2025.09.01.673523	The tumor suppressor CYLD acts as a deubiquitinase for mTOR to constrain its activity	I hypothesise that CYLD deubiquitination of mTORC1 is required for serum starvation-induced cell death.	I hypothesise that CYLD deubiquitination of mTORC1 is not required for serum starvation-induced cell death.			8	9	8	8	7	5	7	5	1	9
10.1101/2025.08.29.673062	The tyrosine kinase inhibitor GNF-7 targets senescent cells through allosteric activation of GCN2.	I hypothesise GNF-7 selectively kills senescent cells by allosterically activating GCN2.	I hypothesise that GNF-7 does not selectively kill senescent cells by allosterically activating GCN2.			9	8	5	5	7	8	7	1	5	1
10.1101/2025.01.06.631346	TERT prevents obesity-induced metabolic disorders by promoting adipose stem cell expansion and differentiation	I hypothesise that increased TERT expression in adipose stem and progenitor cells reduces obesity-induced senescence.	I hypothesise that increased TERT expression in adipose stem and progenitor cells does not reduce obesity-induced senescence.			9	8	9	7	5	7	5	5	8	5
10.1101/2025.01.05.631360	NF-ÃƒÆ’Ã…Â½Ãƒâ€šÃ‚ÂºB mediates transactivation of HNRNPD, resulting in PTEN destabilization and constitutive activation of the PI3K-AKT pathway in oral cancer cells	I hypothesise that inhibiting hnRNPD will reduce cellular senescence in oral cancer cells.	I hypothesise that inhibiting hnRNPD will not reduce cellular senescence in oral cancer cells.			8	8	7	5	10	7	7	5	5	1
10.1101/2025.01.05.631349	Absolute Quantification of Aging-Associated Glycans in IgG for Biological Age Prediction: Insights from Glycomics and Transcriptomics	I hypothesise that absolute quantification of GP3 and GP8 in IgG predicts biological age more accurately than relative quantification.	I hypothesise that absolute quantification of GP3 and GP8 in IgG does not predict biological age more accurately than relative quantification.			8	8	8	7	9	7	7	7	8	5
10.1101/2025.01.03.631233	Innovations in skin aging: biomimetic exosomes versus natural exosomes	I hypothesise that natural exosomes from bovine colostrum enhance fibroblast proliferation more than biomimetic exosomes in vitro.	I hypothesise that natural exosomes from bovine colostrum do not enhance fibroblast proliferation more than biomimetic exosomes in vitro.			8	8	9	6	7	7	7	8	5	5
10.1101/2025.01.02.631148	Endothelial Sensitivity to Pro-Fibrotic Signals Links Systemic exposure to Pulmonary Fibrosis	I hypothesise that endothelial cells exposed to subtoxic bleomycin doses will exhibit increased markers of cellular senescence.	I hypothesise that endothelial cells exposed to subtoxic bleomycin doses will not exhibit increased markers of cellular senescence.			8	8	8	6	8	9	8	10	5	1
10.1101/2025.01.02.631021	Role of Cockayne Syndrome B (CSB) Protein in Genome Maintenance in Human Cells under Oxidative Stress	I hypothesise CSB deficiency accelerates telomere attrition under chronic oxidative stress.	I hypothesise that CSB deficiency does not accelerate telomere attrition under chronic oxidative stress.			8	8	7	7	7	7	8	4	5	5
10.1101/2025.01.02.631056	An endogenous retroviral element co-opts an upstream regulatory sequence to achieve somatic expression and mobility	I hypothesise that escargot directly binds to the upstream enhancer of the rover retroviral element to drive its somatic expression in the Drosophila intestine.	I hypothesise that escargot does not directly bind to the upstream enhancer of the rover retroviral element to drive its somatic expression in the Drosophila intestine.			10	8	8	1	9	8	5	1	1	1
10.1101/2024.12.31.630903	Single-cell mapping of regulatory DNA:Protein interactions	I hypothesise that aging disrupts specific transcription factor binding patterns identified by D&D-seq in PBMCs.	I hypothesise that aging does not disrupt specific transcription factor binding patterns identified by D&D-seq in PBMCs.			8	9	8	9	7	5	7	5	5	8
10.1101/2024.12.31.630556	Tetralone-ABA enhances winter cold acclimation, reduces deacclimation, and delays budbreak in V. vinifera and V. hybrid grapevines	I hypothesise tetralone-ABA application delays grapevine budbreak by suppressing cell wall remodeling pathways.	I hypothesise that tetralone-ABA application does not delay grapevine budbreak and does not suppress cell wall remodeling pathways.			5	5	7	8	8	8	8	5	5	5
10.1101/2025.01.29.635500	Simultaneous profiling of native-state proteomes and transcriptomes of neural cell types using proximity labeling	I hypothesise that SPARO can identify novel age-related protein-mRNA discordances in astrocytes.	I hypothesise that SPARO cannot identify novel age-related protein-mRNA discordances in astrocytes.			5	5	7	6	8	8	5	7	8	1
10.1101/2025.02.09.637032	Impact of Aging on Theta-Phase Gamma-Amplitude Coupling During Learning: A Multivariate Analysis	I hypothesise that older adults will exhibit reduced theta-gamma phase-amplitude coupling during sequence learning compared to younger adults.	I hypothesise that older adults will not exhibit reduced theta-gamma phase-amplitude coupling during sequence learning compared to younger adults.			1	5	9	7	7	10	9	9	7	1
10.1101/2025.02.08.637273	Quiescence modulates age-related changes in the functional capacity of highly proliferative canine lung mesenchymal stromal cell populations	I hypothesise that inducing quiescence in young canine LMSCs will reduce their proliferative capacity, mimicking aged cells.	I hypothesise that inducing quiescence in young canine LMSCs will not reduce their proliferative capacity, not mimicking aged cells.			5	7	9	8	8	8	7	8	5	5
10.1101/2025.02.08.636742	Senolytics Restore Hematopoietic Stem Cells Function in Sickle Cell Disease	I hypothesise that senolytic treatment of aged mice will improve hematopoietic stem cell function.	I hypothesise that senolytic treatment of aged mice will not improve hematopoietic stem cell function.			8	5	9	7	8	7	8	5	8	1
10.1101/2025.02.08.637219	Complementary MR measures of white matter and their relation to cardiovascular health and cognition	I hypothesise that higher pulse pressure is associated with increased free-water/tissue damage in white matter.	I hypothesise that higher pulse pressure is not associated with increased free-water/tissue damage in white matter.			8	8	9	7	8	8	8	7	5	8
10.1101/2025.02.07.637137	A genetically-diverse mouse model reveals a complex gene-environment regulation of cognitive resilience and susceptibility to Alzheimer disease	I hypothesise that a specific genetic locus on mouse chromosome 10 confers cognitive resilience to Alzheimer's disease in females.	I hypothesise that a specific genetic locus on mouse chromosome 10 does not confer cognitive resilience to Alzheimer's disease in females.			8	8	8	8	8	8	9	5	5	1
10.1101/2025.02.07.636872	De-novo DNA Methylation of Bivalent Promoters Induces Gene Activation through PRC2 Displacement	I hypothesise that de novo DNA methylation of bivalent promoters in senescent cells activates pluripotency genes.	I hypothesise that de novo DNA methylation of bivalent promoters in senescent cells does not activate pluripotency genes.			9	7	8	8	9	8	5	8	5	1
10.1101/2025.02.06.636954	Context-specific interaction of the lipid regulator DIP-2 with phospholipid synthesis in axon regeneration and maintenance.	I hypothesise that DIP-2 negatively regulates CEPT-2 activity to promote axon regeneration after injury.	I hypothesise that DIP-2 does not negatively regulate CEPT-2 activity and does not promote axon regeneration after injury.			8	8	10	8	7	9	5	2	8	1
10.1101/2025.02.06.636831	Effects of Interleukin-6 dysregulation in a mouse model of Alzheimer's disease: unraveling the complexity beyond amyloidosis	I hypothesise that chronic neuroinflammation from transgenic IL-6 expression increases mortality in Tg2576 AD mice independently of amyloidosis.	I hypothesise that chronic neuroinflammation from transgenic IL-6 expression does not increase mortality in Tg2576 AD mice, depending on amyloidosis.			8	8	8	6	7	7	8	7	5	5
10.1101/2025.02.03.636172	IAP antagonists potentiate TNFÃƒÆ’Ã…Â½Ãƒâ€šÃ‚Â±-triggered apoptosis but selectively eliminate senescent tumor cells independently of TNFÃƒÆ’Ã…Â½Ãƒâ€šÃ‚Â±	I hypothesise IAP antagonists selectively induce apoptosis in senescent tumor cells independently of TNFÃƒÆ’Ã…Â½Ãƒâ€šÃ‚Â±.	I hypothesise that IAP antagonists do not selectively induce apoptosis in senescent tumor cells dependent on TNFÃŽÂ±.			8	9	8	1	9	8	8	5	5	1
10.1101/2025.02.04.636476	Noncoding and Coding Mechanisms of Aging Heart Failure with Preserved Ejection Fraction with Thyroid Dysfunction	I hypothesise that increased expression of three specific lncRNAs in aging HFpEF hearts contributes to cardiac hypertrophy.	I hypothesise that increased expression of three specific lncRNAs in aging HFpEF hearts does not contribute to cardiac hypertrophy.			8	8	8	8	7	8	1	5	5	1
10.1101/2025.02.02.636100	Lifetime changes in Body map based on music prediction	I hypothesise that bodily sensation mapping in response to music declines with age after the 30s.	I hypothesise that bodily sensation mapping in response to music does not decline with age after the 30s.			5	5	9	7	8	8	5	2	5	8
10.1101/2025.02.04.635811	A DC-sensitive video/electrophysiology monitoring unit for long-term continuous study of seizures and seizure-associated spreading depolarization in a rat model	I hypothesise that increased seizure frequency correlates with accelerated cellular senescence in aged rats.	I hypothesise that increased seizure frequency does not correlate with accelerated cellular senescence in aged rats.			5	8	8	7	8	1	9	5	5	5
10.1101/2025.02.05.636674	Cerebral blood perfusion across biological systems and the human lifespan	I hypothesise that reduced cerebral blood perfusion in aging individuals is associated with increased markers of cellular senescence in brain tissue.	I hypothesise that reduced cerebral blood perfusion in aging individuals is not associated with increased markers of cellular senescence in brain tissue.			8	8	9	7	9	8	9	5	7	1
10.1101/2025.02.05.636582	Network Biomarkers of Alzheimer's Disease Risk Derived from Joint Volume and Texture Covariance Patterns in Mouse Models	I hypothesise that APOE2 mice exhibit reduced age-related brain structural changes compared to APOE3 and APOE4 mice.	I hypothesise that APOE2 mice do not exhibit reduced age-related brain structural changes compared to APOE3 and APOE4 mice.			5	8	9	8	9	8	9	1	7	1
10.1101/2025.02.12.637499	MicroRNA-34a suppresses KLF2 to promote pathological angiogenesis through the CXCR4/CXCL12 pathway in age-related macular degeneration	I hypothesise that inhibiting miR-34a will reduce pathological angiogenesis in aged mice.	I hypothesise that inhibiting miR-34a will not reduce pathological angiogenesis in aged mice.			1	8	9	5	8	10	8	7	7	1
10.1101/2025.02.10.637497	Semiparametric Confidence Sets for Arbitrary Effect Sizes in Longitudinal Neuroimaging	I hypothesise that increased cortical thickness in specific brain regions is associated with slower cognitive decline in aging individuals.	I hypothesise that increased cortical thickness in specific brain regions is not associated with slower cognitive decline in aging individuals.			5	8	8	7	7	9	9	5	8	1
10.1101/2025.02.10.637453	Exposure to rotenone triggers redox driven systemwide lipidome alterations and metabolic tradeoffs linked to Parkinsons disease	I hypothesise that chronic rotenone exposure alters GP, SP, FA, and GL lipid classes in the brain.	I hypothesise that chronic rotenone exposure does not alter GP, SP, FA, and GL lipid classes in the brain.			9	8	8	5	8	9	8	1	7	5
10.1101/2025.02.11.637688	Disruption of Mitochondrial Dynamics and Stasis Leads to Liver Injury and Tumorigenesis	I hypothesise that liver-specific DRP1 knockout accelerates liver aging and tumorigenesis by increasing pyrimidine metabolism.	I hypothesise that liver-specific DRP1 knockout does not accelerate liver aging and tumorigenesis by decreasing pyrimidine metabolism.			1	8	9	7	8	7	7	9	5	1
10.1101/2025.02.05.636284	Epigenomic insights into extreme longevity in the world's oldest terrestrial animal, Jonathan	I hypothesise that reduced DNA methylation entropy in aging giant tortoises is associated with enhanced electron transport chain gene function.	I hypothesise that reduced DNA methylation entropy in aging giant tortoises is not associated with enhanced electron transport chain gene function.			8	1	8	9	7	8	5	5	7	1
10.1101/2025.01.29.635602	Altered endothelial mitochondrial Opa1-related fusion in mouse amplifies age-associated vascular and kidney damages	I hypothesise that reduced endothelial Opa1 expression accelerates age-associated vascular hypercontractility.	I hypothesise that reduced endothelial Opa1 expression does not accelerate age-associated vascular hypercontractility.			5	8	8	8	8	7	7	5	5	8
10.1101/2025.01.30.635304	Repurposing Regulatory Toxicology Safety Data to Identify Potential Pro-Longevity Substances	I hypothesise that pesticides identified as affecting mitochondrial bioenergetics in safety data will extend lifespan in mammalian models.	I hypothesise that pesticides identified as not affecting mitochondrial bioenergetics in safety data will not extend lifespan in mammalian models.			1	8	9	8	9	7	7	5	5	5
10.1101/2025.01.31.636008	SRS microscopy identifies inhibition of vitellogenesis as a mediator of lifespan extension by caloric restriction in C. elegans	I hypothesise that inhibiting vitellogenesis in C. elegans extends lifespan by at least 60%.	I hypothesise that inhibiting vitellogenesis in C. elegans does not extend lifespan by at least 60%.			5	8	8	7	7	7	7	1	1	1
10.1101/2025.01.31.635944	Analysis of The Senescence Secretome During Zebrafish Retina Regeneration	I hypothesise that depleting Nucleophosmin 1 (npm1a) will inhibit zebrafish retina regeneration.	I hypothesise that depleting Nucleophosmin 1 (npm1a) will not inhibit zebrafish retina regeneration.			8	1	8	7	7	7	7	5	5	1
10.1101/2025.02.02.635278	Phenotypic Changes in Undifferentiated and Retinoic Acid Differentiated HL-60/S4 Cells with-or-without LBR Knockdown	I hypothesise LBR knockdown impairs granulocyte differentiation by decreasing heterochromatin and histone methyltransferase activity.	I hypothesise that LBR knockdown does not impair granulocyte differentiation by increasing heterochromatin and histone methyltransferase activity.			8	9	9	8	7	7	8	3	5	1
10.1101/2025.01.30.635806	The relationship between neural differentiation and exploratory eye movements in healthy young and older adults	I hypothesise that increased gaze fixations in older adults cause age-related neural dedifferentiation in scene-selective cortex.	I hypothesise that increased gaze fixations in older adults do not cause age-related neural dedifferentiation in scene-selective cortex.			8	8	7	7	7	7	7	5	5	8
10.1101/2025.02.13.638147	The 5-HT1F Receptor Agonist Lasmiditan improves Cognition and Ameliorates Associated Cortico-Hippocampal Pathology in Aging Parkinsonian Mice	I hypothesise that lasmiditan treatment increases mitochondrial biogenesis in aging Parkinsonian mice.	I hypothesise that lasmiditan treatment does not increase mitochondrial biogenesis in aging Parkinsonian mice.			8	8	8	8	7	7	8	5	5	1
10.1101/2025.02.13.638126	Effects of High-Intensity Interval Training on Physical and Cognitive Function in Middle-Aged Male Mice	I hypothesise that 17-month-old male mice undergoing three months of HIIT will show improved physical function compared to sedentary controls.	I hypothesise that 17-month-old male mice undergoing three months of HIIT will not show improved physical function compared to sedentary controls.			1	8	9	5	5	7	8	5	8	1
10.1101/2025.02.17.638704	The nuclear pore complex connects energy sensing to transcriptional plasticity in longevity	I hypothesise that inhibiting NPP-16/NUP50 nuclear transport function will not affect its lifespan-extending ability.	I hypothesise that inhibiting NPP-16/NUP50 nuclear transport function will affect its lifespan-extending ability.			8	8	1	8	7	8	1	8	8	5
10.1101/2025.02.12.637814	A positive feedback loop of MPK3-PIN1A trafficking-auxin flux trio governs dual gravitropic and wounding response in rice	I hypothesise that inhibiting MPK3 activity will improve gravitropic response in rice.	I hypothesise that inhibiting MPK3 activity will not improve gravitropic response in rice.			10	10	5	8	7	9	8	1	5	1
10.1101/2025.02.13.637962	Investigation of mitochondrial phenotypes in motor neurons derived by direct conversion of fibroblasts from familial ALS subjects	I hypothesise that SOD1A4V, C9orf72, and TDP-43N352S fALS iMN exhibit increased mitochondrial membrane potential compared to control iMN.	I hypothesise that SOD1A4V, C9orf72, and TDP-43N352S fALS iMN do not exhibit increased mitochondrial membrane potential compared to control iMN.			8	8	7	5	8	7	1	1	1	1
10.1101/2025.02.14.638316	Molecular Mechanisms Limiting the Therapeutic Window of AAV Gene Therapy in Mouse Models of Blue Cone Monochromacy	I hypothesise that reduced AAV transduction efficiency in aged cones limits gene therapy efficacy in BCM mouse models.	I hypothesise that reduced AAV transduction efficiency in aged cones does not limit gene therapy efficacy in BCM mouse models.			9	5	9	10	8	9	7	9	8	9
10.1101/2025.02.14.638340	Peroxisomal Dysfunction Drives Loss of Dynamic Nutrient Responses to Initiate Metabolic Inflexibility During Aging	I hypothesise that impaired peroxisomal function directly causes reduced lipid mobilization during fasting in aging C. elegans.	I hypothesise that impaired peroxisomal function does not directly cause reduced lipid mobilization during fasting in aging C. elegans.			5	8	9	8	7	7	1	5	5	5
10.1101/2025.02.14.638233	STAT3 expression is reduced in cardiac pericytes in HFpEF and its loss reduces cellular adhesion and induces pericyte senescence	I hypothesise that reducing STAT3 expression in cardiac pericytes induces cellular senescence in vitro.	I hypothesise that reducing STAT3 expression in cardiac pericytes does not induce cellular senescence in vitro.			5	8	8	5	8	7	7	7	5	8
10.1101/2025.02.12.637845	Putative interfollicular stem cells of skin epidermis possess a specific mechanical signature that evolves during aging	I hypothesise that reducing ISC stiffness in aged skin will restore stemness potential.	I hypothesise that reducing ISC stiffness in aged skin will not restore stemness potential.			1	8	8	8	7	8	8	7	5	5
10.1101/2025.02.11.637611	Iron-deplete diet enhances Caenorhabditis elegans lifespan via oxidative stress response pathways	I hypothesise that reducing dietary iron in C. elegans activates the UPRmt pathway, extending lifespan.	I hypothesise that reducing dietary iron in C. elegans does not activate the UPRmt pathway, shortening lifespan.			5	5	8	7	7	8	6	5	8	1
10.1101/2025.02.10.637558	Genetic Modifiers Influencing the Acute and Long-Term Responses to Traumatic Brain Injury in Drosophila	I hypothesise that heterozygous chico mutants in Drosophila exhibit increased acute survival following TBI compared to wild-type controls.	I hypothesise that heterozygous chico mutants in Drosophila do not exhibit increased acute survival following TBI compared to wild-type controls.			1	9	8	8	7	7	5	1	8	5
10.1101/2025.02.22.639649	The aging human brain exhibits reduced cerebrospinal fluid flow during sleep due to both neural and vascular factors	I hypothesise that older adults exhibit reduced CSF flow during sleep compared to younger adults.	I hypothesise that older adults do not exhibit reduced CSF flow during sleep compared to younger adults.			8	8	9	7	7	7	8	5	5	1
10.1101/2025.02.19.639041	Telomerase modRNA offers a novel RNA-based approach to treat human pulmonary fibrosis	I hypothesise modRNA hTERT treatment reduces senescence markers in pulmonary fibrosis.	I hypothesise that modRNA hTERT treatment does not reduce senescence markers in pulmonary fibrosis.			8	8	8	7	8	7	8	5	5	1
10.1101/2025.02.18.638886	Chronic sleep curtailment expediates brain aging by activating the complement and coagulation cascades in mice	I hypothesise that chronic sleep curtailment in mice upregulates complement component 3 (C3) in the cortex.	I hypothesise that chronic sleep curtailment in mice does not upregulate complement component 3 (C3) in the cortex.			8	8	9	8	7	9	8	1	5	1
10.1101/2025.02.18.638802	Enhanced C/EBPÃƒÆ’Ã…Â½Ãƒâ€šÃ‚Â± function extends healthspan and lifespan in the African turquoise killifish	I hypothesise that eliminating the truncated C/EBP isoform in N. furzeri extends healthspan by increasing full-length C/EBP activity.	I hypothesise that eliminating the truncated C/EBP isoform in N. furzeri does not extend healthspan by decreasing full-length C/EBP activity.			8	8	7	7	7	8	1	1	5	1
10.1101/2025.02.22.638514	S. pombe telomerase RNA: secondary structure and flexible-scaffold function	I hypothesise that specific conserved regions of S. pombe TER1 RNA are essential for telomere maintenance and postponing senescence.	I hypothesise that specific conserved regions of S. pombe TER1 RNA are not essential for telomere maintenance and do not postpone senescence.			9	8	9	8	8	7	8	5	5	5
10.1101/2025.02.19.638963	The Greenland shark genome: insights into deep-sea ecology and lifespan extremes	I hypothesise increased copy numbers of TNF, TLR, and LRRFIP gene families contribute to the Greenland shark's exceptional longevity.	I hypothesise that increased copy numbers of TNF, TLR, and LRRFIP gene families do not contribute to the Greenland shark's exceptional longevity.			9	8	8	10	8	7	5	5	5	5
10.1101/2025.02.20.639336	Epigenetic and Transcriptomic Alterations Precede Amyloidosis in the Hippocampus of the Alzheimer's Disease AppNL-G-F Knock in Mouse Model	I hypothesise that early changes in chromatin accessibility in hippocampal excitatory neurons precede amyloid plaque deposition in AppNL-G-F mice.	I hypothesise that early changes in chromatin accessibility in hippocampal excitatory neurons do not precede amyloid plaque deposition in AppNL-G-F mice.			8	8	7	7	7	7	8	8	5	1
10.1101/2025.02.17.638605	Impact of nephrotoxins and oxidants on survival and transport function of hiPSC-derived renal proximal tubular cells	I hypothesise that cisplatin treatment during iPSC differentiation impairs long-term renal proximal tubular cell transport function.	I hypothesise that cisplatin treatment during iPSC differentiation does not impair long-term renal proximal tubular cell transport function.			5	8	8	10	7	9	9	7	5	9
10.1101/2025.02.19.639091	Uncovering the Signatures of Cellular Senescence in the Human Dorsolateral Prefrontal Cortex	I hypothesise that increased astrocyte abundance in the aging dlPFC is associated with cellular senescence markers.	I hypothesise that increased astrocyte abundance in the aging dlPFC is not associated with cellular senescence markers.			8	8	8	10	7	10	7	9	5	5
10.1101/2025.02.19.639019	Boosting Brainpower in Ageing: Task-Specific and Transfer Effects of tDCS-Enhanced Working Memory Training	I hypothesise that tDCS combined with working memory training will not improve behavioural working memory performance in older adults.	I hypothesise that tDCS combined with working memory training will improve behavioural working memory performance in older adults.			10	5	5	8	7	7	5	8	5	8
10.1101/2025.02.14.638240	Endothelial decorin is increased by ageing and, induces inflammation and diastolic dysfunction in the heart	I hypothesise that reducing endothelial decorin levels will ameliorate age-related diastolic dysfunction in mice.	I hypothesise that reducing endothelial decorin levels will not ameliorate age-related diastolic dysfunction in mice.			8	8	9	5	7	8	8	10	8	1
10.1101/2025.02.15.638475	Microarray, validation and gene-enrichment approach for assessing differentially expressed circulating miRNAs in obese and lean heart failure patients	I hypothesise that elevated miR-451a levels in heart failure patients are associated with accelerated cellular aging.	I hypothesise that elevated miR-451a levels in heart failure patients are not associated with accelerated cellular aging.			8	8	8	7	7	9	4	4	5	5
10.1101/2025.02.13.638031	Identification of pyroptosis-related diagnostic model relate to immune infiltration in osteoarthritis	I hypothesise that increased pyroptosis in chondrocytes contributes to osteoarthritis progression in aging individuals.	I hypothesise that increased pyroptosis in chondrocytes does not contribute to osteoarthritis progression in aging individuals.			8	9	8	5	8	7	8	5	5	1
10.1101/2025.02.23.639319	Dysregulation of the actin cytoskeleton and FMRP causes polar body protrusion defects in human fragile X premutation and aged oocytes	I hypothesise that elevated profilin1 levels in human oocytes cause polar body protrusion defects.	I hypothesise that elevated profilin1 levels in human oocytes do not cause polar body protrusion defects.			1	8	5	9	7	8	7	5	1	9
10.1101/2025.02.24.639173	Modeling the Aging Human Lung: Generation of a Senescent Human Lung Organoid Culture System	I hypothesise that doxorubicin-induced senescence in lung organoids increases IL-6 secretion.	I hypothesise that doxorubicin-induced senescence in lung organoids does not increase IL-6 secretion.			5	8	8	1	9	8	8	5	8	1
10.1101/2025.02.21.639584	Multi-omic subtypes of Alzheimer's dementia are differentially associated with psychological traits	I hypothesise AD subtype 1 is associated with higher neuroticism in Alzheimer's dementia patients.	I hypothesise that AD subtype 1 is not associated with higher neuroticism in Alzheimer's dementia patients.			8	8	9	7	9	8	7	7	5	5
10.1101/2025.02.24.639862	Apolipoprotein E abundance is elevated in the brains of individuals with Down syndrome-Alzheimer's disease	I hypothesise that elevated APOE abundance in DSAD astrocytes drives increased amyloid-beta plaque formation.	I hypothesise that elevated APOE abundance in DSAD astrocytes does not drive increased amyloid-beta plaque formation.			8	8	10	7	7	7	7	8	5	5
10.1101/2025.02.24.639868	PLXNB1 and other signaling drives a pathologic astrocyte state contributing to cognitive decline in Alzheimer's Disease	I hypothesise that PLXNB1 signaling directly drives the emergence of the Ast10 cellular state in aging brains.	I hypothesise that PLXNB1 signaling does not directly drive the emergence of the Ast10 cellular state in aging brains.			8	8	7	3	8	7	10	5	5	1
10.1101/2025.02.24.640005	The Stop Signal Stepping Task: how action cancellation commands disrupt step initiation in young and healthy older adults	I hypothesise that older adults exhibit greater proactive slowing of stepping responses compared to young adults when stop cues are anticipated.	I hypothesise that older adults do not exhibit greater proactive slowing of stepping responses compared to young adults when stop cues are anticipated.			5	8	8	7	7	7	7	5	8	1
10.1101/2025.02.21.639520	Deep Learning to Predict Future Cognitive Decline: A Multimodal Approach Using Brain MRI and Clinical Data	I hypothesise that a hybrid deep learning model integrating brain MRI and clinical data will predict future cognitive decline (sobCDR change) more accurately than AutoGluon.	I hypothesise that a hybrid deep learning model integrating brain MRI and clinical data will not predict future cognitive decline (sobCDR change) more accurately than AutoGluon.			5	8	9	10	8	8	7	5	5	5
10.1101/2025.02.20.639395	Neurophysiological Correlates of Modifiable Dementia Risk Factors in Cognitively Unimpaired Older Adults	I hypothesise that lower SMC GABA+ concentration predicts future cognitive decline in unimpaired older adults.	I hypothesise that lower SMC GABA+ concentration does not predict future cognitive decline in unimpaired older adults.			5	8	8	10	7	9	7	1	5	5
10.1101/2025.02.25.640129	Ketogenic interventions prevent alterations of the gut microbiome in transgenic Alzheimer Disease mice	I hypothesise ketogenic interventions restore gut microbiome dysbiosis in aging by reducing Bifidobacterium.	I hypothesise that ketogenic interventions do not restore gut microbiome dysbiosis in aging by reducing Bifidobacterium.			5	8	5	7	7	5	7	5	5	1
10.1101/2025.02.19.639184	Head engagement during visuomotor tracking is determined by postural demands and aging	I hypothesise that younger adults increase head engagement during visuomotor tracking to improve accuracy, while older adults reduce head engagement to preserve balance.	I hypothesise that younger adults do not increase head engagement during visuomotor tracking to improve accuracy, while older adults do not reduce head engagement to preserve balance.			5	1	8	7	8	8	8	3	5	5
10.1101/2025.02.24.639183	Stress drives plasticity in leaf maturation transcriptional dynamics	I hypothesise drought stress accelerates leaf maturation transcriptional programs in Arabidopsis.	I hypothesise that drought stress does not accelerate leaf maturation transcriptional programs in Arabidopsis.			5	8	9	5	9	8	9	7	5	1
10.1101/2025.02.19.639148	Boosting Hyperalignment Performance with Age-specific Templates	I hypothesise that using age-specific hyperalignment templates improves alignment accuracy in older adults compared to a canonical template.	I hypothesise that using age-specific hyperalignment templates does not improve alignment accuracy in older adults compared to a canonical template.			8	9	9	8	7	8	8	7	8	5
10.1101/2025.02.24.639740	The Multiomics Blueprint of Extreme Human Lifespan	I hypothesise that supercentenarians exhibit longer telomeres compared to younger individuals.	I hypothesise that supercentenarians do not exhibit longer telomeres compared to younger individuals.			5	8	7	8	9	9	8	7	5	1
10.1101/2025.02.19.639045	Sex-dependent effects of a gestational ketogenic diet on offspring birth and lifespan	I hypothesise that gestational ketogenic diet exposure reduces male offspring lifespan by promoting late-onset obesity.	I hypothesise that gestational ketogenic diet exposure does not reduce male offspring lifespan by promoting late-onset obesity.			8	8	7	7	9	7	8	1	5	8
10.1101/2025.02.19.639116	Demystifying The Myelin g ratio: Its Origin, Derivation and Interpretation	I hypothesise that altered axon-fiber diameter relationships during aging lead to inaccurate myelin g ratio measurements of myelin thickness.	I hypothesise that altered axon-fiber diameter relationships during aging do not lead to inaccurate myelin g ratio measurements of myelin thickness.			8	9	8	9	7	8	7	8	5	10
10.1101/2025.02.26.640398	Characterizing massa intermedia morphology in schizophrenia: associations with aging, neuropsychological functioning, and atypical hippocampal development	I hypothesise that smaller massa intermedia size in schizophrenia is caused by accelerated aging.	I hypothesise that smaller massa intermedia size in schizophrenia is not caused by accelerated aging.			8	8	8	8	7	9	8	10	5	10
10.1101/2025.02.25.640218	Relationships between GABA+ and Glx concentrations with age and inhibition in healthy older adults	I hypothesise that higher SM1 Glx concentrations are associated with better performance on the go/no-go inhibition task in healthy older adults.	I hypothesise that higher SM1 Glx concentrations are not associated with better performance on the go/no-go inhibition task in healthy older adults.			1	8	8	5	8	7	7	5	7	5
10.1101/2025.01.28.635350	Multi-tissue transcriptomic aging atlas reveals predictive aging biomarkers in the killifish	I hypothesise that increased myeloid bias in killifish head kidney during aging is associated with reduced immune function.	I hypothesise that increased myeloid bias in killifish head kidney during aging is not associated with reduced immune function.			8	8	8	8	7	7	7	7	5	8
10.1101/2025.01.28.635306	Blood mitochondrial health markers cf-mtDNA and GDF15 in human aging	I hypothesise that higher plasma GDF15 levels are causally linked to accelerated biological aging in humans.	I hypothesise that higher plasma GDF15 levels are not causally linked to accelerated biological aging in humans.			1	8	7	10	7	8	10	7	5	5
10.1101/2025.01.30.635595	Microglial plasticity governed by state-specific enhancer landscapes	I hypothesise that histone modifications at specific enhancers drive microglial transitions from PAM to DAM states during aging.	I hypothesise that histone modifications at specific enhancers do not drive microglial transitions from PAM to DAM states during aging.			8	8	8	7	10	5	8	5	5	1
10.1101/2025.01.28.635269	Nuclear Import Defects Drive Cell Cycle Dysregulation in Neurodegeneration	I hypothesise that inhibiting importin-beta nuclear import in post-mitotic neurons induces cell cycle re-entry and subsequent G1/S arrest.	I hypothesise that inhibiting importin-beta nuclear import in post-mitotic neurons does not induce cell cycle re-entry and subsequent G1/S arrest.			8	8	8	9	7	7	7	1	1	10
10.1101/2025.01.28.635384	Lower cortical FKBP5 DNA methylation at key enhancer sites is associated with older age and higher gene expression in schizophrenia	I hypothesise lower FKBP5 DNA methylation in cortical enhancers is associated with increased FKBP5 gene expression in aging.	I hypothesise that lower FKBP5 DNA methylation in cortical enhancers is not associated with increased FKBP5 gene expression in aging.			7	8	5	8	7	7	7	8	7	1
10.1101/2025.01.29.635299	Protein sequence editing defines distinct and overlapping functions of SKN-1A/Nrf1 and SKN-1C/Nrf2.	I hypothesise that sequence editing of SKN-1A/Nrf1 is required for its activation of proteasome subunit genes.	I hypothesise that sequence editing of SKN-1A/Nrf1 is not required for its activation of proteasome subunit genes.			8	8	8	8	9	8	5	9	5	9
10.1101/2025.01.27.635053	The shortest telomere in telomerase-negative cells triggers replicative senescence at a critical threshold length and also fuels genomic instability	I hypothesise that a shortest telomere below a critical length threshold is necessary and sufficient to induce replicative senescence in telomerase-negative cells.	I hypothesise that a shortest telomere above a critical length threshold is not necessary and sufficient to prevent replicative senescence in telomerase-negative cells.			8	8	9	7	9	8	1	5	1	5
10.1101/2025.02.25.640161	Endurance Exercise Ameliorates Aging-Related Bradyarrhythmia in Drosophila Resulting from miR-283 Knockdown in LNvs	I hypothesise that endurance exercise reduces age-related bradyarrhythmia in Drosophila by downregulating miR-283 in the brain and myocardium.	I hypothesise that endurance exercise does not reduce age-related bradyarrhythmia in Drosophila by downregulating miR-283 in the brain and myocardium.			7	10	7	1	5	9	5	5	5	5
10.1101/2025.02.25.640214	Mechanistic target of rapamycin/blood-testes barrier mechanism mediates acceleration of sperm epigenetic aging by environmental factors	I hypothesise that inhibiting mTORC1 activity will reduce sperm epigenetic aging in mice exposed to heat stress.	I hypothesise that inhibiting mTORC1 activity will not reduce sperm epigenetic aging in mice exposed to heat stress.			8	8	8	7	7	9	8	5	8	1
10.1101/2025.02.28.640888	Simultaneous analysis of single-cell gene expression and morphology provides new insight into how microglia change with age	I hypothesise that aged microglia with ramified morphology exhibit altered mRNA localization patterns compared to young microglia.	I hypothesise that aged microglia with ramified morphology do not exhibit altered mRNA localization patterns compared to young microglia.			5	8	8	7	8	8	8	5	5	1
10.1101/2025.02.24.639825	Dynamics of blood NAD and glutathione in health, disease, aging and under NAD-booster treatment	I hypothesise that blood NAD+ levels do not change with age in healthy humans.	I hypothesise that blood NAD+ levels change with age in healthy humans.			7	9	9	9	7	8	9	8	1	8
10.1101/2025.02.24.639802	Reversible and Causal Epigenetic Information Loss in Liver Aging and Disease	I hypothesise that repeated fasting can reverse age-associated epigenetic information loss in liver cells.	I hypothesise that repeated fasting cannot reverse age-associated epigenetic information loss in liver cells.			5	8	8	2	8	8	8	4	7	1
10.1101/2025.02.23.639772	Incongruent end structures of leading and lagging telomeres dictate the nature of end replication problem	I hypothesise that RNase H2 activity directly causes telomere erosion by removing RNA primers from lagging strand telomeres.	I hypothesise that RNase H2 activity does not directly cause telomere erosion by removing RNA primers from lagging strand telomeres.			8	8	7	9	8	7	5	9	1	1
10.1101/2025.02.21.639496	Chemical enhancement of DNA repair in aging	I hypothesise that increasing KIF2C activity in aged cells will reduce DNA double-strand breaks.	I hypothesise that increasing KIF2C activity in aged cells will not reduce DNA double-strand breaks.			5	8	7	7	8	9	8	1	7	1
10.1101/2025.02.27.640570	A versatile cohesion manipulation system reveals CENP-A dysfunction accelerates female reproductive age-related egg aneuploidy.	I hypothesise that CENP-A depletion in young eggs causes premature sister chromatid separation, mimicking age-related aneuploidy.	I hypothesise that CENP-A depletion in young eggs does not cause premature sister chromatid separation, not mimicking age-related aneuploidy.			8	8	7	7	8	10	10	5	5	1
10.1101/2025.02.21.639525	Activation of proteostasis pathways after acute exercise in C. elegans	I hypothesise acute exercise in C. elegans increases proteasomal activity and autophagic flux.	I hypothesise that acute exercise in C. elegans does not increase proteasomal activity and autophagic flux.			8	9	9	1	7	7	8	5	8	1
10.1101/2025.02.26.640157	Sphingolipid metabolism drives mitochondria remodeling during aging and oxidative stress	I hypothesise that inhibiting sphingolipid biosynthesis prevents age-related mitochondrial morphological changes in yeast.	I hypothesise that inhibiting sphingolipid biosynthesis does not prevent age-related mitochondrial morphological changes in yeast.			9	8	8	8	7	7	7	5	8	1
10.1101/2025.02.21.639421	Compositional control of ageing kineticsin TDP-43 condensates	I hypothesise that increasing arginine-rich peptide concentration in TDP-43 condensates accelerates their ageing kinetics.	I hypothesise that increasing arginine-rich peptide concentration in TDP-43 condensates does not accelerate their ageing kinetics.			10	1	6	5	7	8	8	7	5	1
10.1101/2025.02.28.640897	Harnessing the Evolution of Proteostasis Networks to Reverse Cognitive Dysfunction	I hypothesise that inhibiting the ISR with DP71L will reverse age-related cognitive decline in mice.	I hypothesise that inhibiting the ISR with DP71L will not reverse age-related cognitive decline in mice.			1	8	1	9	8	7	8	5	5	1
10.1101/2025.01.27.635096	Cigarette smoke and biological age induce degenerative heterogeneity in retinalpigment epithelium	I hypothesise cigarette smoke induces RPE dedifferentiation via distinct epigenetic changes from aging.	I hypothesise that cigarette smoke does not induce RPE dedifferentiation via distinct epigenetic changes from aging.			10	9	7	8	9	9	7	7	5	1
10.1101/2025.01.20.633994	Deletion of PIEZO1 in adult cardiomyocytes accelerates cardiac aging and causes premature death	I hypothesise that PIEZO1 deletion in adult cardiomyocytes accelerates cardiac aging by increasing senescence markers.	I hypothesise that PIEZO1 deletion in adult cardiomyocytes does not accelerate cardiac aging by decreasing senescence markers.			8	8	8	5	7	8	7	5	5	1
10.1101/2025.01.26.634919	Feedback regulation between FOXM1 and APC/CCdh1 determines the changes in cell cycle dynamics during aging	I hypothesise that repressing FZR1/Cdh1 in aged cells restores CDK1 switch-like activation at mitotic entry.	I hypothesise that repressing FZR1/Cdh1 in aged cells does not restore CDK1 switch-like activation at mitotic entry.			8	8	9	7	7	9	8	1	5	1
10.1101/2025.01.25.634746	Reduced systemic autophagy by simultaneous loss of ATG4B, ATG4C and ATG4D leads to accelerated aging in mice	I hypothesise that ATG4B, ATG4C, and ATG4D deficiency accelerates aging by increasing systemic cellular senescence.	I hypothesise that ATG4B, ATG4C, and ATG4D deficiency does not accelerate aging and does not increase systemic cellular senescence.			8	8	8	1	10	7	10	10	5	9
10.1101/2025.01.23.634373	Eg5 Inhibitor SB743921 Causes p53-Dependent Cell Cycle Arrest, Senescence and Death in Tumor Cells	I hypothesise SB743921 induces p53-independent, irreversible senescence in tumor cells.	I hypothesise that SB743921 does not induce p53-independent, irreversible senescence in tumor cells.			5	8	10	10	7	9	8	5	1	1
10.1101/2025.01.22.634376	CD4 T cell dysfunction is associated with bacterial recrudescence during chronic tuberculosis.	I hypothesise that CD4 T cell senescence in chronic tuberculosis leads to increased bacterial recrudescence.	I hypothesise that CD4 T cell senescence in chronic tuberculosis does not lead to increased bacterial recrudescence.			8	8	9	10	7	8	1	7	5	8
10.1101/2025.02.28.640905	Mapping the ISR Landscape in Cognitive Disorders via single-cell multi-omics	I hypothesise that selective deletion of ATF4 in GABAergic neurons ameliorates age-related cognitive decline in mice.	I hypothesise that selective deletion of ATF4 in GABAergic neurons does not ameliorate age-related cognitive decline in mice.			5	8	8	7	7	7	4	5	7	5
10.1101/2025.03.01.640978	Spatial and molecular insights into microglial roles in cerebellar aging	I hypothesise that aged cerebellar microglia exhibit increased expression of neuroprotective immune genes compared to young cerebellar microglia.	I hypothesise that aged cerebellar microglia do not exhibit increased expression of neuroprotective immune genes compared to young cerebellar microglia.			5	5	8	7	9	7	10	8	8	1
10.1101/2025.03.06.641819	Amyloid-beta pathology increases synaptic engulfment by glia in feline cognitive dysfunction syndrome: A naturally occurring model of Alzheimer's disease	I hypothesise that increased amyloid-beta accumulation within synapses directly correlates with increased synaptic engulfment by microglia in feline cognitive dysfunction syndrome.	I hypothesise that increased amyloid-beta accumulation within synapses does not directly correlate with increased synaptic engulfment by microglia in feline cognitive dysfunction syndrome.			8	8	8	5	7	8	8	5	5	5
10.1101/2025.03.06.640586	The 1-Cys peroxiredoxin, PRDX-6, suppresses a pro-survival response, including the Flavin monoxygenase, FMO-2, that protects against fungal and bacterial infection	I hypothesise that PRDX-6 deficiency extends C. elegans lifespan by increasing FMO-2 expression.	I hypothesise that PRDX-6 deficiency does not extend C. elegans lifespan by increasing FMO-2 expression.			5	8	5	7	9	8	8	5	5	1
10.1101/2025.03.03.637437	The Olfactory Epithelium: A Critical Gateway for Pathological Tau Propagation and a Target for Mitigating Tauopathy in the Central Nervous System	I hypothesise that stripping the olfactory epithelium in PS19 mice will reduce tau pathology in the piriform cortex.	I hypothesise that stripping the olfactory epithelium in PS19 mice will not reduce tau pathology in the piriform cortex.			1	8	5	7	7	7	3	1	7	1
10.1101/2025.03.02.641015	Micromechanics of lung capillaries across mouse lifespan and in positive- vs negative-pressure ventilation	I hypothesise that aged mouse lung capillaries exhibit increased stiffness compared to young adult capillaries.	I hypothesise that aged mouse lung capillaries do not exhibit increased stiffness compared to young adult capillaries.			7	8	8	7	9	9	9	8	8	1
10.1101/2025.03.01.640999	Parity and APOEÃƒÆ’Ã…Â½Ãƒâ€šÃ‚Âµ4 genotype contribute distinct changes to functional connectivity across the middle-aged brain	I hypothesise primiparity enhances functional connectivity network efficiency in middle-aged brains.	I hypothesise that primiparity does not enhance functional connectivity network efficiency in middle-aged brains.			1	5	7	8	8	8	7	5	5	5
10.1101/2025.03.06.641815	The hollow truth: ethylene-triggered ROS, PCD, senescence, and autophagy drive hollow stem formation	I hypothesise that ethylene treatment of water spinach will increase programmed cell death in shoot tips.	I hypothesise that ethylene treatment of water spinach will not increase programmed cell death in shoot tips.			5	8	8	7	8	7	10	5	5	1
10.1101/2025.03.01.640648	Regulation of Female Reproductive Aging by the Spag17 Gene	I hypothesise that Spag17 deficiency accelerates ovarian aging by activating senescence signaling pathways.	I hypothesise that Spag17 deficiency does not accelerate ovarian aging and does not activate senescence signaling pathways.			8	8	1	7	7	8	7	5	5	8
10.1101/2025.02.28.640731	Mutation of an insulin-sensitive Drosophila insulin-like receptor mutant requires methionine metabolism reprogramming to extend lifespan	I hypothesise that reprogramming methionine metabolism is sufficient to extend Drosophila lifespan independently of insulin sensitivity.	I hypothesise that reprogramming methionine metabolism is not sufficient to extend Drosophila lifespan independently of insulin sensitivity.			9	8	7	7	8	7	8	5	8	5
10.1101/2025.02.27.640377	Biopsychosocial Correlates of Resting and Stress-Reactive Salivary GDF15: Preliminary Findings	I hypothesise that higher baseline salivary GDF15 levels predict increased cellular senescence in healthy working adults.	I hypothesise that higher baseline salivary GDF15 levels do not predict increased cellular senescence in healthy working adults.			7	8	9	7	7	9	8	5	5	5
10.1101/2025.03.03.641349	Disturbed proteostasis is the key event that triggers cellular senescence through the regulation of chromatin organization and genome stability	I hypothesise that inhibiting protein synthesis will prevent stress-induced cellular senescence.	I hypothesise that inhibiting protein synthesis will not prevent stress-induced cellular senescence.			5	8	8	7	7	9	8	5	1	1
10.1101/2025.02.28.640739	TRF2 Non-Telomeric Function is Indispensable for Neural stemness	I hypothesise TRF2's non-telomeric function maintains neural stem cell identity by repressing differentiation genes via PRC2.	I hypothesise that TRF2's non-telomeric function does not maintain neural stem cell identity by failing to repress differentiation genes via PRC2.			7	1	7	3	7	7	7	5	5	5
10.1101/2025.02.27.640481	Comparative analysis of human and mouse ovaries across age	I hypothesise that increased ovarian sympathetic nerve density in aged humans is causally linked to reduced oocyte competence.	I hypothesise that increased ovarian sympathetic nerve density in aged humans is not causally linked to reduced oocyte competence.			5	8	9	7	9	10	8	5	5	5
10.1101/2025.02.28.640868	Parallel gene expression changes in ventral midbrain dopamine and GABA neurons during normal aging	I hypothesise that increased inflammatory response gene expression in ventral midbrain dopamine neurons contributes to age-related functional deficits.	I hypothesise that increased inflammatory response gene expression in ventral midbrain dopamine neurons does not contribute to age-related functional deficits.			8	8	9	5	7	7	9	1	5	1
10.1101/2025.03.09.639714	CIRCADIAN MODULATION OF NEUTROPHIL FUNCTION DETERMINES COLLATERAL PERFUSION AND OUTCOME AFTER ISCHEMIC STROKE	I hypothesise that blocking neutrophil extracellular trap formation during the inactive phase improves collateral perfusion after ischemic stroke.	I hypothesise that blocking neutrophil extracellular trap formation during the inactive phase does not improve collateral perfusion after ischemic stroke.			8	8	5	5	7	7	8	1	8	5
10.1101/2025.03.12.642788	Activation of a Src-JNK pathway in unscheduled endocycling cells of the Drosophila wing disc induces a chronic wounding response	I hypothesise that inhibiting the Src42A-Shark-Slpr pathway in Drosophila wing discs will prevent JNK activation in iECs.	I hypothesise that inhibiting the Src42A-Shark-Slpr pathway in Drosophila wing discs will not prevent JNK activation in iECs.			8	9	9	7	9	7	8	1	8	5
10.1101/2025.03.13.643031	Short Polysialic Acid Counteracts Age-Related Synaptic and Cognitive Deficits	I hypothesise that NANA12 treatment reduces synaptic phagocytosis in very old mice.	I hypothesise that NANA12 treatment does not reduce synaptic phagocytosis in very old mice.			5	8	5	7	7	7	8	1	5	1
10.1101/2025.03.07.641679	Exploring Erdr1-Mid1 Axis: Shared Risk Factors and Molecular Mechanisms in Aging and Degenerative Diseases	I hypothesise that reducing Erdr1-145 secretion will decrease oxidative stress and ameliorate aging phenotypes.	I hypothesise that reducing Erdr1-145 secretion will not decrease oxidative stress and will exacerbate aging phenotypes.			8	8	7	5	8	8	8	5	5	1
10.1101/2025.03.07.642110	NLRP10 Cleaves Oxidized DNA inhibited by OGG1 inhibitors: A Newly Identified Role in DNA Damage Processing and Senescence Regulation.	I hypothesise NLRP10 directly cleaves oxidized DNA, leading to cytosolic mtDNA release and senescence.	I hypothesise that NLRP10 does not directly cleave oxidized DNA, preventing cytosolic mtDNA release and senescence.			8	9	1	8	7	9	3	1	1	1
10.1101/2025.03.07.641920	Temporal analysis of physiological phenotypes identifies novel metabolic and genetic underpinnings of senescence in maize	I hypothesise that elevated mannitol and erythritol levels accelerate leaf senescence in maize.	I hypothesise that elevated mannitol and erythritol levels do not accelerate leaf senescence in maize.			8	8	7	8	9	7	5	8	5	8
10.1101/2025.03.04.641360	Visualization of stochastic expression of clustered protocadherin ÃƒÆ’Ã…Â½Ãƒâ€šÃ‚Â² isoforms in vivo	I hypothesise that increased cPcdhÃƒÆ’Ã…Â½Ãƒâ€šÃ‚Â²3 expression in the aging brain is linked to cellular senescence.	I hypothesise that increased cPcdhÃŽÂ²3 expression in the aging brain is not linked to cellular senescence.			7	8	8	8	9	5	7	5	5	5
10.1101/2025.03.11.641786	Multimodal brain cell atlas across the adult macaque lifespan	I hypothesise that increased expression of identified transcription factors in pons and medulla cells correlates with reduced synaptic communication in aged macaques.	I hypothesise that increased expression of identified transcription factors in pons and medulla cells does not correlate with reduced synaptic communication in aged macaques.			1	8	7	7	7	8	7	8	5	5
10.1101/2025.03.03.641327	Lifespan Trajectories of the Brains Functional Complexity Characterized by Multiscale Sample Entropy	I hypothesise that a decline in brain functional complexity, as measured by multiscale sample entropy, is associated with age-related executive function deficits.	I hypothesise that a decline in brain functional complexity, as measured by multiscale sample entropy, is not associated with age-related executive function deficits.			7	1	8	8	8	7	10	1	7	8
10.1101/2025.03.04.641485	Changes in serial sarcomere number of five hindlimb muscles across adult aging in rats	I hypothesise that increasing age in rats leads to a significant decrease in serial sarcomere number in hindlimb muscles.	I hypothesise that increasing age in rats does not lead to a significant decrease in serial sarcomere number in hindlimb muscles.			8	8	7	8	8	9	1	1	1	8
10.1101/2025.03.04.640878	Cell-Surface LAMP1 is a Senescence Marker in Aging and Idiopathic Pulmonary Fibrosis	I hypothesise that LAMP1 expression increases in human fibroblasts with age.	I hypothesise that LAMP1 expression does not increase in human fibroblasts with age.			5	8	8	8	8	7	8	10	5	1
10.1101/2025.03.09.642233	Multiregional blood-brain barrier phenotyping identifies the prefrontal cortex as the most vulnerable region to ageing in mice	I hypothesise that increased prefrontal cortex BBB permeability in aged mice is caused by changes in brain endothelial cell protein expression.	I hypothesise that increased prefrontal cortex BBB permeability in aged mice is not caused by changes in brain endothelial cell protein expression.			8	9	8	7	9	9	8	5	5	1
10.1101/2025.03.04.641447	Global brain maintenance predicts well-preserved cognitive function: A pooled analysis of three longitudinal population-based Swedish cohorts	I hypothesise that individuals with lower baseline ventricular volume (relative to intracranial volume) will exhibit better cognitive function over a 7-year follow-up.	I hypothesise that individuals with lower baseline ventricular volume (relative to intracranial volume) will not exhibit better cognitive function over a 7-year follow-up.			8	8	9	7	7	7	7	9	7	1
10.1101/2025.03.13.643061	Topoisomerase IIIb protects from tumorigenesis and immune dysregulation	I hypothesise that Top3b deficiency accelerates lymphoma development in mice by increasing R-loop accumulation.	I hypothesise that Top3b deficiency does not accelerate lymphoma development in mice by decreasing R-loop accumulation.			9	8	8	5	9	8	8	1	7	1
10.1101/2025.03.13.642445	Data-independent acquisition parallel accumulation-serial fragmentation (diaPASEF) analysis of the separated zebrafish lens improves identifications	I hypothesise that specific protein degradation pathways are upregulated in older zebrafish lens nuclear cells compared to cortical cells.	I hypothesise that specific protein degradation pathways are not upregulated in older zebrafish lens nuclear cells compared to cortical cells.			5	7	9	7	7	7	7	5	5	1
10.1101/2025.03.14.643343	A FMRF-amide peptide that regulates cell non-autonomous protein homeostasis in C. elegans.	I hypothesise FLP-17 directly activates EGL-6 to promote UPRER in peripheral tissues.	I hypothesise that FLP-17 does not directly activate EGL-6 to promote UPRER in peripheral tissues.			5	8	1	5	8	9	5	1	5	1
10.1101/2025.03.13.642884	A chromosome-level genome of the King penguin (Aptenodytes patagonicus): an emerging model-in-the-wild for studying evolution	I hypothesise that specific repetitive element classes in the King penguin genome are associated with longevity.	I hypothesise that specific repetitive element classes in the King penguin genome are not associated with longevity.			10	8	1	7	5	9	7	1	5	5
10.1101/2025.03.12.642932	Deletion of RSK2 kinase alleviates age-dependent hypertension	I hypothesise that RSK2 deletion prevents age-dependent increases in peripheral vascular resistance in mice.	I hypothesise that RSK2 deletion does not prevent age-dependent increases in peripheral vascular resistance in mice.			1	10	9	7	7	1	8	5	1	1
10.1101/2025.03.11.642714	Transcriptomic and chromatin accessibility profiling unveils new regulators of heat hormesis in Caenorhabditis elegans	I hypothesise that MARS-1 inhibition will reduce heat hormesis-induced stress resilience in C. elegans.	I hypothesise that MARS-1 inhibition will not reduce heat hormesis-induced stress resilience in C. elegans.			8	8	8	7	7	8	4	9	5	8
10.1101/2025.03.13.643009	Stability of influenza A H5N1 virus in raw milk cheese	I hypothesise that H5N1 virus infectivity in raw milk cheese decreases with decreasing pH during cheese aging.	I hypothesise that H5N1 virus infectivity in raw milk cheese does not decrease with decreasing pH during cheese aging.			5	5	7	7	9	9	9	5	5	5
10.1101/2025.03.12.642822	Meiotic cohesion requires Sirt1 and preserving its activity in aging oocytes reduces missegregation	I hypothesise that Sirt1 activity directly preserves meiotic cohesion in aging oocytes.	I hypothesise that Sirt1 activity does not directly preserve meiotic cohesion in aging oocytes.			8	8	9	7	9	7	8	5	5	5
10.1101/2025.03.13.643076	Viral infections reduce Drosophila lifespan through accelerated aging	I hypothesise that infection with more pathogenic enteric viruses in Drosophila melanogaster causes a greater increase in biological age than infection with less pathogenic viruses.	I hypothesise that infection with more pathogenic enteric viruses in Drosophila melanogaster does not cause a greater increase in biological age than infection with less pathogenic viruses.			8	8	8	9	10	9	8	9	7	5
10.1101/2025.03.11.642575	Envirotyping Facilitates Understanding of Genotype x Environment Interactions and Highlights the Potential of Stay-green Traits in Wheat	I hypothesise that wheat genotypes with a slower senescence rate will exhibit higher yield under water-limited conditions.	I hypothesise that wheat genotypes with a slower senescence rate will not exhibit higher yield under water-limited conditions.			5	8	8	8	7	8	9	2	8	1
10.1101/2025.03.18.643957	Adenosine 2B receptor signaling impairs vaccine-mediated protection against pneumococcal infection in young hosts by blunting neutrophil killing of antibody opsonized bacteria	I hypothesise A2BR signaling impairs neutrophil killing of antibody-opsonized pneumococci in young mice.	I hypothesise that A2BR signaling enhances neutrophil killing of antibody-opsonized pneumococci in young mice.			1	7	8	9	5	7	8	1	5	8
10.1101/2025.03.18.643910	Root hair lifespan is antagonistically controlled by autophagy and programmed cell death	I hypothesise that inhibiting autophagy in root hairs will shorten their lifespan.	I hypothesise that inhibiting autophagy in root hairs will not shorten their lifespan.			8	5	9	7	8	7	7	9	5	8
10.1101/2025.03.18.643760	Ketone Catabolism is Essential for Maintaining Normal Heart Function During Aging	I hypothesise that decreasing cardiac SCOT expression with age causes age-related cardiac dysfunction in female mice.	I hypothesise that decreasing cardiac SCOT expression with age does not cause age-related cardiac dysfunction in female mice.			1	5	7	8	8	8	7	5	5	8
10.1101/2025.03.18.643963	A tumor-suppressive role of the PRC1 Polycomb epigenetic complex in the maintenance of adult Drosophila intestinal stem cell identity	I hypothesise that PRC1 loss in Drosophila ISCs leads to a loss of intestinal stem cell identity.	I hypothesise that PRC1 loss in Drosophila ISCs does not lead to a loss of intestinal stem cell identity.			8	8	8	7	9	8	8	10	1	8
10.1101/2025.03.17.643767	The activation of pentose phosphate pathway flux by hydrogen peroxide is not regulated by NADPH-mediated feedback inhibition	I hypothesise that acute hydrogen peroxide exposure does not deplete cytosolic NADPH in HEK293 cells.	I hypothesise that acute hydrogen peroxide exposure does deplete cytosolic NADPH in HEK293 cells.			8	9	1	8	9	7	5	9	9	1
10.1101/2025.03.18.643988	Lower GABA levels in the posterior cingulate are linked with poorer episodic memory in healthy older adults	I hypothesise that increasing posterior cingulate GABA levels will improve episodic memory performance in older adults.	I hypothesise that increasing posterior cingulate GABA levels will not improve episodic memory performance in older adults.			8	8	7	7	9	8	8	5	5	1
10.1101/2025.03.17.643683	FM-dye inhibition of Piezo2 relieves acute inflammatory and osteoarthritis knee pain in mice of both sexes	I hypothesise FM-dye inhibition of Piezo2 reduces age-related knee osteoarthritis pain in mice.	I hypothesise that FM-dye inhibition of Piezo2 does not reduce age-related knee osteoarthritis pain in mice.			8	8	9	1	7	1	8	5	5	1
10.1101/2025.03.14.643206	Distribution of myogenic stem cell activator, hepatocyte growth factor, in skeletal muscle extracellular matrix and effect of short-term disuse and reloading	I hypothesise that increased HGF nitration in aged muscle ECM impairs satellite cell activation upon reloading.	I hypothesise that increased HGF nitration in aged muscle ECM does not impair satellite cell activation upon reloading.			5	8	8	7	7	7	5	7	5	5
10.1101/2025.03.16.643512	Chronic morphine treatment leads to a global DNA hypomethylation via active and passive demethylation mechanisms in mESCs	I hypothesise that chronic morphine treatment in mESCs leads to decreased Dnmt1 expression, causing global DNA hypomethylation.	I hypothesise that chronic morphine treatment in mESCs does not lead to decreased Dnmt1 expression, preventing global DNA hypomethylation.			5	8	8	5	8	9	7	7	5	1
10.1101/2025.03.15.643430	A spatio-temporal brain miRNA expression atlas identifies sex-independent age-related microglial driven miR-155-5p increase	I hypothesise that inhibiting miR-155-5p in microglia will reduce age-related cognitive decline in mice.	I hypothesise that inhibiting miR-155-5p in microglia will not reduce age-related cognitive decline in mice.			7	5	9	8	7	8	8	1	8	1
10.1101/2025.03.14.643197	Impact of exercise intervention on IGF-1 signaling related to muscle regeneration and physical performance in aged mice	I hypothesise exercise intervention in aged mice upregulates IGF-1 signaling pathways.	I hypothesise that exercise intervention in aged mice does not upregulate IGF-1 signaling pathways.			5	8	9	5	7	9	9	1	8	1
10.1101/2025.03.22.640206	The ganglioside GD3 and its Synthase (ST8SIA1) as novel senescence markers associated with osteoarthritis	I hypothesise that increased ST8SIA1 expression in OA cartilage correlates with higher levels of senescence markers.	I hypothesise that increased ST8SIA1 expression in OA cartilage does not correlate with higher levels of senescence markers.			8	8	8	7	9	8	8	5	5	1
10.1101/2025.03.24.644994	The Distribution of Nitric Oxide-Synthesizing Neurons and Soluble Guanylate Cyclase in the Pigeon Brain	I hypothesise that increased nitric oxide synthesis in the pigeon locus coeruleus correlates with improved spatial learning ability.	I hypothesise that increased nitric oxide synthesis in the pigeon locus coeruleus does not correlate with improved spatial learning ability.			8	9	7	5	8	7	7	7	5	5
10.1101/2025.03.24.645095	Neotenic transcriptomic features in the adult turquoise killifish brain	I hypothesise that inhibiting neotenic gene expression in adult killifish brains will reduce cellular proliferation rates.	I hypothesise that inhibiting neotenic gene expression in adult killifish brains will not reduce cellular proliferation rates.			8	8	8	8	8	9	10	5	7	1
10.1101/2025.03.20.644420	Simultaneous zero echo time fMRI of rat brain and spinal cord	I hypothesise that this dual-FOV fMRI method will reveal age-related functional connectivity changes in both rat brain and spinal cord.	I hypothesise that this dual-FOV fMRI method will not reveal age-related functional connectivity changes in either rat brain or spinal cord.			8	8	9	7	5	7	8	7	8	1
10.1101/2025.03.24.644492	Diurnal dynamics of multilayer brain networks predict cognitive trajectories in aging	I hypothesise that higher theta dynamic integration of the SN and CEN predicts slower memory decline over 7 years in aging adults.	I hypothesise that higher theta dynamic integration of the SN and CEN does not predict slower memory decline over 7 years in aging adults.			1	8	7	8	8	7	8	5	7	5
10.1101/2025.03.20.643891	Resting-State EEG Aperiodic Exponent Moderates the Association Between Age and Memory Performance in Older Adults	I hypothesise that a higher resting-state EEG aperiodic exponent is associated with preserved episodic memory performance in older adults.	I hypothesise that a higher resting-state EEG aperiodic exponent is not associated with preserved episodic memory performance in older adults.			5	8	8	7	7	8	8	5	8	5
10.1101/2025.03.20.644239	Spatial Transcriptomic Signature of Progressive Fibrosis in Human MASLD: Role of Senescence and Metabolic Reprogramming.	I hypothesise that increased immunoglobulin gene expression in MASLD liver biopsies is directly caused by cellular senescence.	I hypothesise that increased immunoglobulin gene expression in MASLD liver biopsies is not directly caused by cellular senescence.			9	8	5	7	8	8	5	9	5	5
10.1101/2025.03.20.644265	Virus-inclusive single-nucleus RNA sequencing reveals two distinct endothelial response patterns in infectious salmon anaemia.	I hypothesise that ISAV infection induces cellular senescence in Atlantic salmon endothelial cells at 16 dpi.	I hypothesise that ISAV infection does not induce cellular senescence in Atlantic salmon endothelial cells at 16 dpi.			8	8	8	6	7	7	1	1	5	1
10.1101/2025.03.20.644150	A Critical Role for Neutral Sphingomyelinase-2 in Doxorubicin-induced Cardiotoxicity	I hypothesise that inhibiting nSMase2 activity will prevent doxorubicin-induced cardiac senescence.	I hypothesise that inhibiting nSMase2 activity will not prevent doxorubicin-induced cardiac senescence.			5	5	10	5	7	7	7	3	1	5
10.1101/2025.03.19.644224	Inhibition of PIKfyve kinase induces senescent cell death by suppressing lysosomal exocytosis and leads to improved outcomes in a mouse model of idiopathic pulmonary fibrosis	I hypothesise PIKfyve kinase inhibition selectively kills senescent cells by blocking lysosomal exocytosis.	I hypothesise that PIKfyve kinase inhibition does not selectively kill senescent cells by blocking lysosomal exocytosis.			8	9	5	1	9	8	10	3	8	1
10.1101/2025.03.19.644135	Increased mRNA translation delays lung adenocarcinoma initiation and exposes a therapeutic vulnerability to MEK inhibitors	I hypothesise that reducing mRNA translation in KRAS-driven lung adenocarcinoma delays tumorigenesis by inducing a senescence-like phenotype.	I hypothesise that reducing mRNA translation in KRAS-driven lung adenocarcinoma does not delay tumorigenesis by inducing a senescence-like phenotype.			7	8	9	1	7	7	8	5	5	1
10.1101/2025.03.19.643361	An unbiased cell-culture selection yields DNA aptamers as novel senescent cell-specific reagents	I hypothesise that the identified DNA aptamers will specifically bind to fibronectin in aged mouse tissues.	I hypothesise that the identified DNA aptamers will not specifically bind to fibronectin in aged mouse tissues.			8	9	8	7	8	5	8	5	5	1
10.1101/2025.03.26.645381	Cortactin regulates metastatic dormancy of circulating tumor cells by suppressing mTOR-dependent senescence	I hypothesise cortactin depletion in circulating tumor cells induces mTOR-dependent senescence.	I hypothesise that cortactin depletion in circulating tumor cells does not induce mTOR-dependent senescence.			7	8	8	1	9	8	3	5	5	1
10.1101/2025.03.27.645766	Re-engineering of acetyl coenzyme A metabolism prevents senescence in budding yeast	I hypothesise that activating AMPK in yeast prevents senescence by increasing mitochondrial acetyl-CoA flux via the glyoxylate cycle and carnitine shuttle.	I hypothesise that activating AMPK in yeast does not prevent senescence by decreasing mitochondrial acetyl-CoA flux via the glyoxylate cycle and carnitine shuttle.			8	8	7	5	9	9	8	1	5	1
10.1101/2025.03.25.645185	SnRK2.4 and SnRK2.10 redundantly control developmental leaf senescence by sustaining ABA production and signaling	I hypothesise that inhibiting SnRK2.4 and SnRK2.10 will delay developmental leaf senescence in Arabidopsis.	I hypothesise that inhibiting SnRK2.4 and SnRK2.10 will not delay developmental leaf senescence in Arabidopsis.			5	10	7	7	8	7	8	7	8	1
10.1101/2025.03.24.645017	Inherited resilience to clonal hematopoiesis by modifying stem cell RNA regulation	I hypothesise that reducing MSI2 expression in hematopoietic stem cells will decrease clonal expansion rates in individuals with somatic mutations associated with clonal hematopoiesis.	I hypothesise that reducing MSI2 expression in hematopoietic stem cells will not decrease clonal expansion rates in individuals with somatic mutations associated with clonal hematopoiesis.			8	8	7	7	8	8	7	5	5	5
10.1101/2025.03.24.645072	SIRT6 activator fucoidan extends healthspan and lifespan in aged wild-type mice	I hypothesise fucoidan administration reduces frailty in aged mice by activating SIRT6 mADPr activity.	I hypothesise that fucoidan administration does not reduce frailty in aged mice by activating SIRT6 mADPr activity.			5	8	6	5	7	7	1	5	5	1
10.1101/2025.03.25.645302	Chronic dietary ingestion of Bacillus thuringiensis spores promotes intestinal inflammation and aging in non-target adult Drosophila	I hypothesise that chronic Bacillus thuringiensis spore ingestion accelerates intestinal aging in Drosophila by increasing reactive oxygen species.	I hypothesise that chronic Bacillus thuringiensis spore ingestion does not accelerate intestinal aging in Drosophila by decreasing reactive oxygen species.			8	9	9	5	7	7	5	7	5	5
10.1101/2025.03.25.645330	Enhancing Brain Age Prediction and Neurodegeneration Detection with Contrastive Learning on Regional Biomechanical Properties	I hypothesise that increased thalamic stiffness is a specific biomarker for Alzheimer's disease detection.	I hypothesise that increased thalamic stiffness is not a specific biomarker for Alzheimer's disease detection.			8	8	8	5	8	9	8	1	5	5
10.1101/2025.03.25.645228	Bisphosphonates Trigger Anti-Ageing Effects Across Multiple Cell Types and Protect Against Senescence	I hypothesise bisphosphonates reduce cellular senescence markers in aged mouse organs.	I hypothesise that bisphosphonates do not reduce cellular senescence markers in aged mouse organs.			8	8	10	9	9	8	7	1	5	1
10.1101/2025.03.25.645040	Rejuvenated human amniotic fluid stem cells: a superior source of standardized induced mesenchymal stem cells for enhanced therapeutic applications	I hypothesise that rejuvenated iMSCs exhibit enhanced osteogenic differentiation compared to parental AFSCs in vitro.	I hypothesise that rejuvenated iMSCs do not exhibit enhanced osteogenic differentiation compared to parental AFSCs in vitro.			9	9	8	7	9	7	8	1	8	5
10.1101/2025.03.24.645057	Depletion of Polypyrimidine tract binding protein 1 (ptbp1) activates Muller glia-derived proliferation during zebrafish retina regeneration via modulation of the senescence secretome	I hypothesise that PTBP1 depletion in zebrafish retina induces Muller glia proliferation by reducing senescence-associated secretory phenotype factors.	I hypothesise that PTBP1 depletion in zebrafish retina does not induce Muller glia proliferation by reducing senescence-associated secretory phenotype factors.			8	8	8	7	8	8	8	5	5	1
10.1101/2025.03.27.642988	Vulnerability to memory decline in aging. A mega-analysis of structural brain change.	I hypothesise that increased hippocampal atrophy is directly correlated with greater episodic memory decline in individuals over 80.	I hypothesise that increased hippocampal atrophy is not directly correlated with greater episodic memory decline in individuals over 80.			8	8	9	1	9	8	9	5	5	5
10.1101/2025.03.28.645885	Loss of H3K9me3 maintenance in human neural progenitor cells leads to transcriptional activation of L1 retrotransposons	I hypothesise that SETDB1 deletion in human neural progenitor cells causes L1 retrotransposon activation.	I hypothesise that SETDB1 deletion in human neural progenitor cells does not cause L1 retrotransposon activation.			8	8	7	5	5	7	10	9	1	1
10.1101/2025.01.22.634250	Exploring the role of transposable elements to sex gap in longevity in Drosophila species	I hypothesise that increased transposable element activity in aging male Drosophila directly reduces their lifespan compared to females.	I hypothesise that increased transposable element activity in aging male Drosophila does not directly reduce their lifespan compared to females.			9	8	7	8	9	9	8	2	1	8
10.1101/2025.01.20.633951	Aging directs the differential evolution of KRAS-driven lung adenocarcinoma	I hypothesise that aged lung microenvironments promote KRAS-driven LUAD evolution towards a stem-like state.	I hypothesise that aged lung microenvironments do not promote KRAS-driven LUAD evolution towards a stem-like state.			8	8	7	8	9	7	8	5	7	1
10.1101/2025.01.23.634563	Dynamic activity of Erg promotes aging of the hematopoietic system	I hypothesise that Erg upregulation during aging drives hematopoietic stem cell myeloid differentiation.	I hypothesise that Erg downregulation during aging does not drive hematopoietic stem cell myeloid differentiation.			5	8	8	8	8	8	8	5	5	1
10.1101/2025.01.22.634263	Demonstrating the need for long inter-stimulus intervals when studying the post-movement beta rebound following a simple button press	I hypothesise that short inter-stimulus intervals (<5s) underestimate post-movement beta rebound magnitude.	I hypothesise that short inter-stimulus intervals (<5s) do not underestimate post-movement beta rebound magnitude.			1	1	8	7	7	8	10	1	8	1
10.1101/2025.01.22.634160	Metabolomics biomarkers of frailty: a longitudinal study of aging female and male mice	I hypothesise that reduced ergothioneine levels predict increased frailty in aging mice.	I hypothesise that reduced ergothioneine levels do not predict increased frailty in aging mice.			5	8	9	5	7	7	8	5	5	5
10.1101/2025.01.19.633537	A method for inducing a senescence trend in mesenchymal stem cells using D-galactose	I hypothesise D-galactose treatment of hUCMSCs reduces their proliferative capacity.	I hypothesise that D-galactose treatment of hUCMSCs does not reduce their proliferative capacity.			8	8	9	7	8	8	9	3	5	8
10.1101/2025.01.17.633444	Oncogenic Stress is a Novel Immunogenic Signal Driven by the Unfolded Protein Response and Detected by Neutrophils	I hypothesise that activating the PERK branch of the UPR in preneoplastic cells increases neutrophil recruitment.	I hypothesise that activating the PERK branch of the UPR in preneoplastic cells decreases neutrophil recruitment.			8	5	9	1	8	7	7	5	5	5
10.1101/2025.03.31.645534	SIRT7 links H3K36ac epigenetic regulation with genome maintenance in the aging mouse testis	I hypothesise that SIRT7 deficiency accelerates germ cell genome damage accumulation in aging mice.	I hypothesise that SIRT7 deficiency does not accelerate germ cell genome damage accumulation in aging mice.			5	8	9	10	8	7	7	5	5	8
10.1101/2025.04.01.644555	Multi-scale mitochondrial cristae remodeling links Opa1 downregulation to reduced OXPHOS capacity in aged hearts	I hypothesise Opa1 downregulation in aged hearts directly causes reduced cristae density and width, impairing OXPHOS capacity.	I hypothesise that Opa1 downregulation in aged hearts does not directly cause reduced cristae density and width, not impairing OXPHOS capacity.			8	8	8	7	7	7	7	5	5	5
10.1101/2025.03.28.645904	Age-associated inflammatory monocytes are increased in menopausal females and reversed by Hormone Replacement Therapy	I hypothesise that Hormone Replacement Therapy (HRT) in peri/menopausal females increases monocyte phagocytosis by restoring C3 serum concentrations.	I hypothesise that Hormone Replacement Therapy (HRT) in peri/menopausal females does not increase monocyte phagocytosis by failing to restore C3 serum concentrations.			8	8	7	8	7	8	9	7	8	1
10.1101/2025.03.31.646397	Senescent cell survival relies on upregulation of lysosomal quality control mechanisms	I hypothesise that inhibiting PI4K2A will induce senescent cell death.	I hypothesise that inhibiting PI4K2A will not induce senescent cell death.			8	8	7	6	9	7	9	1	5	1
10.1101/2025.03.31.646469	Microtubule acetylation is a biomarker of cytoplasmic health during cellular senescence	I hypothesise that increased microtubule acetylation directly causes reduced anterograde Rab6A vesicle transport in senescent cells.	I hypothesise that increased microtubule acetylation does not directly cause reduced anterograde Rab6A vesicle transport in senescent cells.			7	10	8	8	5	7	7	5	5	1
10.1101/2025.03.27.645832	Vascular Biomechanics and Brain Biochemistry in Aged and Alzheimer's Disease Mouse Models	I hypothesise that increased carotid artery circumferential cyclic strain in aged mice correlates with reduced cognitive function.	I hypothesise that increased carotid artery circumferential cyclic strain in aged mice does not correlate with reduced cognitive function.			8	1	8	9	7	7	8	7	5	5
10.1101/2025.03.30.646214	Combined stimuli of elasticity and microgrooves form aligned myotubes that characterize slow-twitch muscles	I hypothesise that reducing substrate elasticity below 10 kPa will further increase MYH7 and MYH2 expression in C2C12 myotubes.	I hypothesise that reducing substrate elasticity below 10 kPa will not further increase MYH7 and MYH2 expression in C2C12 myotubes.			7	8	8	5	7	7	8	8	5	5
10.1101/2025.03.27.645667	Polygenic Associations between Motor Behaviour, Neuromotor Traits, and Active Music Engagement in Four Cohorts	I hypothesise that a higher polygenic score for faster walking pace predicts increased active music engagement.	I hypothesise that a higher polygenic score for faster walking pace does not predict increased active music engagement.			5	8	10	8	8	7	7	1	7	1
10.1101/2025.03.28.645908	Cortical functional connectivity across the adult lifespan and its relation to sensorimotor integration	I hypothesise that decreased alpha-band functional connectivity in older adults impairs sensorimotor integration.	I hypothesise that decreased alpha-band functional connectivity in older adults does not impair sensorimotor integration.			5	9	8	7	8	7	7	5	8	5
10.1101/2025.04.02.646848	Transcriptional dynamics of nitrogen fixation and senescence in soybean nodules: A dual perspective on host and Bradyrhizobium regulation.	I hypothesise that lipoxygenase activity directly promotes soybean nodule senescence.	I hypothesise that lipoxygenase activity does not directly promote soybean nodule senescence.			5	8	9	5	9	7	7	9	1	1
10.1101/2025.04.04.647274	Loofah, a newly characterized adhesion protein, suppresses cell death in long-lived Drosophila hindgut enterocytes	I hypothesise that Loofah protein expression is elevated in aging Drosophila hindgut enterocytes.	I hypothesise that Loofah protein expression is not elevated in aging Drosophila hindgut enterocytes.			1	10	9	5	8	7	1	1	5	1
10.1101/2025.03.30.646199	THE UNCHARTED ROLE OF ERAP2 IN AGING: A BIOINFORMATICS PERSPECTIVE	I hypothesise that reduced ERAP2 expression in aged immune cells impairs antigen presentation.	I hypothesise that reduced ERAP2 expression in aged immune cells does not impair antigen presentation.			9	8	9	7	7	8	8	4	5	5
10.1101/2025.04.02.646889	Brain Network Segregation is Associated with Drug Use Severity in Individuals with Opioid Use Disorder	I hypothesise that reduced brain network segregation in association networks is directly correlated with increased drug use severity in individuals with opioid use disorder.	I hypothesise that reduced brain network segregation in association networks is not directly correlated with increased drug use severity in individuals with opioid use disorder.			8	8	8	7	7	7	8	5	5	5
10.1101/2025.04.03.645994	A non-canonical cGAS-STING pathway drives cellular and organismal aging	I hypothesise that inhibiting the non-canonical cGAS-STING pathway in aged mice will reduce SASP and extend lifespan.	I hypothesise that inhibiting the non-canonical cGAS-STING pathway in aged mice will not reduce SASP and will not extend lifespan.			8	8	8	10	8	9	7	10	8	1
10.1101/2025.03.30.646237	Vascular niches are the primary hotspots for aging within the multicellular architecture of cardiac tissue	I hypothesise that targeting the C3:C3ar1 axis in vascular niches will reduce inflammation and fibrosis in aged mouse hearts.	I hypothesise that targeting the C3:C3ar1 axis in vascular niches will not reduce inflammation and fibrosis in aged mouse hearts.			8	5	8	7	9	9	8	5	8	1
10.1101/2025.03.29.646110	Modification and validation of a GAD-GFP mouse line without accelerated aging-related hearing loss.	I hypothesise that the Gad67-GFP x CBA/CaJ backcross mitigates age-related hearing loss by preserving cochlear hair cell integrity.	I hypothesise that the Gad67-GFP x CBA/CaJ backcross does not mitigate age-related hearing loss by failing to preserve cochlear hair cell integrity.			5	8	1	7	7	9	7	7	8	1
10.1101/2025.04.02.646667	Sleep rescues age-associated loss of glial engulfment	I hypothesise that restoring sleep in aged flies will increase Draper protein levels in glia after axotomy.	I hypothesise that restoring sleep in aged flies will not increase Draper protein levels in glia after axotomy.			5	8	8	7	8	7	7	5	8	1
10.1101/2025.04.01.646152	The Immune-Modulatory Function of Megakaryocytes in the Hematopoietic Niche of Myeloproliferative Neoplasms	I hypothesise that JAK2V617F mutant megakaryocytes promote HSC aging by increasing inflammation.	I hypothesise that JAK2V617F mutant megakaryocytes do not promote HSC aging by increasing inflammation.			7	5	8	5	9	8	8	10	5	1
10.1101/2025.04.01.646696	Long-term iododeoxyuridine labelling analysis finds no evidence of ovarian germline stem cell activity in adult or ageing mice	I hypothesise that adult mouse ovaries lack germline stem cells capable of replenishing the oocyte pool.	I hypothesise that adult mouse ovaries possess germline stem cells capable of replenishing the oocyte pool.			5	8	10	8	7	8	9	7	1	1
10.1101/2025.03.29.646114	Adolescents with major depression featured by sensory-association subtyping show divergent information dynamics and streams	I hypothesise that adolescent MDD subtype 1 exhibits accelerated cellular senescence compared to subtype 2.	I hypothesise that adolescent MDD subtype 1 does not exhibit accelerated cellular senescence compared to subtype 2.			8	8	8	7	8	7	7	5	5	5
10.1101/2025.04.02.646797	Aging reduces excitatory bandwidth, alters spectral tuning curve diversity, and reduces sideband inhibition in L2/3 of primary auditory cortex	I hypothesise that reduced diversity of spectral receptive fields in aging A1 L2/3 neurons impairs auditory information processing.	I hypothesise that reduced diversity of spectral receptive fields in aging A1 L2/3 neurons does not impair auditory information processing.			8	8	8	7	7	8	8	7	7	5
10.1101/2025.04.02.646113	A Milk Fat Globule Membrane-enriched dairy co-product modulates gut Faecalibaculum rodentium metabolism in association with the prevention of cognitive impairment in aging male Wistar rats	I hypothesise that WPPC supplementation increases Faecalibaculum rodentium abundance in aging rats, preventing cognitive decline.	I hypothesise that WPPC supplementation does not increase Faecalibaculum rodentium abundance in aging rats, leading to cognitive decline.			5	8	7	9	8	8	7	7	5	1
10.1101/2025.03.28.645676	Alternative splicing generates a Ribosomal Protein S24 isoform induced by neuroinflammation and neurodegeneration	I hypothesise that increased Rps24c isoform expression in microglia is a direct cause of neuroinflammation in aging brains.	I hypothesise that increased Rps24c isoform expression in microglia does not directly cause neuroinflammation in aging brains.			8	8	9	8	5	8	7	5	5	5
10.1101/2025.04.09.648070	Histone 3 lysine 36 trimethylation by SETD2 shapes an epigenetic landscape in intestinal stem cells to orchestrate lipid metabolism and prevent cell senescence.	I hypothesise that SETD2-mediated H3K36me3 directly regulates FAO genes in intestinal stem cells.	I hypothesise that SETD2-mediated H3K36me3 does not directly regulate FAO genes in intestinal stem cells.			8	8	8	7	8	5	8	5	5	5
10.1101/2025.04.05.647057	Functional MRI Signatures of Autonomic Physiology in Aging	I hypothesise that older adults (ÃƒÆ’Ã‚Â¢ÃƒÂ¢Ã¢â€šÂ¬Ã‚Â°Ãƒâ€šÃ‚Â¥60 years) exhibit significantly faster cardiac fMRI responses compared to younger adults.	I hypothesise that older adults (Ã¢â€°Â¥60 years) do not exhibit significantly faster cardiac fMRI responses compared to younger adults.			1	9	7	9	8	9	3	4	1	1
10.1101/2025.04.03.647024	Langerhans Cells Regulate Tongue Intraepithelial Innervation in a Microbiota- and Age-Dependent Manner	I hypothesise that IL-1ÃƒÆ’Ã…Â½Ãƒâ€šÃ‚Â² from Langerhans cells directly stimulates basal epithelial cells to produce NGF.	I hypothesise that IL-1ÃŽÂ² from Langerhans cells does not directly stimulate basal epithelial cells to produce NGF.			5	8	7	5	8	9	8	1	5	1
10.1101/2025.04.09.645406	Lysosomal cathepsin D regulates bone turnover through distinct mode of actions of the autophagy pathways in osteoblasts and osteoclasts	I hypothesise that CtsD deficiency in osteoblasts impairs differentiation by downregulating LC3B and reducing p-Akt.	I hypothesise that CtsD deficiency in osteoblasts does not impair differentiation by upregulating LC3B and increasing p-Akt.			8	5	8	7	7	8	5	5	5	5
10.1101/2025.04.09.648025	Dual GLP-1 and GIP receptor agonist Tirzapetide plays an off-target role in the modulation of the ÃƒÆ’Ã…Â½Ãƒâ€šÃ‚Â²-adrenoceptors and glucose metabolism in hyperglycemic or senescent cardiac cells	I hypothesise that Tirzepatide treatment reduces cellular senescence markers in cardiac cells by modulating beta-adrenoceptor signaling.	I hypothesise that Tirzepatide treatment does not reduce cellular senescence markers in cardiac cells and does not modulate beta-adrenoceptor signaling.			8	8	7	1	8	8	1	5	5	1
10.1101/2025.04.07.647646	On modeling ovarian aging and menopause timing	I hypothesise that correcting the error in the model will alter predicted menopause age in different populations.	I hypothesise that correcting the error in the model will not alter predicted menopause age in different populations.			8	7	9	7	8	7	1	3	8	9
10.1101/2025.04.08.647760	High-throughput detection and quantification of vitamin B12 in microbiome isolates using Escherichia coli	I hypothesise that increasing vitamin B12 levels in aged Caenorhabditis elegans will improve methionine synthesis and extend lifespan.	I hypothesise that increasing vitamin B12 levels in aged Caenorhabditis elegans will not improve methionine synthesis and will not extend lifespan.			9	8	9	1	8	9	7	10	7	1
10.1101/2025.04.02.646814	DILP8 serves as a mature follicle sensor to prevent excessive accumulation of maturefollicles in Drosophila ovaries and oocyte aging.	I hypothesise that DILP8 directly inhibits ovulation in virgin Drosophila females.	I hypothesise that DILP8 does not directly inhibit ovulation in virgin Drosophila females.			5	8	7	10	7	7	3	1	5	1
10.1101/2025.04.06.646611	Cardiorespiratory fitness and cardiometabolic health are associated with distinct cognitive domains in cognitively healthy older adults.	I hypothesise cardiorespiratory fitness positively correlates with processing speed in older adults.	I hypothesise that cardiorespiratory fitness does not positively correlate with processing speed in older adults.			1	8	9	8	9	7	7	5	8	5
10.1101/2025.04.04.647252	The Physiological Component of the BOLD Signal: Impact of Age and Heart Rate Variability Biofeedback Training	I hypothesise that HRV-BF training in older adults will restore HR-BOLD coupling in autonomic regulation regions to younger adult levels.	I hypothesise that HRV-BF training in older adults will not restore HR-BOLD coupling in autonomic regulation regions to younger adult levels.			5	8	8	10	7	8	7	3	8	5
10.1101/2025.04.01.646687	The Impact of Age and Sex on Cerebral and Large Artery Stiffness and the Response to Pulse Pressure	I hypothesise that young female mice exhibit greater cerebral artery endothelium-dependent dilation impairment after low pulse pressure exposure than young male mice.	I hypothesise that young female mice do not exhibit greater cerebral artery endothelium-dependent dilation impairment after low pulse pressure exposure than young male mice.			8	5	8	8	7	5	5	5	5	5
10.1101/2025.04.04.647279	Aging-dependent dysregulation of EXOSC2 is maintained in cancer as a dependency	I hypothesise that reduced EXOSC2 expression in aged cells causes genomic instability and poor tissue differentiation.	I hypothesise that reduced EXOSC2 expression in aged cells does not cause genomic instability and poor tissue differentiation.			7	8	8	5	7	7	8	5	5	1
10.1101/2025.04.01.646460	Integrated single-cell and spatial multiomic analysis reveals widespread reactivation of developmental programs in diseased human hearts	I hypothesise that reactivation of developmental programs in diseased human hearts is associated with increased cellular senescence.	I hypothesise that reactivation of developmental programs in diseased human hearts is not associated with increased cellular senescence.			8	8	8	7	9	7	8	5	5	8
10.1101/2025.04.09.648008	Multi-Metric Quantitative MRI Identifies Spatially Distinct Age-Related Brain Differences in Female Bonnet Macaques	I hypothesise that integrating diffusion and relaxometry qMRI metrics improves age-related brain region classification accuracy in female bonnet macaques.	I hypothesise that integrating diffusion and relaxometry qMRI metrics does not improve age-related brain region classification accuracy in female bonnet macaques.			1	5	9	9	7	7	2	5	8	5
10.1101/2025.04.09.647903	Accelerated plastic aging in suspension (APAS): A simple, reproducible approach for the generation of model micro- and nanoplastics through simulated environmental forces	I hypothesise that APAS-generated PET nanoplastics induce cellular senescence in endothelial cells.	I hypothesise that APAS-generated PET nanoplastics do not induce cellular senescence in endothelial cells.			8	8	8	8	7	7	7	5	5	1
10.1101/2025.04.09.647857	Insights on Chamelea gallina growth dynamics from the Holocene climate optimum in the Northern Adriatic Sea (Italy)	I hypothesise that warmer sea surface temperatures during the Holocene Climate Optimum reduced Chamelea gallina linear extension rates.	I hypothesise that warmer sea surface temperatures during the Holocene Climate Optimum did not reduce Chamelea gallina linear extension rates.			1	9	8	7	8	9	7	9	5	8
10.1101/2025.04.11.641527	Mosaic accumulation of somatic genetic variation and estimates of age in the long-lived reef-building coral Acropora palmata	I hypothesise that somatic genetic variation accumulation in Acropora palmata is directly proportional to colony age.	I hypothesise that somatic genetic variation accumulation in Acropora palmata is not directly proportional to colony age.			8	9	8	8	8	7	1	8	5	5
10.1101/2025.04.12.648310	Repressive S-adenosylmethionine biosynthesis status inhibits transcription of HeT-A retrotransposon in the germline of Drosophila.	I hypothesise that reducing SAM biosynthesis in Drosophila germline cells will inhibit HeT-A retrotransposon transcription.	I hypothesise that reducing SAM biosynthesis in Drosophila germline cells will not inhibit HeT-A retrotransposon transcription.			8	8	7	7	8	5	8	5	7	5
10.1101/2025.04.11.648484	Temporal shifts in microRNAs signify the inflammatory state of primary murine microglial cells	I hypothesise that ladostigil treatment upregulates miR-27a, miR-27b, and miR-23b in activated murine microglia 8 hours post-activation.	I hypothesise that ladostigil treatment does not upregulate miR-27a, miR-27b, and miR-23b in activated murine microglia 8 hours post-activation.			8	8	1	10	7	5	8	1	5	1
10.1101/2025.04.08.647737	A mouse model of early sporadic tau pathology induces neurogenic plasticity in the hippocampus	I hypothesise that early entorhinal tau pathology increases adult neurogenesis in the dentate gyrus of male mice.	I hypothesise that early entorhinal tau pathology does not increase adult neurogenesis in the dentate gyrus of male mice.			5	8	7	8	7	9	8	5	5	1
10.1101/2025.04.11.648387	Compression of functional gradients from rest to naturalistic processing: Moderation effect of age	I hypothesise that greater compression of functional gradients from rest to naturalistic processing in older adults is associated with reduced cognitive performance.	I hypothesise that greater compression of functional gradients from rest to naturalistic processing in older adults is not associated with reduced cognitive performance.			8	8	8	7	5	7	8	8	5	8
10.1101/2025.04.09.648041	A DNA methylation-based clock for age estimates in the wood mouse (Apodemus sylvaticus)	I hypothesise that hypermethylation of PRC2 target sites in wood mice is associated with accelerated biological ageing.	I hypothesise that hypermethylation of PRC2 target sites in wood mice is not associated with accelerated biological ageing.			5	5	7	1	7	8	7	5	5	5
10.1101/2025.04.11.648478	Stress Granule Formation Drives ZBP1-dependent Necroptosis in Non-obstructive Azoospermia and Aging testes	I hypothesise that inhibiting stress granule formation will prevent ZBP1-dependent necroptosis in aging testes.	I hypothesise that inhibiting stress granule formation will not prevent ZBP1-dependent necroptosis in aging testes.			8	8	8	7	7	7	8	1	1	1
10.1101/2025.04.11.648330	Fibro-Adipogenic Progenitors require autocrine IGF-I in homeostatic and regenerating skeletal muscle	I hypothesise that FAP-specific IGF-I deficiency impairs skeletal muscle regeneration by reducing FAP proliferation.	I hypothesise that FAP-specific IGF-I deficiency does not impair skeletal muscle regeneration by reducing FAP proliferation.			8	8	8	8	8	8	8	5	5	8
10.1101/2025.04.07.647561	Candidate NAMPT modulators from traditional African, Chinese, and Russian medicinal plants	I hypothesise that activating NAMPT with specific plant-derived compounds will increase NAD+ levels in aged cells.	I hypothesise that activating NAMPT with specific plant-derived compounds will not increase NAD+ levels in aged cells.			5	8	8	7	7	9	8	6	8	1
10.1101/2025.04.07.647563	Age-Dependent Mechanisms of Cardiac Hypertrophy Regression Following Exercise in Female Mice	I hypothesise that inhibiting ERK1/2 phosphorylation will reduce exercise-induced cardiac hypertrophy in young female mice.	I hypothesise that inhibiting ERK1/2 phosphorylation will not reduce exercise-induced cardiac hypertrophy in young female mice.			8	1	7	2	7	7	8	5	5	1
10.1101/2025.04.14.648781	Prex1 controls glucose homeostasis by limiting glucose uptake and mitochondrial metabolism in liver through GEF-independent regulation of Gpr21	I hypothesise that Prex1 deficiency increases hepatic glucose uptake and improves glucose homeostasis with aging.	I hypothesise that Prex1 deficiency does not increase hepatic glucose uptake and does not improve glucose homeostasis with aging.			8	8	8	5	8	5	8	1	8	1
10.1101/2025.04.13.648378	Slow Gompertzian aging in long-lived C. elegans results from expansion of decrepitude, not decelerated aging	I hypothesise that reduced Gompertzian beta in long-lived C. elegans is caused by an expansion of the decrepitude phase, not a slower aging rate.	I hypothesise that an expansion of the decrepitude phase does not cause reduced Gompertzian beta in long-lived C. elegans, which is instead due to a slower aging rate.			8	1	1	7	9	5	10	7	5	10
10.1101/2025.04.13.648164	KRAS Inhibition Reverses Chemotherapy Resistance Promoted by Therapy-Induced Senescence-like in Pancreatic Ductal Adenocarcinoma	I hypothesise that KRAS G12D or G12C inhibition sensitizes pancreatic ductal adenocarcinoma cells to gemcitabine by reducing SA-ÃƒÆ’Ã…Â½Ãƒâ€šÃ‚Â²-gal signal.	I hypothesise that KRAS G12D or G12C inhibition does not sensitize pancreatic ductal adenocarcinoma cells to gemcitabine by reducing SA-ÃŽÂ²-gal signal.			5	8	7	3	9	7	8	1	1	1
10.1101/2025.04.17.649382	Real-world testing of the durability claims of a commercially available spray-on surface biocide	I hypothesise that the spray-on biocide SAQAS-A fails to reduce microbial burden on frequently touched surfaces for 30 days when routine cleaning is performed.	I hypothesise that the spray-on biocide SAQAS-A successfully reduces microbial burden on frequently touched surfaces for 30 days when routine cleaning is performed.			8	8	7	7	8	7	5	5	5	5
10.1101/2025.04.11.648417	15-PGDH inhibition promotes hematopoietic recovery and enhances HSC function during aging	I hypothesise that inhibiting 15-PGDH in aged mice will increase hematopoietic stem cell frequency.	I hypothesise that inhibiting 15-PGDH in aged mice will not increase hematopoietic stem cell frequency.			8	8	8	7	7	10	8	5	8	1
10.1101/2025.04.14.648769	Boosting Cellular Longevity Through Intracellular ATP Modulation	I hypothesise that increasing intracellular ATP levels in budding yeast extends lifespan by suppressing catabolic processes.	I hypothesise that increasing intracellular ATP levels in budding yeast does not extend lifespan and does not suppress catabolic processes.			8	9	9	5	9	8	7	5	5	1
10.1101/2025.04.10.648248	Finite element model predicts micromotion-induced strain profiles that correlate with the functional performance of Utah arrays in humans and non-human primates	I hypothesise that reducing micromotion between Utah arrays and cortical tissue will improve long-term BCI functional performance.	I hypothesise that reducing micromotion between Utah arrays and cortical tissue will not improve long-term BCI functional performance.			8	8	9	7	8	9	7	7	8	5
10.1101/2025.04.10.648158	Enhance Memory CD8+ T Cell Formation via Downregulation of Hematopoietic Progenitor Kinase 1 and Sustained Mitochondrial Fitness	I hypothesise that deleting HPK1 in CD8+ T cells enhances their longevity and memory formation.	I hypothesise that deleting HPK1 in CD8+ T cells does not enhance their longevity and memory formation.			8	10	8	7	5	7	7	5	7	5
10.1101/2025.04.10.648269	Posterior parietal cortex activity during visually cued gait: a preliminary study	I hypothesise increased posterior parietal cortex activity during visually cued gait in older adults compared to young adults.	I hypothesise that there is not increased posterior parietal cortex activity during visually cued gait in older adults compared to young adults.			5	8	7	10	9	5	8	8	5	1
10.1101/2025.04.09.648011	Brain Signal Variability During Rest as a Neural Mechanism Underlying Cognitive Reserve	I hypothesise that increased BOLD signal variability in subcortical/medial brain regions is associated with better cognitive function in older adults.	I hypothesise that increased BOLD signal variability in subcortical/medial brain regions is not associated with better cognitive function in older adults.			1	1	8	7	8	1	1	1	8	1
10.1101/2025.04.09.647928	Amyloid fibrils in Alzheimer's disease differently modulate sleep and cortical oscillations in mice depending on the type of amyloid	I hypothesise that A{beta}42 amyloid fibrils in the dentate gyrus cause more sleep disruption than A{beta}40 amyloid fibrils.	I hypothesise that A{beta}42 amyloid fibrils in the dentate gyrus do not cause more sleep disruption than A{beta}40 amyloid fibrils.			8	8	9	4	7	8	8	5	5	5
10.1101/2025.04.18.647076	Single Cell Landscape of Sex-specific Drivers of Alzheimers Disease	I hypothesise that female-specific ADGRV1 expression in neurons is inversely correlated with amyloid-beta load.	I hypothesise that female-specific ADGRV1 expression in neurons is not inversely correlated with amyloid-beta load.			9	9	8	8	9	7	7	5	5	5
10.1101/2025.04.21.648266	Cell-type-specific transposable element demethylation and TAD remodeling in the aging mouse brain	I hypothesise that cell-type-specific demethylation of transposable elements in aging mouse brain non-neuronal cells directly causes increased gene expression.	I hypothesise that cell-type-specific demethylation of transposable elements in aging mouse brain non-neuronal cells does not directly cause increased gene expression.			7	8	7	10	9	9	5	7	5	1
10.1101/2025.04.17.648896	Senescence-induced reparative fibroblasts enable scarless wound healing in aged murine skin.	I hypothesise that Prss35+ fibroblasts are essential for scarless wound healing in aged mice.	I hypothesise that Prss35+ fibroblasts are not essential for scarless wound healing in aged mice.			7	8	7	7	7	7	5	5	5	5
10.1101/2025.04.16.649166	The Magnitude of Telomere Shortening per Cell Division In Vivo: Implications for Lifelong Hematopoiesis in Humans	I hypothesise that reducing the magnitude of telomere shortening per cell division in hematopoietic stem cells will extend human lifespan.	I hypothesise that reducing the magnitude of telomere shortening per cell division in hematopoietic stem cells will not extend human lifespan.			9	8	8	10	8	7	8	5	7	5
10.1101/2025.04.18.649603	Widespread gray and white matter microstructural alterations in dual cognitive-motor impairment	I hypothesise dual cognitive-motor impairment is associated with reduced cellular density in temporal gray matter.	I hypothesise that dual cognitive-motor impairment is not associated with reduced cellular density in temporal gray matter.			8	8	7	7	8	9	8	5	5	5
10.1101/2025.04.16.649223	When Melodies Cue Memories: Electrophysiological Correlates of Autobiographically Salient Music Listening in Older Adults	I hypothesise that older adults will exhibit faster reaction times when identifying autobiographically salient music compared to familiar music.	I hypothesise that older adults will not exhibit faster reaction times when identifying autobiographically salient music compared to familiar music.			1	8	8	7	8	10	8	9	8	1
10.1101/2025.04.19.639742	alms1 regulates the immune response and brain ageing in zebrafish	I hypothesise that alms1 depletion in zebrafish accelerates brain ageing by disrupting glutamatergic synapse function.	I hypothesise that alms1 depletion in zebrafish does not accelerate brain ageing and does not disrupt glutamatergic synapse function.			8	8	8	10	7	7	8	5	5	8
10.1101/2025.04.15.648903	Neurologically altered brain activity may not look like aged brain activity: Implications for brain-age modeling and biomarker strategies	I hypothesise that EEG spectral power in neurological conditions deviates from age-related trends observed in healthy aging.	I hypothesise that EEG spectral power in neurological conditions does not deviate from age-related trends observed in healthy aging.			8	8	9	5	8	9	9	1	8	1
10.1101/2025.04.16.649248	Aging alters mRNA processing in the mouse ovary	I hypothesise that reduced activity of specific RNA-binding proteins causes altered mRNA splicing in aging mouse ovaries.	I hypothesise that reduced activity of specific RNA-binding proteins does not cause altered mRNA splicing in aging mouse ovaries.			10	8	9	7	9	8	8	5	5	1
10.1101/2025.04.15.648884	Theobromine is Associated with Slower Epigenetic Ageing	I hypothesise that increased theobromine intake is associated with reduced epigenetic age acceleration in human blood.	I hypothesise that increased theobromine intake is not associated with reduced epigenetic age acceleration in human blood.			8	8	7	10	8	7	5	3	5	5
10.1101/2025.04.14.648834	Mechanistic Insight of Tardigrade Anhydrobiosis via Protein Structural Analysis	I hypothesise that CAHS protein trimers provide mechanical support to intracellular structures during dehydration.	I hypothesise that CAHS protein trimers do not provide mechanical support to intracellular structures during dehydration.			5	8	8	5	8	8	8	10	8	1
10.1101/2025.04.14.648801	Spatially convergent fMRI signatures of diabetes and male sex identify genetic vulnerabilities to accelerated brain aging	I hypothesise that diabetes accelerates brain aging by increasing insulin-dependent glucose transporter expression in vulnerable brain networks.	I hypothesise that diabetes does not accelerate brain aging by increasing insulin-dependent glucose transporter expression in vulnerable brain networks.			5	9	8	5	8	7	9	5	5	1
10.1101/2025.04.14.648770	Hypertension-Induced Neurovascular and Cognitive Dysfunction at Single-Cell Resolution	I hypothesise that endothelial cell senescence precedes cognitive impairment in angiotensin II-induced hypertension.	I hypothesise that endothelial cell senescence does not precede cognitive impairment in angiotensin II-induced hypertension.			8	9	7	10	7	8	8	5	5	5
10.1101/2025.01.16.633428	Sex does not Influence Neuronal Autophagy throughout Aging in Mice	I hypothesise that male and female mice aged 24 months will show no difference in neuronal autophagosome formation rates.	I hypothesise that male and female mice aged 24 months will show a difference in neuronal autophagosome formation rates.			8	5	9	9	9	9	6	7	5	5
10.1101/2025.01.15.633267	Combining SMN2 splicing modifiers with HDAC6 inhibition greatly improves muscle function and survival in Spinal Muscular Atrophy	I hypothesise that HDAC6 inhibition improves muscle cell proliferation and differentiation in vitro.	I hypothesise that HDAC6 inhibition does not improve muscle cell proliferation and differentiation in vitro.			8	8	8	4	8	9	9	5	8	1
10.1101/2025.01.15.633257	Age and Sex-Specific Changes in Mitochondrial Quality Control in Skeletal and Cardiac Muscle	I hypothesise that increased Parkin expression in aged skeletal muscle leads to reduced mitochondrial content.	I hypothesise that increased Parkin expression in aged skeletal muscle does not lead to reduced mitochondrial content.			8	7	8	6	8	9	5	8	5	8
10.1101/2025.04.22.649344	Multi-cohort, multi-sequence harmonisation for cerebrovascular brain age	I hypothesise that harmonising ASL perfusion MRI data using ASL-specific methods improves cerebrovascular brain age prediction accuracy more than general harmonisation methods.	I hypothesise that harmonising ASL perfusion MRI data using ASL-specific methods does not improve cerebrovascular brain age prediction accuracy more than general harmonisation methods.			8	9	8	7	8	8	8	1	8	5
10.1101/2025.04.22.649924	Familial Alzheimer disease mutation identifies novel role of SORLA in release of neurotrophic exosomes	I hypothesise that SORLA N1358S mutation impairs exosome release by reducing interactions with exosome biogenesis machinery.	I hypothesise that SORLA N1358S mutation does not impair exosome release by enhancing interactions with exosome biogenesis machinery.			8	8	1	10	7	7	8	1	5	8
10.1101/2025.04.23.650230	Targeted chelation therapy decreases NLRP3 expression by vascular cells and acts as senomorphic in Chronic Kidney Disorder induced Vascular Calcification.	I hypothesise that EDTA chelation therapy reduces vascular calcification by decreasing senescent cell accumulation in aortas.	I hypothesise that EDTA chelation therapy does not reduce vascular calcification by decreasing senescent cell accumulation in aortas.			8	8	7	1	7	7	7	1	5	5
10.1101/2025.04.21.649782	Aging changes the underlying mechanism of JAK2 modulation in neutrophil function	I hypothesise JAK2 inhibition reduces neutrophil migration in aged mice more than in young mice.	I hypothesise that JAK2 inhibition does not reduce neutrophil migration in aged mice more than in young mice.			8	8	7	7	9	8	9	7	8	1
10.1101/2025.04.18.649305	Non-DNA-damaging DNA-PK activation improving hearing and prolonging life due to NAD+ and SIRT upregulation	I hypothesise that S-enantiomer of MA-5 improves hearing loss by increasing NAD+ levels.	I hypothesise that the S-enantiomer of MA-5 does not improve hearing loss by decreasing NAD+ levels.			8	8	7	7	7	7	7	1	5	1
10.1101/2025.04.23.647902	Targeting RhoA activity rejuvenates aged hematopoietic stem cells	I hypothesise that inhibiting RhoA activity in aged HSCs will restore youthful H3K9me2 levels.	I hypothesise that inhibiting RhoA activity in aged HSCs will not restore youthful H3K9me2 levels.			8	8	7	7	7	1	8	5	5	1
10.1101/2025.04.19.649672	Cellular Senescence Mediates Doxorubicin Chemotherapy-Induced Vascular Endothelial Dysfunction: Translational Evidence of Prevention with Senolytic Treatment	I hypothesise that doxorubicin induces vascular endothelial dysfunction by promoting cellular senescence.	I hypothesise that doxorubicin does not induce vascular endothelial dysfunction by promoting cellular senescence.			8	9	8	7	8	7	9	5	5	1
10.1101/2025.04.17.649440	Uev1A counteracts oncogenic Ras stimuli in both polyploid and diploid cells	I hypothesise that Uev1A overexpression in diploid cells suppresses oncogenic Ras-driven tumorigenesis by promoting Cyclin A proteasomal degradation.	I hypothesise that Uev1A overexpression in diploid cells does not suppress oncogenic Ras-driven tumorigenesis by promoting Cyclin A proteasomal degradation.			8	8	7	7	8	8	8	5	1	1
10.1101/2025.04.21.649830	RF-SIRF defining reversed DNA replication forks with single-cell and spatio-temporal resolution reveals a replication stress specific epigenetic code	I hypothesise that increased accumulation of reversed DNA replication forks at the nuclear periphery correlates with cellular senescence.	I hypothesise that increased accumulation of reversed DNA replication forks at the nuclear periphery does not correlate with cellular senescence.			8	8	8	5	8	10	7	1	5	1
10.1101/2025.04.21.649824	Early-Life Environmental Exposures Reprogram Epigenomic Aging to Alter Gene Expression Trajectories	I hypothesise early-life exposure to BPA, TBT, TCDD, or PM2.5 accelerates liver aging epigenomic markers in adult mice.	I hypothesise that early-life exposure to BPA, TBT, TCDD, or PM2.5 does not accelerate liver aging epigenomic markers in adult mice.			5	9	8	10	5	7	8	5	5	5
10.1101/2025.04.22.649967	BMAL1 and YAP cooperate to hijack enhancers and promote inflammation in the aged epidermis	I hypothesise that inhibiting the BMAL1-YAP complex will reduce age-associated inflammation in the epidermis.	I hypothesise that inhibiting the BMAL1-YAP complex will not reduce age-associated inflammation in the epidermis.			8	8	7	5	7	8	7	5	8	1
10.1101/2025.04.16.649173	Neuropathological hallmarks during the chronic phase of ischemic stroke in mice and humans	I hypothesise that reducing senescent cell accumulation post-stroke will improve long-term cognitive function.	I hypothesise that reducing senescent cell accumulation post-stroke will not improve long-term cognitive function.			5	5	10	7	7	7	8	5	8	1
10.1101/2025.04.25.650659	Muscle regeneration can be rescued in a telomerase deficient zebrafish model of ageing by MMP inhibition	I hypothesise that inhibiting MMP9/13 activity in aged zebrafish muscle will restore muSC migration and improve regeneration.	I hypothesise that inhibiting MMP9/13 activity in aged zebrafish muscle will not restore muSC migration and will not improve regeneration.			8	8	8	7	8	7	7	5	8	1
10.1101/2025.04.27.650852	Fucoidans are senotherapeutics that enhance SIRT6-dependent DNA repair	I hypothesise that fucoidan treatment in aged mice will reduce the burden of senescent cells in multiple tissues.	I hypothesise that fucoidan treatment in aged mice will not reduce the burden of senescent cells in multiple tissues.			5	8	9	1	8	7	8	5	8	1
10.1101/2025.01.18.631624	Genetically Defined Organoid Models Reveal Mechanisms Driving Squamous Cell Neoplastic Evolution and Identify Potential Therapeutic Vulnerabilities	I hypothesise that ANXA1 deficiency promotes squamous cell carcinoma by suppressing a senescence program.	I hypothesise that ANXA1 deficiency does not promote squamous cell carcinoma by suppressing a senescence program.			9	8	8	8	8	8	8	5	5	1
10.1101/2025.01.17.633634	Epigenetic mechanisms regulating CD8+ T cell senescence in aging humans	I hypothesise that inhibiting AP1, KLF5, and RUNX2 transcription factors will reduce SA-{beta}Gal activity in aged CD8+ T cells.	I hypothesise that inhibiting AP1, KLF5, and RUNX2 transcription factors will not reduce SA-{beta}Gal activity in aged CD8+ T cells.			8	8	9	5	7	7	5	1	5	1
10.1101/2025.01.17.633378	The Impact of a Western Diet High in Phosphate on the CKD-MBD in an Alport Syndrome Model	I hypothesise that a Western high phosphate diet accelerates cellular senescence in wild-type mice.	I hypothesise that a Western high phosphate diet does not accelerate cellular senescence in wild-type mice.			8	8	8	9	8	7	8	5	5	8
10.1101/2025.01.21.633854	Single-cell spatial transcriptome reveals pathological features of human hippocampus with sclerosis	I hypothesise that increased astrocyte density in CA1 and CA3 is a driver of neuronal loss in mesial temporal lobe epilepsy with hippocampal sclerosis.	I hypothesise that increased astrocyte density in CA1 and CA3 is not a driver of neuronal loss in mesial temporal lobe epilepsy with hippocampal sclerosis.			8	8	8	7	7	7	8	5	5	5
10.1101/2025.01.16.633423	Effect of aging, endurance training, and denervation on innate immune signaling in skeletal muscle	I hypothesise that aging increases NLRP3 inflammasome activation in skeletal muscle.	I hypothesise that aging does not increase NLRP3 inflammasome activation in skeletal muscle.			8	1	8	5	5	7	1	9	5	8
10.1101/2025.01.16.633393	High-throughput assessment of exercise-induced adaptations and muscle function in health and ageing	I hypothesise that ClimbMaster-induced endurance exercise in Drosophila mitigates age-related decline in climbing speed.	I hypothesise that ClimbMaster-induced endurance exercise in Drosophila does not mitigate age-related decline in climbing speed.			7	5	8	7	8	9	9	5	8	1
10.1101/2025.01.15.633234	External and Internal Load Profiles of Male and Female Participants during a Walking Football Practice	I hypothesise that female participants in walking football will exhibit a higher average heart rate than males during practice.	I hypothesise that female participants in walking football will not exhibit a higher average heart rate than males during practice.			5	8	7	8	8	7	5	5	5	5
10.1101/2025.01.16.633330	The Brugada syndrome associated gene WT1 impacts on SCN5A expression and cardiac conduction	I hypothesise that increased WT1 protein abundance in human cardiac samples from SCN5A mutation patients directly causes reduced sodium current density.	I hypothesise that increased WT1 protein abundance in human cardiac samples from SCN5A mutation patients does not directly cause reduced sodium current density.			8	8	8	7	5	7	7	1	5	5
10.1101/2025.01.17.633563	Chameau (HBO1) regulates starvation in a temperature-dependent manner in Drosophila melanogaster	I hypothesise that reducing Chameau expression in Drosophila melanogaster decreases starvation resilience at 23ÃƒÆ’Ã¢â‚¬Å¡Ãƒâ€šÃ‚Â°C but not at 25ÃƒÆ’Ã¢â‚¬Å¡Ãƒâ€šÃ‚Â°C.	I hypothesise that reducing Chameau expression in Drosophila melanogaster does not decrease starvation resilience at 23Ã‚Â°C but does at 25Ã‚Â°C.			5	8	10	7	8	9	7	7	5	5
10.1101/2025.01.16.633464	Constitutive expression of cardiomyocyte Klf9 precipitates metabolic dysfunction and spontaneous heart failure.	I hypothesise that constitutive Klf9 overexpression in cardiomyocytes directly impairs mitochondrial complex I activity.	I hypothesise that constitutive Klf9 overexpression in cardiomyocytes does not directly impair mitochondrial complex I activity.			8	8	7	8	8	9	5	9	5	9
10.1101/2025.04.29.651205	A distinct subset of stem-cell memory is poised for the cytotoxicity program in CD4+ T cells in humans.	I hypothesise that the TSCM-CTL subset exhibits increased longevity compared to other CD4+ T cell memory subsets.	I hypothesise that the TSCM-CTL subset does not exhibit increased longevity compared to other CD4+ T cell memory subsets.			5	8	8	7	8	7	7	5	7	5
10.1101/2025.04.29.651231	SNRK3.15 is a crucial component of the sulfur deprivation response in Arabidopsis thaliana	I hypothesise that SNRK3.15 deficiency accelerates nutrient deficiency induced senescence in Arabidopsis thaliana under sulfur deprivation.	I hypothesise that SNRK3.15 deficiency does not accelerate nutrient deficiency induced senescence in Arabidopsis thaliana under sulfur deprivation.			8	5	9	7	7	9	8	5	5	5
10.1101/2025.04.29.651293	Frontal Vulnerability vs. Temporal Resilience: Neuro-compensatory mechanisms underline differential language aging trajectories	I hypothesise that preserved temporal lobe connectivity in aging adults directly compensates for age-related structural decline in frontal language networks.	I hypothesise that preserved temporal lobe connectivity in aging adults does not directly compensate for age-related structural decline in frontal language networks.			8	8	7	7	7	9	7	5	5	5
10.1101/2025.04.28.651132	Brain Network Analysis in Alzheimer's Disease and Mild Cognitive Impairment using High-Density Diffuse Optical Tomography	I hypothesise that increased prefrontal cortex network density in MCI and AD patients is associated with accelerated cognitive decline.	I hypothesise that increased prefrontal cortex network density in MCI and AD patients is not associated with accelerated cognitive decline.			8	8	7	7	9	8	4	7	5	1
10.1101/2025.05.01.651310	Human life expectancies are still rising	I hypothesise that human lifespans will continue to increase linearly globally.	I hypothesise that human lifespans will not continue to increase linearly globally.			8	8	10	7	7	7	5	5	5	5
10.1101/2025.04.30.651445	The China Brain Multi-omics Atlas Project (CBMAP)	I hypothesise that specific epigenetic modifications increase with age in East Asian brain regions.	I hypothesise that specific epigenetic modifications do not increase with age in East Asian brain regions.			8	10	8	7	7	7	7	5	5	1
10.1101/2025.04.28.650949	Changing cognitive chimera states in human brain networks with age: Variations in cognitive integration and segregation	I hypothesise that increased chimera state flexibility in older adults is directly correlated with preserved cognitive function.	I hypothesise that increased chimera state flexibility in older adults is not directly correlated with preserved cognitive function.			5	8	7	5	10	7	7	5	7	5
10.1101/2025.04.29.649991	Typhoid toxin of Salmonella enterica induces ISG15 response mediating host cell survival and bacterial dissemination	I hypothesise that ISG15 deficiency exacerbates typhoid toxin-induced cellular senescence.	I hypothesise that ISG15 deficiency does not exacerbate typhoid toxin-induced cellular senescence.			8	8	9	7	7	7	8	1	5	5
10.1101/2025.04.23.650173	Heparan sulfate glycosaminoglycans mediate CXCL4 (PF4) transport across the blood-brain barrier and effects on neurogenesis	I hypothesise that blocking heparan sulfate GAGs on the BBB endothelial glycocalyx will reduce CXCL4 brain parenchyma entry.	I hypothesise that blocking heparan sulfate GAGs on the BBB endothelial glycocalyx will not reduce CXCL4 brain parenchyma entry.			8	1	7	5	8	7	7	7	5	5
10.1101/2025.04.25.650657	Sex-lethal is recruited to chromatin to promote neuronal tRNA synthesis in males through RNA Polymerase III regulation	I hypothesise that Sxl depletion in aged male Drosophila neurons improves negative geotaxis by increasing tRNA synthesis.	I hypothesise that Sxl depletion in aged male Drosophila neurons does not improve negative geotaxis by increasing tRNA synthesis.			8	10	9	1	7	7	5	5	1	1
10.1101/2025.04.28.651123	A Multi-Organ Murine Metabolomics Atlas Reveals Molecular Dysregulations in Alzheimer's Disease	I hypothesise that elevated phenylacetyl-carnitine levels in AD patients are causally linked to increased oxidative stress and mitochondrial dysfunction.	I hypothesise that elevated phenylacetyl-carnitine levels in AD patients are not causally linked to increased oxidative stress and mitochondrial dysfunction.			10	8	7	7	5	7	8	5	5	1
10.1101/2025.04.25.650585	The response of the skeletal muscle transcriptome to exercise in chronic kidney disease	I hypothesise that aerobic exercise in CKD patients upregulates CHI3L1 expression in skeletal muscle.	I hypothesise that aerobic exercise in CKD patients does not upregulate CHI3L1 expression in skeletal muscle.			8	8	8	8	7	7	8	10	5	8
10.1101/2025.05.07.652642	Algal Betaine Triggers Bacterial Hydrogen Peroxide Production that Promotes Algal Demise	I hypothesise that increasing betaine concentration will accelerate Emiliania huxleyi cell death.	I hypothesise that increasing betaine concentration will not accelerate Emiliania huxleyi cell death.			8	8	8	7	7	7	10	8	1	1
10.1101/2025.05.01.651195	Alzheimer's disease risk gene Wwox protects against amyloid pathology through metabolic reprogramming	I hypothesise that WWOX upregulation in aged cells will reduce markers of cellular senescence.	I hypothesise that WWOX downregulation in aged cells will not reduce markers of cellular senescence.			8	8	9	7	8	7	8	5	5	1
10.1101/2025.05.03.651604	Chronic nicotine treatment enhanced cognition and reduced neuroinflammation in the gp120 transgenic mouse model of neuroHIV	I hypothesise chronic nicotine treatment reduces Iba-1 expression in gp120-Tg mice.	I hypothesise that chronic nicotine treatment does not reduce Iba-1 expression in gp120-Tg mice.			8	9	8	8	7	7	8	5	5	1
10.1101/2025.05.07.648438	A human and mouse subpopulation of senescent ÃƒÆ’Ã…Â½Ãƒâ€šÃ‚Â²-cells induces pathologic dysfunction through targetable paracrine signaling	I hypothesise that a subset of four SASP factors from Cdkn1a+ senescent beta-cells induces secondary senescence in neighbouring beta-cells.	I hypothesise that a subset of four SASP factors from Cdkn1a+ senescent beta-cells does not induce secondary senescence in neighbouring beta-cells.			8	9	5	5	9	8	8	5	5	8
10.1101/2025.05.06.650963	Autophagy selectively clears ER in inflammation-induced muscle atrophy	I hypothesise that inhibiting ER-phagy receptors Tex264 and Calcoco1 will prevent inflammation-induced muscle atrophy.	I hypothesise that inhibiting ER-phagy receptors Tex264 and Calcoco1 will not prevent inflammation-induced muscle atrophy.			8	8	8	7	8	8	8	5	5	5
10.1101/2025.04.30.651499	NMNAT1 Binding at Promoters and Enhancers Couples NAD+ Synthesis to RNA Polymerase II Engagement	I hypothesise that NMNAT1 knockout cells exhibit reduced RNA Polymerase II occupancy at DNA replication gene promoters.	I hypothesise that NMNAT1 knockout cells do not exhibit reduced RNA Polymerase II occupancy at DNA replication gene promoters.			8	1	9	9	9	9	5	7	5	1
10.1101/2025.04.30.651556	Parental age selection in C. elegans influences progeny stress resistance capacity	I hypothesise that C. elegans progeny from late parental selection exhibit reduced oxidative stress resistance due to SKN-1 pathway activation.	I hypothesise that C. elegans progeny from late parental selection do not exhibit reduced oxidative stress resistance due to SKN-1 pathway activation.			8	8	8	5	7	7	8	7	5	5
10.1101/2025.04.30.651528	Antiviral CD4+ T and myeloid cell responses to influenza vaccines are attenuated in older adults	I hypothesise that enhancing myeloid cell interferon signaling will restore antiviral CD4+ T cell responses to influenza vaccines in older adults.	I hypothesise that enhancing myeloid cell interferon signaling will not restore antiviral CD4+ T cell responses to influenza vaccines in older adults.			8	8	8	1	7	8	8	3	7	5
10.1101/2025.04.30.651418	Brain glucodynamic variability is an essential feature of the metabolism-cognition relationship	I hypothesise that increasing glucodynamic variability in older adults will improve cognitive performance.	I hypothesise that increasing glucodynamic variability in older adults will not improve cognitive performance.			1	8	7	10	7	8	8	5	5	5
10.1101/2025.05.04.652106	An Aged Microenvironment Increases CAR T Cell Cytotoxicity but Impairs Therapeutic Efficacy	I hypothesise that aged microenvironments induce constitutive degranulation in CAR T cells, leading to non-specific cytotoxicity.	I hypothesise that aged microenvironments do not induce constitutive degranulation in CAR T cells, leading to specific cytotoxicity.			5	5	9	6	5	7	8	5	1	5
10.1101/2025.05.03.651968	Compensating Cortical Thickness for Cortical Folding-Related Variation	I hypothesise that the novel folding-compensated cortical thickness measure will show a stronger correlation with cognitive decline in older adults than standard cortical thickness.	I hypothesise that the novel folding-compensated cortical thickness measure will not show a stronger correlation with cognitive decline in older adults than standard cortical thickness.			5	8	9	7	9	10	9	5	8	5
10.1101/2025.04.29.651052	Lamin A/C Deficiency Drives Genomic Instability and Poor Survival in Small-Cell Lung Cancer through Increased R-loop Accumulation	I hypothesise that LMNA depletion in SCLC cells increases R-loop accumulation, leading to DNA breaks.	I hypothesise that LMNA depletion in SCLC cells does not increase R-loop accumulation, leading to no DNA breaks.			5	8	8	5	7	7	7	5	7	1
10.1101/2025.05.01.651794	Mitorubin, berberrubine-based compounds that improve mitochondrial function, exhibit cardioprotective effects against age-related cardiac dysfunction	I hypothesise Mitorubin administration increases MITOL expression in aged mouse hearts, improving mitochondrial respiration.	I hypothesise that Mitorubin administration does not increase MITOL expression in aged mouse hearts, worsening mitochondrial respiration.			5	8	9	7	7	7	5	5	8	5
10.1101/2025.05.09.653223	Imputation integrates single-cell and spatial gene expression data to resolve transcriptional networks in barley shoot meristem development	I hypothesise that specific gene regulatory networks are responsible for the differential longevity of barley meristems.	I hypothesise that specific gene regulatory networks are not responsible for the differential longevity of barley meristems.			8	10	9	7	7	9	8	7	5	1
10.1101/2025.05.09.652066	Characterization of hyperoxia-induced senescent lung macrophages in neonatal mice	I hypothesise that M1 and alveolar macrophages in hyperoxia-induced senescent lungs exhibit increased glycolysis.	I hypothesise that M1 and alveolar macrophages in hyperoxia-induced senescent lungs do not exhibit increased glycolysis.			8	8	8	5	7	7	8	7	5	1
10.1101/2025.05.08.652049	Spatial Richness of Neural Magnetic Fields	I hypothesise that neural magnetic field sensing will improve implant longevity compared to electrical potential sensing.	I hypothesise that neural magnetic field sensing will not improve implant longevity compared to electrical potential sensing.			8	8	9	10	8	9	5	5	8	5
10.1101/2025.05.08.652966	The Aging Microenvironment as a Determinant of Immune Exclusion and Metastatic Fate in Pancreatic Cancer	I hypothesise that aged CAFs in PDAC promote immune exclusion by upregulating specific extracellular matrix genes.	I hypothesise that aged CAFs in PDAC do not promote immune exclusion by upregulating specific extracellular matrix genes.			5	8	9	1	9	9	10	7	5	1
10.1101/2025.05.05.652251	ÃƒÆ’Ã…Â½Ãƒâ€šÃ‚Â³ÃƒÆ’Ã…Â½Ãƒâ€šÃ‚Â´ T Cells Target and Ablate Senescent Cells in Aging and Alleviate Pulmonary Fibrosis	I hypothesise that increasing ÃƒÆ’Ã…Â½Ãƒâ€šÃ‚Â³ÃƒÆ’Ã…Â½Ãƒâ€šÃ‚Â´ T cell activity will reduce senescent cell burden in aging tissues.	I hypothesise that increasing ÃƒÆ’Ã…Â½Ãƒâ€šÃ‚Â³ÃƒÆ’Ã…Â½Ãƒâ€šÃ‚Â´ T cell activity will not reduce senescent cell burden in aging tissues.			9	8	9	7	7	8	9	5	8	1
10.1101/2025.05.05.652234	SRSF3 knockdown-induced cellular senescence as a possible therapeutic strategy for non-small cell lung cancer	I hypothesise SRSF3 knockdown induces cellular senescence in NSCLC cells by downregulating TOP2A.	I hypothesise that SRSF3 knockdown does not induce cellular senescence in NSCLC cells by downregulating TOP2A.			8	7	8	1	8	9	8	5	5	1
10.1101/2025.05.04.652087	The hypoxic response extends lifespan through a bioaminergic and peptidergic neural circuit.	I hypothesise that activating HIF-1 signaling in ADF neurons extends C. elegans lifespan.	I hypothesise that activating HIF-1 signaling in ADF neurons does not extend C. elegans lifespan.			8	8	7	7	7	5	8	1	8	1
10.1101/2025.05.03.652034	Ischemic Injury Drives Tumor Growth via Accelerated Hematopoietic Aging	I hypothesise that inhibiting the NLRP3 inflammasome in hematopoietic stem cells will reduce ischemia-driven tumor growth.	I hypothesise that inhibiting the NLRP3 inflammasome in hematopoietic stem cells will not reduce ischemia-driven tumor growth.			8	5	8	7	7	7	8	5	7	1
10.1101/2025.05.03.652051	Impact of inhibitors of histone post-translational modifications on lifespan, reproduction, and stress response in the rotifer Brachionus manjavacas	I hypothesise that inhibiting HDACs with beta-hydroxybutyrate extends rotifer lifespan by mechanisms independent of heat stress resistance.	I hypothesise that inhibiting HDACs with beta-hydroxybutyrate does not extend rotifer lifespan by mechanisms independent of heat stress resistance.			9	8	8	7	8	7	7	7	5	1
10.1101/2025.05.08.651477	HIV infection in microglia leads to senescence, triggering activation of neurotoxicity pathways	I hypothesise HIV infection of microglia induces cellular senescence, leading to increased p53 pathway activation.	I hypothesise that HIV infection of microglia does not induce cellular senescence, leading to decreased p53 pathway activation.			8	8	9	8	7	9	8	5	5	5
10.1101/2025.05.04.652093	Spatiotemporal profiling reveals the impact of caloric restriction on mammalian brain aging	I hypothesise caloric restriction reduces senescence-associated gene expression in mouse brain ventricles and white matter.	I hypothesise that caloric restriction does not reduce senescence-associated gene expression in mouse brain ventricles and white matter.			8	8	8	7	7	9	8	5	8	1
10.1101/2025.05.02.651937	EnrichSci: Transcript-guided Targeted Cell Enrichment for Scalable Single-Cell RNA Sequencing	I hypothesise that EnrichSci can identify novel aging-associated molecular dynamics in oligodendrocyte subtypes of the mouse brain.	I hypothesise that EnrichSci cannot identify novel aging-associated molecular dynamics in oligodendrocyte subtypes of the mouse brain.			8	8	8	8	7	7	8	7	8	1
10.1101/2025.05.12.653430	The plant-time-bender model: predicting yield through wheat's perception of time	I hypothesise that reducing vapor pressure deficit sensitivity during senescence increases wheat yield stability.	I hypothesise that reducing vapor pressure deficit sensitivity during senescence does not increase wheat yield stability.			8	8	8	5	8	8	8	8	5	1
10.1101/2025.05.12.653388	Anti-amyloid beta therapy resolves stroke recovery impairment caused by Alzheimer's disease	I hypothesise that anti-amyloid beta antibodies improve stroke recovery by preventing malignant myeloid immunity.	I hypothesise that anti-amyloid beta antibodies do not improve stroke recovery by preventing malignant myeloid immunity.			5	8	7	1	8	9	8	5	8	1
10.1101/2025.05.12.653376	Organism-wide cellular dynamics and epigenomic remodeling in mammalian aging	I hypothesise that increased plasma cells and macrophages in aging mammals are driven by systemic inflammatory signals.	I hypothesise that increased plasma cells and macrophages in aging mammals are not driven by systemic inflammatory signals.			8	8	9	8	8	8	8	8	7	1
10.1101/2025.05.11.653363	The broccoli derivative sulforaphane extends lifespan by slowing the transcriptional aging clock	I hypothesise that early-life sulforaphane treatment in C. elegans significantly reduces the rate of transcriptional aging compared to untreated controls.	I hypothesise that early-life sulforaphane treatment in C. elegans does not significantly reduce the rate of transcriptional aging compared to untreated controls.			5	8	9	7	9	8	7	5	8	1
10.1101/2025.05.13.653730	Single-cell RNA sequencing reveals distinct senotypes and a quiescence-senescence continuum at the transcriptome level following chemotherapy	I hypothesise that specific transcriptomic signatures differentiate quiescent from senescent cells after chemotherapy.	I hypothesise that specific transcriptomic signatures do not differentiate quiescent from senescent cells after chemotherapy.			1	8	10	7	9	5	8	5	5	1
10.1101/2025.05.13.653863	Basal autophagy during meiotic prophase I is required for accurate chromosome segregation in Drosophila oocytes and declines during oocyte aging	I hypothesise that reducing basal autophagy in aging Drosophila oocytes will increase chromosome segregation errors.	I hypothesise that reducing basal autophagy in aging Drosophila oocytes will not increase chromosome segregation errors.			8	9	8	8	9	8	8	1	5	1
10.1101/2025.05.08.652978	Smooth muscle LRRC8A knockout preserves vascular function in AngII hypertension	I hypothesise LRRC8A knockout preserves vascular function in AngII hypertension by reducing VSMC proliferation and senescence markers.	I hypothesise that LRRC8A knockout does not preserve vascular function in AngII hypertension by reducing VSMC proliferation and senescence markers.			8	10	9	1	9	9	5	1	5	5
10.1101/2025.05.12.653532	SIRT4 Controls Macrophage Function and Wound Healing through Control of Protein Itaconylation in Mice	I hypothesise that SIRT4 deficiency accelerates aging phenotypes in mice due to dysregulated macrophage function.	I hypothesise that SIRT4 deficiency does not accelerate aging phenotypes in mice due to regulated macrophage function.			8	8	4	8	8	8	7	5	5	8
10.1101/2025.05.07.652777	miR-486-3p ameliorates aging-related impaired angiogenesis in adult moyamoya disease by targeting Forkhead Box O4	I hypothesise that increasing miR-486-3p levels in senescent endothelial cells will restore their angiogenic potential.	I hypothesise that increasing miR-486-3p levels in senescent endothelial cells will not restore their angiogenic potential.			5	8	8	7	7	7	8	5	8	5
10.1101/2025.05.06.652518	Vessels hiding in plain sight: quantifying brain vascular morphology in anatomical MR images using deep learning	I hypothesise that anat2vessels-derived brain vascular morphology features predict cognitive decline in aging individuals.	I hypothesise that anat2vessels-derived brain vascular morphology features do not predict cognitive decline in aging individuals.			5	9	9	9	7	7	8	7	7	5
10.1101/2025.05.06.652445	Histology to MRI registration quality of ex vivo human brain blocks fixed with solutions used in anatomy laboratories	I hypothesise that SSS fixation reduces MRI-histology registration quality by decreasing grey-white matter contrast.	I hypothesise that SSS fixation does not reduce MRI-histology registration quality by decreasing grey-white matter contrast.			10	8	9	10	8	7	5	8	5	8
10.1101/2025.05.11.653350	Validation of Gentamicin and Streptomycin Stability for On-Orbit Microbial Monitoring	I hypothesise that gentamicin and streptomycin in agar plates stored at 4ÃƒÆ’Ã¢â‚¬Å¡Ãƒâ€šÃ‚Â°C for over 6.5 months will retain sufficient bactericidal activity to select for antibiotic-resistant bacteria.	I hypothesise that gentamicin and streptomycin in agar plates stored at 4Ã‚Â°C for over 6.5 months will not retain sufficient bactericidal activity to select for antibiotic-resistant bacteria.			8	9	8	10	8	9	9	9	5	1
10.1101/2025.01.13.632607	Tissue-specific effects of dietary protein on cellular senescence are mediated by branched-chain amino acids	I hypothesise that reducing dietary branched-chain amino acids protects mice from high protein diet-induced hepatic cellular senescence.	I hypothesise that reducing dietary branched-chain amino acids does not protect mice from high protein diet-induced hepatic cellular senescence.			8	8	9	7	8	8	8	7	5	5
10.1101/2025.01.13.632801	Molecular hallmarks of excitatory and inhibitory neuronal resilience and resistance to Alzheimer's disease	I hypothesise that downregulation of Hsp90 in excitatory neurons is sufficient to confer cognitive resilience in Alzheimer's disease.	I hypothesise that downregulation of Hsp90 in excitatory neurons is not sufficient to confer cognitive resilience in Alzheimer's disease.			8	8	7	8	8	7	7	3	5	5
10.1101/2025.01.10.632406	Local delivery of SBRT and IL-12 to Murine PDAC Tumors Modulates Hematopoiesis	I hypothesise that SBRT/IL-12 treatment of PDAC tumors causes premature aging of bone marrow hematopoietic stem cells.	I hypothesise that SBRT/IL-12 treatment of PDAC tumors does not cause premature aging of bone marrow hematopoietic stem cells.			7	8	5	9	10	8	5	9	5	8
10.1101/2025.05.18.654737	Unique TMJ-specific transcriptomic signature and its medial layer: Implications in osteoarthritis	I hypothesise that increased expression of Mmp13, Postn, and Col1a1 in TMJ cartilage contributes to its higher vulnerability to osteoarthritis.	I hypothesise that increased expression of Mmp13, Postn, and Col1a1 in TMJ cartilage does not contribute to its higher vulnerability to osteoarthritis.			8	10	8	7	7	9	5	5	5	1
10.1101/2025.05.14.654139	The insidious degeneration of white matter and cognitive decline in Fabry disease	I hypothesise that glycolipid accumulation in Fabry disease directly causes white matter microstructural damage.	I hypothesise that glycolipid accumulation in Fabry disease does not directly cause white matter microstructural damage.			8	8	7	9	8	7	8	8	5	1
10.1101/2025.05.13.653838	sKL/mKL Transcript Ratio and Protein Localization Define a Species- and Region-Specific Klotho Signature in the CNS and AD Progression	I hypothesise that reduced s-KL levels in human CSF correlate with increased Alzheimer's disease severity.	I hypothesise that reduced s-KL levels in human CSF do not correlate with increased Alzheimer's disease severity.			8	8	7	7	7	7	9	10	8	1
10.1101/2025.05.13.653849	Glucagon receptor signaling is indispensable for the healthspan effects of caloric restriction in aging male mice	I hypothesise that glucagon receptor signaling is required for caloric restriction to improve metabolic health in aging mice.	I hypothesise that glucagon receptor signaling is not required for caloric restriction to improve metabolic health in aging mice.			8	9	8	8	8	8	8	3	1	8
10.1101/2025.05.16.654309	Multimodal cortical connectome in the default mode network across the adult lifespan	I hypothesise that increased theta-band coupling in the prefrontal cortex is associated with better memory performance in older adults.	I hypothesise that increased theta-band coupling in the prefrontal cortex is not associated with better memory performance in older adults.			5	8	8	7	7	7	7	7	8	1
10.1101/2025.05.13.653770	Old mice have a functionally distinct contractile reserve from obese mice	I hypothesise that old mice exhibit a greater reduction in cardiac output under dobutamine stimulation compared to obese mice.	I hypothesise that old mice do not exhibit a greater reduction in cardiac output under dobutamine stimulation compared to obese mice.			8	5	9	8	8	8	8	7	1	1
10.1101/2025.05.13.653823	Cellular Senescence Mediates Doxorubicin Chemotherapy-Induced Aortic Stiffening: Role of Glycation Stress	I hypothesise that doxorubicin treatment increases aortic pulse-wave velocity by inducing cellular senescence.	I hypothesise that doxorubicin treatment does not increase aortic pulse-wave velocity by inducing cellular senescence.			5	8	8	7	7	8	8	1	5	1
10.1101/2025.05.13.653662	NETSseq Reveals Inflammatory and Aging Mechanisms in Distinct Cell Types Driving Cerebellar Decline in Ataxia Telangiectasia	I hypothesise that astrocytes in A-T cerebella exhibit accelerated aging signatures, contributing to neurotoxicity.	I hypothesise that astrocytes in A-T cerebella do not exhibit accelerated aging signatures, not contributing to neurotoxicity.			7	7	9	7	5	7	8	1	5	1
10.1101/2025.05.12.653474	Frontoparietal functional dedifferentiation during naturalistic movie watching among older adults at risk of emotional vulnerability	I hypothesise that increased frontoparietal network functional dispersion in older adults predicts greater emotion regulation difficulties.	I hypothesise that increased frontoparietal network functional dispersion in older adults does not predict greater emotion regulation difficulties.			8	8	8	7	7	7	10	2	5	5
10.1101/2025.05.12.653466	Experimental evidence for reproduction to increase mitochondrial respiration, but decrease mitochondrial efficiency, in females of a short-lived bird	I hypothesise that increased proton leak in reproductive female quail is an adaptive mechanism to reduce reactive oxygen species production.	I hypothesise that increased proton leak in reproductive female quail is not an adaptive mechanism to reduce reactive oxygen species production.			5	8	8	8	7	5	8	1	5	1
10.1101/2025.05.19.654885	SIRT1 limits neuronal fate following DNA damage	I hypothesise that inhibiting SIRT1 in neural stem cells with DNA damage will increase neuronal differentiation.	I hypothesise that inhibiting SIRT1 in neural stem cells with DNA damage will not increase neuronal differentiation.			8	9	7	5	7	7	1	5	5	1
10.1101/2025.05.14.654143	Classical Myelo-Proliferative Neoplasms emergence and development based on real life incidence and mathematical modeling	I hypothesise that the rate of JAK2V617F mutation emergence in myeloproliferative neoplasms increases exponentially with age.	I hypothesise that the rate of JAK2V617F mutation emergence in myeloproliferative neoplasms does not increase exponentially with age.			8	8	5	8	9	9	8	1	5	5
10.1101/2025.05.16.654624	Dietary glutamine supplementation alleviates age-related cardiac dysfunction by reducing elevated H3K27me3	I hypothesise that dietary glutamine supplementation reduces H3K27me3 levels in aged human cardiomyocytes.	I hypothesise that dietary glutamine supplementation does not reduce H3K27me3 levels in aged human cardiomyocytes.			8	8	1	10	8	7	7	1	5	5
10.1101/2025.05.16.654528	ER-Localized Ceramide Accumulation Due to Disrupted CERT Transport Contributes to Replicative Senescence	I hypothesise that inhibiting CERT activity accelerates replicative senescence in human fibroblasts.	I hypothesise that inhibiting CERT activity does not accelerate replicative senescence in human fibroblasts.			1	8	9	7	7	7	5	7	5	1
10.1101/2025.05.15.654386	Telomerase reverse transcriptase is required for resistance to mycobacterial infection	I hypothesise that Tert depletion in zebrafish embryos increases Mycobacterium marinum bacterial burden by impairing emergency myelopoiesis.	I hypothesise that Tert depletion in zebrafish embryos does not increase Mycobacterium marinum bacterial burden by impairing emergency myelopoiesis.			1	8	8	9	5	8	7	5	5	1
10.1101/2025.01.15.633217	Differential Left and Right Carotid Artery Blood Flow and Altered Hippocampal Mitochondrial Function After Transverse Aortic Constriction in Aging Rats.	I hypothesise that high carotid artery blood flow pulsatility impairs hippocampal mitochondrial respiration in aging rats.	I hypothesise that high carotid artery blood flow pulsatility does not impair hippocampal mitochondrial respiration in aging rats.			5	1	7	1	8	9	8	7	5	8
10.1101/2025.01.19.633763	Expression of the p53 Network Aging-associated Genes shaken, not stirred in a 3-Week Microgravity Simulation Human Study	I hypothesise that simulated microgravity induces cellular senescence in human T cells.	I hypothesise that simulated microgravity does not induce cellular senescence in human T cells.			5	8	7	7	5	8	5	1	5	1
10.1101/2025.01.14.633073	Functionally diversified BiP orthologs control body growth, reproduction, stress resistance, aging, and ER-Phagy in Caenorhabditis elegans.	I hypothesise that HSP-3 overexpression in C. elegans increases lifespan by enhancing ER proteostasis.	I hypothesise that HSP-3 overexpression in C. elegans does not increase lifespan by enhancing ER proteostasis.			5	8	1	9	8	8	3	7	8	1
10.1101/2025.01.14.632900	Distinct causes of three phenotypic hallmarks of hematopoietic aging	I hypothesise that HSC-autonomous NF{kappa}B activity directly impairs hematopoietic stem cell function, reducing bone marrow reconstitution.	I hypothesise that HSC-autonomous NF{kappa}B activity does not directly impair hematopoietic stem cell function, not reducing bone marrow reconstitution.			8	1	8	10	7	8	8	8	5	5
10.1101/2025.01.17.633523	Microglial SIRT2 deficiency aggravates cognitive decline and amyloid pathology in Alzheimer's disease	I hypothesise that microglial SIRT2 deficiency exacerbates amyloid plaque deposition in APP/PS1 mice.	I hypothesise that microglial SIRT2 deficiency does not exacerbate amyloid plaque deposition in APP/PS1 mice.			8	8	7	8	8	7	8	5	7	5
10.1101/2025.01.17.633690	Differential regulation of brain-specific molecular pathways is the reason for curcumin adult life-phase specific DAergic neuroprotection: Insights from ALSS Drosophila model of Parkinson disease	I hypothesise curcumin's DAergic neuroprotection in aging flies requires adequate dFOXO expression.	I hypothesise that curcumin's DAergic neuroprotection in aging flies does not require adequate dFOXO expression.			5	8	9	7	9	8	2	1	10	1
10.1101/2025.01.15.633301	Elevated SUN1 promotes aging-related polarity defects through mechanical coupling microtubules to the nuclear lamina	I hypothesise elevated SUN1 directly impairs cell migration by disrupting microtubule-nuclear lamina coupling.	I hypothesise that elevated SUN1 does not directly impair cell migration by disrupting microtubule-nuclear lamina coupling.			8	8	9	5	8	9	10	5	5	1
10.1101/2025.01.17.632430	Distinct Classes of Gut Bacterial Molybdenum-Dependent Enzymes Produce Urolithins	I hypothesise that inhibiting molybdenum-dependent DMSO reductase family enzymes reduces urolithin A production in the gut.	I hypothesise that inhibiting molybdenum-dependent DMSO reductase family enzymes does not reduce urolithin A production in the gut.			8	8	8	10	1	8	3	1	5	5
10.1101/2025.01.16.633271	Childhood Maltreatment and Brain Aging During Adulthood	I hypothesise that parental physical abuse between ages 4-6 years causes accelerated brain aging in adulthood.	I hypothesise that parental physical abuse between ages 4-6 years does not cause accelerated brain aging in adulthood.			5	1	8	7	9	8	8	8	5	1
10.1101/2025.05.21.655373	Chimpanzee and human ApoE isoforms differ in the stimulation of neurite differentiation consistent with structural predictions with relevance to brain development and aging	I hypothesise that chimpanzee ApoE promotes neurite outgrowth more than human ApoE isoforms.	I hypothesise that chimpanzee ApoE does not promote neurite outgrowth more than human ApoE isoforms.			1	8	9	8	7	7	7	8	1	5
10.1101/2025.05.19.654941	DJ-1 deficiency and aging: dual drivers of retinal mitochondrial dysfunction.	I hypothesise DJ-1 deficiency accelerates retinal mitochondrial dysfunction in aging mice.	I hypothesise that DJ-1 deficiency does not accelerate retinal mitochondrial dysfunction in aging mice.			8	9	8	7	7	8	7	4	5	8
10.1101/2025.05.19.654921	Perivascular space mediated the interaction between sleep, and brain functional connectivity in the healthy aging population	I hypothesise that increased basal ganglia PVS volume fraction is associated with improved right anterior medial temporal gyrus functional connectivity in healthy aging adults.	I hypothesise that increased basal ganglia PVS volume fraction is not associated with improved right anterior medial temporal gyrus functional connectivity in healthy aging adults.			5	8	8	7	8	7	7	5	7	5
10.1101/2025.05.19.654964	Age-related auditory nerve deficits propagate central gain throughout the auditory system: Associations with cortical microstructure and speech recognition	I hypothesise that reduced auditory nerve input in older adults directly causes increased central gain in the auditory cortex.	I hypothesise that reduced auditory nerve input in older adults does not directly cause increased central gain in the auditory cortex.			8	9	9	5	9	5	8	5	5	5
10.1101/2025.05.20.654583	Molecular mechanisms regulating PDE11A4 age-related liquid-liquid phase separation (LLPS) and its reversal by selective, potent and orally-available PDE11A4 small molecule inhibitors both in vitro and in vivo	I hypothesise that inhibiting PDE11A4 phosphorylation at S163 or S239 will reduce age-related PDE11A4 LLPS in hippocampal neurons.	I hypothesise that inhibiting PDE11A4 phosphorylation at S163 or S239 will not reduce age-related PDE11A4 LLPS in hippocampal neurons.			8	10	1	10	9	5	7	10	8	1
10.1101/2025.05.20.654652	Synaptic proteins that aggregate and degrade slower with aging accumulate in microglia	I hypothesise that impaired synaptic protein degradation in aging neurons directly causes their accumulation in microglia.	I hypothesise that impaired synaptic protein degradation in aging neurons does not directly cause their accumulation in microglia.			8	5	9	5	9	7	8	9	1	1
10.1101/2025.05.16.654476	THC Reverses SIV-Induced Senescence in Astrocytes: Possible Compensatory Mechanism Against HIV Associated Brain Injury?	I hypothesise THC treatment reduces SIV-induced senescence markers in astrocytes.	I hypothesise that THC treatment does not reduce SIV-induced senescence markers in astrocytes.			8	8	7	5	9	7	8	3	7	1
10.1101/2025.05.16.654421	A Neurocognitive Shift in Midlife: Linking Cognitive Flexibility and Functional-Metabolic Adaptation with the SENECA model	I hypothesise that reduced metabolic resources in midlife directly cause a shift from DMN-FPN to sensory-driven brain networks.	I hypothesise that reduced metabolic resources in midlife do not directly cause a shift from DMN-FPN to sensory-driven brain networks.			8	8	7	6	7	7	5	3	5	1
10.1101/2025.05.18.654695	Clinical, Biological and Pathological Investigation of Bovine Lymphocyte Intestinal Retention Deficit (BLIRD): a new genetic disorder affecting life expectancy and immunity in Holstein dairy cattle	I hypothesise that the ITGB7 p.G375S mutation in Holstein cattle causes reduced longevity by impairing immune homeostasis.	I hypothesise that the ITGB7 p.G375S mutation in Holstein cattle does not cause reduced longevity and does not impair immune homeostasis.			8	5	8	9	9	7	7	5	5	8
10.1101/2025.05.19.654222	Differential expression of spatiotemporal sleep spindle clusters in ageing	I hypothesise that a reduced proportion of N2 bilateral sleep spindles in older adults is directly associated with poorer memory performance.	I hypothesise that a reduced proportion of N2 bilateral sleep spindles in older adults is not directly associated with poorer memory performance.			10	5	9	8	8	8	9	5	5	5
10.1101/2025.05.15.654267	CRITICAL ROLE OF ADULT-BORN DENTATE GRANULE NEURONS IN PATTERN COMPLETION	I hypothesise that inhibiting adult-born dentate granule neurons will impair pattern completion in aged mice.	I hypothesise that inhibiting adult-born dentate granule neurons will not impair pattern completion in aged mice.			8	8	9	8	9	7	7	5	5	8
10.1101/2025.05.16.654406	Multimodal data analysis reveals asynchronous aging dynamics across female reproductive organs	I hypothesise the myometrium exhibits increased extracellular matrix remodeling and immune activation compared to other uterine tissues with age.	I hypothesise that the myometrium does not exhibit increased extracellular matrix remodeling and immune activation compared to other uterine tissues with age.			8	7	8	7	8	8	8	8	5	1
10.1101/2025.05.15.654371	Distinct age- and pathology-dependent epitranscriptome and translational dysfunction in a tauopathy mouse model	I hypothesise that increased expression of mitochondrial tRNAs in aging and tauopathy brains directly causes increased translation of mitochondrial proteins.	I hypothesise that increased expression of mitochondrial tRNAs in aging and tauopathy brains does not directly cause increased translation of mitochondrial proteins.			8	8	9	8	7	8	5	1	5	5
10.1101/2025.05.15.654293	Oncogenic lncRNA transgene transcription modulates epigenetic memory at a naive chromosomal locus.	I hypothesise that suppressing PCAT2 lncRNA transcription prevents ectopic CENP-A localization at naive chromosomal loci.	I hypothesise that suppressing PCAT2 lncRNA transcription does not prevent ectopic CENP-A localization at naive chromosomal loci.			5	8	8	7	8	7	5	5	1	5
10.1101/2025.05.22.655517	Age-associated Tissue Organisation Shifts Retinal Pigment Epithelium Actomyosin Plasticity in Phagocytosis	I hypothesise that inhibiting ARP2/3 or formins in aged retinal pigment epithelium restores photoreceptor outer segment phagocytosis.	I hypothesise that inhibiting ARP2/3 or formins in aged retinal pigment epithelium does not restore photoreceptor outer segment phagocytosis.			8	8	7	7	7	7	5	7	7	1
10.1101/2025.05.21.655407	New glucose-abstaining Chlorella algae doubles mammalian cell culture longevity, boosts performance and drops serum needs enabling scaled applications.	I hypothesise that Chlorella BDH-1 co-culture extends mammalian cell culture longevity by reducing waste products.	I hypothesise that Chlorella BDH-1 co-culture does not extend mammalian cell culture longevity by reducing waste products.			5	8	8	7	7	9	8	5	5	1
10.1101/2025.05.22.655638	Cellular profiling identifies an early profibrotic alveolar type 2 cell signature in lung fibrosis	I hypothesise that inhibiting p53 in aged AT2 cells will reduce pro-fibrotic gene expression.	I hypothesise that inhibiting p53 in aged AT2 cells will not reduce pro-fibrotic gene expression.			5	8	7	7	8	8	8	5	5	1
10.1101/2025.05.22.655641	Senotherapeutic potential against xeroderma pigmentosum	I hypothesise that JAK inhibitors reduce UV-induced cellular senescence in XP melanocytes.	I hypothesise that JAK inhibitors do not reduce UV-induced cellular senescence in XP melanocytes.			5	5	8	10	9	9	8	5	10	1
10.1101/2025.05.19.654834	Bisdemethoxycurcumin mitigates Alzheimer disease pathology through autophagy-mediated reduction of senescence and amyloid beta	I hypothesise that Bisdemethoxycurcumin (BDMC) treatment reduces amyloid beta load in the hippocampus of 3xTg-AD mice by increasing autophagy.	I hypothesise that Bisdemethoxycurcumin (BDMC) treatment does not reduce amyloid beta load in the hippocampus of 3xTg-AD mice by decreasing autophagy.			8	8	10	7	8	8	8	9	5	1
10.1101/2025.05.17.654671	Unveiling the Biochemical Mechanisms of Aging and the Implications of Oxidative Stress on Cellular Senescence through Multi-Omics Analysis of Fibroblasts	I hypothesise that increased glycolysis in aging fibroblasts directly causes increased DNA methylation.	I hypothesise that increased glycolysis in aging fibroblasts does not directly cause increased DNA methylation.			8	9	8	8	7	7	7	2	5	1
10.1101/2025.05.18.654697	Storage Protein-Mediated Translation Control Links Juvenile Diet to Longevity in Drosophila	I hypothesise that reducing larval Lsp2 levels in Drosophila extends adult lifespan by decreasing ribosomal protein synthesis.	I hypothesise that reducing larval Lsp2 levels in Drosophila does not extend adult lifespan by decreasing ribosomal protein synthesis.			8	8	9	8	8	8	7	5	7	1
10.1101/2025.05.21.652954	Lysosomes Signal through Epigenome to Regulate Longevity across Generations	I hypothesise that inhibiting lysosomal mTOR signaling in C. elegans will extend lifespan across multiple generations.	I hypothesise that inhibiting lysosomal mTOR signaling in C. elegans will not extend lifespan across multiple generations.			8	8	8	7	7	7	7	5	8	1
10.1101/2025.05.21.654933	Structural basis for L-isoaspartyl-containing protein recognition by the PCMTD1 cullin-RING E3 ubiquitin ligase	I hypothesise PCMTD1 ubiquitylation of L-isoaspartyl proteins reduces cellular senescence.	I hypothesise that PCMTD1 ubiquitylation of L-isoaspartyl proteins does not reduce cellular senescence.			8	8	9	6	7	5	5	1	5	1
10.1101/2025.05.19.654904	Brain Multi-Omic Subtypes of Neuroticism Reveal Molecular Signatures linked to Alzheimer's Disease	I hypothesise that specific transcriptomic alterations in the DLPFC are the primary drivers of the association between neuroticism subtype N1 and Alzheimer's disease pathology.	I hypothesise that specific transcriptomic alterations in the DLPFC are not the primary drivers of the association between neuroticism subtype N1 and Alzheimer's disease pathology.			8	8	5	7	9	10	8	1	5	5
10.1101/2025.05.25.656048	Improving Cellular Senescence Detection with Weak Gene Markers in Single-Cell RNA-seq vi Iterative Imputation	I hypothesise that ICE improves cellular senescence detection accuracy in aged tissues compared to existing gene set scoring methods.	I hypothesise that ICE does not improve cellular senescence detection accuracy in aged tissues compared to existing gene set scoring methods.			5	5	8	10	8	7	9	7	8	5
10.1101/2025.05.28.656437	Inhibition of peroxisomal protein PRX-11 promotes longevity in Caenorhabditis elegans via enhancements to mitochondria	I hypothesise that inhibiting PRX-11 extends C. elegans lifespan by maintaining mitochondrial tubulation in aged animals.	I hypothesise that inhibiting PRX-11 does not extend C. elegans lifespan by maintaining mitochondrial tubulation in aged animals.			8	1	9	5	9	8	8	5	5	1
10.1101/2025.05.25.655566	Mechanism of age-related accumulation of mitochondrial DNA mutations in human blood	I hypothesise that increased clonal hematopoiesis directly drives the accumulation of detectable mitochondrial DNA mutations in aging human blood.	I hypothesise that increased clonal hematopoiesis does not directly drive the accumulation of detectable mitochondrial DNA mutations in aging human blood.			9	9	9	7	7	9	1	7	5	1
10.1101/2025.05.24.655902	Adaptive-like NK cell responses to influenza correlate with humoral immunity and are influenced by age and sex	I hypothesise that increased frequency of TNFSF10+LGALS9+ NK cells enhances influenza protection in younger females.	I hypothesise that increased frequency of TNFSF10+LGALS9+ NK cells does not enhance influenza protection in younger females.			8	8	5	7	7	9	3	5	8	5
10.1101/2025.05.23.655144	EBSn, a robust synthetic reporter for monitoring ethylene responses in plants	I hypothesise EBSn reporter expression in tomato fruit senescence is directly proportional to endogenous ethylene levels.	I hypothesise that EBSn reporter expression in tomato fruit senescence is not directly proportional to endogenous ethylene levels.			5	8	9	8	9	7	9	5	8	5
10.1101/2025.05.23.655694	Telomeric antisense oligonucleotides reduce premature aging phenotypes in telomerase mutant zebrafish	I hypothesise that telomeric antisense oligonucleotides will reduce cellular senescence markers in aging zebrafish.	I hypothesise that telomeric antisense oligonucleotides will not reduce cellular senescence markers in aging zebrafish.			7	8	10	6	8	7	8	5	7	1
10.1101/2025.05.23.655872	12 weeks of voluntary wheel running restores glucagon sensitivity in middle-aged mice	I hypothesise that 12 weeks of voluntary wheel running restores glucagon sensitivity in middle-aged mice by increasing hepatic glycogen content.	I hypothesise that 12 weeks of voluntary wheel running does not restore glucagon sensitivity in middle-aged mice by decreasing hepatic glycogen content.			8	1	8	7	8	8	8	8	8	5
10.1101/2025.05.22.655574	MACHINE LEARNING FOR MISSING DATA IMPUTATION IN ALZHEIMER'S RESEARCH: PREDICTING MEDIAL TEMPORAL LOBE FLEXIBILITY	I hypothesise that higher P-tau217 levels predict lower medial temporal lobe network flexibility in aging individuals.	I hypothesise that higher P-tau217 levels do not predict lower medial temporal lobe network flexibility in aging individuals.			8	5	8	7	8	7	8	1	5	5
10.1101/2025.05.22.655620	Differential age effects on functional network development link to contextual memory disruption in APOE4 versus APOE3 homozygous mice	I hypothesise that APOE4 adult mice exhibit reduced functional network complexity compared to APOE3 adult mice.	I hypothesise that APOE4 adult mice do not exhibit reduced functional network complexity compared to APOE3 adult mice.			5	5	8	7	7	8	8	7	7	8
10.1101/2025.05.22.655368	Effect of Age on Xenobiotic-Induced Autoimmunity	I hypothesise that mercury-induced autoimmunity incidence decreases with increasing mouse age due to immunosenescence.	I hypothesise that mercury-induced autoimmunity incidence does not decrease with increasing mouse age due to immunosenescence.			8	8	8	7	8	8	7	2	5	1
10.1101/2025.05.23.655816	Node persistence from topological data analysis reveals changes in brain functional connectivity	I hypothesise that increased node persistence in specific brain regions correlates with cognitive decline in healthy aging.	I hypothesise that increased node persistence in specific brain regions does not correlate with cognitive decline in healthy aging.			7	8	8	8	7	8	7	7	5	5
10.1101/2025.05.22.655469	Age and Alzheimer's disease affect functional connectivity along separate axes of functional brain organization	I hypothesise that early AD pathology accumulation specifically alters functional connectivity along the sensory-association axis.	I hypothesise that early AD pathology accumulation does not specifically alter functional connectivity along the sensory-association axis.			8	7	8	5	7	8	9	5	5	5
10.1101/2025.05.20.654782	Genome assembly and annotation of the naked mole rat Heterocephalus glaber reared in Japan	I hypothesise that specific intraspecific genomic variations in naked mole rats contribute to their exceptional longevity.	I hypothesise that specific intraspecific genomic variations in naked mole rats do not contribute to their exceptional longevity.			5	8	9	7	8	1	8	9	5	5
10.1101/2025.05.21.655400	Beta-Hydroxybutyrate but not NMN supplementation mimics caloric restriction reducing early mortality in Daphnia	I hypothesise beta-hydroxybutyrate supplementation reduces early mortality in Daphnia by mimicking caloric restriction.	I hypothesise that beta-hydroxybutyrate supplementation does not reduce early mortality in Daphnia by mimicking caloric restriction.			5	8	8	8	7	7	7	1	5	5
10.1101/2025.05.20.653758	Genetic background influences the heterogeneous phenotypes driven by the MAFAS64F MODY variant in male mice	I hypothesise that reducing MafAS64F abundance in male MafAS64F/+ mice on a mixed background will prevent diabetes.	I hypothesise that reducing MafAS64F abundance in male MafAS64F/+ mice on a mixed background will not prevent diabetes.			1	8	7	7	9	7	8	5	5	5
10.1101/2025.05.29.656780	Single-cell Characterization of DNA Hydroxymethylation of the Mouse Brain During Aging	I hypothesise that increased 5hmCG accumulation in open chromatin loci during aging correlates with upregulated cell-type-specific genes in mouse cortical neurons.	I hypothesise that increased 5hmCG accumulation in open chromatin loci during aging does not correlate with upregulated cell-type-specific genes in mouse cortical neurons.			8	8	8	8	7	8	5	5	5	1
10.1101/2025.05.30.655790	The clinical drug candidate anle138b binds predominantly to the central cavity in lipidic AÃƒÆ’Ã…Â½Ãƒâ€šÃ‚Â² fibrils and modulates fibril formation.	I hypothesise anle138b binding to the central cavity of AÃƒÆ’Ã…Â½Ãƒâ€šÃ‚Â² fibrils inhibits fibril elongation.	I hypothesise that anle138b binding to the central cavity of AÃƒÆ’Ã…Â½Ãƒâ€šÃ‚Â² fibrils does not inhibit fibril elongation.			1	1	8	1	9	7	9	5	8	5
10.1101/2025.05.30.657015	Functional analysis of gene family evolution demonstrates expansion of digestive, immunity and olfactory functions in the black soldier fly (Hermetia illucens) lineage	I hypothesise that increased gene duplications in the proteolysis gene family are associated with increased longevity in Asilidae species.	I hypothesise that increased gene duplications in the proteolysis gene family are not associated with increased longevity in Asilidae species.			8	8	7	7	7	8	8	5	5	5
10.1101/2025.05.30.656844	Cell-type-specific patterns and consequences of somatic mutation in development and aging brain	I hypothesise that increased somatic mutation rates in aged glial cells correlate with altered gene expression profiles.	I hypothesise that increased somatic mutation rates in aged glial cells do not correlate with altered gene expression profiles.			7	8	9	9	7	9	8	7	5	5
10.1101/2025.05.27.656381	Hormetic elevation of taurine restrains inflammaging by deactivating the NLRP3 inflammasome.	I hypothesise that increasing taurine levels in aged mice will reduce NLRP3 inflammasome activation.	I hypothesise that increasing taurine levels in aged mice will not reduce NLRP3 inflammasome activation.			8	5	8	7	5	5	8	5	8	1
10.1101/2025.05.30.656434	FUNCTIONAL ANALYSIS OF BIPARTITE NRF2 ACTIVATORS THAT OVERCOME FEEDBACK REGULATION FOR AGE-RELATED CHRONIC DISEASES	I hypothesise that inhibiting Bach1 will enhance the longevity benefits of Nrf2 activation in aging cells.	I hypothesise that inhibiting Bach1 will not enhance the longevity benefits of Nrf2 activation in aging cells.			8	8	8	7	7	8	8	9	7	1
10.1101/2025.05.27.656475	An Adipose mTORC1 Effector Links Nutrient-induced Ribosomal Protein Translation to Lifespan in Drosophila	I hypothesise that Lsp2 ablation in Drosophila adipocytes extends lifespan by reducing global ribosomal protein mRNA translation.	I hypothesise that Lsp2 ablation in Drosophila adipocytes does not extend lifespan by reducing global ribosomal protein mRNA translation.			8	9	8	9	7	8	3	3	5	5
10.1101/2025.05.29.656850	Neural Onset and Offset Responses in Core and Belt Auditory Cortex of Young and Aged Alert Macaque Monkeys	I hypothesise that aged macaque monkeys will exhibit reduced onset/offset response synchrony in auditory belt area CL compared to core areas.	I hypothesise that aged macaque monkeys will not exhibit reduced onset/offset response synchrony in auditory belt area CL compared to core areas.			1	5	8	7	8	9	8	8	5	1
10.1101/2025.05.26.655855	Your Brain Doesn't Look a Day Past 70! Cross-Sectional Associations with Brain-Predicted Age in the Cognitively-Intact Oldest-Old	I hypothesise that in cognitively-intact oldest-old, sex is associated with brain-predicted age difference.	I hypothesise that in cognitively-intact oldest-old, sex is not associated with brain-predicted age difference.			1	8	8	8	7	7	8	8	5	5
10.1101/2025.05.28.656619	Predictable modulation of a spontaneous post-translational modification in living cells	I hypothesise that dialAGE-mediated modulation of ubiquitin glycation in living cells will alter cellular senescence.	I hypothesise that dialAGE-mediated modulation of ubiquitin glycation in living cells will not alter cellular senescence.			5	8	10	7	7	10	8	5	5	1
10.1101/2025.05.27.656398	ECgo: All-Optical Induction of Single Endothelial Cell Injury and Capillary Occlusion in the Brain	I hypothesise that ECgo-induced single EC injury accelerates brain aging markers in mice.	I hypothesise that ECgo-induced single EC injury does not accelerate brain aging markers in mice.			1	5	9	7	7	8	5	5	5	8
10.1101/2025.05.26.656217	Integrin-binding matricellular protein fibulin-5 maintains epidermal stem cell heterogeneity during skin aging	I hypothesise that Fbln5 deficiency in mice accelerates skin aging phenotypes by impairing epidermal stem cell heterogeneity.	I hypothesise that Fbln5 deficiency in mice does not accelerate skin aging phenotypes by impairing epidermal stem cell heterogeneity.			8	5	7	7	8	7	8	5	5	8
10.1101/2025.05.29.656811	Impacts of stress and aging on spore health in Schizosaccharomyces pombe	I hypothesise that heat stress accelerates the decline in S. pombe spore longevity.	I hypothesise that heat stress does not accelerate the decline in S. pombe spore longevity.			5	8	8	7	9	8	9	1	5	1
10.1101/2025.05.27.656284	Tirzepatide reduces diet-induced senescence and NETosis-mediated liver fibrosis in mice	I hypothesise that reducing hepatic lipofuscin accumulation prevents diet-induced liver fibrosis in mice.	I hypothesise that reducing hepatic lipofuscin accumulation does not prevent diet-induced liver fibrosis in mice.			5	8	1	7	8	8	8	5	1	5
10.1101/2025.05.26.656117	Methyl Nicotinate Is a Novel Geroprotective Compound That Promotes Mitochondria Dependent Lifespan Extension	I hypothesise methyl nicotinate extends lifespan in yeast by activating AMPK/SNF1 signaling.	I hypothesise that methyl nicotinate does not extend lifespan in yeast by activating AMPK/SNF1 signaling.			8	8	7	8	8	7	8	1	8	1
10.1101/2025.06.05.657842	TRPV4 Channels Mediate Bladder Cancer Cell Proliferation, Migration and Chemoresistance	I hypothesise that inhibiting TRPV4 channels will reduce bladder cancer cell proliferation in aging individuals.	I hypothesise that inhibiting TRPV4 channels will not reduce bladder cancer cell proliferation in aging individuals.			8	8	8	7	8	7	9	5	5	1
10.1101/2025.06.03.657357	Non-invasive measures of DNA methylation capture molecular aging in wild capuchin monkeys	I hypothesise that non-invasive fecal DNA methylation accurately predicts chronological age in wild capuchin monkeys.	I hypothesise that non-invasive fecal DNA methylation does not accurately predict chronological age in wild capuchin monkeys.			5	9	8	5	10	9	7	5	8	5
10.1101/2025.06.03.656903	The longevity effects of reduced IGF-1 signaling depend on the stability of the mitochondrial genome	I hypothesise that reduced IGF-1 signaling extends lifespan only in organisms with an intact mitochondrial genome.	I hypothesise that reduced IGF-1 signaling does not extend lifespan in organisms with an intact mitochondrial genome.			8	8	7	7	9	7	8	5	1	1
10.1101/2025.06.04.653670	Early neuronal reprogramming and cell cycle reentry shape Alzheimer's disease progression	I hypothesise that early neuronal cell cycle reentry in Alzheimer's disease is associated with increased resistance to oxidative stress.	I hypothesise that early neuronal cell cycle reentry in Alzheimer's disease is not associated with increased resistance to oxidative stress.			8	8	7	7	7	7	9	5	8	5
10.1101/2025.06.05.658069	Antigen-specific Th17 T cells offset the age-related decline in durable T cell immunity	I hypothesise that VZV-specific Th17 CD4+ T cells in older adults vaccinated with the adjuvanted VZV vaccine exhibit enhanced lipid metabolism compared to unvaccinated older adults.	I hypothesise that VZV-specific Th17 CD4+ T cells in older adults vaccinated with the adjuvanted VZV vaccine do not exhibit enhanced lipid metabolism compared to unvaccinated older adults.			8	8	9	7	8	7	8	5	5	5
10.1101/2025.06.03.657581	Telomere-driven senescence accelerates tau pathology, neuroinflammation and neurodegeneration in a tauopathy mouse model	I hypothesise that reducing telomere attrition in tauopathy mice will decrease tau phosphorylation and aggregation.	I hypothesise that reducing telomere attrition in tauopathy mice will not decrease tau phosphorylation and aggregation.			5	8	8	5	8	8	8	5	8	5
10.1101/2025.06.05.657370	A single factor for safer cellular rejuvenation	I hypothesise SB000 treatment reverses epigenetic age markers in human fibroblasts.	I hypothesise that SB000 treatment does not reverse epigenetic age markers in human fibroblasts.			7	8	5	5	9	7	1	1	5	1
10.1101/2025.06.02.657509	Extracellular Vesicles from Multiple Sclerosis White Matter Exhibit Synaptic, Mitochondrial, Complement, and Aging-related Pathway Dysregulation	I hypothesise that MS white matter EVs downregulate synaptic protein expression in recipient neurons.	I hypothesise that MS white matter EVs do not downregulate synaptic protein expression in recipient neurons.			8	5	8	10	7	5	7	5	5	1
10.1101/2025.06.05.658176	Regulators of Interferon-Responsive Microglia Uncovered by Genome-wide CRISPRi Screening	I hypothesise that inhibiting CNOT10 expression reduces interferon-responsive microglia state induction in aging brains.	I hypothesise that inhibiting CNOT10 expression does not reduce interferon-responsive microglia state induction in aging brains.			7	8	8	10	8	7	7	3	5	1
10.1101/2025.06.02.657200	Senescent mast cells contribute to the progression of benign prostatic hyperplasia via SCF/c-KIT mediated endothelial-mesenchymal transition	I hypothesise that inhibiting mast cell activation will reduce EndMT and prostate enlargement in BPH.	I hypothesise that inhibiting mast cell activation will not reduce EndMT and prostate enlargement in BPH.			8	9	8	1	8	8	7	10	5	1
10.1101/2025.06.02.657442	Increased Genetic Protection Against Alzheimer's Disease in Centenarians	I hypothesise that a higher AD PPS is causally associated with increased longevity.	I hypothesise that a higher AD PPS is not causally associated with increased longevity.			8	8	7	7	8	9	5	1	5	5
10.1101/2025.06.02.657411	The effect of aging on post-translational modifications of wild-type human SOD1 and the A5V ALS mutant	I hypothesise that aging increases oxidized tryptophan 33 levels in wild-type human SOD1.	I hypothesise that aging does not increase oxidized tryptophan 33 levels in wild-type human SOD1.			8	8	8	7	8	8	8	5	5	1
10.1101/2025.05.28.656623	Soil to human health continuum: Exploring ergothioneine and mycorrhizal fungi in shaping the wheat microbiome	I hypothesise that ergothioneine supplementation in wheat soil increases wheat ergothioneine content.	I hypothesise that ergothioneine supplementation in wheat soil does not increase wheat ergothioneine content.			8	8	9	1	8	7	8	7	8	1
10.1101/2025.05.30.657043	Effect of Chronic Stress on Whole Blood Transcriptome: A Meta-Analysis of Publicly Available Datasets from Rodent Models	I hypothesise chronic stress downregulates B cell gene expression in mouse whole blood.	I hypothesise that chronic stress does not downregulate B cell gene expression in mouse whole blood.			5	5	9	7	9	7	8	1	5	1
10.1101/2025.05.29.656847	Developmentally-specific physiological and metabolic responses support drought resilience in switchgrass and constrains biofuel yield	I hypothesise that vegetative-stage drought in switchgrass increases saponin accumulation, inhibiting biofuel fermentation.	I hypothesise that vegetative-stage drought in switchgrass does not increase saponin accumulation, promoting biofuel fermentation.			10	1	7	8	7	7	10	5	5	5
10.1101/2025.06.10.658522	Complex I Governs Iron Levels in Bat Mitochondria to Couple Respiration with Lipid Metabolism	I hypothesise that inhibiting Complex I in bat mitochondria increases mitochondrial iron, leading to ROS production and lipid droplet accumulation.	I hypothesise that inhibiting Complex I in bat mitochondria does not increase mitochondrial iron, leading to no ROS production and no lipid droplet accumulation.			8	8	1	7	9	7	8	8	5	1
10.1101/2025.06.09.658559	TrAEL-seq captures DNA replication dynamics in mammalian cells	I hypothesise that oncogene-induced senescence is associated with reduced DNA replication fork speed in mammalian cells.	I hypothesise that oncogene-induced senescence is not associated with reduced DNA replication fork speed in mammalian cells.			8	8	8	7	8	7	5	5	8	1
10.1101/2025.06.09.658696	Characterization of Somatic Mutations in Human tRNA Genes Reveals Tumor-Specific Mutational Loads, and the Generation of tRNA Variants that Alter the Genetic Code	I hypothesise that increased tRNA somatic mutation load in aging tissues directly correlates with reduced proteostasis.	I hypothesise that increased tRNA somatic mutation load in aging tissues does not directly correlate with reduced proteostasis.			8	8	7	7	7	7	8	3	5	5
10.1101/2025.06.09.658557	Loss of nephronophthisis-associated nephrocystin-1 impairs DNA damage repair in kidney organoids	I hypothesise that loss of nephrocystin-1 directly impairs DNA repair protein recruitment to DNA damage sites.	I hypothesise that loss of nephrocystin-1 does not directly impair DNA repair protein recruitment to DNA damage sites.			8	8	9	7	8	8	9	2	5	5
10.1101/2025.06.03.657636	De novo genome assembly of Ansell's mole-rat (Fukomys anselli)	I hypothesise that specific gene duplications in Fukomys anselli are associated with its extreme longevity.	I hypothesise that specific gene duplications in Fukomys anselli are not associated with its extreme longevity.			5	8	9	7	8	5	5	5	5	5
10.1101/2025.06.05.658105	Ambient Pollution Components and Sources Associated with Hippocampal Architecture and Memory in Pre-Adolescents	I hypothesise that higher childhood exposure to organic carbon and ozone is associated with reduced hippocampal diffusion in pre-adolescents.	I hypothesise that higher childhood exposure to organic carbon and ozone is not associated with reduced hippocampal diffusion in pre-adolescents.			8	8	8	5	9	7	8	5	5	5
10.1101/2025.06.04.657914	Calorie restriction suppresses aging alpha cell pro-inflammatory signaling	I hypothesise that calorie restriction in aged mice reduces alpha cell MHC-I expression, leading to decreased CD8+ T cell infiltration in islets.	I hypothesise that calorie restriction in aged mice does not reduce alpha cell MHC-I expression, leading to increased CD8+ T cell infiltration in islets.			5	8	9	9	8	9	8	1	5	5
10.1101/2025.06.08.658533	Diminished and altered cellular senescence response in delayed wound healing of aging	I hypothesise that aged mice exhibit a reduced number of senescent fibroblasts in wound tissue compared to young mice.	I hypothesise that aged mice do not exhibit a reduced number of senescent fibroblasts in wound tissue compared to young mice.			5	8	8	7	7	7	8	9	1	1
10.1101/2025.06.05.658166	Phytoene synthase modulates seed longevity via the action of ÃƒÆ’Ã…Â½Ãƒâ€šÃ‚Â²-carotene derived metabolites	I hypothesise that increased ÃƒÆ’Ã…Â½Ãƒâ€šÃ‚Â²-carotene derived apocarotenoids directly reduce reactive oxygen species in seeds, thereby extending seed longevity.	I hypothesise that increased ÃŽÂ²-carotene derived apocarotenoids do not directly reduce reactive oxygen species in seeds, thereby not extending seed longevity.			8	8	8	7	8	7	7	5	5	5
10.1101/2025.06.05.658133	Cell-specific RNA isoform remodeling in the aging mouse brain	I hypothesise that aging-associated changes in transcription start sites in mouse brain immune cells lead to altered protein isoforms.	I hypothesise that aging-associated changes in transcription start sites in mouse brain immune cells do not lead to altered protein isoforms.			5	8	9	5	9	8	8	5	5	1
10.1101/2025.06.05.658186	Visual blur disrupts the kinematic and temporal aspects of reach-grasp-lift movements.	I hypothesise that increased visual blur will significantly increase the dwell time during reach-grasp-lift movements in older adults.	I hypothesise that increased visual blur will not significantly increase the dwell time during reach-grasp-lift movements in older adults.			5	8	8	7	5	7	8	7	5	5
10.1101/2025.06.04.657876	Neurotrophic Factor-ÃƒÆ’Ã…Â½Ãƒâ€šÃ‚Â±1/carboxypeptidase E regulates critical protein networks to rescue neurodegeneration, defective synaptogenesis and impaired autophagy in Alzheimer's Disease mice	I hypothesise that NF-1/CPE gene therapy upregulates synaptic organization proteins PSD95 and Synapsin1 in Alzheimer's disease mice.	I hypothesise that NF-1/CPE gene therapy does not upregulate synaptic organization proteins PSD95 and Synapsin1 in Alzheimer's disease mice.			5	8	8	5	7	9	5	10	8	1
10.1101/2025.06.04.657879	Glycated alpha-synuclein assemblies cause distinct Parkinsons disease pathogenesis in mice	I hypothesise glycated alpha-synuclein assemblies induce greater RAGE accumulation in mouse substantia nigra than non-glycated assemblies.	I hypothesise that glycated alpha-synuclein assemblies do not induce greater RAGE accumulation in mouse substantia nigra than non-glycated assemblies.			8	8	7	7	8	7	1	9	7	5
10.1101/2025.06.04.657901	A human ex vivo model of radiation-induced skin injury reveals p53-driven DNA damage signaling and recapitulates a TGFÃƒÆ’Ã…Â½Ãƒâ€šÃ‚Â² fibrotic response	I hypothesise that inhibiting MDM2 will reduce radiation-induced skin fibrosis in the ex vivo model.	I hypothesise that inhibiting MDM2 will not reduce radiation-induced skin fibrosis in the ex vivo model.			9	8	9	5	7	9	8	5	8	1
10.1101/2025.06.03.657746	Impairment in axonal translation and cytoplasmic viscosity during aging in sensory neurons	I hypothesise that increasing axonal ATP synthesis in aged sensory neurons will restore axonal translation levels.	I hypothesise that increasing axonal ATP synthesis in aged sensory neurons will not restore axonal translation levels.			8	8	9	7	8	7	8	5	8	5
10.1101/2025.06.11.659035	Activin receptor type IIA/B blockade increases muscle mass and strength, but compromises glycemic control in mice	I hypothesise that ActRIIA/IIB blockade in mice impairs hepatic glucose output, leading to glucose intolerance.	I hypothesise that ActRIIA/IIB blockade in mice does not impair hepatic glucose output, leading to glucose tolerance.			8	10	8	7	7	8	8	9	5	8
10.1101/2025.06.10.658747	Canagliflozin reprograms the aging hippocampus in genetically diverse UM-HET3 mice and attenuates Alzheimer's-like pathology	I hypothesise canagliflozin improves hippocampal mitochondrial function in male UM-HET3 mice.	I hypothesise that canagliflozin does not improve hippocampal mitochondrial function in male UM-HET3 mice.			8	8	7	5	7	8	8	7	5	5
10.1101/2025.06.10.658632	Proximal Pulmonary Artery Stiffening as a Biomarker of Cardiopulmonary Aging	I hypothesise that increased proximal pulmonary artery stiffness in aged mice is caused by collagen reorientation.	I hypothesise that increased proximal pulmonary artery stiffness in aged mice is not caused by collagen reorientation.			7	8	9	10	8	9	8	3	8	1
10.1101/2025.06.11.659008	Viral Infection Induces Alzheimer's Disease-Related Pathways and Senescence in iPSC-Derived Neuronal Models	I hypothesise that HSV-1 infection in iPSC-derived neurons triggers cellular senescence pathways.	I hypothesise that HSV-1 infection in iPSC-derived neurons does not trigger cellular senescence pathways.			5	8	8	7	8	9	9	9	8	8
10.1101/2025.06.13.659620	Mitochondrial Dysfunction Drives Age-Related Degeneration of the Thoracic Aorta	I hypothesise that inhibiting mitochondrial dysfunction with elamipretide will reduce aortic stiffness in aged mice.	I hypothesise that inhibiting mitochondrial dysfunction with elamipretide will not reduce aortic stiffness in aged mice.			5	8	7	7	7	7	8	5	8	1
10.1101/2025.06.11.658631	Transient AMPK activation by nutrient stress of high fat diet preserves cardiac electrophysiological stability and protects against arrhythmias	I hypothesise that transient AMPK activation by a high-fat diet protects against cardiac arrhythmias by preserving mitochondrial integrity.	I hypothesise that transient AMPK activation by a high-fat diet does not protect against cardiac arrhythmias by preserving mitochondrial integrity.			8	8	9	7	7	1	7	5	8	5
10.1101/2025.06.10.658841	Accumulation of SA-ÃƒÆ’Ã…Â½Ãƒâ€šÃ‚Â²Gal High Cells in Human Naive T Cell Compartments Reveals a Stress-Adapted, Senescent-Like State	I hypothesise that impaired autophagic flux in naive T cells directly causes SA-ÃƒÆ’Ã…Â½Ãƒâ€šÃ‚Â²Gal accumulation and cytotoxic properties.	I hypothesise that impaired autophagic flux in naive T cells does not directly cause SA-ÃŽÂ²Gal accumulation and cytotoxic properties.			5	8	8	7	7	10	7	5	5	5
10.1101/2025.06.10.658799	Changes in DNA methylation after trauma processing and meditation in a large group setting of 1.6 years duration (Timeless Wisdom Training)	I hypothesise that the Timeless Wisdom Training program slows epigenetic aging in participants.	I hypothesise that the Timeless Wisdom Training program does not slow epigenetic aging in participants.			8	9	9	7	7	7	8	9	5	1
10.1101/2025.06.10.658005	fMRI-Based CSF Flow Quantification Identifies Cardiac Pulsatility as the Dominant Driver Over Respiratory and Slow Vasomotion Cycles	I hypothesise that reduced cardiac pulsatility in older adults leads to decreased CSF flow velocity.	I hypothesise that reduced cardiac pulsatility in older adults does not lead to decreased CSF flow velocity.			1	5	8	10	8	9	8	9	5	5
10.1101/2025.06.09.658686	White matter micro- and macrostructural properties in midlife individuals at risk for Alzheimer's disease: Associations with sex and menopausal status	I hypothesise that perimenopausal women will show increased white matter microstructural integrity compared to premenopausal women.	I hypothesise that perimenopausal women will not show increased white matter microstructural integrity compared to premenopausal women.			5	8	7	7	8	9	7	7	5	1
10.1101/2025.06.09.658759	Analysis of protein aging reveals rates of subcellular organelle renewal and selective post-translational modification in Arabidopsis	I hypothesise that proteins located in mitochondria and plastids exhibit slower degradation rates than proteins in the vesicular pathway.	I hypothesise that proteins located in mitochondria and plastids do not exhibit slower degradation rates than proteins in the vesicular pathway.			8	8	8	8	9	8	8	7	7	5
10.1101/2025.06.09.658659	Lrrc14b is a novel regulator of striated muscle function	I hypothesise that Lrrc14b deficiency accelerates cardiac aging phenotypes.	I hypothesise that Lrrc14b deficiency does not accelerate cardiac aging phenotypes.			10	1	8	7	7	7	1	5	5	1
10.1101/2025.06.09.658749	Anti-isoDGR Antibody Inhibits Atherosclerosis Induced by Western Diet in ApoE-/- mice	I hypothesise that isoDGR accumulation in vascular tissue directly contributes to increased atherosclerotic plaque size.	I hypothesise that isoDGR accumulation in vascular tissue does not directly contribute to increased atherosclerotic plaque size.			8	8	8	7	7	9	5	3	5	5
10.1101/2025.06.09.658743	Elevated mitochondrial superoxide promotes longevity through a mitochondria-to-nucleus kinase signaling pathway	I hypothesise that elevated mitochondrial superoxide specifically activates the SEK-3/PMK-3/MAK-2/CEBP-1 pathway to extend lifespan.	I hypothesise that elevated mitochondrial superoxide does not specifically activate the SEK-3/PMK-3/MAK-2/CEBP-1 pathway to extend lifespan.			1	9	8	7	8	7	5	10	5	1
10.1101/2025.06.10.656791	Oncogenic and tumor-suppressive forces converge on a progenitor-orchestrated niche to shape early tumorigenesis	I hypothesise that KRAS inhibition in progenitor-like cells prevents PDAC tumorigenesis by disrupting niche formation.	I hypothesise that KRAS inhibition in progenitor-like cells does not prevent PDAC tumorigenesis by not disrupting niche formation.			5	5	7	8	7	8	9	5	1	1
10.1101/2025.06.18.659864	The Mediator complex subunit Med19 extends healthy lifespan in Drosophila by preventing cellular and organismal frailty	I hypothesise that reducing Med19 expression in Drosophila cells will increase JNK pathway activity and apoptosis.	I hypothesise that reducing Med19 expression in Drosophila cells will not increase JNK pathway activity and apoptosis.			8	8	8	7	7	9	5	5	7	1
10.1101/2025.06.16.659867	NSD1 governs H3K36me2-mediated DNA methylation and drives differentiation of human iPSCs by regulating HIDEN lncRNA expression	I hypothesise that NSD1 deficiency in human iPSCs impairs endodermal differentiation by reducing HIDEN lncRNA expression.	I hypothesise that NSD1 deficiency in human iPSCs does not impair endodermal differentiation and does not reduce HIDEN lncRNA expression.			7	8	10	7	7	7	7	5	5	8
10.1101/2025.06.13.659285	Tissue-Specific Activation of Microhomology-Mediated End Joining with Age Reflects Dynamic Rewiring of DNA Repair in Rats	I hypothesise that increased MMEJ activity in aged rat testes and liver contributes to higher mutation rates in these tissues.	I hypothesise that increased MMEJ activity in aged rat testes and liver does not contribute to higher mutation rates in these tissues.			5	9	10	5	7	7	8	5	5	1
10.1101/2025.06.17.659987	Metabolic resilience rules sex-specific pain recovery during hormonal aging: a multi-omics analysis of neuropathy in mice.	I hypothesise that aging females with higher fatty acid oxidation rates exhibit faster recovery from nerve injury.	I hypothesise that aging females with higher fatty acid oxidation rates do not exhibit faster recovery from nerve injury.			8	8	5	9	8	7	10	5	7	1
10.1101/2025.06.16.659936	Lysergic Acid Diethylamide extends lifespan in Caenorhabditis elegans	I hypothesise LSD treatment in C. elegans reduces lipofuscin accumulation by inhibiting TOR signaling.	I hypothesise that LSD treatment in C. elegans does not reduce lipofuscin accumulation by inhibiting TOR signaling.			8	8	8	7	9	8	1	5	5	1
10.1101/2025.06.11.659210	KRAS withdrawal in Cholangiocarcinoma leads to immune infiltration and tumor regression	I hypothesise that KRAS withdrawal induces cellular senescence in cholangiocarcinoma cells.	I hypothesise that KRAS withdrawal does not induce cellular senescence in cholangiocarcinoma cells.			8	9	8	5	8	8	8	5	5	1
10.1101/2025.06.11.659129	Klotho deficiency promotes skeletal muscle weakness and is associated with impaired motor unit connectivity	I hypothesise that Klotho deficiency directly impairs neuromuscular junction integrity, leading to motor unit loss and muscle weakness.	I hypothesise that Klotho deficiency does not directly impair neuromuscular junction integrity, preventing motor unit loss and muscle weakness.			8	8	8	5	8	9	8	5	5	1
10.1101/2025.06.11.659151	Senescence-Associated Chromatin Rewiring Promotes Inflammation and Transposable Element Activation	I hypothesise that senescent fibroblasts exhibit increased LINE-1 retrotransposon expression compared to quiescent fibroblasts.	I hypothesise that senescent fibroblasts do not exhibit increased LINE-1 retrotransposon expression compared to quiescent fibroblasts.			7	1	9	7	8	9	10	9	5	1
10.1101/2025.06.16.659991	Sustained Lysosomal Delivery of Enhanced Cy3-Labeled Acid Nanoparticles Restores Lysosomal pH in Retinal Pigment Epithelial Cells and Astrocytes	I hypothesise that sustained lysosomal delivery of Cy3-PLGA nanoparticles restores lysosomal pH in aged RPE cells.	I hypothesise that sustained lysosomal delivery of Cy3-PLGA nanoparticles does not restore lysosomal pH in aged RPE cells.			8	8	8	7	7	8	7	5	8	5
10.1101/2025.06.13.658151	Non-autonomy of age-related morphological changes in the C. elegans germline stem cell niche	I hypothesise that DAF-16 in body wall muscle is necessary for maintaining distal tip cell process length in aged C. elegans.	I hypothesise that DAF-16 in body wall muscle is not necessary for maintaining distal tip cell process length in aged C. elegans.			5	5	5	7	7	8	5	5	5	5
10.1101/2025.06.11.659162	Effects of aging on upper body express visuomotor responses while reaching under varying postural demands	I hypothesise elderly individuals exhibit reduced express visuomotor response frequency compared to younger individuals.	I hypothesise that elderly individuals do not exhibit reduced express visuomotor response frequency compared to younger individuals.			1	5	9	7	8	7	5	2	5	1
10.1101/2025.06.10.658920	Systematic characterization of the ovarian landscape across mouse menopause models	I hypothesise that VCD-induced ovarian follicle depletion causes distinct immune alterations compared to intact aging in mice.	I hypothesise that VCD-induced ovarian follicle depletion does not cause distinct immune alterations compared to intact aging in mice.			5	7	8	8	8	7	8	7	8	5
10.1101/2025.01.10.632377	The Neurocognitive efficiency score: Derivation, validation, and application of a novel combination of concurrent electrophysiological and behavioral data	I hypothesise that older adults will exhibit a lower Neurocognitive Efficiency Score (NES) compared to younger adults.	I hypothesise that older adults will not exhibit a lower Neurocognitive Efficiency Score (NES) compared to younger adults.			10	5	8	2	7	5	8	7	8	5
10.1101/2025.06.23.660200	Transcriptional Elongation-Associated RNA Processing Errors in Induced Cellular Growth Arrest	I hypothesise that NELF or SPT6 depletion-induced growth arrest in human fibroblasts is suppressed by ELOA loss.	I hypothesise that NELF or SPT6 depletion-induced growth arrest in human fibroblasts is not suppressed by ELOA loss.			8	8	8	9	8	9	7	5	10	1
10.1101/2025.06.19.660575	Cellular and molecular landscapes of human tendons across the lifespan revealed by spatial and single-cell transcriptomics	I hypothesise that aged tendon fibroblasts exhibit reduced expression of matrix synthesis genes compared to embryonic progenitor states.	I hypothesise that aged tendon fibroblasts do not exhibit reduced expression of matrix synthesis genes compared to embryonic progenitor states.			1	1	9	10	8	5	9	5	5	1
10.1101/2025.06.20.660653	Non-cell autonomous control of presynaptic remodeling by the hypothalamic autophagy/NPY axis	I hypothesise that inhibiting hypothalamic NPY/AgRP neuron autophagy accelerates presynaptic active zone remodeling in aged mammals.	I hypothesise that inhibiting hypothalamic NPY/AgRP neuron autophagy does not accelerate presynaptic active zone remodeling in aged mammals.			5	8	8	1	7	9	5	1	5	5
10.1101/2025.06.19.660635	Downregulation of LATS1/2 Drives Endothelial Senescence-Associated Stemness (SAS) and Atherothrombotic Lesion Formation	I hypothesise that LATS1/2 downregulation in endothelial cells directly causes cellular senescence and stemness phenotypes.	I hypothesise that LATS1/2 downregulation in endothelial cells does not directly cause cellular senescence and stemness phenotypes.			9	8	7	10	8	1	5	2	5	5
10.1101/2025.06.17.660162	A Single-Cell Atlas of DNA Methylation in Autism Spectrum Disorder Reveals Distinct Regulatory and Aging Signatures	I hypothesise that age-associated DNA methylation changes in excitatory neurons are distinct in individuals with ASD compared to controls.	I hypothesise that age-associated DNA methylation changes in excitatory neurons are not distinct in individuals with ASD compared to controls.			8	8	9	8	8	7	9	5	7	5
10.1101/2025.06.16.660032	Comparative Transcriptomics Reveals Inflammatory and Epigenetic Programs that Actively Orchestrate Pineal Brain Sand Calcification	I hypothesise that up-regulation of the 103-gene calcifier module drives pineal gland calcification.	I hypothesise that up-regulation of the 103-gene calcifier module does not drive pineal gland calcification.			5	8	8	10	7	9	10	1	5	1
10.1101/2025.06.18.660159	Heme drives cardiac endothelial senescence in sepsis via STING activation	I hypothesise that inhibiting STING activation will reduce heme-induced cardiac endothelial senescence.	I hypothesise that inhibiting STING activation will not reduce heme-induced cardiac endothelial senescence.			8	8	9	5	8	7	8	5	7	1
10.1101/2025.06.15.659256	From muscle fibres to gears: How fibre rotation and shape change impact muscle function	I hypothesise that increased fibre rotation with ageing leads to reduced muscle force generation capacity.	I hypothesise that increased fibre rotation with ageing does not lead to reduced muscle force generation capacity.			1	5	9	5	8	9	7	9	5	5
10.1101/2025.06.16.659752	Characterisation of the dual roles of senescent-like T cells that arise during healthy and unhealthy ageing	I hypothesise that TGF{beta} inhibition will restore cytotoxic function in senescent-like CD8 TEMRA cells from unhealthy ageing.	I hypothesise that TGF{beta} inhibition will not restore cytotoxic function in senescent-like CD8 TEMRA cells from unhealthy ageing.			8	10	7	1	7	7	8	5	5	5
10.1101/2025.06.14.659669	"Smurf Mice": revolutionising our understanding of age-related and end-of-life animal physiology	I hypothesise that the Smurf transition marks a conserved, evolutionarily conserved, two-phase ageing process in mammals.	I hypothesise that the Smurf transition does not mark a conserved, evolutionarily conserved, two-phase ageing process in mammals.			5	8	7	7	10	9	5	1	1	1
10.1101/2025.06.20.660800	Harnessing cell-encapsulated hydrogels to study astrocyte mechanoresponse in 4D	I hypothesise that increased biomechanical strain on ONH astrocytes induces cellular senescence.	I hypothesise that increased biomechanical strain on ONH astrocytes does not induce cellular senescence.			5	8	10	7	5	8	8	1	5	1
10.1101/2025.06.21.660835	ÃƒÆ’Ã…Â½Ãƒâ€šÃ‚Â²-bursting as a sensitive neural marker of inhibitory control in healthy older adults: a linear mixed-effects modelling and threshold-free cluster approach	I hypothesise that increased parieto-occipital beta-bursting rate precedes successful response inhibition in older adults.	I hypothesise that increased parieto-occipital beta-bursting rate does not precede successful response inhibition in older adults.			5	9	7	8	8	7	8	5	7	1
10.1101/2025.06.25.661273	Smaller stepping thresholds in older adults might be related to reduced ability to suppress conflicting sensory information	I hypothesise that older adults with reduced ability to suppress conflicting visual information will exhibit smaller stepping thresholds during postural perturbations.	I hypothesise that older adults with reduced ability to suppress conflicting visual information will not exhibit smaller stepping thresholds during postural perturbations.			1	10	8	7	9	9	8	5	7	5
10.1101/2025.06.23.661212	YAP/TAZ activation in fibroblasts coordinates fibrotic remodeling, fibroinflammation, and epithelial dysfunction in pulmonary fibrosis	I hypothesise that inhibiting YAP/TAZ in lung fibroblasts reverses established pulmonary fibrosis in mice.	I hypothesise that inhibiting YAP/TAZ in lung fibroblasts does not reverse established pulmonary fibrosis in mice.			7	8	7	1	10	5	8	5	5	5
10.1101/2025.01.09.632132	The Role of Genetic Variation in Shaping Phenotypic Responses to Diet in Aging Drosophila melanogaster	I hypothesise that specific genetic variants in Drosophila melanogaster are associated with altered lifespan response to dietary restriction.	I hypothesise that specific genetic variants in Drosophila melanogaster are not associated with altered lifespan response to dietary restriction.			5	8	8	9	8	9	8	7	5	5
10.1101/2025.01.09.631996	Tissue-resident skeletal muscle macrophages promote recovery from viral pneumonia-induced sarcopenia in normal aging.	I hypothesise that restoring Mertk expression in aged skeletal muscle macrophages will improve recovery from viral pneumonia-induced sarcopenia.	I hypothesise that restoring Mertk expression in aged skeletal muscle macrophages will not improve recovery from viral pneumonia-induced sarcopenia.			8	9	8	8	7	7	2	5	7	5
10.1101/2025.01.13.632713	Chloroform release from ageing cells and Drosophila DJ-1 mutants	I hypothesise that increased chloroform release in ageing HEK-293t cells is causally linked to cellular senescence markers.	I hypothesise that increased chloroform release in ageing HEK-293t cells is not causally linked to cellular senescence markers.			8	8	8	7	9	8	8	1	5	5
10.1101/2025.01.13.632268	In vivo Quantification of White Matter Pathways in the Human Hippocampus	I hypothesise that reduced white matter integrity in hippocampal pathways is associated with cognitive decline in aging individuals.	I hypothesise that reduced white matter integrity in hippocampal pathways is not associated with cognitive decline in aging individuals.			7	8	9	10	10	1	4	5	8	1
10.1101/2025.01.09.631584	Integrated Multi-Omics Analyses of Synaptosomes Revealed Synapse-Centered Novel Targets in Alzheimer's Disease	I hypothesise that specific miRNA dysregulation in AD synaptosomes directly impairs synaptic protein function.	I hypothesise that specific miRNA dysregulation in AD synaptosomes does not directly impair synaptic protein function.			10	8	9	6	7	7	8	1	5	1
10.1101/2025.01.13.632794	Audiovisual gamma stimulation enhances hippocampal neurogenesis and neural circuit plasticity in aging mice	I hypothesise audiovisual gamma stimulation increases hippocampal neurogenesis in aging mice.	I hypothesise that audiovisual gamma stimulation does not increase hippocampal neurogenesis in aging mice.			8	8	8	7	9	9	8	1	5	1
10.1101/2025.01.08.632014	Balancing tumour proliferation and sustained cell cycle arrest through proteostasis remodelling drives immune niche compartmentalisation in breast cancer	I hypothesise that increased proteostasis remodelling in breast cancer cells promotes cellular senescence.	I hypothesise that increased proteostasis remodelling in breast cancer cells does not promote cellular senescence.			8	10	7	3	10	8	7	7	5	1
10.1101/2025.01.08.631888	A new skin supplement Purasomes XCELL: an integrative approach in regenerative aesthetics	I hypothesise Purasomes XCELL treatment will significantly increase telomere length in human fibroblasts compared to a placebo.	I hypothesise that Purasomes XCELL treatment will not significantly increase telomere length in human fibroblasts compared to a placebo.			1	8	7	7	1	9	7	5	5	1
10.1101/2025.01.12.632648	Squid primary cell culture as a model system and experimental tool	I hypothesise that squid primary cells from older individuals exhibit increased expression of senescence markers compared to younger individuals.	I hypothesise that squid primary cells from older individuals do not exhibit increased expression of senescence markers compared to younger individuals.			10	8	8	7	5	8	8	5	5	1
10.1101/2025.01.08.631937	Vascular contribution to cognitive impairment in heart failure with preserved ejection fraction: TRPV4 and KLF2 as key mediators of neurovascular dysfunction in the ZSF1 model	I hypothesise that downregulation of TRPV4 in cerebral microvessels causes neurovascular dysfunction and cognitive impairment in obese ZSF1 rats.	I hypothesise that downregulation of TRPV4 in cerebral microvessels does not cause neurovascular dysfunction and cognitive impairment in obese ZSF1 rats.			8	8	10	8	8	7	8	3	5	1
10.1101/2025.06.27.661935	Single-cell RNA sequencing identifies accumulation of Fcgr2b+ virtual memory like CD8 T cells with cytotoxic and inflammatory potential in aged mouse white adipose tissue	I hypothesise that Fcgr2b+ CD8 T cells in aged mouse white adipose tissue directly induce fibroblast inflammation via granzyme M.	I hypothesise that Fcgr2b+ CD8 T cells in aged mouse white adipose tissue do not directly induce fibroblast inflammation via granzyme M.			8	9	8	8	8	7	7	1	5	5
10.1101/2025.06.26.661856	Targeting breast cancer senescence in 3D models of bone metastasis	I hypothesise that combining Doxorubicin with senolytics reduces breast cancer bone metastasis by decreasing senescent cell burden.	I hypothesise that combining Doxorubicin with senolytics does not reduce breast cancer bone metastasis by decreasing senescent cell burden.			5	9	7	5	7	8	7	5	8	1
10.1101/2025.06.25.661551	Dietary restriction promotes neuronal resilience via ADIOL	I hypothesise that increasing ADIOL levels will reduce kynurenic acid in aging neurons.	I hypothesise that increasing ADIOL levels will not reduce kynurenic acid in aging neurons.			8	9	8	5	9	7	7	7	5	1
10.1101/2025.06.25.661123	In vivo chemical reprogramming is associated with a toxic accumulation of lipid droplets hindering rejuvenation	I hypothesise that increased lipid droplet accumulation directly impairs cellular function in aged mice treated with chemical reprogramming.	I hypothesise that increased lipid droplet accumulation does not directly impair cellular function in aged mice treated with chemical reprogramming.			5	8	7	7	7	8	8	9	5	8
10.1101/2025.06.24.661167	CMV reshapes lymphoid immunity in aging: a single-cell atlas with predictive modeling	I hypothesise that CMV infection in older adults leads to a decrease in CD56dim NK cells.	I hypothesise that CMV infection in older adults does not lead to a decrease in CD56dim NK cells.			5	8	7	8	8	7	8	7	5	8
10.1101/2025.06.25.661524	IL-7 armed binary CAR T cell strategy to augment potency against solid tumors	I hypothesise that co-expression of IL-7 and IL-7R in CAR T cells enhances their persistence against solid tumors.	I hypothesise that co-expression of IL-7 and IL-7R in CAR T cells does not enhance their persistence against solid tumors.			5	8	8	8	7	1	7	5	5	1
10.1101/2025.06.23.661121	Antibiotic-induced microbiota depletion impairs the pro-regenerative response to a biological scaffold in mice	I hypothesise that antibiotic-induced microbiota depletion impairs skeletal muscle regeneration by reducing eosinophil numbers.	I hypothesise that antibiotic-induced microbiota depletion does not impair skeletal muscle regeneration and does not reduce eosinophil numbers.			8	8	9	7	8	8	8	2	5	8
10.1101/2025.06.21.660865	Red-wine gene networks associated with exceptional longevity in humans	I hypothesise that genes associated with red wine consumption and centenarians are enriched in pathways protective against cardiovascular disease.	I hypothesise that genes associated with red wine consumption and centenarians are not enriched in pathways protective against cardiovascular disease.			8	8	7	7	8	7	8	5	7	1
10.1101/2025.06.25.661639	Quantitative proteomics and phosphoproteomics reveal glucocorticoid stimulation of TLR and Rho GTPase signaling in neutrophil-like cells	I hypothesise that glucocorticoid treatment accelerates neutrophil aging by promoting TLR signaling.	I hypothesise that glucocorticoid treatment does not accelerate neutrophil aging by promoting TLR signaling.			8	8	8	9	9	8	8	9	5	8
10.1101/2025.06.26.661693	Genetic mapping of lifespan and mitochondrial stress response in C. elegans	I hypothesise that activating the UPRmt with doxycycline extends lifespan in C. elegans by reversing an aging-related molecular signature.	I hypothesise that activating the UPRmt with doxycycline does not extend lifespan in C. elegans by failing to reverse an aging-related molecular signature.			8	8	9	7	7	7	8	5	7	5
10.1101/2025.06.20.660774	Synergistic effects of APOE ÃƒÆ’Ã‚Â_x008f_Ãƒâ€šÃ‚Âµ4 and Alzheimer's pathology on the neural correlates of episodic remembering in cognitively unimpaired older adults	I hypothesise that APOE ÃƒÆ’Ã…Â½Ãƒâ€šÃ‚Âµ4 carriers with higher CSF pTau181 will show reduced cortical reinstatement during episodic memory retrieval.	I hypothesise that APOE ÃƒÆ’Ã…Â½Ãƒâ€šÃ‚Âµ4 carriers with higher CSF pTau181 will not show reduced cortical reinstatement during episodic memory retrieval.			5	5	7	8	7	8	7	2	5	5
10.1101/2025.07.01.662566	Inhibition of NLRP3 by a CNS-penetrating indazole scaffold	I hypothesise that inhibiting NLRP3 with BAL-1516 reduces neuroinflammation in aged mice.	I hypothesise that inhibiting NLRP3 with BAL-1516 does not reduce neuroinflammation in aged mice.			5	8	8	5	8	7	8	9	8	1
10.1101/2025.06.29.662218	Transcriptomic entropy reveals tissue-specific patterns in aging and predicts cancer progression	I hypothesise that increased transcriptomic entropy in specific tissues directly drives cellular senescence during aging.	I hypothesise that increased transcriptomic entropy in specific tissues does not directly drive cellular senescence during aging.			5	8	7	7	7	8	8	1	5	5
10.1101/2025.06.30.662436	Acute cold exposure in humans shifts the circulating proteome to a cardioprotective and anti-aging profile	I hypothesise acute cold exposure reduces circulating levels of proteins associated with type 2 diabetes.	I hypothesise that acute cold exposure does not reduce circulating levels of proteins associated with type 2 diabetes.			5	9	9	9	7	7	8	8	5	8
10.1101/2025.07.01.662334	The chloride cotransporter NKCC1 regulates self-renewal of hippocampal neural stem cells via the transcription factor Sox11	I hypothesise that increasing NKCC1 expression in aged hippocampal NSCs will reduce their self-renewal and increase neurogenesis.	I hypothesise that increasing NKCC1 expression in aged hippocampal NSCs will not reduce their self-renewal and will not increase neurogenesis.			8	8	9	7	9	7	8	7	7	8
10.1101/2025.07.03.663090	Linking age changes in human cortical microcircuits to impaired brain function and EEG biomarkers	I hypothesise that a loss of inhibitory cells in human cortical microcircuits directly causes reduced spike rates in aging.	I hypothesise that a loss of inhibitory cells in human cortical microcircuits does not directly cause reduced spike rates in aging.			8	8	9	5	8	8	8	5	1	1
10.1101/2025.07.03.662890	XBP1s as a Therapeutic Target to Preserve Retinal Function During Aging and Neurodegeneration	I hypothesise that increasing XBP1s expression in aged mice will prevent age-related decline in retinal electrophysiological complexity.	I hypothesise that increasing XBP1s expression in aged mice will not prevent age-related decline in retinal electrophysiological complexity.			7	8	7	3	8	7	7	5	8	5
10.1101/2025.07.03.662520	Polarity-dependent modulation of sleep oscillations and cortical excitability in aging	I hypothesise anodal so-tDCS enhances SO-spindle coupling more than cathodal so-tDCS in older adults.	I hypothesise that anodal so-tDCS does not enhance SO-spindle coupling more than cathodal so-tDCS in older adults.			5	8	7	7	7	7	8	5	7	5
10.1101/2025.07.01.662660	Proteome Dynamics Across the Blastogenic Cycle of Botryllus schlosseri Reveals Targets for Cell Immortalization	I hypothesise that inhibiting CDK1 or CDK2 in Botryllus schlosseri zooids will prevent their degeneration and promote continued proliferation.	I hypothesise that inhibiting CDK1 or CDK2 in Botryllus schlosseri zooids will not prevent their degeneration and will not promote continued proliferation.			8	8	8	5	8	8	8	1	1	1
10.1101/2025.06.28.662120	Tissue architecture dynamics underlying immune development and decline in the thymus	I hypothesise that increased antigen-presenting cell presence in aged thymic medullary regions directly causes reduced TCR diversity.	I hypothesise that increased antigen-presenting cell presence in aged thymic medullary regions does not directly cause reduced TCR diversity.			5	8	7	8	9	5	5	5	5	5
10.1101/2025.06.27.661680	Lonafarnib Partially Reverses Cardiac Senescence in Human and Mouse Progeria Models via Autophagy Activation	I hypothesise lonafarnib partially reverses cardiac senescence in HGPS by activating autophagy.	I hypothesise that lonafarnib does not partially reverse cardiac senescence in HGPS by activating autophagy.			8	9	7	7	8	7	7	10	8	1
10.1101/2025.06.29.662228	Pro-longevity compounds extend Caenorhabditis elegans male lifespan and reproductive healthspan	I hypothesise sulforaphane improves C. elegans male mating success in late life.	I hypothesise that sulforaphane does not improve C. elegans male mating success in late life.			8	8	8	5	9	8	7	10	5	1
10.1101/2025.07.08.663620	NuMA promotes constitutive heterochromatin compaction by stabilizing linker histone H1 on chromatin	I hypothesise that NuMA depletion accelerates cellular senescence by disrupting heterochromatin compaction and increasing LTR element transcription.	I hypothesise that NuMA depletion does not accelerate cellular senescence by disrupting heterochromatin compaction and does not increase LTR element transcription.			8	9	8	5	8	9	8	2	5	1
10.1101/2025.07.07.663438	Different ways to die: harnessing variation in Drosophila reveals loss of tolerance and resistance over age and sex-specific association between infection susceptibility and lifespan	I hypothesise that reduced tolerance, not just immune resistance, drives increased infection susceptibility with age in Drosophila.	I hypothesise that increased tolerance, rather than immune resistance, does not drive decreased infection susceptibility with age in Drosophila.			5	5	8	10	9	7	9	7	7	5
10.1101/2025.07.09.663908	Multi-omics characterization of the skin microbiota reveals the anti-aging roles of Stenotrophomonas maltophilia	I hypothesise Stenotrophomonas maltophilia's glutathione cycle activity directly reduces oxidative stress markers in aged skin fibroblasts.	I hypothesise that Stenotrophomonas maltophilia's glutathione cycle activity does not directly reduce oxidative stress markers in aged skin fibroblasts.			8	8	5	7	7	8	10	5	5	5
10.1101/2025.07.07.663471	Investigating Age-Related Decline in Sensorimotor Control Using Robotic Tasks	I hypothesise that older adults will exhibit significantly longer movement durations than younger adults in the viscous force field task.	I hypothesise that older adults will not exhibit significantly longer movement durations than younger adults in the viscous force field task.			5	8	8	5	7	7	9	1	7	1
10.1101/2025.07.08.659677	Characterization of a core fungal community and captivity-induced "mycobiome" change in Fowler's Toad (Anaxyrus fowleri)	I hypothesise that captive Fowler's Toads will exhibit reduced fungal diversity compared to wild toads.	I hypothesise that captive Fowler's Toads will exhibit increased fungal diversity compared to wild toads.			1	1	9	7	8	9	7	2	5	5
10.1101/2025.07.04.663088	Glucose enrichment accelerates C. elegans reproductive aging via non-autonomous DAF-2/insulin-like receptor signaling in somatic tissues	I hypothesise that reducing DAF-2 signaling in C. elegans intestine prevents glucose-induced reproductive aging.	I hypothesise that reducing DAF-2 signaling in C. elegans intestine does not prevent glucose-induced reproductive aging.			8	8	9	5	8	7	7	9	1	1
10.1101/2025.07.01.662674	Community Socioeconomic Disadvantage relates to White Matter Hyperintensity Burden in Mid-to-Late Life Adults	I hypothesise that higher community socioeconomic disadvantage is associated with increased cellular senescence markers in brain tissue.	I hypothesise that higher community socioeconomic disadvantage is not associated with increased cellular senescence markers in brain tissue.			5	8	8	7	7	7	1	5	5	1
10.1101/2025.07.04.663080	Palbociclib CDK4/6- and Crizotinib MET/ALK/ROS1-inhibitors Synergize to Enhance Senescence and Immune Recognition in Melanoma Cells Independently of BRAF/NRAS Status	I hypothesise that palbociclib and crizotinib synergistically increase SASP factor expression in melanoma cells.	I hypothesise that palbociclib and crizotinib do not synergistically increase SASP factor expression in melanoma cells.			1	8	8	7	7	8	7	5	5	5
10.1101/2025.07.04.663109	C2-ÃƒÆ’Ã…Â½Ãƒâ€šÃ‚Â±-dicarbonyls selectively impair morphodynamic interactions between cells and extracellular matrix	I hypothesise methylglyoxal (MGO) at low concentrations selectively impairs endothelial and cancer cell adhesion to laminin-rich basement membrane.	I hypothesise that methylglyoxal (MGO) at low concentrations does not selectively impair endothelial and cancer cell adhesion to laminin-rich basement membrane.			8	8	7	7	7	7	7	9	5	1
10.1101/2025.07.03.663079	How muscle ageing affects rapid goal-directed movement: mechanistic insights from a simple model	I hypothesise that reduced maximum isometric force in aged muscle directly impairs rapid goal-directed movement performance.	I hypothesise that reduced maximum isometric force in aged muscle does not directly impair rapid goal-directed movement performance.			8	7	9	7	7	9	8	10	5	5
10.1101/2025.07.02.662700	Education Shapes the Link Between EEG Aperiodic Components and Cognitive Aging	I hypothesise that higher education levels will attenuate the age-related decline in EEG aperiodic exponent and offset.	I hypothesise that higher education levels will not attenuate the age-related decline in EEG aperiodic exponent and offset.			8	8	8	7	9	9	8	7	5	1
10.1101/2025.07.04.663236	Eccentric cycling enhances primary motor cortex excitability	I hypothesise eccentric cycling increases M1 excitability more than concentric cycling.	I hypothesise that eccentric cycling does not increase M1 excitability more than concentric cycling.			1	1	9	8	7	7	7	5	5	5
10.1101/2025.07.03.662930	Mx1-Cre-mediated Rac1 knockout confers multiple protective effects against anthracycline-induced acute normal tissue injury	I hypothesise that Rac1 deficiency reduces doxorubicin-induced senescence markers in the heart and kidney.	I hypothesise that Rac1 deficiency does not reduce doxorubicin-induced senescence markers in the heart and kidney.			8	8	8	7	7	8	7	1	8	1
10.1101/2025.07.02.660568	A transcriptomic approach to understand genetic networks of regeneration, cell plasticity, and longevity of the Immortal Jellyfish Turritopsis dohrnii (Cnidaria, Hydrozoa)	I hypothesise that increased expression of SIRT3 in Turritopsis dohrnii during life cycle reversal promotes cellular plasticity.	I hypothesise that increased expression of SIRT3 in Turritopsis dohrnii during life cycle reversal does not promote cellular plasticity.			8	8	6	5	8	7	7	1	7	1
10.1101/2025.07.02.662754	Liver Kinome Profiling Identifies PS1145 as a Potential Therapeutic molecule for amelioration of Systemic Inflammation in Alcohol-related Liver Disease	I hypothesise that PS1145 treatment reduces systemic inflammation markers in alcohol-related liver disease patients.	I hypothesise that PS1145 treatment does not reduce systemic inflammation markers in alcohol-related liver disease patients.			5	8	10	5	7	8	8	5	5	1
10.1101/2025.07.01.662628	Thermogenic Adipose ADH5 Counteracts Age-related Metabolic Decline	I hypothesise that ADH5 deletion in brown adipose tissue accelerates cellular senescence in aged mice.	I hypothesise that ADH5 deletion in brown adipose tissue does not accelerate cellular senescence in aged mice.			8	8	9	7	7	8	8	5	5	8
10.1101/2025.07.10.664158	Modelling perceptual uncertainty in a thermosensory illusion across the lifespan	I hypothesise that older adults will exhibit a higher prevalence of the "unsure perceiver" profile in the paradoxical heat sensation illusion.	I hypothesise that older adults will not exhibit a higher prevalence of the "unsure perceiver" profile in the paradoxical heat sensation illusion.			1	8	8	7	9	7	7	7	5	5
10.1101/2025.07.10.664177	Making a clean break: contrasting leaf abscission dynamics across temperate leaf habits	I hypothesise that higher chlorophyll retention during senescence correlates with delayed abscission zone competency in deciduous trees.	I hypothesise that higher chlorophyll retention during senescence does not correlate with delayed abscission zone competency in deciduous trees.			8	9	7	8	8	8	7	5	5	5
10.1101/2025.07.09.664028	Fever induces long-term synaptic enhancement and protects learning in an accelerated aging model	I hypothesise that repeated fever induction in aged rats will reverse D-galactose-induced synaptic loss in the prefrontal cortex.	I hypothesise that repeated fever induction in aged rats will not reverse D-galactose-induced synaptic loss in the prefrontal cortex.			1	10	8	10	8	7	7	3	5	1
10.1101/2025.07.09.664017	Aging-Associated Nox4-Mediated Mitochondrial ROS and DNA Damage Promote Vascular Cell Reprogramming and Aortic Remodeling in Abdominal Aneurysms	I hypothesise that inhibiting NOX4 reduces vascular cell reprogramming and aortic remodeling in aging mice.	I hypothesise that inhibiting NOX4 does not reduce vascular cell reprogramming and aortic remodeling in aging mice.			9	8	9	8	7	7	8	10	5	1
10.1101/2025.07.09.663910	Neurophysiological correlates of passive movements are speed- and type-dependent	I hypothesise that increased passive movement speed reduces frontal cortex inhibition in younger and older adults.	I hypothesise that increased passive movement speed does not reduce frontal cortex inhibition in younger and older adults.			5	5	7	9	9	9	8	5	8	1
10.1101/2025.07.09.663930	The selective amyloid-driven failure of cholinergic medial septal neurons in aging mice perturbs REM sleep, cognition and emotion, and broadcasts amyloid to other brain regions	I hypothesise that amyloid accumulation in medial septal cholinergic neurons causes REM sleep deficits in aging mice.	I hypothesise that amyloid accumulation in medial septal cholinergic neurons does not cause REM sleep deficits in aging mice.			8	8	8	8	8	7	8	7	5	1
10.1101/2025.07.08.663800	IsoDGR-Induced Endothelial Cytoskeletal Disruption Drives Age-Related Blood-Brain Barrier Breakdown	I hypothesise that isoDGR accumulation in brain endothelial cells directly causes cytoskeletal collapse and BBB breakdown.	I hypothesise that isoDGR accumulation in brain endothelial cells does not directly cause cytoskeletal collapse and BBB breakdown.			8	9	8	8	7	8	7	5	1	1
10.1101/2025.07.11.664440	RICTOR regulates an interspecies crosstalk that influences longevity through a novel methionine cycle-mitophagy axis	I hypothesise that RICTOR loss-of-function increases longevity in C. elegans by promoting methionine cycle-mitophagy axis activation.	I hypothesise that RICTOR loss-of-function does not increase longevity in C. elegans by promoting methionine cycle-mitophagy axis activation.			8	8	10	7	7	7	8	5	7	1
10.1101/2025.07.12.664497	Thioredoxin-1 inhibits granulosa cell ferroptosis to rescue ovarian aging through mitophagy-dependent activation of BNIP3L	I hypothesise that increasing thioredoxin-1 expression in aged granulosa cells will reduce ferroptosis markers.	I hypothesise that increasing thioredoxin-1 expression in aged granulosa cells will not reduce ferroptosis markers.			8	8	8	7	8	8	8	7	8	1
10.1101/2025.07.09.663822	Autophagy-driven Presynaptic Reorganization as a Molecular Signature of Brain Resilience.	I hypothesise that impaired autophagy in mushroom body neurons directly causes presynaptic active zone scaffold protein upregulation.	I hypothesise that impaired autophagy in mushroom body neurons does not directly cause presynaptic active zone scaffold protein upregulation.			8	9	5	7	7	8	7	7	5	1
10.1101/2025.07.09.663827	Integrated Single-Cell and Spatial Transcriptomic Analysis Reveals an Aging-Associated Fibroblast Subtype Linked to Tumor Progression in Human Skin	I hypothesise that SFRP2+ fibroblasts promote Wnt signaling in aged skin tumor microenvironments.	I hypothesise that SFRP2+ fibroblasts do not promote Wnt signaling in aged skin tumor microenvironments.			8	8	5	7	7	7	5	7	5	5
10.1101/2025.07.08.663725	Cellular basis for cortical network aging in primates	I hypothesise that reduced parvalbumin-enriched chandelier cell numbers correlate with decreased cortical network strength in aging macaques.	I hypothesise that reduced parvalbumin-enriched chandelier cell numbers do not correlate with decreased cortical network strength in aging macaques.			8	5	9	7	8	8	8	5	5	5
10.1101/2025.07.09.663484	UVA irradiation promotes ROS-mediated formation of the common deletion in mitochondrial DNA	I hypothesise that UVA irradiation increases mitochondrial DNA common deletion formation in human skin fibroblasts via elevated reactive oxygen species.	I hypothesise that UVA irradiation does not increase mitochondrial DNA common deletion formation in human skin fibroblasts via elevated reactive oxygen species.			7	8	9	5	7	7	9	1	5	10
10.1101/2025.07.15.664949	Optogenetic inhibition reveals distinct contributions of medial prefrontal cortex to intertemporal choice in young and aged rats	I hypothesise that optogenetic mPFC inactivation during deliberation increases delay discounting in young rats.	I hypothesise that optogenetic mPFC inactivation during deliberation does not increase delay discounting in young rats.			1	8	9	7	5	1	8	5	1	1
10.1101/2025.07.15.664976	Whole blood transcriptional signatures of age and survival identified in Long Life Family and Integrative Longevity Omics Studies	I hypothesise that upregulation of IFN-gamma response transcripts in whole blood predicts increased mortality risk.	I hypothesise that upregulation of IFN-gamma response transcripts in whole blood does not predict increased mortality risk.			5	7	9	7	5	9	9	5	5	1
10.1101/2025.07.15.664959	NADÃƒÆ’Ã‚Â¢Ãƒâ€šÃ‚Â_x0081_Ãƒâ€šÃ‚Âº Replenishment Mitigates Cardiomyocyte Senescence and Corrects Heart Failure with Preserved Ejection Fraction in Aged Mice	I hypothesise that NADÃƒÆ’Ã‚Â¢Ãƒâ€šÃ‚Â_x0081_Ãƒâ€šÃ‚Âº replenishment with NRH reduces cardiomyocyte senescence markers in aged mice.	I hypothesise that NAD+ replenishment with NRH does not reduce cardiomyocyte senescence markers in aged mice.			5	8	7	5	7	7	8	7	7	1
10.1101/2025.07.14.664722	Discovery of a pyrazolopyridine alkaloid inhibitor of ERO1A that mitigates neuronal ER stress and age-related decline	I hypothesise that S88 treatment reduces cellular senescence markers in aged neurons.	I hypothesise that S88 treatment does not reduce cellular senescence markers in aged neurons.			8	10	8	10	8	9	5	3	5	1
10.1101/2025.07.14.664701	Suppression rather than activation of the integrated-stress-response (GCN2-ATF4) pathway extends lifespan in the fly	I hypothesise that chronic suppression of the GCN2-ATF4 pathway in flies extends lifespan.	I hypothesise that chronic suppression of the GCN2-ATF4 pathway in flies does not extend lifespan.			8	9	8	7	7	8	8	1	5	1
10.1101/2025.07.14.664648	LIPL-1 and LIPL-2 are TCER-1-regulated Lysosomal Lipases with Distinct Roles in Immunity and Fertility	I hypothesise that lipl-1 promotes longevity by catalyzing ceramide accumulation during stress.	I hypothesise that lipl-1 does not promote longevity by catalyzing ceramide accumulation during stress.			8	8	7	7	7	7	5	5	5	1
10.1101/2025.07.16.665222	Dermal fibroblast cultures recapitulate differences between deermice and mice in responses to a Toll-like receptor agonist	I hypothesise deermouse fibroblasts exhibit higher Nrf2 activity than mouse fibroblasts, contributing to their longevity in culture.	I hypothesise that deermouse fibroblasts do not exhibit higher Nrf2 activity than mouse fibroblasts, not contributing to their longevity in culture.			1	5	8	5	9	8	5	5	8	5
10.1101/2025.07.14.664468	Nuclear Hormone Receptor NHR-49/HNF4ÃƒÆ’Ã…Â½Ãƒâ€šÃ‚Â± Couples Fertility Regulation to Resource Allocation and Longevity in C. elegans	I hypothesise that NHR-49 represses GSA-1 expression in gonadal sheath cells to prevent premature oocyte activation.	I hypothesise that NHR-49 does not repress GSA-1 expression in gonadal sheath cells and does not prevent premature oocyte activation.			5	8	7	7	9	7	8	2	5	5
10.1101/2025.07.18.663475	Pupil dilation as a marker of attention/effort in aging and mild cognitive impairment	I hypothesise that individuals with MCI will exhibit greater pupil dilation to salient stimuli compared to healthy older adults.	I hypothesise that individuals with MCI will not exhibit greater pupil dilation to salient stimuli compared to healthy older adults.			5	8	8	8	8	8	5	7	7	5
10.1101/2025.07.13.664445	Age and early life adversity shape heterogeneity of the epigenome across tissues in macaques	I hypothesise that early life adversity accelerates epigenetic aging in macaques across multiple tissues.	I hypothesise that early life adversity does not accelerate epigenetic aging in macaques across multiple tissues.			7	8	8	7	8	7	8	5	5	1
10.1101/2025.07.11.664220	Comparative analysis of naked mole-rat thermogenesis and its potential to maintain euthermia in response to cold	I hypothesise that naked mole-rats exhibit reduced UCP1 expression compared to mice, limiting their non-shivering thermogenesis.	I hypothesise that naked mole-rats do not exhibit reduced UCP1 expression compared to mice, enhancing their non-shivering thermogenesis.			8	5	9	9	8	9	8	5	5	8
10.1101/2025.07.11.664466	A multi-omics analysis of human fibroblasts overexpressing an Alu transposon reveals widespread disruptions in aging-associated pathways	I hypothesise that overexpressing Alu transposons in human fibroblasts induces cellular senescence markers.	I hypothesise that overexpressing Alu transposons in human fibroblasts does not induce cellular senescence markers.			8	8	7	7	7	8	8	9	5	1
10.1101/2025.07.11.664388	Inflammaging in aged tissues drives remodeling of the CD8+ T cell compartment	I hypothesise that inflammaging in aged adipose tissue drives the accumulation of GZMK+ CD8+ T cells.	I hypothesise that inflammaging in aged adipose tissue does not drive the accumulation of GZMK+ CD8+ T cells.			8	8	7	10	8	7	5	1	5	1
10.1101/2025.07.22.666241	Far-Red Light in Early Growth Stages Boosts Lettuce Biomass and Preserves Anthocyanins	I hypothesise that supplemental far-red light during early lettuce growth increases biomass by promoting canopy expansion.	I hypothesise that supplemental far-red light during early lettuce growth does not increase biomass by promoting canopy expansion.			5	8	8	7	7	7	8	5	8	1
10.1101/2025.07.16.665060	Association of handgrip strength asymmetry and weakness with successful aging among older adults in China	I hypothesise that older adults with greater handgrip strength asymmetry will have a lower likelihood of successful aging.	I hypothesise that older adults with greater handgrip strength asymmetry will have a higher likelihood of successful aging.			5	1	9	8	8	1	8	5	5	8
10.1101/2025.07.21.665982	MICRORNAS REGULATED BY PREGNANCY TARGET THE HIV INTERACTOME	I hypothesise pregnancy-modulated miRNAs downregulate cellular senescence pathways, increasing HIV susceptibility.	I hypothesise that pregnancy-modulated miRNAs do not downregulate cellular senescence pathways, decreasing HIV susceptibility.			8	8	8	5	8	7	5	5	5	1
10.1101/2025.07.21.665894	Impairment of neuronal activity occurs at the early stages of the aggregation cascade of Ab1-42 and mutant Tau	I hypothesise that early expression of A{beta} in C. elegans neurons reduces neuronal activity before visible aggregate formation.	I hypothesise that early expression of A{beta} in C. elegans neurons does not reduce neuronal activity before visible aggregate formation.			7	10	10	7	7	8	9	9	1	5
10.1101/2025.07.18.665576	Mild subcortical stroke induces widespread astrogliosis independent of microglia and age	I hypothesise that reactive astrogliosis following mild subcortical stroke is independent of microglial activation.	I hypothesise that reactive astrogliosis following mild subcortical stroke is dependent on microglial activation.			8	10	5	10	9	9	9	9	1	8
10.1101/2025.07.17.665393	Different dopaminergic circuits defined by D2/D3 receptor availablity patterns show structure-specific links to memory in ageing	I hypothesise higher caudate D2/D3 receptor availability is associated with increased short-term false memories in older adults.	I hypothesise that higher caudate D2/D3 receptor availability is not associated with increased short-term false memories in older adults.			8	8	7	7	8	9	5	5	5	5
10.1101/2025.07.17.665387	Linking White Matter Integrity to Recognition Memory Speed: Fixel-Based and Fornix Analyses in Young to Middle Adulthood	I hypothesise that higher fiber density in left frontoparietal tracts is associated with slower recognition memory speed in middle-aged adults.	I hypothesise that higher fiber density in left frontoparietal tracts is not associated with slower recognition memory speed in middle-aged adults.			8	5	10	8	7	7	5	5	5	5
10.1101/2025.07.20.665707	Functional Connectome of Superagers Reveals Early Markers of Resilience and Vulnerability to Alzheimers Disease	I hypothesise that the Alzheimers-resilient connectome (ARC) signature predicts slower cognitive decline in cognitively unimpaired older adults.	I hypothesise that the AlzheimerÃ¢â‚¬â„¢s-resilient connectome (ARC) signature does not predict slower cognitive decline in cognitively unimpaired older adults.			1	9	8	5	7	7	9	7	8	1
10.1101/2025.07.21.665900	Differential sensitivity to LINE 1-induced damage contributes to the expansion of Tet2-deficient HSCs upon chronic inflammatory stress	I hypothesise that Tet2 deficiency protects HSCs from chronic inflammation-induced LINE-1 derepression and DNA damage.	I hypothesise that Tet2 deficiency does not protect HSCs from chronic inflammation-induced LINE-1 derepression and DNA damage.			5	8	8	7	7	9	6	10	5	1
10.1101/2025.07.21.665839	Extended G2/M arrests lead to aberrant mitoses and cell death due to excessive securin	I hypothesise that increased securin levels in mammalian cells undergoing prolonged G2/M arrest contribute to cellular senescence.	I hypothesise that increased securin levels in mammalian cells undergoing prolonged G2/M arrest do not contribute to cellular senescence.			8	8	8	7	9	7	8	10	5	1
10.1101/2025.07.21.647696	HTRA3 protease-chaperone stabilizes cathepsin B for mitochondrial POLG1 depletion in human cell ageing	I hypothesise that inhibiting HTRA3 chaperone activity will prevent cathepsin B stabilization and POLG1 degradation in senescent cells.	I hypothesise that inhibiting HTRA3 chaperone activity will not prevent cathepsin B stabilization and will not lead to POLG1 degradation in senescent cells.			8	8	8	5	7	10	5	5	5	1
10.1101/2025.07.18.664980	Endothelial Nucleoporin93 (Nup93) Maintains Vascular Function via Sun1-Dependent Regulation of RhoA-eNOS Signaling	I hypothesise that endothelial Nup93 deficiency accelerates age-associated vasoconstriction by reducing eNOS expression.	I hypothesise that endothelial Nup93 deficiency does not accelerate age-associated vasoconstriction by reducing eNOS expression.			8	9	9	1	9	9	4	5	5	1
10.1101/2025.07.17.665449	Matrix Stiffening Induces Mechanical Memory and Nuclear Fragility in Cardiomyocytes via Microtubule-Lamin Coupling	I hypothesise that inhibiting alpha-tubulin detyrosination prevents mechanical memory and nuclear fragility in cardiomyocytes.	I hypothesise that inhibiting alpha-tubulin detyrosination does not prevent mechanical memory and nuclear fragility in cardiomyocytes.			8	8	8	7	8	1	10	5	1	1
10.1101/2025.07.20.665772	A new double reporter strategy reveals a subset of non-migratory hematopoietic stem cells localized in a dynamic bone marrow niche.	I hypothesise that Hoxb5+Vwf+ HSCs are non-migratory due to direct interaction with LepR+ perivascular cells.	I hypothesise that Hoxb5+Vwf+ HSCs are migratory despite having direct interaction with LepR+ perivascular cells.			8	7	7	9	9	8	5	8	5	5
10.1101/2025.07.16.665215	Maladaptive inflammatory signaling in old mice impairs colonic regeneration by promoting a sustained fetal-like epithelial state	I hypothesise that inhibiting IFNÃƒÆ’Ã…Â½Ãƒâ€šÃ‚Â³ signaling in old mice will restore colonic regenerative capacity after C. rodentium infection.	I hypothesise that inhibiting IFNÃŽÂ³ signaling in old mice will not restore colonic regenerative capacity after C. rodentium infection.			7	8	7	8	7	7	7	1	5	1
10.1101/2025.01.06.631470	Transcriptional Integration of Meiotic Prophase I Progression and Early Oocyte Differentiation	I hypothesise that TAF4b deficiency impairs double-strand DNA break repair in fetal oocytes.	I hypothesise that TAF4b deficiency does not impair double-strand DNA break repair in fetal oocytes.			8	7	8	6	8	7	7	1	5	8
10.1101/2025.01.06.631437	NNMT promotes tubular senescence and fibrosis in chronic kidney disease	I hypothesise that inhibiting NNMT in chronic kidney disease reduces tubular senescence and fibrosis.	I hypothesise that inhibiting NNMT in chronic kidney disease does not reduce tubular senescence and fibrosis.			8	8	8	10	7	8	10	5	5	1
10.1101/2025.07.24.666499	GÃƒÆ’Ã…Â½Ãƒâ€šÃ‚Â±q/11 signaling counteracts endothelial dysfunction in the brain and protects cognition in aged mice	I hypothesise that GÃƒÆ’Ã…Â½Ãƒâ€šÃ‚Â±q/11 signaling in brain endothelial cells prevents tau phosphorylation in aged mice.	I hypothesise that GÃƒÆ’Ã…Â½Ãƒâ€šÃ‚Â±q/11 signaling in brain endothelial cells does not prevent tau phosphorylation in aged mice.			8	8	9	5	7	8	8	5	5	5
10.1101/2025.07.24.666513	Prediction and updating abilities in motor imagery during the Timed Up and Go task in young and older adults	I hypothesise that older adults' prediction accuracy in motor imagery is positively correlated with executive function.	I hypothesise that older adults' prediction accuracy in motor imagery is negatively correlated with executive function.			8	5	8	9	7	8	8	2	8	5
10.1101/2025.07.28.667204	Sphingosine synergizes with polymyxin antibiotics to kill Gram-negative bacteria	I hypothesise sphingosine reduces polymyxin MIC against P. aeruginosa by disrupting bacterial membrane integrity.	I hypothesise that sphingosine does not reduce polymyxin MIC against P. aeruginosa by disrupting bacterial membrane integrity.			5	8	9	7	7	9	8	1	5	1
10.1101/2025.07.25.666837	Rapamycin Reverses the Hepatic Response to Diet-Induced Metabolic Stress That Is Amplified by Aging.	I hypothesise that rapamycin treatment will reduce hepatic steatosis in old mice fed a high-fat diet.	I hypothesise that rapamycin treatment will not reduce hepatic steatosis in old mice fed a high-fat diet.			8	8	8	6	7	9	9	5	8	1
10.1101/2025.07.24.666371	Single cell decomposition of multicellular aging programs associated with impaired lung regeneration	I hypothesise that Granzyme K-high CD8+ T cells directly induce epithelial progenitor senescence in aged lungs.	I hypothesise that Granzyme K-high CD8+ T cells do not directly induce epithelial progenitor senescence in aged lungs.			5	8	7	1	7	7	8	1	5	5
10.1101/2025.07.24.666635	GreenLeafVI: A FIJI plugin for high-throughput analysis of leaf chlorophyll content	I hypothesise GreenLeafVI plugin accuracy correlates with leaf age.	I hypothesise that GreenLeafVI plugin accuracy does not correlate with leaf age.			5	8	8	7	8	8	7	9	5	5
10.1101/2025.07.25.666782	A sublethal drought and rewatering time course reveals intricate patterning of responses in the annual Arabidopsis thaliana	I hypothesise drought stress causes transcriptional rejuvenation in Arabidopsis thaliana.	I hypothesise that drought stress does not cause transcriptional rejuvenation in Arabidopsis thaliana.			1	8	7	7	7	9	8	1	5	1
10.1101/2025.07.23.666165	Cognitive training effects are shaped more by individual brain dynamics than age - Evidence from younger and older women	I hypothesise that cognitive training efficacy is directly proportional to an individual's baseline neural self-similarity.	I hypothesise that cognitive training efficacy is not directly proportional to an individual's baseline neural self-similarity.			8	8	7	5	7	8	5	7	5	5
10.1101/2025.07.25.666728	Transient DNA methyltransferase 3a (DNMT3a) Inhibition Unlocks dedifferentiation and Neurogenic Potential in Mouse Retinal MuÃƒÆ’Ã…â€™Ãƒâ€¹Ã¢â‚¬ ller Glia	I hypothesise that transient DNMT3a inhibition in aged mouse retinal MÃƒÆ’Ã†â€™Ãƒâ€šÃ‚Â¼ller glia will restore neurogenic potential.	I hypothesise that transient DNMT3a inhibition in aged mouse retinal MÃƒÂ¼ller glia will not restore neurogenic potential.			5	8	7	7	8	7	9	1	8	5
10.1101/2025.07.24.665914	Normal aging impacts the extent and diversity of neural plasticity induced in the mouse brain with repetitive transcranial magnetic stimulation	I hypothesise that rTMS induces greater diversity of neural plasticity gene expression changes in young adult mouse brains compared to aged mouse brains.	I hypothesise that rTMS does not induce greater diversity of neural plasticity gene expression changes in young adult mouse brains compared to aged mouse brains.			8	8	8	7	7	7	5	9	5	1
10.1101/2025.07.24.663565	Restriction of individual branched-chain amino acids has distinct effects on the development and progression of Alzheimers disease in 3xTg mice	I hypothesise isoleucine restriction delays Alzheimer's disease progression in male 3xTg mice.	I hypothesise that isoleucine restriction does not delay Alzheimer's disease progression in male 3xTg mice.			10	9	7	8	7	7	8	8	8	1
10.1101/2025.07.22.666172	C1q limits cystoid edema by maintaining basal beta-catenin-dependent signaling and blood-retina barrier function	I hypothesise that C1q deficiency exacerbates age-related blood-retina barrier dysfunction.	I hypothesise that C1q deficiency does not exacerbate age-related blood-retina barrier dysfunction.			8	8	9	7	7	9	8	5	5	8
10.1101/2025.07.22.665978	The Old genetically heterogeneous Mouse Model Recapitulates Chronic and Persistent Idiopathic Pulmonary Fibrosis with Strong Senescence Signatures	I hypothesise that increased cellular senescence burden in aged mice directly drives persistent pulmonary fibrosis after bleomycin exposure.	I hypothesise that increased cellular senescence burden in aged mice does not directly drive persistent pulmonary fibrosis after bleomycin exposure.			8	9	8	7	7	10	8	5	5	5
10.1101/2025.07.28.667250	Sigma-1 Receptor Promotes Glycolysis in Neuronal Systems by Suppressing GRIM19	I hypothesise that sigma-1 receptor activation increases neuronal glycolysis by suppressing GRIM19.	I hypothesise that sigma-1 receptor activation does not increase neuronal glycolysis by suppressing GRIM19.			8	8	6	7	7	9	5	5	5	1
10.1101/2025.07.28.667124	Modelling APOL1-mediated kidney inflammation and fibrosis using a partially reprogrammed urine derived SIX2-positive renal progenitor cell line.	I hypothesise that partial reprogramming reduces senescence markers p21 and p53 in renal progenitor cells.	I hypothesise that partial reprogramming does not reduce senescence markers p21 and p53 in renal progenitor cells.			8	1	9	8	8	7	7	5	8	1
10.1101/2025.07.25.666856	Characterizing a hallmark of glymphatic insufficiency: Wasteosomes accumulate in periventricular white matter hyperintensities and exhibit complex relationships with mixed pathology, sclerotic index and perivascular space	I hypothesise that increased wasteosome accumulation in periventricular white matter hyperintensities is associated with reduced glymphatic system function in aging brains.	I hypothesise that increased wasteosome accumulation in periventricular white matter hyperintensities is not associated with reduced glymphatic system function in aging brains.			5	8	9	10	7	8	8	5	5	5
10.1101/2025.01.07.631823	Niacin protects against vascular calcification via enhanced SIRT1 and SIRT6 signaling and promoted VSMC autophagy	I hypothesise niacin reduces vascular calcification by increasing SIRT1 and SIRT6 levels in VSMCs.	I hypothesise that niacin does not reduce vascular calcification by increasing SIRT1 and SIRT6 levels in VSMCs.			5	8	8	7	8	10	7	3	5	1
10.1101/2025.01.08.631686	Unique transcriptional profiles of adult human immature neurons in healthy aging, Alzheimer's disease, and cognitive resilience	I hypothesise immature neurons in the aged human hippocampus maintain homeostasis via juvenile cellular functions.	I hypothesise that immature neurons in the aged human hippocampus do not maintain homeostasis via juvenile cellular functions.			5	8	8	7	5	7	7	7	1	5
10.1101/2025.01.08.631992	JNK pathway suppression drives resistance to combination endocrine therapy and CDK4/6 inhibition in ER+ breast cancer	I hypothesise that restoring JNK signalling in ER+ breast cancer cells with MAP2K7 loss will re-sensitize them to endocrine therapy and CDK4/6 inhibition.	I hypothesise that restoring JNK signalling in ER+ breast cancer cells with MAP2K7 loss will not re-sensitize them to endocrine therapy and CDK4/6 inhibition.			5	8	8	7	8	8	7	1	8	5
10.1101/2025.01.09.632127	Modulation of cellular ageing regulates Integrated Stress Response signalling to control blood cell homeostasis	I hypothesise that decelerated cellular ageing in Drosophila lymph glands increases stem cell niche size.	I hypothesise that decelerated cellular ageing in Drosophila lymph glands does not increase stem cell niche size.			5	8	9	5	8	8	8	5	8	5
10.1101/2025.01.07.631808	Landscape of human protein-coding somatic mutations across tissues and individuals	I hypothesise that chromatin accessibility directly correlates with somatic mutation rates in human tissues.	I hypothesise that chromatin accessibility does not directly correlate with somatic mutation rates in human tissues.			8	9	8	7	8	5	8	3	5	1
10.1101/2025.01.08.631999	MicroRNA signatures of VO2peak in older adult participants of the Study of Muscle, Mobility and Aging	I hypothesise that miR-519a-3p expression levels are inversely correlated with VO2peak in older adults.	I hypothesise that miR-519a-3p expression levels are not inversely correlated with VO2peak in older adults.			5	1	8	8	7	7	8	7	5	5
10.1101/2025.01.06.631635	Growth Hormone Excess Drives Liver Aging via increased Glycation stress	I hypothesise that elevated growth hormone directly increases hepatic advanced glycation end product accumulation.	I hypothesise that elevated growth hormone does not directly increase hepatic advanced glycation end product accumulation.			5	8	7	8	9	5	9	7	1	5
10.1101/2025.01.07.631588	Mitigating Proinflammatory SASP and DAMP with Urolithin A: A Novel Senomorphic Strategy	I hypothesise Urolithin A reduces pro-inflammatory SASP factor release from senescent cells by downregulating cytosolic DNA release.	I hypothesise that Urolithin A does not reduce pro-inflammatory SASP factor release from senescent cells by upregulating cytosolic DNA release.			8	8	8	10	8	8	3	5	5	1
10.1101/2025.01.07.631721	Redox homeostasis in ferroptosis and aging: a causal role for fard-1 and dhs-25 in Caenorhabditis elegans	I hypothesise that inhibiting fard-1 or dhs-25 in C. elegans will increase ferroptosis sensitivity and shorten lifespan.	I hypothesise that inhibiting fard-1 or dhs-25 in C. elegans will decrease ferroptosis sensitivity and prolong lifespan.			8	5	9	8	7	9	8	5	5	8
10.1101/2025.01.06.631561	Methylglyoxal-induced glycation stress promotes aortic stiffening: Putative mechanistic roles of oxidative stress and cellular senescence	I hypothesise that methylglyoxal (MGO) directly induces cellular senescence in human aortic endothelial cells.	I hypothesise that methylglyoxal (MGO) does not directly induce cellular senescence in human aortic endothelial cells.			8	8	8	7	8	9	8	1	5	1
10.1101/2025.07.28.667181	Single-cell map of the healthy human immune system across the lifespan reveals unique infant immune signatures	I hypothesise that MAIT and gamma delta T cells decline with age due to decreased expression of specific transcription factors.	I hypothesise that MAIT and gamma delta T cells do not decline with age because of increased expression of specific transcription factors.			5	5	8	9	10	10	5	5	5	5
10.1101/2025.07.28.667102	Condition-dependent effects of knockdown of autophagy on C. elegans longevity	I hypothesise that atg-18 knockdown suppresses daf-2 longevity in C. elegans across varying temperatures and FUDR concentrations.	I hypothesise that atg-18 knockdown does not suppress daf-2 longevity in C. elegans across varying temperatures and FUDR concentrations.			8	9	10	7	9	7	1	7	5	1
10.1101/2025.07.27.667094	SATB1 maintains naive-like identity in antiviral CD8ÃƒÆ’Ã‚Â¢Ãƒâ€šÃ‚Â_x0081_Ãƒâ€šÃ‚Âº T cells by limiting chromatin remodelling at effector gene loci.	I hypothesise that SATB1 downregulation is essential for CD8+ T cell effector function and longevity.	I hypothesise that SATB1 downregulation is not essential for CD8+ T cell effector function and longevity.			8	10	9	5	10	10	9	7	5	5
10.1101/2025.07.26.666903	Recent lifestyle change impacts sleep and circadian rhythms among the Indigenous peoples of Peninsular Malaysia	I hypothesise that access to electricity leads to delayed sleep onset in Orang Asli adults.	I hypothesise that access to electricity does not lead to delayed sleep onset in Orang Asli adults.			10	5	7	7	7	7	8	5	5	8
10.1101/2025.07.26.666919	Dorsal Attention Network as a Convergent Hub of Diverse Non-pharmacological Interventions Preserving Functional Gradients and Cognition in Aging	I hypothesise that enhanced dorsal attention network connectivity mediates the cognitive benefits of non-pharmacological interventions in aging.	I hypothesise that enhanced dorsal attention network connectivity does not mediate the cognitive benefits of non-pharmacological interventions in aging.			7	8	8	1	8	8	9	5	5	5
10.1101/2025.07.28.666819	Aging and false memories: Comparing effects of item-relatedness and list position	I hypothesise older adults will exhibit a greater deficit in long-term memory recall compared to younger adults.	I hypothesise that older adults will not exhibit a greater deficit in long-term memory recall compared to younger adults.			1	10	9	4	7	5	9	5	8	8
10.1101/2025.07.26.666839	Retinal pigment epithelium-derived PD-L1 reprograms microglial cells and protects against retinal degeneration in mouse models of experimental AMD and genetic retinitis pigmentosa	I hypothesise that RPE-derived PD-L1 suppresses NF-ÃƒÆ’Ã…Â½Ãƒâ€šÃ‚ÂºB activation in microglia, reducing inflammation and protecting against retinal degeneration.	I hypothesise that RPE-derived PD-L1 does not suppress NF-ÃŽÂºB activation in microglia, increasing inflammation and not protecting against retinal degeneration.			8	8	7	8	7	8	5	7	5	5
10.1101/2025.07.28.665226	Age-associated microglia populations identified from several single cell transcriptome data	I hypothesise that upregulation of ribosomal genes in microglia precedes the development of age-associated microglial substates.	I hypothesise that upregulation of ribosomal genes in microglia does not precede the development of age-associated microglial substates.			8	8	8	7	7	8	8	5	5	1
10.1101/2025.07.25.666876	Aging-Associated Autoimmunity in Genetically Diverse UM-HET3 Mice Shows a Female Sex Bias	I hypothesise that female UM-HET3 mice aged 14-20 months will have higher levels of anti-nuclear antibodies than age-matched males.	I hypothesise that female UM-HET3 mice aged 14-20 months will not have higher levels of anti-nuclear antibodies than age-matched males.			1	9	8	8	9	8	8	5	5	5
10.1101/2025.07.25.666859	Young and old adult brains experience opposite effects of acute sleep restriction on the functional connectivity network	I hypothesise that acute sleep restriction strengthens functional connectivity in younger adults more than in older adults.	I hypothesise that acute sleep restriction does not strengthen functional connectivity in younger adults more than in older adults.			5	10	8	7	7	8	8	5	8	5
10.1101/2025.07.27.667071	Expression of the naked mole-rat transgene for Has2 improved health span in C57Bl/6 mice, but it did not attenuate age-related hearing loss.	I hypothesise that nmrHas2 expression improves mobility in aged mice.	I hypothesise that nmrHas2 expression does not improve mobility in aged mice.			8	8	8	5	9	8	1	2	5	1
10.1101/2025.07.30.667736	Metabolic dysfunction promoted by mitochondrial DNA mutation burden drives retinal degeneration	I hypothesise that increased mtDNA mutation burden in RPE cells leads to reduced GLUT-1 and MCT1 expression at the apical surface.	I hypothesise that increased mtDNA mutation burden in RPE cells does not lead to reduced GLUT-1 and MCT1 expression at the apical surface.			5	8	8	9	7	7	5	5	5	5
10.1101/2025.07.29.667420	The role of aging on endothelial cell-cell junctions and pulmonary microvascular permeability	I hypothesise that aged PMVEC exhibit increased basal permeability due to decreased {gamma}-catenin and claudin-5 protein levels.	I hypothesise that aged PMVEC do not exhibit increased basal permeability due to increased {gamma}-catenin and claudin-5 protein levels.			9	8	8	7	7	5	5	4	5	5
10.1101/2025.07.30.667432	Detecting Nuclear Pore Complex assembly in living cells	I hypothesise that nucleoporin sequestration on lipid droplets regulates NPC assembly kinetics.	I hypothesise that nucleoporin sequestration on lipid droplets does not regulate NPC assembly kinetics.			8	8	8	7	8	8	8	1	7	1
10.1101/2025.07.29.667542	Dual Targeting of MAPK Signaling and Senescence-Associated Survival Pathways Overcomes Vincristine Resistance in Fusion-Negative Rhabdomyosarcoma	I hypothesise that MEK inhibition in vincristine-resistant FN RMS cells will increase p21 expression and induce senescence.	I hypothesise that MEK inhibition in vincristine-resistant FN RMS cells will not increase p21 expression and will not induce senescence.			10	8	9	7	8	8	8	5	7	1
10.1101/2025.07.29.667507	Age-dependent topoisomerase I depletion alters recruitment of rDNA silencing complexes	I hypothesise that Top1 depletion in aging yeast cells directly causes genomic instability.	I hypothesise that Top1 depletion in aging yeast cells does not directly cause genomic instability.			8	8	8	8	8	7	8	8	1	1
10.1101/2025.07.29.667462	Age-Related Alterations in the Expression of Mesencephalic Astrocyte-derived Neurotrophic Factor in the Brain and Their Impact on Neurobehavioral Functions	I hypothesise that reduced MANF levels in aged mice directly cause impaired motor coordination in females.	I hypothesise that reduced MANF levels in aged mice do not directly cause impaired motor coordination in females.			8	8	8	7	8	7	8	5	5	5
10.1101/2025.08.01.668093	Robust and replicable effects of ageing on resting state brain electrophysiology measured with MEG.	I hypothesise that increased grey matter volume in older adults correlates with reduced age-related changes in resting-state MEG power spectra.	I hypothesise that increased grey matter volume in older adults does not correlate with reduced age-related changes in resting-state MEG power spectra.			1	5	9	5	7	8	8	5	8	5
10.1101/2025.07.31.667772	Cat brains age like humans: Translating Time shows pet cats live to be natural models for human aging	I hypothesise that pet cats exhibit cellular senescence markers comparable to humans in their 80s.	I hypothesise that pet cats do not exhibit cellular senescence markers comparable to humans in their 80s.			8	8	7	9	8	7	5	5	5	1
10.1101/2025.07.31.667659	Elevated brain ÃƒÆ’Ã…Â½Ãƒâ€šÃ‚Â±-synuclein, phosphorylated-tau, and oxidative stress in mice that survived influenza A pneumonitis	I hypothesise that influenza A pneumonitis survivors exhibit elevated brain ÃƒÆ’Ã…Â½Ãƒâ€šÃ‚Â±-synuclein levels compared to controls.	I hypothesise that influenza A pneumonitis survivors do not exhibit elevated brain ÃƒÆ’Ã…Â½Ãƒâ€šÃ‚Â±-synuclein levels compared to controls.			8	5	7	5	7	8	5	5	5	1
10.1101/2025.07.29.667417	Does Human Transthyretin Aggregate in Blood Plasma or in Cardiac Tissue? A Mathematical Modeling Study	I hypothesise that reducing transthyretin tetramer dissociation rate slows cardiac TTR amyloidosis progression.	I hypothesise that reducing transthyretin tetramer dissociation rate does not slow cardiac TTR amyloidosis progression.			8	8	8	5	8	7	8	7	8	1
10.1101/2025.07.29.667355	Profiling and Functional Analysis of Urinary Exosomal MicroRNAs in Pregnant Women with Systemic Lupus Erythematosus	I hypothesise that specific downregulated urinary exosomal miRNAs in late gestation pSLE are directly involved in regulating cellular senescence pathways.	I hypothesise that specific downregulated urinary exosomal miRNAs in late gestation pSLE are not directly involved in regulating cellular senescence pathways.			9	8	7	7	7	8	7	7	5	5
10.1101/2025.07.29.666777	Mechanisms of Cardiomyocyte Aging	I hypothesise that inhibiting DNMT3A in aged mouse hearts will reverse age-related cardiac remodeling and improve diastolic function.	I hypothesise that inhibiting DNMT3A in aged mouse hearts will not reverse age-related cardiac remodeling and will not improve diastolic function.			8	8	7	7	8	7	7	5	7	1
10.1101/2025.07.28.667253	New molecular players: siRNA expression and gene regulation in Hordeum vulgare ageing seeds after germination	I hypothesise that increased abundance of 22-nucleotide siRNAs correlates with reduced seed viability in Hordeum vulgare.	I hypothesise that increased abundance of 22-nucleotide siRNAs does not correlate with reduced seed viability in Hordeum vulgare.			1	8	8	10	8	7	7	5	5	5
10.1101/2025.07.28.667288	Host aging induces a senescent-like phenotype in neutrophils and altered transcriptional responses to Streptococcus pneumoniae	I hypothesise that aged neutrophils exhibit a senescent-like phenotype, characterized by increased SASP factor expression and beta-galactosidase activity.	I hypothesise that aged neutrophils do not exhibit a senescent-like phenotype, characterized by decreased SASP factor expression and reduced beta-galactosidase activity.			5	8	7	7	8	9	7	3	5	1
10.1101/2025.07.28.667309	GSNOR deletion differentially alters age-related cardiac function in a sex-dependent manner.	I hypothesise GSNOR deletion prevents age-related decrease in ejection fraction in male mice.	I hypothesise that GSNOR deletion does not prevent age-related decrease in ejection fraction in male mice.			8	8	8	7	9	7	8	5	5	5
10.1101/2025.07.30.667758	Modulation of biomolecular aggregate morphology and condensate infectivity	I hypothesise that increased salt concentration will promote the formation of thin fibrils from A1PrD.	I hypothesise that increased salt concentration will not promote the formation of thin fibrils from A1PrD.			1	9	9	7	7	8	7	10	5	1
10.1101/2025.08.08.669373	Corticothalamic circuit mechanisms underlying brain region and ageing variations in resting-state alpha activity	I hypothesise that reduced occipital intrathalamic activity with ageing directly correlates with decreased resting-state alpha power in occipital regions.	I hypothesise that reduced occipital intrathalamic activity with ageing does not directly correlate with decreased resting-state alpha power in occipital regions.			5	8	10	10	7	8	8	5	5	5
10.1101/2025.08.05.664214	The Placental Transcriptome Serves as a Mechanistic Link between Prenatal Phthalate Exposure and Placental Efficiency	I hypothesise that prenatal phthalate exposure increases placental cellular senescence markers.	I hypothesise that prenatal phthalate exposure does not increase placental cellular senescence markers.			8	9	9	1	7	7	8	5	5	1
10.1101/2025.08.04.668533	Exoproteome of calorie-restricted humans identifies complement deactivation as an immunometabolic checkpoint reducing inflammaging	I hypothesise that reducing C3a levels in aged mice will decrease inflammaging markers and improve metabolic homeostasis.	I hypothesise that reducing C3a levels in aged mice will not decrease inflammaging markers and will not improve metabolic homeostasis.			8	8	8	8	7	7	8	7	8	1
10.1101/2025.08.04.668575	RNA triggers chronic stress during neuronal aging	I hypothesise that inhibiting PKR in aged neurons will reduce cytoplasmic dsRNA accumulation and restore translation.	I hypothesise that inhibiting PKR in aged neurons will not reduce cytoplasmic dsRNA accumulation and will not restore translation.			8	8	8	7	8	7	1	5	8	1
10.1101/2025.08.02.668291	Exercise-induced plasma-derived extracellular vesicles increase adult hippocampal neurogenesis	I hypothesise that intraperitoneal injection of exercise-derived plasma extracellular vesicles into sedentary mice increases hippocampal neurogenesis.	I hypothesise that intraperitoneal injection of exercise-derived plasma extracellular vesicles into sedentary mice does not increase hippocampal neurogenesis.			5	8	8	7	8	7	8	5	8	1
10.1101/2025.08.01.668243	Targeting CyclinD1-CDK6 to Mitigate Senescence-Driven Inflammation and Age-Associated Functional Decline	I hypothesise that inhibiting CyclinD1-CDK6 with Palbociclib reduces SASP and ISG expression in senescent cells.	I hypothesise that inhibiting CyclinD1-CDK6 with Palbociclib does not reduce SASP and ISG expression in senescent cells.			8	8	9	1	8	7	8	5	8	1
10.1101/2025.07.31.667994	Microbiota/gut/neuron axis promotes Drosophila ageing via Acetobacter, Tachykinin, and TkR99D	I hypothesise that Acetobacter pomorum monoassociation in female Drosophila reduces lifespan by increasing Tachykinin expression.	I hypothesise that Acetobacter pomorum monoassociation in female Drosophila does not reduce lifespan by decreasing Tachykinin expression.			8	8	8	9	9	7	8	7	5	8
10.1101/2025.07.31.667910	CIAdex: Single-Cell FTIR Spectral Fingerprinting for Cell Identity Verification and Aging Quantification in Therapeutic Cell Manufacturing	I hypothesise that CIAdex's trPDL/trPN index correlates with known markers of cellular senescence.	I hypothesise that CIAdex's trPDL/trPN index does not correlate with known markers of cellular senescence.			8	8	6	10	7	8	8	5	8	5
10.1101/2025.07.30.667744	Chronic activation of a key exercise signal transducer, CaMKII, drives skeletal muscle aging and sarcopenia	I hypothesise that chronic CaMKII activation in aged skeletal muscle directly impairs mitochondrial function.	I hypothesise that chronic CaMKII activation in aged skeletal muscle does not directly impair mitochondrial function.			9	8	8	6	7	7	8	5	5	1
10.1101/2025.07.31.667878	Immune cell senescence drives responsiveness to immunotherapy in melanoma	I hypothesise that increased immune cell senescence in melanoma patients predicts a poorer response to immunotherapy.	I hypothesise that increased immune cell senescence in melanoma patients does not predict a poorer response to immunotherapy.			5	10	8	8	7	5	9	8	5	5
10.1101/2025.08.01.668202	Cyrene: A Novel Geroprotective Compound that Extends Lifespan and Healthspan in C. elegans and Drosophila	I hypothesise Cyrene administration before day 8 in C. elegans significantly increases mean lifespan compared to controls.	I hypothesise that Cyrene administration before day 8 in C. elegans does not significantly increase mean lifespan compared to controls.			5	8	7	7	7	10	9	8	8	5
10.1101/2025.07.30.667787	Mitochondrial Response to Psychological Stress and Its Medial Prefrontal Biomarker Correlates	I hypothesise that increased salivary cell-free mitochondrial DNA levels after psychological stress are associated with reduced dorsomedial prefrontal cortex thickness.	I hypothesise that increased salivary cell-free mitochondrial DNA levels after psychological stress are not associated with reduced dorsomedial prefrontal cortex thickness.			8	8	7	7	7	7	8	5	5	5
10.1101/2025.08.01.668095	Human tau compromises neuronal structural integrity in C. elegans promoted by age, stress and phosphorylation	I hypothesise that increased tau phosphorylation exacerbates age-dependent neuronal buckling in C. elegans.	I hypothesise that increased tau phosphorylation does not exacerbate age-dependent neuronal buckling in C. elegans.			8	8	8	7	8	7	8	3	5	1
10.1101/2025.08.01.667938	The effects of chronic social stress on cognitive flexibility in adult female macaques	I hypothesise that adult female macaques with chronic early-life social subordination stress will show impaired cognitive flexibility on the ID/ED task compared to controls.	I hypothesise that adult female macaques with chronic early-life social subordination stress will not show impaired cognitive flexibility on the ID/ED task compared to controls.			1	10	8	8	7	7	8	5	5	5
10.1101/2025.08.13.669664	Autophagic degradation of EIN3 ensures developmental plasticity and recovery from environmental stress in Arabidopsis	I hypothesise that inhibiting autophagy accelerates cellular senescence in Arabidopsis by increasing EIN3 accumulation.	I hypothesise that inhibiting autophagy does not accelerate cellular senescence in Arabidopsis by decreasing EIN3 accumulation.			5	8	9	7	9	7	7	5	1	1
10.1101/2025.08.12.669973	Whole-genome single-cell multimodal history tracing to reveal cell identity transition	I hypothesise that increased frequency of "identity jumps" in mouse brain cells correlates with accelerated aging phenotypes.	I hypothesise that increased frequency of "identity jumps" in mouse brain cells does not correlate with accelerated aging phenotypes.			7	8	7	7	8	7	5	5	5	1
10.1101/2025.08.12.669857	Immune dysregulation in the prostates of C57BL/6Aire-/- mice mirrors that seen in human benign prostatic hyperplasia	I hypothesise that C57BL/6Aire-/- mice will develop prostatic hyperplasia after 35 days of induced chronic inflammation.	I hypothesise that C57BL/6Aire-/- mice will not develop prostatic hyperplasia after 35 days of induced chronic inflammation.			5	5	8	5	8	8	8	7	5	1
10.1101/2025.08.11.669650	Chronic intestinal immune activation reveals separable impacts of inflammation and barrier loss on hallmarks of ageing.	I hypothesise that chronic intestinal immune activation independently accelerates aging hallmarks in Drosophila, even without microbiota.	I hypothesise that chronic intestinal immune activation does not independently accelerate aging hallmarks in Drosophila, even without microbiota.			5	8	7	10	7	7	8	7	5	1
10.1101/2025.08.11.668964	ROSMAP-Compass: A data-harmonised, AI-ready atlas of 22 million single nuclei from the ROSMAP cohort	I hypothesise that specific gene expression patterns in senescent cells correlate with Alzheimer's disease progression.	I hypothesise that specific gene expression patterns in senescent cells do not correlate with Alzheimer's disease progression.			8	8	9	8	5	7	8	5	5	1
10.1101/2025.08.14.670416	Reduced efficacy of an anti-toxin vaccine from senescence-driven attenuation of toxin virulence	I hypothesise that reduced ADAM10 activity in aged myeloid cells directly impairs anti-Hla antibody neutralization of alpha toxin.	I hypothesise that reduced ADAM10 activity in aged myeloid cells does not directly impair anti-Hla antibody neutralization of alpha toxin.			8	8	10	8	8	8	8	1	5	5
10.1101/2025.08.13.670057	Resistance Training Reshapes the Gut Microbiome for Better Health	I hypothesise that resistance training increases Faecalibacterium abundance in sedentary adults who achieve significant strength gains.	I hypothesise that resistance training does not increase Faecalibacterium abundance in sedentary adults who achieve significant strength gains.			5	8	7	5	8	8	1	5	8	5
10.1101/2025.08.11.669714	Proteostasis and Unfolded Protein Response Dynamics in Human Neuron and Mouse Glia Co-culture Reveal Cell-Specific Aging Responses	I hypothesise that aged human neurons exhibit reduced ER-to-Golgi transport compared to young neurons.	I hypothesise that aged human neurons do not exhibit reduced ER-to-Golgi transport compared to young neurons.			5	8	8	5	9	7	8	5	5	1
10.1101/2025.08.11.669596	Esca Disease triggers local transcriptomic response and systemic DNA methylation changes in grapevine	I hypothesise that esca disease accelerates grapevine aging by inducing systemic DNA methylation changes.	I hypothesise that esca disease does not accelerate grapevine aging and does not induce systemic DNA methylation changes.			8	8	7	7	8	9	8	7	1	10
10.1101/2025.08.11.669448	CircRNA-based, non-integrated, in vivo panCAR-mediated B cell immune resetting in mouse models and non-human primates	I hypothesise that circRNA-based in vivo panCAR therapy will reverse specific aging-associated phenotypes in 17-month-old mice.	I hypothesise that circRNA-based in vivo panCAR therapy will not reverse specific aging-associated phenotypes in 17-month-old mice.			7	9	8	7	9	8	5	1	5	5
10.1101/2025.08.08.669389	Aging-Associated Microbiota Drives Treg Dysfunction via TNF Signaling	I hypothesise that aged microbiota directly induces Treg cell senescence via TNF signaling in vivo.	I hypothesise that aged microbiota does not directly induce Treg cell senescence via TNF signaling in vivo.			5	8	8	5	8	8	7	5	5	1
10.1101/2025.08.07.668717	Aging-Driven Immunosuppression: The Role of Tregs in the Ovarian Tumor Microenvironment	I hypothesise that reducing succinate levels in aged ovarian tumor microenvironments will restore effector T cell activity.	I hypothesise that reducing succinate levels in aged ovarian tumor microenvironments will not restore effector T cell activity.			5	8	9	7	8	9	9	5	8	1
10.1101/2025.08.07.669175	Surgical Removal of Visceral Adipose Tissue has Therapeutic Benefit in Male APPNL-F Mice	I hypothesise that surgical removal of visceral adipose tissue in symptomatic male APPNL-F mice improves cognitive function by reducing hippocampal senescence.	I hypothesise that surgical removal of visceral adipose tissue in symptomatic male APPNL-F mice does not improve cognitive function and does not reduce hippocampal senescence.			8	8	7	8	7	8	8	5	7	5
10.1101/2025.08.08.669360	Local homeostasis preserves global neural dynamics compensating for structural loss during human lifespan aging	I hypothesise that invariant GABA concentrations preserve global neural dynamics during aging.	I hypothesise that variable GABA concentrations disrupt global neural dynamics during aging.			8	8	8	9	7	7	7	8	5	5
10.1101/2025.08.18.670800	Large vision model framework for automated C. elegans analysis: From static morphometry to dynamic neural activity	I hypothesise that TWARDIS improves the accuracy of C. elegans aging studies by reducing manual segmentation bias.	I hypothesise that TWARDIS does not improve the accuracy of C. elegans aging studies by increasing manual segmentation bias.			8	8	10	7	8	8	10	8	9	1
10.1101/2025.08.15.670559	Rapamycin exerts its geroprotective effects in the ageing human immune system by enhancing resilience against DNA damage	I hypothesise that low-dose rapamycin reduces DNA damage accumulation in human T cells from older adults.	I hypothesise that low-dose rapamycin does not reduce DNA damage accumulation in human T cells from older adults.			8	8	7	7	8	7	8	7	5	5
10.1101/2025.08.18.670808	Cell cycle dynamics regulate H3K27 and H3K9 histone modifications	I hypothesise that prolonged cell cycle arrest in aging cells leads to increased H3K9me3 and H3K27me3 levels.	I hypothesise that prolonged cell cycle arrest in aging cells does not lead to increased H3K9me3 and H3K27me3 levels.			8	9	8	8	7	7	8	7	5	1
10.1101/2025.08.18.669055	Uncovering the transcriptional hallmarks of endothelial cell aging via integrated single-cell analysis	I hypothesise that declining angiogenic gene expression in venous endothelial cells contributes to age-related vascular dysfunction.	I hypothesise that declining angiogenic gene expression in venous endothelial cells does not contribute to age-related vascular dysfunction.			8	9	9	5	7	8	8	3	5	1
10.1101/2025.08.14.670043	Distinct and Combined Interferon-ÃƒÆ’Ã…Â½Ãƒâ€šÃ‚Â±/ÃƒÆ’Ã…Â½Ãƒâ€šÃ‚Â²-receptor-1 Loss in Neurons and Astrocytes Disrupt Brain Energy Metabolism and Drive Parkinsonian Dementia	I hypothesise that neuronal IFNAR1 loss drives Parkinsonian dementia-like cognitive deficits in mice.	I hypothesise that neuronal IFNAR1 loss does not drive Parkinsonian dementia-like cognitive deficits in mice.			8	8	5	9	8	8	1	5	5	1
10.1101/2025.08.18.670956	Epilepsy-Associated SCN2A-L1342P Mutation Drives Network Hyperexcitability and Widespread Transcriptomic Changes in Human Cortical Organoids	I hypothesise that SCN2A-L1342P mutation in cortical organoids increases cellular senescence markers.	I hypothesise that SCN2A-L1342P mutation in cortical organoids does not increase cellular senescence markers.			8	1	8	5	9	7	5	5	5	5
10.1101/2025.08.14.670255	Aging of the blood-brain barrier: Metabolic signatures of mouse brain endothelial cell senescence	I hypothesise that increased levels of specific lipid metabolites in brain endothelial cells induce cellular senescence.	I hypothesise that increased levels of specific lipid metabolites in brain endothelial cells do not induce cellular senescence.			7	8	10	7	8	7	8	7	5	1
10.1101/2025.08.13.670216	Senolytic treatment with fisetin reverses age-related endothelial dysfunction partially mediated by SASP factor CXCL12	I hypothesise that reducing CXCL12 levels in aged mice will improve endothelial function.	I hypothesise that reducing CXCL12 levels in aged mice will not improve endothelial function.			8	8	8	5	7	7	8	8	8	1
10.1101/2025.08.17.670762	Human aged astrocytes induce neurotoxicity in response to inflammatory stimuli	I hypothesise that senescent human astrocytes, when exposed to TNF- and IFN-gamma, will exhibit greater neurotoxicity than non-senescent human astrocytes.	I hypothesise that senescent human astrocytes, when exposed to TNF- and IFN-gamma, will exhibit less neurotoxicity than non-senescent human astrocytes.			8	8	8	9	7	7	7	7	5	1
10.1101/2025.08.13.670106	Characterizing Post-Mortem Brain Molecular Taxonomy of Cognitive Resilience and Translating it to Living Humans	I hypothesise that higher expression of genes identified in the high-resilience subtype will correlate with slower cognitive decline in living individuals.	I hypothesise that higher expression of genes identified in the high-resilience subtype will not correlate with slower cognitive decline in living individuals.			8	8	8	7	7	7	8	3	8	1
10.1101/2025.08.17.670749	Age-related decline of synaptic plasticity is regulated by neuro-androgen and neuro-estrogen in normal aging of hippocampus	I hypothesise that supplementing aged rats with testosterone will restore hippocampal dendritic spine density.	I hypothesise that supplementing aged rats with testosterone will not restore hippocampal dendritic spine density.			8	8	8	7	7	7	1	5	8	1
10.1101/2025.08.15.670606	Oxidative stress causes a reversible decrease of deubiquitylases activity in old vertebrate brains	I hypothesise that increasing oxidative stress in aging vertebrate brains directly reduces the catalytic activity of specific cysteine protease DUBs.	I hypothesise that increasing oxidative stress in aging vertebrate brains does not directly reduce the catalytic activity of specific cysteine protease DUBs.			8	8	9	8	7	7	1	5	5	5
10.1101/2025.08.12.669993	Telomere 3'-overhang attrition and persistent telomeric DNA damage response in failing human hearts	I hypothesise that reducing oxidative DNA damage in cardiomyocytes will prevent telomere 3'-overhang attrition in failing human hearts.	I hypothesise that reducing oxidative DNA damage in cardiomyocytes will not prevent telomere 3'-overhang attrition in failing human hearts.			1	5	9	7	9	8	7	5	5	5
10.1101/2025.08.14.670237	Epigenetic markers of middle-age: non-linear DNA methylation changes with aging in humans	I hypothesise that specific CpG sites exhibit an inverse U-shaped DNA methylation pattern peaking in middle age.	I hypothesise that specific CpG sites do not exhibit an inverse U-shaped DNA methylation pattern peaking in middle age.			1	8	9	9	7	9	8	5	5	1
10.1101/2025.08.14.670304	Age-related cognitive decline in house crickets reveals conserved patterns of sensory and learning deficits across the lifespan	I hypothesise that geriatric crickets will exhibit significantly lower olfactory discrimination accuracy than adult crickets.	I hypothesise that geriatric crickets will not exhibit significantly lower olfactory discrimination accuracy than adult crickets.			1	8	7	9	7	5	8	5	5	8
10.1101/2025.08.19.670890	Screening of Cellular Senescence Related Genes as Biomarkers and Therapeutic Targets for Glioblastoma by Integrated Machine Learning	I hypothesise that elevated TGF{beta}I expression in glioblastoma cells is directly associated with increased cellular senescence.	I hypothesise that elevated TGF{beta}I expression in glioblastoma cells is not directly associated with increased cellular senescence.			8	8	10	7	5	8	7	7	5	5
10.1101/2025.08.19.671180	Moderate-Intensity Intermittent Training Inhibits miR-34a-5p to Reduce Prefrontal Cortex Apoptosis and Improve Cognitive Ability in Aging Rats Reduced by D-galactose	I hypothesise that inhibiting miR-34a-5p in aging rat prefrontal cortex reduces apoptosis and improves cognitive function.	I hypothesise that inhibiting miR-34a-5p in aging rat prefrontal cortex does not reduce apoptosis and does not improve cognitive function.			8	9	9	10	7	7	8	5	5	1
10.1101/2025.08.18.670879	REM Sleep Misfires: Intruding Delta Waves Forecast Tau, Amyloid, and Forgetting in Aging	I hypothesise that increased slow NREM-like delta waves during REM sleep in aging individuals correlates with greater amyloid-beta and tau burden.	I hypothesise that increased slow NREM-like delta waves during REM sleep in aging individuals does not correlate with greater amyloid-beta and tau burden.			8	8	8	7	1	9	5	7	5	5
10.1101/2025.08.22.671787	Disease mutations in the N-terminal extension and ÃƒÆ’Ã…Â½Ãƒâ€šÃ‚Â± 2'-helix of dyskerin do not abolish dimerization but disrupt binding to the telomerase RNA	I hypothesise that X-DC mutations in dyskerin's N-terminal extension or ÃƒÆ’Ã…Â½Ãƒâ€šÃ‚Â±2'-helix impair hTR binding by directly disrupting the dyskerin-hTR interface, not by abolishing dyskerin dimerization.	I hypothesise that X-DC mutations in dyskerin's N-terminal extension or ÃƒÆ’Ã…Â½Ãƒâ€šÃ‚Â±2'-helix do not impair hTR binding by directly disrupting the dyskerin-hTR interface, but by preserving dyskerin dimerization.			8	8	7	8	8	8	9	7	9	10
10.1101/2025.08.20.670103	DNA-binding-independent mechanisms of metabolic regulation by the Drosophila FOXO transcription factor	I hypothesise that DNA-binding-independent dFOXO promotes adult body size by regulating specific metabolic genes.	I hypothesise that DNA-binding-independent dFOXO does not promote adult body size by regulating specific metabolic genes.			5	9	8	10	9	7	8	1	8	5
10.1101/2025.08.18.670854	Drosophila Pyruvate Kinase Links Metabolic State with Circadian Output via TARANIS and PDF	I hypothesise Pyruvate kinase knockdown in Drosophila clock cells shortens circadian period by reducing Pigment-dispersing factor protein levels.	I hypothesise that Pyruvate kinase knockdown in Drosophila clock cells does not shorten circadian period by reducing Pigment-dispersing factor protein levels.			5	8	8	7	7	9	8	1	5	1
10.1101/2025.08.15.670582	The neuropeptide neuromedin U receptor nmur-1 buffers insulin receptor signaling in bacteria-dependent C. elegans survival	I hypothesise that nmur-1 activation reduces C. elegans pharyngeal swelling on OP50 bacteria by modulating DAF-2 signaling.	I hypothesise that nmur-1 activation does not reduce C. elegans pharyngeal swelling on OP50 bacteria by modulating DAF-2 signaling.			5	8	7	8	9	7	8	10	5	1
10.1101/2025.08.15.670322	Age-related differences in the cortical motor network during uni-manual and bimanual coordination - an EEG study	I hypothesise that increased alpha power in the bilateral precuneus in older adults directly correlates with reduced visuomotor integration quality during unimanual tasks.	I hypothesise that increased alpha power in the bilateral precuneus in older adults does not directly correlate with reduced visuomotor integration quality during unimanual tasks.			1	10	5	7	8	7	5	5	5	5
10.1101/2025.08.20.671306	Dysferlin Regulates Cardiac T-tubule Structure and Excitation-contraction Coupling in Isolated Cardiac Myocytes at Rest and in Response to Acute Hypo-osmotic Stress and is Protective Against Arrhythmias in Langendorff-perfused Hearts	I hypothesise that reduced dysferlin abundance in aged hearts directly causes T-tubule fragmentation and impaired calcium handling.	I hypothesise that reduced dysferlin abundance in aged hearts does not directly cause T-tubule fragmentation and impaired calcium handling.			7	8	8	7	7	7	8	5	5	1
10.1101/2025.08.19.671184	Sex-specific non-linear DNA methylation trajectories across aging predict cancer risk and systemic inflammation	I hypothesise that a female-specific non-linear DNA methylation trajectory is predictive of future cancer onset.	I hypothesise that a female-specific non-linear DNA methylation trajectory is not predictive of future cancer onset.			9	9	8	10	7	9	7	5	5	5
10.1101/2025.08.15.669078	White matter microstructure changes across the lifespan: a meta-analysis of longitudinal diffusion MRI studies	I hypothesise that individuals aged 36-50 will exhibit a statistically significant decline in fractional anisotropy (FA) compared to individuals aged 20-35.	I hypothesise that individuals aged 36-50 will not exhibit a statistically significant decline in fractional anisotropy (FA) compared to individuals aged 20-35.			5	5	9	7	7	8	7	5	5	5
10.1101/2025.08.18.670970	White Matter Tract Vulnerability to Amyloid Pathology on the Alzheimer's Disease Continuum	I hypothesise amyloid positivity is associated with reduced white matter integrity in specific tracts.	I hypothesise that amyloid positivity is not associated with reduced white matter integrity in specific tracts.			8	8	8	7	7	8	9	5	8	5
10.1101/2025.08.19.669949	Deterministic versus Probabilistic Tractography: Impact on White Matter Bundle Shape	I hypothesise probabilistic tractography yields higher inter-subject shape similarity for the arcuate fasciculus than deterministic tractography.	I hypothesise that probabilistic tractography yields lower inter-subject shape similarity for the arcuate fasciculus than deterministic tractography.			1	1	9	9	9	7	9	5	8	5
10.1101/2025.08.14.669896	Proteo-transcriptomic reprogramming and resource reallocation define the aging mammalian brain	I hypothesise that decreased mitochondrial complex I protein levels in aging mouse brains are not compensated by increased mRNA expression.	I hypothesise that decreased mitochondrial complex I protein levels in aging mouse brains are compensated by increased mRNA expression.			5	5	8	8	9	7	5	9	1	5
10.1101/2025.08.25.672139	CDK4/6 inhibition induces a DNA damage-independent senescence-associated secretory phenotype driven by delayed activation of NF-ÃƒÆ’Ã…Â½Ãƒâ€šÃ‚ÂºB	I hypothesise that CDK4/6 inhibition induces a DNA damage-independent SASP via delayed NF-ÃƒÆ’Ã…Â½Ãƒâ€šÃ‚ÂºB activation.	I hypothesise that CDK4/6 inhibition does not induce a DNA damage-independent SASP via delayed NF-ÃŽÂºB activation.			8	8	8	8	8	8	5	8	5	1
10.1101/2025.08.24.671874	Covalent Inhibition of the Human Papillomavirus Type 16 E6 Protein Restores p53 and Suppresses HPV-Driven Tumorigenesis	I hypothesise that covalent inhibition of HPV16 E6 Cys-51 restores p53 levels in HPV16-positive cancer cells.	I hypothesise that covalent inhibition of HPV16 E6 Cys-51 does not restore p53 levels in HPV16-positive cancer cells.			5	8	1	9	7	7	8	5	1	1
10.1101/2025.08.25.671822	The gerotherapeutic drugs rapamycin, acarbose, and phenylbutyrate extend lifespan and enhance healthy aging in house crickets.	I hypothesise that intermittent acarbose treatment in female crickets will reduce lifespan compared to controls.	I hypothesise that intermittent acarbose treatment in female crickets will not reduce lifespan compared to controls.			9	8	8	5	8	8	5	7	1	8
10.1101/2025.08.22.671845	Lipid-laden endothelial cells exhibit a transcriptomic signature linked to blood-brain barrier dysfunction, metabolic reprogramming and increased inflammation in the aging brain	I hypothesise that reducing lipid droplet accumulation in brain endothelial cells will improve blood-brain barrier integrity in aged mice.	I hypothesise that reducing lipid droplet accumulation in brain endothelial cells will not improve blood-brain barrier integrity in aged mice.			8	8	9	7	8	7	8	2	8	1
10.1101/2025.08.25.671156	Epigenetic signature of heterogeneity in aging: Findings from the Canadian Longitudinal Study on Aging	I hypothesise that increased DNA methylation variability in immune-related genes predicts accelerated functional decline in older adults.	I hypothesise that increased DNA methylation variability in immune-related genes does not predict accelerated functional decline in older adults.			8	9	9	9	8	7	7	5	5	5
10.1101/2025.08.22.671763	Age-related changes in behavioral and neural variability in a decision-making task	I hypothesise that increased Fano Factor in visual cortex neurons of older mice predicts longer response times in a decision-making task.	I hypothesise that increased Fano Factor in visual cortex neurons of older mice does not predict longer response times in a decision-making task.			8	8	8	7	7	9	8	5	7	5
10.1101/2025.08.26.672407	Aperiodic and Periodic EEG Component Lifespan Trajectories: Monotonic Decrease versus Growth-then-Decline	I hypothesise that a monotonic decrease in aperiodic EEG activity with age is directly correlated with increased DNA methylation levels.	I hypothesise that a monotonic decrease in aperiodic EEG activity with age is not directly correlated with increased DNA methylation levels.			8	5	8	5	8	7	7	5	5	5
10.1101/2025.08.21.671401	ComBat-Predict enhances generalizability of neuroimaging models to new sites	I hypothesise ComBat-Predict reduces site-related bias in neuroimaging measures of brain aging.	I hypothesise that ComBat-Predict does not reduce site-related bias in neuroimaging measures of brain aging.			1	10	8	1	9	9	8	7	8	1
10.1101/2025.08.21.671607	Investigating Neural Correlates of Emotional Regulation as a Function of Age, Race, and Socioeconomic Status	I hypothesise that lower socioeconomic status in older adults is associated with increased amygdala activation during emotional regulation tasks.	I hypothesise that lower socioeconomic status in older adults is not associated with increased amygdala activation during emotional regulation tasks.			8	8	7	7	7	7	7	8	7	1
10.1101/2025.08.24.671962	"Genome Stability under Silence: DNA Repair Networks in Quiescent Fission Yeast"	I hypothesise that loss of BER pathway components in quiescent fission yeast increases C:G > T:A mutations.	I hypothesise that loss of BER pathway components in quiescent fission yeast does not increase C:G > T:A mutations.			1	8	9	7	7	9	7	10	5	1
10.1101/2025.08.21.671433	Systemic drivers and molecular mechanisms of sarcopenia in aetiology-specific end-stage liver disease	I hypothesise that elevated IL-1 in ESLD plasma directly induces cellular senescence in human myotubes, leading to reduced muscle mass.	I hypothesise that elevated IL-1 in ESLD plasma does not directly induce cellular senescence in human myotubes, leading to preserved muscle mass.			5	5	8	7	8	7	5	5	5	5
10.1101/2025.08.22.671756	Structural basis of Drosophila insulin receptor activation by DILP2 hormone	I hypothesise that DILP2 binding to dmIR induces asymmetric receptor conformations, impacting downstream signalling.	I hypothesise that DILP2 binding to dmIR does not induce asymmetric receptor conformations, not impacting downstream signalling.			8	8	1	7	7	7	8	9	8	1
10.1101/2025.08.18.670856	Nuclear Fetuin-A Drives Adipocyte Senescence via HIF-1 ÃƒÆ’Ã…Â½Ãƒâ€šÃ‚Â± During Obesity	I hypothesise that inhibiting nuclear Fetuin-A translocation will reduce adipocyte senescence in obese individuals.	I hypothesise that inhibiting nuclear Fetuin-A translocation will not reduce adipocyte senescence in obese individuals.			8	8	8	5	7	7	5	5	5	1
10.1101/2025.08.20.671049	Reserpine prolongs lifespan but compromises heat-stress resilience in Drosophila melanogaster	I hypothesise that reserpine treatment in Drosophila melanogaster impairs heat shock protein induction under heat stress.	I hypothesise that reserpine treatment in Drosophila melanogaster does not impair heat shock protein induction under heat stress.			8	8	8	9	9	7	9	8	5	9
10.1101/2025.08.28.672880	Ly6d expression delineates two putative postnatal thymus epithelial progenitor cells that are differentially affected by ageing	I hypothesise Ly6d-negative TEPCs are preferentially depleted by ageing compared to Ly6d-positive TEPCs.	I hypothesise that Ly6d-negative TEPCs are not preferentially depleted by ageing compared to Ly6d-positive TEPCs.			1	1	8	5	8	9	7	5	8	5
10.1101/2025.08.28.672503	Separating error from bias: A new framework for facial age estimation in humans and AIs	I hypothesise that removing response bias from facial age estimation will reveal greater accuracy in AI compared to human estimation.	I hypothesise that removing response bias from facial age estimation will not reveal greater accuracy in AI compared to human estimation.			8	5	8	8	8	8	8	5	8	5
10.1101/2025.08.27.672747	Molecularly defined auditory neuron subtypes show different vulnerabilities to noise- and age-related synaptopathy in mice	I hypothesise that Ia SGNs are more resistant to age-related synaptopathy than Ib/Ic SGNs in mice.	I hypothesise that Ia SGNs are less resistant to age-related synaptopathy than Ib/Ic SGNs in mice.			8	8	7	7	7	9	8	8	7	7
10.1101/2025.08.29.672869	Differences in LC integrity and fMRI activations in healthy aging and MCI associated with successful memory encoding	I hypothesise reduced locus coeruleus (LC) integrity is associated with impaired memory encoding in mild cognitive impairment (MCI).	I hypothesise that reduced locus coeruleus (LC) integrity is not associated with impaired memory encoding in mild cognitive impairment (MCI).			1	1	7	5	7	8	8	6	7	8
10.1101/2025.08.28.672283	TP53 mutations drive therapy resistance via post-mitochondrial caspase blockade	I hypothesise TP53 mutant AML cells exhibit impaired caspase-3/7 activation after venetoclax plus azacitidine treatment.	I hypothesise that TP53 mutant AML cells do not exhibit impaired caspase-3/7 activation after venetoclax plus azacitidine treatment.			8	9	9	9	8	8	7	7	5	5
10.1101/2025.08.26.672425	Molecular determinants of brain-resident CD8+ T cell formation and function	I hypothesise that TCF-1 is required for the formation of brain CD8+ Trm cells in aged mice.	I hypothesise that TCF-1 is not required for the formation of brain CD8+ Trm cells in aged mice.			7	8	6	7	9	7	8	1	5	1
10.1101/2025.08.27.672709	Senolytic-Resistant Senescent Cells Have a Distinct SASP Profile and Functional Impact: The Path to Developing Senosensitizers	I hypothesise senolytic-resistant senescent cells exhibit lower pro-inflammatory SASP factor secretion than senolytic-sensitive senescent cells.	I hypothesise that senolytic-resistant senescent cells exhibit higher pro-inflammatory SASP factor secretion than senolytic-sensitive senescent cells.			10	5	8	8	7	7	2	7	5	5
10.1101/2025.08.27.672736	Sister chromatid separation determines the proliferative characteristics upon whole-genome duplication through homologous chromosome rearrangement	I hypothesise that impaired sister chromatid separation after whole-genome duplication reduces cellular viability in aging tissues.	I hypothesise that impaired sister chromatid separation after whole-genome duplication does not reduce cellular viability in aging tissues.			7	8	8	7	7	8	7	5	5	1
10.1101/2025.08.29.672996	Fins as a reliable surrogate tissue for age-related changes of telomeres and DNA methylation in gonads of a short-lived fish	I hypothesise that telomere length in turquoise killifish fins decreases with age, mirroring gonadal telomere length decline.	I hypothesise that telomere length in turquoise killifish fins does not decrease with age, contradicting gonadal telomere length decline.			5	9	10	8	7	7	8	8	5	8
10.1101/2025.08.27.672359	Molecular aging is the main driver of Parkinson's Disease	I hypothesise that attenuating CDC42 activity in aged mice with alpha-synuclein oligomers will improve motor function without reducing oligomer levels.	I hypothesise that attenuating CDC42 activity in aged mice with alpha-synuclein oligomers will not improve motor function and will reduce oligomer levels.			8	5	8	7	7	7	5	5	5	1
10.1101/2025.08.26.672151	Mitochondrial G4 DNA Cleavage by EndoG Activates a Flexible, Stress-Dependent Repair Response via Double strand break repair pathways	I hypothesise that inhibiting EndoG cleavage of mitochondrial G4 DNA reduces mtDNA deletions in aged cells.	I hypothesise that inhibiting EndoG cleavage of mitochondrial G4 DNA does not reduce mtDNA deletions in aged cells.			8	5	7	10	7	7	8	10	5	1
10.1101/2025.09.03.673973	In Silico Design of APOE ÃƒÆ’Ã…Â½Ãƒâ€šÃ‚Âµ4 Interaction Inhibitor Peptides for Alzheimer's Disease	I hypothesise that APOE ÃƒÆ’Ã…Â½Ãƒâ€šÃ‚Âµ4 interaction inhibitor peptides will reduce amyloid precursor protein aggregation in vitro.	I hypothesise that APOE ÃƒÆ’Ã…Â½Ãƒâ€šÃ‚Âµ4 interaction inhibitor peptides will not reduce amyloid precursor protein aggregation in vitro.			8	8	7	7	8	9	8	5	7	1
10.1101/2025.03.24.644876	Integrative Machine Learning and Bioinformatics Analysis to Identify Cellular Senescence-Related Genes and Potential Therapeutic Targets in Ulcerative Colitis and Colorectal Cancer	I hypothesise that ABCB1, CXCL1, TACC3, TGFBI, and VDR are significantly upregulated in senescent cells from UC and CRC tissues.	I hypothesise that ABCB1, CXCL1, TACC3, TGFBI, and VDR are not significantly upregulated in senescent cells from UC and CRC tissues.			8	8	7	6	7	8	8	3	5	1
10.1101/2025.02.28.640792	Integrating genomic, transcriptomic and epigenetic data to identify phenotypically impactful driver pathways in glioblastoma	I hypothesise that TP53 mutations in glioblastoma lead to increased VEGFA expression via MIR-185.	I hypothesise that TP53 mutations in glioblastoma do not lead to increased VEGFA expression via MIR-185.			5	8	8	7	9	8	10	5	5	1
10.1101/2025.09.03.673915	Tartrate-resistant acid phosphatase (TRAP/ACP5) sex-specifically regulates bone maintenance in old mice, but the anabolic effects of mechanical loading is regulated in a sex-independent way	I hypothesise TRAP deficiency in old male mice impairs bone remodelling, leading to increased trabecular bone volume fraction.	I hypothesise that TRAP deficiency in old male mice does not impair bone remodelling, leading to decreased trabecular bone volume fraction.			1	5	8	7	9	7	8	7	8	1
10.1101/2025.09.02.673861	Ischemic stroke increases levels of the folate receptor and one-carbon enzymes in male and female brain tissue	I hypothesise that increased folate receptor levels in stroke-affected neurons are directly caused by ischemic injury.	I hypothesise that increased folate receptor levels in stroke-affected neurons are not directly caused by ischemic injury.			8	8	8	5	9	8	8	4	5	1
10.1101/2025.09.02.673860	Neuroinflammation links the neurogenic and neurodegenerative phenotypes of Nrmt1-/- mice	I hypothesise that Nrmt1 deficiency causes premature neuronal differentiation and apoptosis in Nrmt1-/- mice.	I hypothesise that Nrmt1 deficiency does not cause premature neuronal differentiation and apoptosis in Nrmt1-/- mice.			8	8	7	4	8	5	9	1	5	1
10.1101/2025.09.01.673389	An Inflammatory and Quiescent HSC Subpopulation Expands with Age in Humans	I hypothesise that inhibiting TNF/NFÃƒÆ’Ã…Â½Ãƒâ€šÃ‚ÂºB signaling in aged human HSCs will reduce their inflammatory gene expression program.	I hypothesise that inhibiting TNF/NFÃŽÂºB signaling in aged human HSCs will not reduce their inflammatory gene expression program.			8	8	8	7	8	7	9	10	5	1
10.1101/2025.09.02.670249	Structural Compression and Entorhinal Vulnerability: Linking Tentorial Adjacency to Tau Burden and Dementia Progression	I hypothesise that increased entorhinal-tentorial adjacency predicts accelerated tau accumulation in the entorhinal cortex in aging individuals.	I hypothesise that increased entorhinal-tentorial adjacency does not predict accelerated tau accumulation in the entorhinal cortex in aging individuals.			8	8	8	7	8	7	8	7	7	5
10.1101/2025.08.30.673265	InsP3R signaling mediates mitochondrial stress-induced longevity through actomyosin-dependent mitochondrial dynamics	I hypothesise that inhibiting InsP3R signaling will shorten lifespan in C. elegans with mitochondrial Complex I mutations.	I hypothesise that inhibiting InsP3R signaling will not shorten lifespan in C. elegans with mitochondrial Complex I mutations.			8	9	8	7	8	7	5	5	1	1
10.1101/2025.08.29.673190	Natural killer cell TGF- signaling regulates senolytic activity and vascular patterning in the postnatal lung	I hypothesise that TGF-beta signaling in NK cells promotes senescent cell clearance in the postnatal lung.	I hypothesise that TGF-beta signaling in NK cells does not promote senescent cell clearance in the postnatal lung.			8	8	9	8	7	8	8	1	8	5
10.1101/2025.09.01.673520	Calorie Restriction modulates beta cell IP3R activity to regulate Ca2+ homeostasis and cell network connectivity	I hypothesise that calorie restriction reduces beta cell insulin secretion by decreasing IP3R-driven Ca2+ oscillations.	I hypothesise that calorie restriction does not reduce beta cell insulin secretion by decreasing IP3R-driven Ca2+ oscillations.			5	8	7	7	7	7	5	5	1	10
10.1101/2025.09.01.673564	Hormetic nutrient stress promotes longevity by orchestrating histone acetylation on key lipid catabolism and antioxidant defense genes	I hypothesise that increasing H3K27ac levels in C. elegans will extend lifespan independently of hormetic fasting.	I hypothesise that increasing H3K27ac levels in C. elegans will not extend lifespan independently of hormetic fasting.			5	8	8	8	8	7	7	5	7	1
10.1101/2025.09.02.673812	Genetic regulation of fasting-induced longevity effects	I hypothesise that specific genetic variants in Collaborative Cross strains mediate differential lifespan extension in response to intermittent fasting.	I hypothesise that specific genetic variants in Collaborative Cross strains do not mediate differential lifespan extension in response to intermittent fasting.			8	5	8	10	5	7	8	5	5	1
10.1101/2025.08.28.672902	The influence of power-training and aging on endomysium content and fiber cross-sectional area in the human soleus muscle	I hypothesise that power-training increases soleus muscle fiber cross-sectional area in young individuals.	I hypothesise that power-training does not increase soleus muscle fiber cross-sectional area in young individuals.			5	8	8	7	7	7	8	1	8	1
10.1101/2025.09.02.673772	Overexpression of Ssd1 and calorie restriction extend yeast replicative lifespan by preventing deleterious age-dependent iron uptake	I hypothesise that Ssd1 overexpression prevents age-dependent iron uptake by inhibiting Aft1 nuclear translocation.	I hypothesise that Ssd1 overexpression does not prevent age-dependent iron uptake and does not inhibit Aft1 nuclear translocation.			5	8	8	7	1	8	8	5	1	1
10.1101/2025.02.01.636070	Centella asiatica improves sleep quality and quantity in aged mice	I hypothesise that Centella asiatica water extract administration will increase REM sleep duration in aged male mice.	I hypothesise that Centella asiatica water extract administration will not increase REM sleep duration in aged male mice.			7	8	9	5	7	7	8	5	5	1
10.1101/2025.09.02.673724	Questioning the utility of oxidative stress measurements as biomarkers of physiological condition and fitness	I hypothesise that low individual repeatability of oxidative stress markers limits their utility as biomarkers for predicting telomere length.	I hypothesise that high individual repeatability of oxidative stress markers enhances their utility as biomarkers for predicting telomere length.			9	9	7	1	9	7	3	9	5	7
10.1101/2025.08.31.673391	Interferon gamma signaling drives cardiac metabolic rewiring	I hypothesise that elevated IFN-gamma signaling in cardiomyocytes reduces mitochondrial oxidative phosphorylation.	I hypothesise that elevated IFN-gamma signaling in cardiomyocytes does not reduce mitochondrial oxidative phosphorylation.			1	5	8	8	1	9	8	7	5	1
10.1101/2025.09.02.673859	Heterochronic myeloid cell replacement reveals the local brain environment as key driver of microglia aging	I hypothesise that STAT1 signaling in microglia is necessary for the acquisition of aging phenotypes in the aged brain.	I hypothesise that STAT1 signaling in microglia is not necessary for the acquisition of aging phenotypes in the aged brain.			8	8	7	8	7	8	9	7	5	5
10.1101/2025.09.02.673642	Preserved synaptic architecture but impaired ketamine-induced synaptic plasticity of layer 5 pyramidal neurons in the aged frontal cortex	I hypothesise that ketamine-induced spinogenesis impairment in aged frontal cortex neurons causes reduced cognitive flexibility.	I hypothesise that ketamine-induced spinogenesis enhancement in aged frontal cortex neurons does not cause reduced cognitive flexibility.			8	8	8	7	8	7	8	7	5	5
10.1101/2025.09.05.674552	Peripheral inflammation mediates midbrain Lrrk2 kinase activity via Rab32 expression	I hypothesise that peripheral inflammation directly increases LRRK2 kinase activity in midbrain microglia via Rab32 upregulation.	I hypothesise that peripheral inflammation does not directly increase LRRK2 kinase activity in midbrain microglia via Rab32 upregulation.			10	5	8	7	9	7	8	5	5	5
10.1101/2025.09.03.673074	Partial Bypass of Frataxin Deficiency by ISCU M141I Restores Cytosolic and Nuclear FeS Cluster Assembly	I hypothesise that ISCU M141I expression in FXN-deficient mammalian cells restores mitochondrial Fe-S cluster protein function.	I hypothesise that ISCU M141I expression in FXN-deficient mammalian cells does not restore mitochondrial Fe-S cluster protein function.			8	8	1	8	7	8	5	1	10	1
10.1101/2025.09.04.674084	Lifespan and fecundity impacts of reduced insulin signalling can be directed by mito-nuclear epistasis in Drosophila	I hypothesise that specific combinations of mitochondrial and nuclear DNA variants modulate the lifespan extension effects of reduced insulin signalling in Drosophila.	I hypothesise that specific combinations of mitochondrial and nuclear DNA variants do not modulate the lifespan extension effects of reduced insulin signalling in Drosophila.			8	8	8	8	8	9	8	10	5	5
10.1101/2025.09.05.673478	Mitochondrial proteostatic stress disrupts mitoribosome biogenesis and translation	I hypothesise that mitochondrial proteostatic stress impairs mitoribosome biogenesis by causing aggregation of mitoribosome subunits.	I hypothesise that mitochondrial proteostatic stress does not impair mitoribosome biogenesis by causing aggregation of mitoribosome subunits.			8	8	8	5	9	7	8	5	5	8
10.1101/2025.09.02.673815	Knockout of Perilipin 2 in Microglia Alters Lipid Droplet Accumulation and Response to Alzheimer's Disease Stimuli	I hypothesise that Plin2 knockout in microglia reduces lipid droplet accumulation under basal conditions.	I hypothesise that Plin2 knockout in microglia does not reduce lipid droplet accumulation under basal conditions.			8	8	9	7	9	7	8	9	8	1
10.1101/2025.09.03.674110	Memorability of Images Positively Influences Associative Memory Retention	I hypothesise that highly memorable images improve associative memory retention in older adults more than in younger adults.	I hypothesise that highly memorable images do not improve associative memory retention in older adults more than in younger adults.			1	10	7	7	7	8	8	5	8	5
10.1101/2025.09.04.674248	Age-Related Changes in Curiosity: The Influence of Locus Coeruleus on Information-Seeking Behavior	I hypothesise that reduced locus coeruleus integrity in older adults directly correlates with decreased prediction error-driven information-seeking.	I hypothesise that reduced locus coeruleus integrity in older adults does not directly correlate with decreased prediction error-driven information-seeking.			8	8	8	8	7	8	8	5	5	5
10.1101/2025.09.01.673460	Task Complexity and Limb Dominance Modulate the Effects of Ageing on Neuromuscular Function	I hypothesise older adults exhibit greater force steadiness variability in their non-dominant vastus lateralis compared to younger adults.	I hypothesise that older adults do not exhibit greater force steadiness variability in their non-dominant vastus lateralis compared to younger adults.			5	1	5	7	9	7	8	9	5	1
10.1101/2025.08.31.673254	Lifelong restriction of dietary valine has sex-specific benefits for health and lifespan in mice	I hypothesise lifelong valine restriction extends male mouse lifespan by downregulating PI3K-Akt signaling.	I hypothesise that lifelong valine restriction does not extend male mouse lifespan by downregulating PI3K-Akt signaling.			8	9	9	7	8	9	7	5	5	1
10.1101/2025.08.31.673349	A benchmark of the somatic mutation landscape using single-cell and single-molecule whole-genome sequencing	I hypothesise that Nanopore sequencing (NS) overestimates somatic mutation rates in IMR-90 fibroblasts compared to in vivo estimates due to replication stress.	I hypothesise that Nanopore sequencing (NS) underestimates somatic mutation rates in IMR-90 fibroblasts compared to in vivo estimates due to replication stress.			1	1	9	8	9	7	5	5	5	5
10.1101/326751	DAF-16/Foxo suppresses the transgenerational sterility of prg-1 piRNA mutants via a systemic small RNA pathway	I hypothesise that DAF-16 activation in somatic cells directly upregulates SID-1 to facilitate systemic small RNA transport to germ cells.	I hypothesise that DAF-16 activation in somatic cells does not directly upregulate SID-1 to facilitate systemic small RNA transport to germ cells.			8	9	8	7	8	7	5	1	5	5
10.1101/2025.03.24.644848	Targeted intervention of senescence induced by a 5' half fragment of tRNASec(NCA) with antisense oligonucleotide extends healthspan and lifespan in mice	I hypothesise that inhibiting 5'-tRNASec(NCA) half accumulation extends mouse healthspan.	I hypothesise that inhibiting 5'-tRNASec(NCA) half accumulation does not extend mouse healthspan.			5	1	8	5	7	5	7	5	5	5
10.1101/2025.04.01.646442	Integration of Alzheimer's GWAS, 3D genomics, and single-cell CRISPRi non-coding screen implicates causal variants in a microglial enhancer regulating TSPAN14.	I hypothesise that reducing TSPAN14 expression in microglia decreases IL-6 and IL-8 secretion.	I hypothesise that reducing TSPAN14 expression in microglia increases IL-6 and IL-8 secretion.			8	8	8	1	8	8	2	8	5	5
10.1101/2025.04.01.646733	Non-linear Age-related Change in Human Interleukin-11 and the receptor subunit alpha DNA Methylation	I hypothesise that increased IL-11 gene DNA methylation in middle age leads to higher IL-11 protein expression.	I hypothesise that increased IL-11 gene DNA methylation in middle age does not lead to higher IL-11 protein expression.			5	5	7	7	9	8	3	7	5	1
10.1101/2025.04.14.648802	Resilience and restoration from fasting-refeeding mediated by a nutrient-regulated linker histone	I hypothesise that reducing HIL-1/H1.0 expression during refeeding in C. elegans improves restoration from fasting.	I hypothesise that reducing HIL-1/H1.0 expression during refeeding in C. elegans does not improve restoration from fasting.			1	8	8	7	8	8	8	5	5	1
10.1101/2025.04.14.647528	Establishing Comprehensive Transthoracic Echocardiography Reference Ranges for Mouse Models: Insights into the Impact of Anesthesia, Sex, and Age	I hypothesise that anesthesia significantly alters specific echocardiographic parameters of cardiac function in mice.	I hypothesise that anesthesia does not significantly alter specific echocardiographic parameters of cardiac function in mice.			7	5	9	8	1	5	8	9	5	8
10.1101/2025.04.17.649454	A novel inducible mtDNA mutator mouse model to study mitochondrial dysfunction with temporal and spatial control	I hypothesise that inducible mtDNA mutations in specific tissues will accelerate aging phenotypes in mice.	I hypothesise that inducible mtDNA mutations in specific tissues will not accelerate aging phenotypes in mice.			7	8	8	7	7	8	8	5	5	1
10.1101/2025.08.30.673239	Reprogramming Factors Activate a Non-Canonical Oxidative Resilience Pathway That Can Rejuvenate RPEs and Restore Vision	I hypothesise that increasing GSTA4 expression in aged RPE cells will reduce 4-HNE accumulation and improve mitochondrial function.	I hypothesise that increasing GSTA4 expression in aged RPE cells will not reduce 4-HNE accumulation and will not improve mitochondrial function.			7	10	8	5	8	9	1	5	7	1
10.1101/2025.02.25.639746	Endogenously generated Dutch-type AÃƒÆ’Ã…Â½Ãƒâ€šÃ‚Â² nonfibrillar aggregates dysregulate presynaptic neurotransmission in the absence of detectable inflammation	I hypothesise that nonfibrillar AÃƒÆ’Ã…Â½Ãƒâ€šÃ‚Â² aggregates in APPE693Q mice impair synaptic vesicle replenishment independently of inflammation.	I hypothesise that nonfibrillar AÃŽÂ² aggregates in APPE693Q mice do not impair synaptic vesicle replenishment independently of inflammation.			8	10	8	7	7	7	10	7	5	10
10.1101/2024.04.19.590241	The energetic stress cytokine GDF15 is elevated in the context of chronic and acute psychosocial stress	I hypothesise that acute social-evaluative stress increases plasma GDF15 levels within minutes.	I hypothesise that acute social-evaluative stress does not increase plasma GDF15 levels within minutes.			5	8	9	7	8	7	8	1	5	1
[truncated: 1,873 more rows]
