# Supplementary material
Source: Research Square preprint supplement (doi:10.21203/rs.3.rs-9060414/v1)
Supplement: Supplementary file 14 [file df648fbf7175efc72c6dc7b0.xlsx]

## Sheet: Supp_Table_8
Frontend packages	Backend and Training packages
altair==5.5.0	aiosmtplib==3.0.2
annotated-types==0.7.0	alembic==1.15.2
anyio==4.9.0	annotated-types==0.7.0
attrs==25.3.0	anthropic==0.66.0
bcrypt==4.3.0	anyio==4.9.0
blinker==1.9.0	async-timeout==5.0.1
cachetools==5.5.2	bcrypt==4.3.0
captcha==0.7.1	blinker==1.9.0
certifi==2025.4.26	cachetools==5.5.2
cffi==1.17.1	certifi==2025.4.26
charset-normalizer==3.4.2	cffi==1.17.1
click==8.2.1	cfgv==3.4.0
cryptography==45.0.5	charset-normalizer==3.4.2
dill==0.3.8	class-resolver==0.6.0
distro==1.9.0	click==8.2.0
extra-streamlit-components==0.1.80	click-default-group==1.2.4
fastapi==0.115.14	colorama==0.4.6
gitdb==4.0.12	colorlog==6.9.0
GitPython==3.1.44	cryptography==44.0.3
google-ai-generativelanguage==0.6.15	dataclasses-json==0.6.7
google-api-core==2.25.0	dgl==1.1.2
google-api-python-client==2.171.0	dglke==0.1.0.dev0
google-auth==2.40.3	distlib==0.3.9
google-auth-httplib2==0.2.0	distro==1.9.0
google-generativeai==0.8.5	dnspython==2.7.0
googleapis-common-protos==1.70.0	docdata==0.0.5
greenlet==3.2.4	ecdsa==0.19.1
grpcio==1.72.1	email_validator==2.2.0
grpcio-status==1.71.0	fastapi==0.110.3
h11==0.16.0	fastapi-limiter==0.1.6
httpcore==1.0.9	fastapi-mail==1.4.2
httplib2==0.22.0	filelock==3.18.0
httpx==0.28.1	fsspec==2025.3.2
idna==3.10	google-ai-generativelanguage==0.6.15
importlib-metadata==4.13.0	google-api-core==2.25.1
Jinja2==3.1.6	google-api-python-client==2.181.0
jiter==0.10.0	google-auth==2.40.3
jsonschema==4.24.0	google-auth-httplib2==0.2.0
jsonschema-specifications==2025.4.1	google-generativeai==0.8.5
kani==1.4.3	googleapis-common-protos==1.70.0
kani-utils @ git+https://github.com/oneilsh/kani-utils.git@b9a8d3d86516160d14d211b644fcbbb6068eef52	greenlet==3.2.2
MarkupSafe==3.0.2	grpcio==1.74.0
multidict==6.7.0	grpcio-status==1.71.2
narwhals==1.41.0	gunicorn==23.0.0
neo4j==5.28.1	h11==0.16.0
nest-asyncio==1.6.0	httpcore==1.0.9
numpy==2.2.6	httplib2==0.30.0
openai==1.84.0	httpx==0.28.1
packaging==24.2	identify==2.6.10
pandas==2.3.0	idna==3.10
pandasql==0.7.3	Jinja2==3.1.6
pdfminer.six==20221105	jiter==0.9.0
pdfplumber==0.10.4	joblib==1.5.0
pillow==11.2.1	littleutils==0.2.2
proto-plus==1.26.1	Mako==1.3.10
protobuf==5.29.5	MarkupSafe==3.0.2
pyarrow==20.0.0	marshmallow==3.26.1
pyasn1==0.6.1	more-click==0.1.2
pyasn1_modules==0.4.2	more-itertools==10.7.0
pycparser==2.22	mpmath==1.3.0
pydantic==2.11.5	mypy_extensions==1.1.0
pydantic_core==2.33.2	neo4j==5.28.1
pydeck==0.9.1	networkx==3.4.2
PyJWT==2.10.1	nodeenv==1.9.1
pyparsing==3.2.3	numpy==2.2.5
pypdfium2==5.0.0	nvidia-cublas-cu12==12.1.3.1
python-dateutil==2.9.0.post0	nvidia-cuda-cupti-cu12==12.1.105
python-dotenv==1.1.0	nvidia-cuda-nvrtc-cu12==12.1.105
pytz==2025.2	nvidia-cuda-runtime-cu12==12.1.105
PyYAML==6.0.2	nvidia-cudnn-cu12==9.1.0.70
redis==5.3.1	nvidia-cufft-cu12==11.0.2.54
referencing==0.36.2	nvidia-curand-cu12==10.3.2.106
regex==2025.10.23	nvidia-cusolver-cu12==11.4.5.107
requests==2.32.3	nvidia-cusparse-cu12==12.1.0.106
rpds-py==0.25.1	nvidia-nccl-cu12==2.21.5
rsa==4.9.1	nvidia-nvjitlink-cu12==12.9.86
six==1.17.0	nvidia-nvtx-cu12==12.1.105
smmap==5.0.2	ogb==1.3.6
sniffio==1.3.1	openai==1.79.0
SQLAlchemy==2.0.44	optuna==4.3.0
starlette==0.46.2	outdated==0.2.2
streamlit==1.48.0	packaging==25.0
streamlit-authenticator==0.2.1	pandas==2.2.3
tabulate==0.9.0	passlib==1.7.4
tenacity==9.1.2	Pillow==9.5.0
tiktoken==0.12.0	platformdirs==4.3.8
toml==0.10.2	pre-commit==3.8.0
tornado==6.5.1	proto-plus==1.26.1
tqdm==4.67.1	protobuf==5.29.5
typing-inspection==0.4.1	psutil==7.0.0
typing_extensions==4.14.0	pyasn1_modules
tzdata==2025.2	pycparser==2.22
upstash-redis==1.5.0	pydantic==2.11.4
uritemplate==4.2.0	pydantic-settings==2.9.1
urllib3==2.4.0	pydantic_core==2.33.2
uvicorn==0.35.0	pykeen==1.11.1
watchdog==6.0.0	pyparsing==3.2.3
zipp==3.23.0	pystow==0.7.0
	python-dateutil==2.9.0.post0
	python-dotenv==1.1.0
	python-jose
	python-multipart==0.0.9
	pytz==2025.2
	PyYAML==6.0.2
	redis==6.1.0
	reportlab==4.4.3
	requests==2.32.3
	rsa==4.9.1
	ruff==0.3.7
	scikit-learn==1.6.1
	scipy==1.15.3
	six==1.17.0
	sniffio==1.3.1
	SQLAlchemy==2.0.41
	starlette==0.37.2
	sympy==1.13.1
	tabulate==0.9.0
	tenacity==9.1.2
	threadpoolctl==3.6.0
	torch==2.5.1+cu121
	torch-max-mem==0.1.4
	torch-ppr==0.0.8
	tqdm==4.67.1
	triton==3.1.0
	typing-inspect==0.9.0
	typing-inspection==0.4.0
	typing_extensions==4.13.2
	tzdata==2025.2
	uritemplate==4.2.0
	urllib3==2.4.0
	uvicorn==0.27.1
	virtualenv==20.31.2
	websockets==15.0.1
	wincertstore==0.2
