# Supplementary material
Source: Research Square preprint supplement (doi:10.21203/rs.3.rs-9060414/v1)
Supplement: Supplementary file 15 [file f805bcd79cf741a2f57d3242.xlsx]

## Sheet: Supp_Table_14
Dataset	Species	Metric	Value	Interpretation
Intensity	iPSC	Control POST Median	61.8992	Median
Intensity	iPSC	Control PERI Median	67.4499	Median
Intensity	iPSC	AD POST Median	59.597	Median
Intensity	iPSC	AD PERI Median	76.6593	Median
Intensity	iPSC	Fold Change (Control)	0.0896738	Peri > Post
Intensity	iPSC	Fold Change (AD)	0.286294	Peri > Post
Intensity	iPSC	MW POST	0.277467	Not significant
Intensity	iPSC	MW PERI	0.00019	Highly significant (p < 0.001)
Intensity	iPSC	MW (Control Within)	1.9e-06	Highly significant (p < 0.001)
Intensity	iPSC	MW (AD Within)	4.61e-14	Highly significant (p < 0.001)
Intensity	iPSC	t-test POST	0.394688	Not significant
Intensity	iPSC	t-test PERI	5.54e-18	Highly significant (p < 0.001)
Intensity	iPSC	F-test POST	0.783049	Not significant
Intensity	iPSC	F-test PERI	2.27e-120	Highly significant (p < 0.001)
Intensity	iPSC	Cliff Delta POST	-0.0239352	Negligible effect
Intensity	iPSC	Cliff Delta PERI	0.0835967	Negligible effect
Intensity	Mouse	Control POST Median	101.376	Median
Intensity	Mouse	Control PERI Median	32.0171	Median
Intensity	Mouse	AD POST Median	114.681	Median
Intensity	Mouse	AD PERI Median	74.893	Median
Intensity	Mouse	Fold Change (Control)	-0.684175	Peri < Post
Intensity	Mouse	Fold Change (AD)	-0.346945	Peri < Post
Intensity	Mouse	MW POST	0.000332	Highly significant (p < 0.001)
Intensity	Mouse	MW PERI	1.12e-27	Highly significant (p < 0.001)
Intensity	Mouse	MW (Control Within)	1.16e-52	Highly significant (p < 0.001)
Intensity	Mouse	MW (AD Within)	1.77e-33	Highly significant (p < 0.001)
Intensity	Mouse	t-test POST	0.255748	Not significant
Intensity	Mouse	t-test PERI	1.41e-38	Highly significant (p < 0.001)
Intensity	Mouse	F-test POST	6.13e-08	Highly significant (p < 0.001)
Intensity	Mouse	F-test PERI	4.98e-26	Highly significant (p < 0.001)
Intensity	Mouse	Cliff Delta POST	0.105052	Negligible effect
Intensity	Mouse	Cliff Delta PERI	0.457637	Medium effect
Intensity	Human	Control POST Median	7.50235	Median
Intensity	Human	Control PERI Median	10.4894	Median
Intensity	Human	AD POST Median	7.51213	Median
Intensity	Human	AD PERI Median	13.7705	Median
Intensity	Human	Fold Change (Control)	0.398148	Peri > Post
Intensity	Human	Fold Change (AD)	0.833099	Peri > Post
Intensity	Human	MW POST	0.960935	Not significant
Intensity	Human	MW PERI	1.22e-53	Highly significant (p < 0.001)
Intensity	Human	MW (Control Within)	7.2e-58	Highly significant (p < 0.001)
Intensity	Human	MW (AD Within)	5.68e-102	Highly significant (p < 0.001)
Intensity	Human	t-test POST	0.165975	Not significant
Intensity	Human	t-test PERI	1.68e-67	Highly significant (p < 0.001)
Intensity	Human	F-test POST	6.16e-09	Highly significant (p < 0.001)
Intensity	Human	F-test PERI	3.65e-43	Highly significant (p < 0.001)
Intensity	Human	Cliff Delta POST	0.00181031	Negligible effect
Intensity	Human	Cliff Delta PERI	0.444928	Medium effect
Area	iPSC	Control POST Median	0.006977	Median
Area	iPSC	Control PERI Median	0.007276	Median
Area	iPSC	AD POST Median	0.00669	Median
Area	iPSC	AD PERI Median	0.006772	Median
Area	iPSC	Fold Change (Control)	0.0428551	Peri > Post
Area	iPSC	Fold Change (AD)	0.0122571	Peri > Post
Area	iPSC	MW POST	0.00747607	Significant (p < 0.01)
Area	iPSC	MW PERI	0.0187219	Significant (p < 0.05)
Area	iPSC	MW (Control Within)	0.261092	Not significant
Area	iPSC	MW (AD Within)	0.307144	Not significant
Area	iPSC	t-test POST	0.00375437	Significant (p < 0.01)
Area	iPSC	t-test PERI	0.231219	Not significant
Area	iPSC	F-test POST	0.00342327	Significant (p < 0.01)
Area	iPSC	F-test PERI	0.000169	Highly significant (p < 0.001)
Area	iPSC	Cliff Delta POST	-0.0575315	Negligible effect
Area	iPSC	Cliff Delta PERI	-0.0520674	Negligible effect
Area	Mouse	Control POST Median	0.010471	Median
Area	Mouse	Control PERI Median	0.006506	Median
Area	Mouse	AD POST Median	0.0081035	Median
Area	Mouse	AD PERI Median	0.0017885	Median
Area	Mouse	Fold Change (Control)	-0.378665	Peri < Post
Area	Mouse	Fold Change (AD)	-0.779293	Peri < Post
Area	Mouse	MW POST	3.8e-05	Highly significant (p < 0.001)
Area	Mouse	MW PERI	9.98e-23	Highly significant (p < 0.001)
Area	Mouse	MW (Control Within)	4.08e-07	Highly significant (p < 0.001)
Area	Mouse	MW (AD Within)	1.34e-64	Highly significant (p < 0.001)
Area	Mouse	t-test POST	9.85e-12	Highly significant (p < 0.001)
Area	Mouse	t-test PERI	1.98e-20	Highly significant (p < 0.001)
Area	Mouse	F-test POST	0	Highly significant (p < 0.001)
Area	Mouse	F-test PERI	1.55e-15	Highly significant (p < 0.001)
Area	Mouse	Cliff Delta POST	-0.120087	Negligible effect
Area	Mouse	Cliff Delta PERI	-0.40637	Medium effect
Area	Human	Control POST Median	0.010471	Median
Area	Human	Control PERI Median	0.006506	Median
Area	Human	AD POST Median	0.0081035	Median
Area	Human	AD PERI Median	0.0017885	Median
Area	Human	Fold Change (Control)	-0.378665	Peri < Post
Area	Human	Fold Change (AD)	-0.779293	Peri < Post
Area	Human	MW POST	3.8e-05	Highly significant (p < 0.001)
Area	Human	MW PERI	9.98e-23	Highly significant (p < 0.001)
Area	Human	MW (Control Within)	4.08e-07	Highly significant (p < 0.001)
Area	Human	MW (AD Within)	1.34e-64	Highly significant (p < 0.001)
Area	Human	t-test POST	9.85e-12	Highly significant (p < 0.001)
Area	Human	t-test PERI	1.98e-20	Highly significant (p < 0.001)
Area	Human	F-test POST	0	Highly significant (p < 0.001)
Area	Human	F-test PERI	1.55e-15	Highly significant (p < 0.001)
Area	Human	Cliff Delta POST	-0.120087	Negligible effect
Area	Human	Cliff Delta PERI	-0.40637	Medium effect
Length	iPSC	Control POST Median	0.104344	Median
Length	iPSC	Control PERI Median	0.104929	Median
Length	iPSC	AD POST Median	0.100751	Median
Length	iPSC	AD PERI Median	0.102254	Median
Length	iPSC	Fold Change (Control)	0.00560646	Peri > Post
Length	iPSC	Fold Change (AD)	0.014918	Peri > Post
Length	iPSC	MW POST	0.000813	Highly significant (p < 0.001)
Length	iPSC	MW PERI	0.125545	Not significant
Length	iPSC	MW (Control Within)	0.900684	Not significant
Length	iPSC	MW (AD Within)	0.112579	Not significant
Length	iPSC	t-test POST	0.000337	Highly significant (p < 0.001)
Length	iPSC	t-test PERI	0.599414	Not significant
Length	iPSC	F-test POST	0.00344873	Significant (p < 0.01)
Length	iPSC	F-test PERI	3.04e-08	Highly significant (p < 0.001)
Length	iPSC	Cliff Delta POST	-0.0718134	Negligible effect
Length	iPSC	Cliff Delta PERI	-0.0337631	Negligible effect
Length	Mouse	Control POST Median	0.127223	Median
Length	Mouse	Control PERI Median	0.098789	Median
Length	Mouse	AD POST Median	0.111657	Median
Length	Mouse	AD PERI Median	0.0682815	Median
Length	Mouse	Fold Change (Control)	-0.223497	Peri < Post
Length	Mouse	Fold Change (AD)	-0.388471	Peri < Post
Length	Mouse	MW POST	0.000381	Highly significant (p < 0.001)
Length	Mouse	MW PERI	4.24e-13	Highly significant (p < 0.001)
Length	Mouse	MW (Control Within)	1.18e-07	Highly significant (p < 0.001)
Length	Mouse	MW (AD Within)	6.1e-47	Highly significant (p < 0.001)
Length	Mouse	t-test POST	9.14e-06	Highly significant (p < 0.001)
Length	Mouse	t-test PERI	3.99e-12	Highly significant (p < 0.001)
Length	Mouse	F-test POST	0	Highly significant (p < 0.001)
Length	Mouse	F-test PERI	0.611633	Not significant
Length	Mouse	Cliff Delta POST	-0.10421	Negligible effect
Length	Mouse	Cliff Delta PERI	-0.299677	Small effect
Length	Human	Control POST Median	0.048585	Median
Length	Human	Control PERI Median	0.0653775	Median
Length	Human	AD POST Median	0.050413	Median
Length	Human	AD PERI Median	0.072676	Median
Length	Human	Fold Change (Control)	0.345631	Peri > Post
Length	Human	Fold Change (AD)	0.441612	Peri > Post
Length	Human	MW POST	0.527589	Not significant
Length	Human	MW PERI	0.003768	Significant (p < 0.01)
Length	Human	MW (Control Within)	1.47e-23	Highly significant (p < 0.001)
Length	Human	MW (AD Within)	4.63e-21	Highly significant (p < 0.001)
Length	Human	t-test POST	0.121046	Not significant
Length	Human	t-test PERI	1.95e-06	Highly significant (p < 0.001)
Length	Human	F-test POST	5.52e-07	Highly significant (p < 0.001)
Length	Human	F-test PERI	6.58e-14	Highly significant (p < 0.001)
Length	Human	Cliff Delta POST	0.0222222	Negligible effect
Length	Human	Cliff Delta PERI	0.0808231	Negligible effect
